# Supplementary material
Source: publisher site journal article supplement (https://www.spandidos-publications.com/1384/downloadSupplementary)
Supplement: Supplementary file 2 [file downloadSupplementary]

## Sheet: SCI(DMSO)vssham.DEG
Table SI. Differentially expressed genes of different groups.
Gene_id	readcount_SCI_C	readcount_sham	log2FoldChange	pval	padj	Gene name	Interpro Description
ENSMUSG00000000001	2692.94	1598.73	0.75226	2.756e-13	1.3274e-11	Gnai3	P-loop containing nucleoside triphosphate hydrolase||G-protein alpha subunit, group I||G protein alpha subunit, helical insertion||Guanine nucleotide binding protein (G-protein), alpha subunit
ENSMUSG00000000058	1561.28	1291.89	0.27325	0.0064955	0.049277	Cav2	Caveolin||Caveolin, conserved site||Caveolin-2
ENSMUSG00000000078	3133.89	923.831	1.7623	4.5584e-64	2.1142e-61	Klf6	-||Zinc finger C2H2-type||Zinc finger, RING/FYVE/PHD-type||Zinc finger C2H2 superfamily
ENSMUSG00000000093	212.884	137.913	0.62631	0.00069887	0.0074999	Tbx2	T-box superfamily||Transcription factor, T-box, conserved site||p53-like transcription factor, DNA-binding||Transcription factor, T-box, region of unknown function||Transcription factor, T-box||Transcription factor, Brachyury
ENSMUSG00000000149	4570.13	7495.54	-0.7138	4.3167e-10	1.463e-08	Gna12	G-protein alpha subunit, group 12/13||P-loop containing nucleoside triphosphate hydrolase||G protein alpha subunit, helical insertion||Guanine nucleotide binding protein (G-protein), alpha subunit
ENSMUSG00000000184	1446.69	1000.61	0.53187	0.00020132	0.0025415	Ccnd2	Cyclin, N-terminal||Cyclin D||Cyclin-like superfamily||Cyclin-like||Cyclin, C-terminal domain
ENSMUSG00000000197	4210.5	5031.08	-0.25688	0.001668	0.015748	Nalcn	Sodium leak channel non-selective protein||Ion transport domain
ENSMUSG00000000202	1647.6	2768.06	-0.74851	2.9841e-16	1.8724e-14	Btbd17	SKP1/BTB/POZ domain superfamily||BTB/Kelch-associated||BTB/POZ domain
ENSMUSG00000000204	562.532	5.24423	6.7451	2.7512e-08	7.4401e-07	Slfn4	Schlafen family||Schlafen, AAA domain
ENSMUSG00000000223	3900.51	2253.88	0.79126	0.0002138	0.002675	Drp2	WW domain||Dystrophin-related protein 2||EF-hand domain, type 1||Spectrin/alpha-actinin||Zinc finger, ZZ-type||EF-hand domain, type 2||Spectrin repeat||EF-hand domain pair||WW domain superfamily
ENSMUSG00000000275	908.652	305.685	1.5717	6.536e-15	3.6218e-13	Trim25	Concanavalin A-like lectin/glucanase domain superfamily||SPRY domain||SPRY-associated||Butyrophylin-like, SPRY domain||Zinc finger, RING-type, conserved site||Zinc finger, RING-type||Zinc finger, RING/FYVE/PHD-type||B30.2/SPRY domain
ENSMUSG00000000290	777.344	312.608	1.3142	1.082e-09	3.4857e-08	Itgb2	Integrin beta N-terminal||Integrin beta subunit, VWA domain||Integrin beta subunit||Cytochrome c1, transmembrane anchor, C-terminal||Integrin beta-2 subunit||Integrin beta subunit, cytoplasmic domain superfamily||PSI domain||Integrin beta subunit, cytoplasmic domain||Integrin beta subunit, tail||-||von Willebrand factor A-like domain superfamily||Integrin domain superfamily||Integrin beta tail do…
ENSMUSG00000000303	379.266	106.081	1.838	0.0012601	0.012421	Cdh1	Cadherin conserved site||Cadherin prodomain||Cadherin-like||Cadherin||Catenin binding domain superfamily||Cadherin, cytoplasmic domain
ENSMUSG00000000317	127.112	25.0703	2.342	5.9746e-07	1.2975e-05	Bcl6b	Zinc finger C2H2 superfamily||BTB/POZ domain||SKP1/BTB/POZ domain superfamily||Zinc finger, RING/FYVE/PHD-type||Zinc finger C2H2-type
ENSMUSG00000000318	48.4717	22.5946	1.1012	0.0058169	0.045094	Clec10a	C-type lectin-like||-||C-type lectin-like/link domain superfamily||C-type lectin, conserved site||C-type lectin fold||CD209-like, C-type lectin-like domain||Hepatic lectin, N-terminal
ENSMUSG00000000340	1795.42	1132.57	0.66472	1.038e-11	4.1641e-10	Dbt	E3-binding domain superfamily||2-oxo acid dehydrogenase, lipoyl-binding site||Peripheral subunit-binding domain||Single hybrid motif||Branched-chain alpha-ketoacid dehydrogenase complex component E2||-||Biotin/lipoyl attachment||2-oxoacid dehydrogenase acyltransferase, catalytic domain
ENSMUSG00000000384	1775.92	1455.07	0.28747	0.0019208	0.017744	Tbrg4	FAST kinase leucine-rich||-||FAST kinase-like protein, subdomain 2||Armadillo-type fold||RAP domain
ENSMUSG00000000386	44.3566	9.52041	2.2201	0.00012106	0.0016119	Mx1	Dynamin, GTPase region, conserved site||P-loop containing nucleoside triphosphate hydrolase||Dynamin, GTPase domain||GTPase effector domain||Dynamin central domain||Dynamin superfamily||-||Dynamin-type guanine nucleotide-binding (G) domain||Dynamin GTPase effector
ENSMUSG00000000420	3726.12	3087.14	0.2714	0.0019189	0.017737	Galnt1	Nucleotide-diphospho-sugar transferases||Ricin B-like lectins||Ricin B, lectin domain||-||Glycosyltransferase 2-like
ENSMUSG00000000489	1025.42	530.898	0.94971	6.3888e-09	1.8875e-07	Pdgfb	Platelet-derived growth factor subunit B||Platelet-derived growth factor, N-terminal||Cystine-knot cytokine||Platelet-derived growth factor, conserved site||PDGF/VEGF domain
ENSMUSG00000000530	740.985	250.281	1.5659	7.343e-17	4.7903e-15	Acvrl1	Serine-threonine/tyrosine-protein kinase, catalytic domain||Protein kinase-like domain superfamily||-||Protein kinase, ATP binding site||Protein kinase domain||Ser/Thr protein kinase, TGFB receptor||Serine/threonine-protein kinase, active site||GS domain
ENSMUSG00000000555	1885.52	78.0516	4.5944	1.5554e-34	2.607e-32	Itga5	FG-GAP repeat||Integrin alpha beta-propellor||Integrin alpha chain||Integrin domain superfamily||-||Integrin alpha chain, C-terminal cytoplasmic region, conserved site||Integrin alpha-2
ENSMUSG00000000561	983.768	768.375	0.35651	0.00113	0.01134	Wdr77	WD40 repeat, conserved site||WD40 repeat||-||WD40-repeat-containing domain superfamily||WD40-repeat-containing domain||WD40/YVTN repeat-like-containing domain superfamily
ENSMUSG00000000562	43.3197	13.8846	1.6415	0.00048714	0.0054742	Adora3	Adenosine receptor||GPCR, rhodopsin-like, 7TM||Adenosine A3 receptor||G protein-coupled receptor, rhodopsin-like
ENSMUSG00000000567	3485.95	2024.81	0.78376	1.742e-19	1.3813e-17	Sox9	Sox developmental protein N-terminal||High mobility group box domain||High mobility group box domain superfamily||Transcription factor SOX-9
ENSMUSG00000000568	5499.66	4570.44	0.26701	0.0010532	0.010667	Hnrnpd	-||CARG-binding factor, N-terminal||RNA-binding domain superfamily||RNA recognition motif domain
ENSMUSG00000000628	805.895	136.307	2.5637	9.9181e-26	1.1269e-23	Hk2	Hexokinase, binding site||Hexokinase||Hexokinase, N-terminal||Hexokinase, C-terminal
ENSMUSG00000000682	163.404	60.8519	1.4251	1.0212e-07	2.5202e-06	Cd52	CAMPATH-1 antigen (CD52)
ENSMUSG00000000686	78.0841	38.3439	1.026	0.0014636	0.014058	Abhd15	AB hydrolase 4 family||-||Alpha/Beta hydrolase fold
ENSMUSG00000000731	216.637	19.4638	3.4764	6.298e-12	2.5816e-10	Aire	Zinc finger, FYVE/PHD-type||Zinc finger, PHD-type, conserved site||Zinc finger, PHD-finger||Autoimmune regulator, AIRE||Zinc finger, PHD-type||SAND-like domain superfamily||SAND domain||-||Zinc finger, RING/FYVE/PHD-type||HSR domain
ENSMUSG00000000740	14846.7	11700.5	0.34357	0.00028533	0.0034502	Rpl13	Ribosomal protein L13e||Ribosomal protein L13e, conserved site
ENSMUSG00000000776	1370.64	922.222	0.57167	1.2686e-08	3.6215e-07	Polr3d	DNA-directed RNA polymerase III subunit RPC4
ENSMUSG00000000915	3724.08	5646.15	-0.60038	5.4363e-09	1.6231e-07	Hip1r	ENTH/VHS||Huntingtin-interacting protein 1, clathrin-binding domain||I/LWEQ domain||ENTH domain||I/LWEQ domain superfamily||AP180 N-terminal homology (ANTH) domain||Huntingtin-interacting protein 1-related protein||Sla2 family||-
ENSMUSG00000000948	696.797	889.14	-0.35167	0.0062378	0.047686	Gm38393	-
ENSMUSG00000000958	108.241	59.0381	0.87453	0.0014211	0.013732	Slc7a7	Amino acid/polyamine transporter I||-
ENSMUSG00000000982	354.221	7.97626	5.4728	2.8815e-18	2.054e-16	Ccl3	Chemokine interleukin-8-like domain||CC chemokine, conserved site||Chemokine interleukin-8-like superfamily
ENSMUSG00000001025	1680.98	591.716	1.5063	3.0242e-06	5.7395e-05	S100a6	S100/Calbindin-D9k, conserved site||Protein S100-A6||EF-hand domain||S100/CaBP-9k-type, calcium binding, subdomain||-||EF-hand domain pair||EF-Hand 1, calcium-binding site
ENSMUSG00000001029	76.5599	34.4132	1.1536	0.00024233	0.0029879	Icam2	Immunoglobulin-like domain superfamily||Intercellular adhesion molecule, N-terminal||Intercellular adhesion molecule/vascular cell adhesion molecule, N-terminal||Immunoglobulin-like fold||Intercellular adhesion molecule 2||Intercellular adhesion molecule
ENSMUSG00000001034	990.785	1318.44	-0.41219	0.0027716	0.024234	Mapk7	Armadillo-like helical||Mitogen-activated protein (MAP) kinase, conserved site||Serine/threonine-protein kinase, active site||Protein kinase-like domain superfamily||Protein kinase, ATP binding site||-||Protein kinase domain
ENSMUSG00000001036	3569.37	4977.93	-0.47988	1.3662e-08	3.887e-07	Epn2	-||ENTH domain||ENTH/VHS||Ubiquitin interacting motif||Epsin-2, metazoa
ENSMUSG00000001056	2242.99	1461.95	0.61753	2.249e-09	6.9795e-08	Nhp2	Ribosomal protein L7Ae/L30e/S12e/Gadd45||50S ribosomal protein L30e-like||Ribosomal protein L7Ae/L8/Nhp2 family||H/ACA ribonucleoprotein complex, subunit Nhp2, eukaryote
ENSMUSG00000001062	1909.07	2653.28	-0.4749	1.7864e-07	4.2325e-06	Vps9d1	VPS9 domain superfamily||MIT domain superfamily||-||VPS9 domain
ENSMUSG00000001098	1649.99	1128.64	0.54788	1.6663e-08	4.6857e-07	Kctd10	-||SKP1/BTB/POZ domain superfamily||Potassium channel tetramerisation-type BTB domain||BTB/POZ domain
ENSMUSG00000001123	673.482	499.028	0.43252	0.0031494	0.027043	Lgals9	Galectin, carbohydrate recognition domain||Concanavalin A-like lectin/glucanase domain superfamily
ENSMUSG00000001127	8044.18	9343.55	-0.21603	0.0060672	0.046719	Araf	Ubiquitin-like domain superfamily||-||Protein kinase, ATP binding site||Protein kinase domain||Raf-like Ras-binding||Protein kinase-like domain superfamily||Diacylglycerol/phorbol-ester binding||Serine-threonine/tyrosine-protein kinase, catalytic domain||Serine/threonine-protein kinase, active site||Protein kinase C-like, phorbol ester/diacylglycerol-binding domain
ENSMUSG00000001131	2302.35	56.5985	5.3462	2.4975e-22	2.3489e-20	Timp1	Tissue inhibitor of metalloproteinase, conserved site||Protease inhibitor I35 (TIMP)||Metalloproteinase inhibitor 1||Netrin domain||Proteinase inhibitor I35b (TIMP), C-terminal||Tissue inhibitor of metalloproteinases-like, OB-fold
ENSMUSG00000001156	1449.78	806.809	0.84553	6.7024e-05	0.00094673	Mxd1	Helix-loop-helix DNA-binding domain superfamily||-||Myc-type, basic helix-loop-helix (bHLH) domain
ENSMUSG00000001225	4.61011	37.4487	-3.022	2.8682e-07	6.5527e-06	Slc26a3	Sulphate anion transporter, conserved site||SLC26A/SulP transporter||-||STAS domain superfamily||STAS domain||SLC26A/SulP transporter domain||Solute carrier family 26 member 3 (DRA)
ENSMUSG00000001240	550.092	415.808	0.40376	0.0013036	0.01276	Ramp2	Receptor activity modifying protein||-
ENSMUSG00000001247	231.302	58.2662	1.989	2.0184e-12	8.784e-11	Lsr	Immunoglobulin-like domain superfamily||-||LISCH7||Immunoglobulin subtype||Immunoglobulin-like fold
ENSMUSG00000001249	140.188	256.578	-0.87204	1.234e-06	2.5321e-05	Hpn	Serine proteases, trypsin domain||Peptidase S1A, chymotrypsin family||-||Serine proteases, trypsin family, serine active site||Hepsin, SRCR domain||Peptidase S1, PA clan||SRCR-like domain||SRCR-like domain superfamily||Serine proteases, trypsin family, histidine active site
ENSMUSG00000001305	594.078	345.768	0.78085	2.4903e-09	7.7002e-08	Rrp15	Ribosomal RNA-processing protein 15
ENSMUSG00000001334	5763.44	6912.03	-0.26218	0.0012864	0.012643	Fndc5	Fibronectin type III superfamily||Immunoglobulin-like fold||Fibronectin type III
ENSMUSG00000001380	5609.45	4597.86	0.2869	0.00051446	0.0057298	Hars	Anticodon-binding domain superfamily||S15/NS1, RNA-binding||Anticodon-binding||WHEP-TRS domain||Histidine-tRNA ligase||Aminoacyl-tRNA synthetase, class II||Histidyl-anticodon-binding||Histidine-tRNA ligase/ATP phosphoribosyltransferase regulatory subunit
ENSMUSG00000001416	7614.74	6071.51	0.32674	4.9387e-05	0.00071982	Cct3	Chaperonin Cpn60/TCP-1 domain superfamily||GroEL-like equatorial domain superfamily||Chaperonin TCP-1, conserved site||Chaperone tailless complex polypeptide 1 (TCP-1)||T-complex protein 1, gamma subunit||GroEL-like apical domain superfamily||Chaperonin Cpn60/TCP-1 family
ENSMUSG00000001435	904.536	565.711	0.67711	1.9125e-06	3.7452e-05	Col18a1	C-type lectin fold||C-type lectin-like/link domain superfamily||Collagenase NC10/endostatin||Domain of unknown function DUF959, collagen XVIII, N-terminal||Laminin G domain||-||Insect cysteine-rich antifreeze protein||Collagen triple helix repeat||Collagen alpha-1(XVIII) chain, frizzled domain||Concanavalin A-like lectin/glucanase domain superfamily||Frizzled cysteine-rich domain superfamily||Fri…
ENSMUSG00000001440	8621.06	6614.82	0.38216	1.7505e-06	3.4619e-05	Kpnb1	Importin-beta, N-terminal domain||Armadillo-type fold||Armadillo-like helical||HEAT, type 2||Armadillo
ENSMUSG00000001473	3052.4	660.128	2.2091	3.1469e-49	9.4291e-47	Tubb6	Tubulin/FtsZ, 2-layer sandwich domain||Beta tubulin||Tubulin/FtsZ, C-terminal||Tubulin/FtsZ, GTPase domain||Tubulin, conserved site||Tubulin/FtsZ, GTPase domain superfamily||Tubulin/FtsZ, C-terminal domain superfamily||Tubulin||Beta tubulin, autoregulation binding site
ENSMUSG00000001493	70.5127	131.994	-0.90452	0.00030895	0.003712	Meox1	Homeobox domain, metazoa||Homeobox, conserved site||Homeobox-like domain superfamily||Homeobox domain
ENSMUSG00000001497	13.3145	1.07946	3.6246	0.0009735	0.0099459	Pax9	Homeobox-like domain superfamily||Winged helix-like DNA-binding domain superfamily||Paired box protein PAX9||Paired domain
ENSMUSG00000001520	1343.24	1757.44	-0.38775	0.00073785	0.0078536	Nrip2	-||Aspartic peptidase, DDI1-type||Aspartic peptidase domain superfamily
ENSMUSG00000001525	19736.1	23100.8	-0.22711	0.0042008	0.034502	Tubb5	Tubulin/FtsZ, GTPase domain||Tubulin/FtsZ, C-terminal||Beta tubulin||Tubulin/FtsZ, 2-layer sandwich domain||Beta tubulin, autoregulation binding site||Tubulin||Tubulin/FtsZ, C-terminal domain superfamily||Tubulin/FtsZ, GTPase domain superfamily||Tubulin, conserved site
ENSMUSG00000001542	1730.02	1154.41	0.58363	1.2922e-09	4.1121e-08	Ell2	Occludin homology domain||-||ELL/occludin family||RNA polymerase II elongation factor ELL2||RNA polymerase II elongation factor ELL, N-terminal||Winged helix DNA-binding domain superfamily
ENSMUSG00000001627	2462.22	690.288	1.8347	1.4534e-75	8.3405e-73	Ifrd1	-||Armadillo-like helical||Interferon-related developmental regulator, C-terminal||Armadillo-type fold||Interferon-related developmental regulator, N-terminal
ENSMUSG00000001665	210.179	328.178	-0.64286	0.0049852	0.039922	Gstt3	-||Glutathione S-transferase, C-terminal domain superfamily||Glutathione S-transferase, C-terminal||Glutathione S-transferase, C-terminal-like||Thioredoxin-like superfamily||Glutathione S-transferase, N-terminal
ENSMUSG00000001674	1073.83	720.162	0.57637	9.0391e-08	2.2454e-06	Ddx18	DEAD/DEAH box helicase domain||Helicase superfamily 1/2, ATP-binding domain||Helicase, C-terminal||ATP-dependent RNA helicase DEAD-box, conserved site||P-loop containing nucleoside triphosphate hydrolase||Domain of unknown function DUF4217||RNA helicase, DEAD-box type, Q motif
ENSMUSG00000001707	1562.41	1220.31	0.35652	0.0059631	0.046053	Eef1e1	Glutathione S-transferase, C-terminal domain superfamily||Glutathione S-transferase, C-terminal-like||Glutathione S-transferase, C-terminal
ENSMUSG00000001739	23.8771	7.06734	1.7564	0.005935	0.045889	Cldn15	Claudin, conserved site||PMP-22/EMP/MP20/Claudin superfamily||Claudin||Claudin-15
ENSMUSG00000001741	202.385	106.495	0.92632	0.00044032	0.0050349	Il16	-||PDZ domain||PDZ superfamily||Interleukin-16
ENSMUSG00000001750	818.041	1150.11	-0.49153	6.5477e-06	0.00011552	Tcirg1	-||V-type ATPase, V0 complex, 116kDa subunit family||ATPase, V0 complex, subunit 116kDa, eukaryotic
ENSMUSG00000001751	423.661	598.939	-0.4995	0.00030925	0.0037143	Naglu	Alpha-N-acetylglucosaminidase, C-terminal||Chitobiase/beta-hexosaminidase-like, domain 2||Alpha-N-acetylglucosaminidase, tim-barrel domain||Alpha-N-acetylglucosaminidase||Alpha-N-acetylglucosaminidase, N-terminal
ENSMUSG00000001761	1778.62	2279.08	-0.35769	0.0036363	0.030604	Smo	Frizzled domain||GPCR, family 2-like||Smoothened, transmembrane domain||Smoothened||Frizzled/secreted frizzled-related protein||Frizzled cysteine-rich domain superfamily||Frizzled/Smoothened, transmembrane domain
ENSMUSG00000001767	792.598	593.381	0.41763	0.0062604	0.047826	Crnkl1	HAT (Half-A-TPR) repeat||Tetratricopeptide-like helical domain superfamily||Tetratricopeptide repeat-containing domain
ENSMUSG00000001768	1990	1282.43	0.63389	4.0145e-11	1.5252e-09	Rin2	-||Ubiquitin-like domain superfamily||Ras and Rab interactor 2, SH2 domain||Ras-associating (RA) domain||SH2 domain superfamily||VPS9 domain||VPS9 domain superfamily||SH2 domain
ENSMUSG00000001773	635.173	819.301	-0.36724	0.0013942	0.013503	Folh1	PA domain||Transferrin receptor-like, dimerisation domain||Transferrin receptor-like, dimerisation domain superfamily||Peptidase M28
ENSMUSG00000001783	5486.53	4611.72	0.25059	0.0026015	0.022967	Rtcb	tRNA-splicing ligase RtcB homologue, eukaryotic||tRNA-splicing ligase, RtcB||tRNA-splicing ligase RtcB-like superfamily
ENSMUSG00000001785	1055.73	747.153	0.49877	5.9234e-06	0.00010583	Pwp1	Six-bladed beta-propeller, TolB-like||G-protein beta WD-40 repeat||WD40-repeat-containing domain superfamily||WD40 repeat||WD40 repeat, conserved site||WD40/YVTN repeat-like-containing domain superfamily||WD40-repeat-containing domain||-
ENSMUSG00000001786	2441.03	2904.45	-0.25077	0.0041622	0.03423	Fbxo7	PI31 proteasome regulator, N-terminal||-||F-box domain||F-box-like domain superfamily||Ubiquitin-like domain superfamily
ENSMUSG00000001802	3828.36	4786.96	-0.32238	0.00020255	0.0025523	Lrp3	Spermadhesin, CUB domain superfamily||LDL receptor-like superfamily||Low-density lipoprotein (LDL) receptor class A repeat||Low-density lipoprotein (LDL) receptor class A, conserved site||CUB domain
ENSMUSG00000001833	12079.3	14557.8	-0.26925	0.00068871	0.007405	Sept7	Septin-type guanine nucleotide-binding (G) domain||Septin||P-loop containing nucleoside triphosphate hydrolase||Septin 7
ENSMUSG00000001864	417.762	798.68	-0.93494	3.1436e-11	1.204e-09	Aif1l	EF-hand domain||EF-hand domain pair||Allograft inflammatory factor 1-like
ENSMUSG00000001911	4760.33	7375.75	-0.63173	1.164e-14	6.3262e-13	Nfix	CTF transcription factor/nuclear factor 1, N-terminal||CTF transcription factor/nuclear factor 1, conserved site||MAD homology 1, Dwarfin-type||CTF transcription factor/nuclear factor 1, DNA-binding domain||CTF transcription factor/nuclear factor 1
ENSMUSG00000001918	767.492	270.708	1.5034	2.0003e-07	4.7097e-06	Slc1a5	Sodium:dicarboxylate symporter superfamily||Sodium:dicarboxylate symporter, conserved site||Sodium:dicarboxylate symporter
ENSMUSG00000001930	1391.55	504.875	1.4627	8.971e-38	1.7867e-35	Vwf	SCO-spondin||Uncharacterised domain, cysteine-rich||VWFC domain||von Willebrand factor, VWA N-terminal domain||von Willebrand factor, type D domain||Cystine knot, C-terminal||Trypsin Inhibitor-like, cysteine rich domain||Serine protease inhibitor-like superfamily||Von Willebrand factor-related||von Willebrand factor, type A||von Willebrand factor A-like domain superfamily||-
ENSMUSG00000001942	882.369	1140.33	-0.37	0.00041551	0.0047867	Siae	Sialate O-acetylesterase domain||SGNH hydrolase superfamily
ENSMUSG00000001943	87.847	39.8786	1.1394	0.00035565	0.0041942	Vsig2	Immunoglobulin I-set||Immunoglobulin-like domain||Immunoglobulin-like fold||Immunoglobulin subtype 2||Immunoglobulin V-set domain||Immunoglobulin subtype||Cytochrome c1, transmembrane anchor, C-terminal||Immunoglobulin-like domain superfamily
ENSMUSG00000001946	746.891	240.671	1.6338	7.1303e-35	1.2131e-32	Esam	Immunoglobulin subtype 2||Immunoglobulin-like fold||Immunoglobulin V-set domain||Immunoglobulin subtype||Cytochrome c1, transmembrane anchor, C-terminal||Immunoglobulin-like domain superfamily||-||Immunoglobulin-like domain
ENSMUSG00000001964	1607.44	1183.06	0.44224	6.2707e-06	0.00011145	Emd	-||LEM domain||LEM/LEM-like domain superfamily||Emerin, LEM domain||Emerin
ENSMUSG00000001986	4017.29	4841.55	-0.26924	0.0031859	0.027322	Gria3	Ionotropic glutamate receptor||Receptor, ligand binding region||-||Ionotropic glutamate receptor, L-glutamate and glycine-binding domain||Periplasmic binding protein-like I||Ionotropic glutamate receptor, metazoa
ENSMUSG00000001988	324.91	479.219	-0.56065	3.0872e-05	0.00047233	Npas1	Myc-type, basic helix-loop-helix (bHLH) domain||PAS fold-3||PAS domain superfamily||PAS domain||Helix-loop-helix DNA-binding domain superfamily||PAS fold
ENSMUSG00000001995	5593.46	4336.33	0.36727	8.4802e-06	0.00014687	Sipa1l2	PDZ domain||Signal-induced proliferation-associated 1-like protein, C-terminal||Rap GTPase activating protein domain||PDZ superfamily||Signal-induced proliferation-associated 1-like protein 2||Rap/Ran-GAP superfamily
ENSMUSG00000002007	275.79	423.996	-0.62048	3.7318e-05	0.0005576	Srpk3	Protein kinase-like domain superfamily||Protein kinase domain||Protein kinase, ATP binding site||Serine/threonine-protein kinase, active site
ENSMUSG00000002012	3276.49	3875.3	-0.24216	0.0037451	0.031316	Pnck	Serine/threonine-protein kinase, active site||Protein kinase domain||Protein kinase, ATP binding site||Protein kinase-like domain superfamily
ENSMUSG00000002020	119.734	21.6014	2.4706	3.8725e-15	2.1962e-13	Ltbp2	TB domain||Growth factor receptor cysteine-rich domain superfamily||EGF-like calcium-binding, conserved site||TGF-beta binding (TB) domain superfamily||EGF-type aspartate/asparagine hydroxylation site||EGF-like, conserved site||EGF-like calcium-binding domain||EGF-like domain
ENSMUSG00000002032	2960.63	3665.24	-0.308	0.0036036	0.030366	Tmem25	-||Immunoglobulin-like domain||Immunoglobulin-like domain superfamily||Immunoglobulin-like fold||CD80-like, immunoglobulin C2-set
ENSMUSG00000002052	9372.16	7422.8	0.33642	2.2404e-05	0.00035381	Supt6	Transcription elongation factor Spt6||Ribonuclease H-like superfamily||Spt6, SH2 domain||Tex-like protein, HTH domain superfamily||RuvA domain 2-like||S1 domain||RNA-binding domain, S1||SH2 domain||Transcription elongation factor Spt6, YqgF domain||Helix-turn-helix DNA-binding domain of Spt6||Spt6 acidic, N-terminal domain||Spt6, SH2 domain, C terminus||Spt6, SH2 domain, N terminus||Death-like do…
ENSMUSG00000002059	845.261	1293.74	-0.61408	7.6918e-05	0.0010713	Rab34	Small GTPase superfamily||Small GTP-binding protein domain||-||P-loop containing nucleoside triphosphate hydrolase
ENSMUSG00000002109	202.07	286.555	-0.50396	0.0020657	0.018923	Ddb2	WD40-repeat-containing domain superfamily||WD40 repeat, conserved site||WD40 repeat||DNA damage-binding protein 2||WD40-repeat-containing domain||WD40/YVTN repeat-like-containing domain superfamily
ENSMUSG00000002111	712.871	293.283	1.2813	3.0757e-06	5.8242e-05	Spi1	Winged helix-like DNA-binding domain superfamily||Ets domain||Winged helix DNA-binding domain superfamily||-
ENSMUSG00000002129	2841.91	2151.55	0.40149	0.00018837	0.0023905	Sf3a1	Ubiquitin-like domain superfamily||Splicing factor 3A subunit 1||SWAP/Surp superfamily||Splicing factor 3A subunit 1, ubiquitin domain||SWAP/Surp||Ubiquitin domain
ENSMUSG00000002147	608.071	358.802	0.76105	0.00048403	0.0054446	Stat6	STAT transcription factor, DNA-binding||SH2 domain||STAT transcription factor, protein interaction||STAT transcription factor, all-alpha domain||STAT6, SH2 domain||STAT transcription factor, coiled coil||STAT transcription factor, N-terminal domain superfamily||STAT transcription factor, DNA-binding, N-terminal||SH2 domain superfamily||Transcription factor STAT||p53-like transcription factor, DNA…
ENSMUSG00000002233	1885.16	859.51	1.1331	3.1849e-07	7.2131e-06	Rhoc	Small GTP-binding protein domain||Small GTPase superfamily||Small GTPase superfamily, Rho type||P-loop containing nucleoside triphosphate hydrolase
ENSMUSG00000002249	508.798	239.207	1.0888	1.8721e-11	7.2688e-10	Tead3	Transcriptional enhancer factor, metazoa||TEA/ATTS domain||Transcriptional enhancer factor TEF-5 (TEAD3)
ENSMUSG00000002250	2662.23	1564.45	0.76698	5.8599e-16	3.6008e-14	Ppard	Nuclear hormone receptor||Zinc finger, NHR/GATA-type||Nuclear hormone receptor-like domain superfamily||Peroxisome proliferator-activated receptor, beta||Zinc finger, nuclear hormone receptor-type||Nuclear hormone receptor, ligand-binding domain||Peroxisome proliferator-activated receptor
ENSMUSG00000002265	20574.7	27043.2	-0.39439	0.00016239	0.0020993	Peg3	Zinc finger C2H2-type||-||Zinc finger C2H2 superfamily
ENSMUSG00000002274	271.054	439.979	-0.69885	1.7191e-06	3.4158e-05	Metrn	-
ENSMUSG00000002279	765.899	986.585	-0.36529	0.00074535	0.0079177	Lmf1	Lipase maturation factor||-
ENSMUSG00000002289	1093.39	74.2278	3.8807	2.6999e-52	8.9621e-50	Angptl4	-||Fibrinogen, conserved site||Fibrinogen, alpha/beta/gamma chain, C-terminal globular domain||Fibrinogen-like, C-terminal||Angiopoietin-related protein 4||Fibrinogen, alpha/beta/gamma chain, C-terminal globular, subdomain 2||Fibrinogen, alpha/beta/gamma chain, C-terminal globular, subdomain 1
ENSMUSG00000002307	1008.33	819.154	0.29976	0.006297	0.047987	Daxx	Daxx protein||Daxx, N-terminal Rassf1C-interacting domain||WD40/YVTN repeat-like-containing domain superfamily
ENSMUSG00000002325	1419.12	394.862	1.8456	9.0931e-51	2.7737e-48	Irf9	Interferon regulatory factor-3||Interferon regulatory factor, conserved site||SMAD/FHA domain superfamily||Winged helix DNA-binding domain superfamily||Interferon regulatory factor DNA-binding domain||Winged helix-like DNA-binding domain superfamily||SMAD-like domain superfamily
ENSMUSG00000002332	5514.11	3952.91	0.48021	5.4335e-07	1.1877e-05	Dhrs1	Short-chain dehydrogenase/reductase SDR||NAD(P)-binding domain superfamily
ENSMUSG00000002341	2893.91	3780.07	-0.38539	8.5704e-06	0.00014813	Ncan	C-type lectin fold||EGF-type aspartate/asparagine hydroxylation site||Immunoglobulin-like domain||Immunoglobulin subtype||EGF-like calcium-binding domain||Link domain||C-type lectin-like/link domain superfamily||EGF-like calcium-binding, conserved site||C-type lectin-like||C-type lectin, conserved site||Immunoglobulin V-set domain||EGF-like domain||EGF-like, conserved site||Immunoglobulin-like fo…
ENSMUSG00000002409	878.496	1140.54	-0.37661	0.00083084	0.008684	Dyrk1b	Protein kinase-like domain superfamily||Protein kinase, ATP binding site||Protein kinase domain||Dual specificity tyrosine-phosphorylation-regulated kinase 1B||Serine/threonine-protein kinase, active site
ENSMUSG00000002428	711.168	903.182	-0.34483	0.0016312	0.015461	Hltf	P-loop containing nucleoside triphosphate hydrolase||HIRAN domain||Helicase superfamily 1/2, ATP-binding domain||Helicase, C-terminal||SNF2-related, N-terminal domain||Zinc finger, RING/FYVE/PHD-type||-||Zinc finger, RING-type||Zinc finger, RING-type, conserved site
ENSMUSG00000002459	1069.75	381.652	1.4869	1.0842e-36	2.0281e-34	Rgs20	-||RGS domain||RGS, subdomain 1||RGS domain superfamily
ENSMUSG00000002550	1869.69	1509.81	0.30843	0.00084896	0.0088444	Uck1	Uridine-cytidine kinase 1||Uridine kinase-like||Phosphoribulokinase/uridine kinase||P-loop containing nucleoside triphosphate hydrolase
ENSMUSG00000002603	618.788	240.87	1.3612	4.8944e-09	1.4685e-07	Tgfb1	Transforming growth factor-beta||-||Transforming growth factor-beta-related||TGF-beta, propeptide||Transforming growth factor, beta 1||Cystine-knot cytokine||Transforming growth factor beta, conserved site||Transforming growth factor-beta, C-terminal
ENSMUSG00000002625	1819.52	2597.84	-0.51375	0.00019028	0.0024129	Akap8l	A-kinase anchoring protein 95 (AKAP95)||At2g23090-like||Zinc finger C2H2 AKAP95-type
ENSMUSG00000002688	445.315	291.906	0.60932	1.8626e-05	0.0002993	Prkd1	PH-like domain superfamily||Protein kinase C-like, phorbol ester/diacylglycerol-binding domain||Pleckstrin homology domain||Serine/threonine-protein kinase, active site||Protein kinase-like domain superfamily||Diacylglycerol/phorbol-ester binding||Protein kinase, ATP binding site||Protein kinase domain||Protein kinase C mu-related
ENSMUSG00000002699	182.345	59.4174	1.6177	1.5132e-11	5.9435e-10	Lcp2	SH2 domain superfamily||Sterile alpha motif domain||SH2 domain||Sterile alpha motif/pointed domain superfamily
ENSMUSG00000002733	1544	1262.28	0.29064	0.0030343	0.026201	Plekha3	PH-like domain superfamily||Pleckstrin homology domain
ENSMUSG00000002748	5165.67	4383.62	0.23683	0.0043984	0.03585	Baz1b	Zinc finger, RING/FYVE/PHD-type||DDT domain||WSTF/Acf1/Cbp146||Zinc finger, RING-type||Bromodomain, conserved site||WHIM2 domain||Zinc finger, PHD-type||Tyrosine-protein kinase BAZ1B, bromodomain||Bromodomain-like superfamily||Bromodomain||Armadillo-like helical||Zinc finger, PHD-finger||Zinc finger, FYVE/PHD-type||WHIM1 domain||Zinc finger, PHD-type, conserved site
ENSMUSG00000002763	2706.56	3482.12	-0.36351	0.0014553	0.013994	Pex6	AAA+ ATPase domain||P-loop containing nucleoside triphosphate hydrolase||ATPase, AAA-type, core||ATPase, AAA-type, conserved site
ENSMUSG00000002771	2768.74	3434.2	-0.31074	0.002477	0.02214	Grin2d	Periplasmic binding protein-like I||Ionotropic glutamate receptor, metazoa||Ionotropic glutamate receptor||Receptor, ligand binding region||-||Ionotropic glutamate receptor, L-glutamate and glycine-binding domain
ENSMUSG00000002781	987.083	1348.1	-0.44968	1.232e-05	0.0002062	Tmem143	Protein of unknown function DUF3754||-
ENSMUSG00000002803	1626.04	2076.08	-0.3525	0.00017448	0.0022293	Btbd6	BTB/Kelch-associated||PHR||-||SKP1/BTB/POZ domain superfamily||BTB/POZ domain
ENSMUSG00000002831	3939.86	239.096	4.0425	4.7915e-60	2.0279e-57	Plin4	Perilipin
ENSMUSG00000002833	3278.69	2585.76	0.34253	0.00021228	0.002661	Hdgfl2	PWWP domain||HDGF-related, PWWP domain||HIV integrase-binding domain superfamily||Lens epithelium-derived growth factor, integrase-binding domain||TFIIS/LEDGF domain superfamily
ENSMUSG00000002847	269.626	63.8927	2.0772	1.2344e-05	0.00020649	Pla1a	Lipase/vitellogenin||Alpha/Beta hydrolase fold||Lipase, LIPH-type||Lipase, N-terminal||Triacylglycerol lipase family
ENSMUSG00000002881	1722.57	1370.81	0.32953	0.00049349	0.0055308	Nab1	NAB co-repressor, domain||Nab, N-terminal||Nab1, C-terminal
ENSMUSG00000002885	359.575	221.127	0.70141	0.00016824	0.0021643	Adgre5	GPCR, family 2-like||-||EGF-like calcium-binding, conserved site||EGF-type aspartate/asparagine hydroxylation site||GPCR, family 2, secretin-like||GPCR, family 2, CD97 antigen||GPS motif||EGF-like calcium-binding domain||EGF-like domain
ENSMUSG00000002897	2365.46	566.825	2.0611	3.4925e-44	8.5688e-42	Il17ra	Interleukin-17 receptor, fibronectin-III-like domain 1||SEFIR domain
ENSMUSG00000002900	794.233	517.068	0.61921	0.00020491	0.0025781	Lamb1	-||Galactose-binding-like domain superfamily||Laminin EGF domain||Laminin IV type B||Laminin, N-terminal||EGF-like domain
ENSMUSG00000002944	85.9302	18.7761	2.1943	0.00014895	0.001939	Cd36	CD36/scavenger receptor class B member 1||CD36||CD36 family
ENSMUSG00000002948	2801.9	2303.85	0.28236	0.0011836	0.011787	Map2k7	Protein kinase-like domain superfamily||Protein kinase domain||Serine/threonine-protein kinase, active site
ENSMUSG00000002957	5594.42	4378.92	0.35341	1.8829e-05	0.00030242	Ap2a2	Adaptor protein complex AP-2, alpha subunit||Clathrin adaptor, alpha-adaptin, appendage, C-terminal subdomain||Armadillo-type fold||Clathrin/coatomer adaptor, adaptin-like, N-terminal||Clathrin adaptor, appendage, Ig-like subdomain superfamily||Clathrin adaptor, alpha/beta/gamma-adaptin, appendage, Ig-like subdomain||Armadillo-like helical||Coatomer/calthrin adaptor appendage, C-terminal subdomain
ENSMUSG00000002980	981.153	698.824	0.48955	6.2275e-06	0.0001108	Bcam	Immunoglobulin-like domain superfamily||Immunoglobulin subtype 2||Immunoglobulin-like fold||CD80-like, immunoglobulin C2-set||Immunoglobulin subtype||-||Immunoglobulin I-set||Immunoglobulin-like domain
ENSMUSG00000002983	525.074	280.835	0.9028	6.6743e-11	2.4855e-09	Relb	Immunoglobulin-like fold||Rel homology dimerisation domain||Transcription factor RelB||Rel homology domain, conserved site||NF-kappa-B/Dorsal||Immunoglobulin E-set||NFkappaB IPT domain||p53-like transcription factor, DNA-binding||RelB transactivation domain||Rel homology domain (RHD), DNA-binding domain||Rel homology domain (RHD), DNA-binding domain superfamily||RelB leucine zipper||IPT domain||-
ENSMUSG00000003032	771.297	170.309	2.1791	2.1945e-07	5.1348e-06	Klf4	Zinc finger C2H2-type||-||Zinc finger C2H2 superfamily
ENSMUSG00000003119	1243.03	815.768	0.60763	6.4553e-09	1.9055e-07	Cdk12	Serine/threonine-protein kinase, active site||Protein kinase-like domain superfamily||Protein kinase domain||Protein kinase, ATP binding site
ENSMUSG00000003123	766.968	482.896	0.66745	1.7539e-08	4.9159e-07	Lipe	Lipase, GDXG, putative histidine active site||Lipase, GDXG, putative serine active site||Hormone-sensitive lipase, N-terminal||Alpha/beta hydrolase fold-3||-||Alpha/Beta hydrolase fold
ENSMUSG00000003184	1031.12	845.809	0.28581	0.0051522	0.041038	Irf3	Interferon regulatory factor-3||-||Interferon regulatory factor, conserved site||Winged helix-like DNA-binding domain superfamily||SMAD-like domain superfamily||Winged helix DNA-binding domain superfamily||SMAD/FHA domain superfamily||Interferon regulatory factor DNA-binding domain
ENSMUSG00000003200	2019.42	1562.81	0.3698	4.7252e-05	0.00069199	Sh3gl1	Endophilin-A, SH3 domain||SH3 domain||SH3-like domain superfamily||BAR domain||Endophilin-A||AH/BAR domain superfamily
ENSMUSG00000003226	4637.86	3634.69	0.35163	3.6604e-05	0.00054765	Ranbp2	Tetratricopeptide repeat||Tetratricopeptide repeat-containing domain||PH-like domain superfamily||Cyclophilin-like domain superfamily||Zinc finger, RanBP2-type superfamily||Cyclophilin-type peptidyl-prolyl cis-trans isomerase, conserved site||Cyclophilin-type peptidyl-prolyl cis-trans isomerase domain||Tetratricopeptide-like helical domain superfamily||Zinc finger, RanBP2-type||Nup358/RanBP2 E3 l…
ENSMUSG00000003228	733.854	437.572	0.74597	2.2052e-05	0.00034857	Grk5	GPCR kinase||RGS domain superfamily||Protein kinase-like domain superfamily||RGS domain||AGC-kinase, C-terminal||Protein kinase, ATP binding site||Protein kinase domain
ENSMUSG00000003269	2238.52	1665.04	0.42699	2.7945e-06	5.3395e-05	Cyth2	Sec7 domain superfamily||Sec7 domain||Sec7, C-terminal domain superfamily||Pleckstrin homology domain||-||PH-like domain superfamily
ENSMUSG00000003273	2363.17	3327.52	-0.49372	3.1779e-07	7.2019e-06	Car11	Carbonic anhydrase, alpha-class||Alpha carbonic anhydrase superfamily||Alpha carbonic anhydrase||-
ENSMUSG00000003283	324.246	103.744	1.6441	1.1029e-19	8.8905e-18	Hck	SH2 domain||SH2 domain superfamily||Tyrosine-protein kinase, active site||SH3-like domain superfamily||Tyrosine-protein kinase HCK, SH2 domain||Protein kinase domain||Tyrosine-protein kinase, catalytic domain||Protein kinase, ATP binding site||Protein kinase-like domain superfamily||SH3 domain||Serine-threonine/tyrosine-protein kinase, catalytic domain
ENSMUSG00000003363	9611.48	11503.1	-0.25919	0.001124	0.011286	Pld3	Phospholipase D/Transphosphatidylase||-||PLD-like domain
ENSMUSG00000003420	814.883	1241.01	-0.60685	0.0034718	0.029439	Fcgrt	Immunoglobulin-like domain superfamily||MHC class I-like antigen recognition-like||MHC classes I/II-like antigen recognition protein||Immunoglobulin/major histocompatibility complex, conserved site||Immunoglobulin-like fold||Immunoglobulin C1-set||MHC class I-like antigen recognition-like superfamily||Immunoglobulin-like domain||-||MHC class I alpha chain, alpha1 alpha2 domains
ENSMUSG00000003437	3136.23	2667.95	0.2333	0.0063444	0.048304	Paf1	RNA polymerase II associated factor Paf1
ENSMUSG00000003477	2.9439	49.4971	-4.0715	0.00013957	0.0018328	Inmt	Methyltransferase NNMT/PNMT/TEMT, conserved site||Methyltransferase, NNMT/PNMT/TEMT||S-adenosyl-L-methionine-dependent methyltransferase
ENSMUSG00000003484	94.1823	22.1981	2.085	0.00013532	0.00178	Cyp4f18	Cytochrome P450, E-class, group IV||Cytochrome P450, conserved site||Cytochrome P450 superfamily||Cytochrome P450||Cytochrome P450, E-class, group I
ENSMUSG00000003541	1584.47	358.149	2.1454	9.1427e-13	4.1607e-11	Ier3	Radiation-inducible immediate-early gene IEX-1
ENSMUSG00000003545	794.158	105.407	2.9135	4.2477e-25	4.6543e-23	Fosb	Transcription factor, Skn-1-like, DNA-binding domain superfamily||Basic-leucine zipper domain||Protein FosB||AP-1 transcription factor
ENSMUSG00000003546	1263.95	1849.14	-0.54891	9.5685e-09	2.7643e-07	Klc4	Winged helix-like DNA-binding domain superfamily||Tetratricopeptide repeat-containing domain||Tetratricopeptide repeat||Kinesin light chain||Tetratricopeptide-like helical domain superfamily||Kinesin light chain repeat
ENSMUSG00000003549	848.045	503.174	0.75308	2.0883e-10	7.3117e-09	Ercc1	Restriction endonuclease type II-like||-||ERCC1/RAD10/SWI10 family||RuvA domain 2-like
ENSMUSG00000003604	894.324	709.119	0.33477	0.0020936	0.019148	Aven	Cell death regulator Aven
ENSMUSG00000003617	2867.19	879.06	1.7056	2.7208e-08	7.3696e-07	Cp	Cupredoxin||Ceruloplasmin||Multicopper oxidase, type 1||Multicopper oxidases, conserved site||Multicopper oxidase, copper-binding site||Multicopper oxidase, type 2||-||Coagulation factor 5/8-like||Multicopper oxidase, type 3
ENSMUSG00000003665	497.628	109.678	2.1818	1.9403e-06	3.7951e-05	Has1	Nucleotide-diphospho-sugar transferases||Hyaluronan synthase 1
ENSMUSG00000003746	1841.86	1095.71	0.7493	5.5414e-15	3.0961e-13	Man1a	Glycoside hydrolase family 47||Seven-hairpin glycosidases||-
ENSMUSG00000003752	757.595	284.639	1.4123	9.6376e-28	1.1997e-25	Itpkc	Inositol polyphosphate kinase
ENSMUSG00000003762	908.852	609.186	0.57716	2.8772e-07	6.5644e-06	Coq8b	Atypical kinase COQ8B||UbiB domain||Protein kinase-like domain superfamily||-||UbiB domain, ADCK3-like
ENSMUSG00000003848	1809.3	1497.82	0.27256	0.0040785	0.033647	Nob1	PIN domain||PIN-like domain superfamily||Putative WW-binding domain and destruction box||Ribonuclease Nob1, eukaryote||Nin one binding (NOB1) Zn-ribbon-like||Ribonuclease, PIN domain||NOB1 zinc finger-like superfamily||-
ENSMUSG00000003868	1791.98	1430.48	0.32506	0.00041928	0.0048224	Ruvbl2	RuvB-like||TIP49, C-terminal||-||Nucleic acid-binding, OB-fold||P-loop containing nucleoside triphosphate hydrolase||AAA+ ATPase domain
ENSMUSG00000003872	1019.66	1325.88	-0.37887	0.0002152	0.0026906	Lin7b	PDZ domain||PDZ superfamily||-||L27 domain, C-terminal||L27 domain superfamily||Protein lin-7||L27 domain
ENSMUSG00000003934	14099.4	18268.6	-0.37373	0.00025828	0.0031581	Efnb3	Ephrin-B ectodomain||Ephrin receptor-binding domain||Cupredoxin||Ephrin, conserved site||Ephrin
ENSMUSG00000003948	1053.66	717.017	0.55533	4.3636e-07	9.7134e-06	Mmd	AdipoR/Haemolysin-III-related||Hly-III
ENSMUSG00000003949	1942.23	2398.27	-0.30428	0.0010558	0.01069	Hlf	Basic-leucine zipper domain||Hepatic leukemia factor
ENSMUSG00000003970	14502.3	11949.6	0.27932	0.00040757	0.0047078	Rpl8	Ribosomal protein L2, archaeal-type||Ribosomal protein L2, domain 2||Ribosomal protein L2, domain 3||Translation protein SH3-like domain superfamily||Ribosomal protein L2, conserved site||Nucleic acid-binding, OB-fold||Ribosomal protein L2||Ribosomal protein L2, C-terminal||Ribosomal Proteins L2, RNA binding domain
ENSMUSG00000003974	639.385	1156.82	-0.8554	2.4234e-07	5.62e-06	Grm3	GPCR family 3, C-terminal||GPCR, family 3, conserved site||GPCR, family 3, metabotropic glutamate receptor||GPCR, family 3, nine cysteines domain||Periplasmic binding protein-like I||GPCR, family 3, metabotropic glutamate receptor 3||Receptor, ligand binding region||GPCR, family 3
ENSMUSG00000004040	12737.9	4182.75	1.6066	3.6284e-86	2.6707e-83	Stat3	STAT3, SH2 domain||STAT transcription factor, protein interaction||STAT transcription factor, all-alpha domain||SH2 domain||STAT transcription factor, DNA-binding||STAT transcription factor, coiled coil||STAT transcription factor, N-terminal domain superfamily||SH2 domain superfamily||STAT transcription factor, DNA-binding, N-terminal||Transcription factor STAT||p53-like transcription factor, DNA…
ENSMUSG00000004043	496.741	227.87	1.1243	8.9625e-08	2.2346e-06	Stat5a	STAT transcription factor, N-terminal domain superfamily||STAT transcription factor, coiled coil||Transcription factor STAT||SH2 domain superfamily||STAT transcription factor, DNA-binding, N-terminal||STAT transcription factor, all-alpha domain||STAT transcription factor, protein interaction||STAT transcription factor, DNA-binding||SH2 domain||STAT5a/5b||p53-like transcription factor, DNA-binding
ENSMUSG00000004044	2348.76	1043.53	1.1704	5.0653e-05	0.000737	Cavin1	Caveolae-associated protein 1||Cavin family
ENSMUSG00000004056	4517.19	3611.2	0.32295	0.00010142	0.0013791	Akt2	Protein kinase, ATP binding site||Protein kinase domain||Protein kinase-like domain superfamily||Protein kinase, C-terminal||PH-like domain superfamily||AGC-kinase, C-terminal||Protein Kinase B beta, catalytic domain||Serine/threonine-protein kinase, active site||Pleckstrin homology domain
ENSMUSG00000004098	1176.47	607.614	0.95324	1.4755e-18	1.0814e-16	Col5a3	Fibrillar collagen, C-terminal||Concanavalin A-like lectin/glucanase domain superfamily||Collagen triple helix repeat||Insect cysteine-rich antifreeze protein||Laminin G domain
ENSMUSG00000004100	1253.47	713.931	0.81207	4.7182e-12	1.9649e-10	Ppan	-||Brix domain||Anticodon-binding domain superfamily
ENSMUSG00000004187	7481.74	10855.6	-0.53699	8.5492e-07	1.8057e-05	Kifc2	Kinesin motor domain, conserved site||P-loop containing nucleoside triphosphate hydrolase||-||Kinesin motor domain||Kinesin-like protein||Kinesin motor domain superfamily
ENSMUSG00000004268	1387.29	1039.86	0.41589	3.4712e-05	0.00052305	Emg1	Alpha/beta knot methyltransferases||Ribosomal biogenesis, methyltransferase, EMG1/NEP1
ENSMUSG00000004328	1018.57	318.731	1.6761	1.7461e-33	2.8699e-31	Hif3a	PAS fold-3||PAS domain superfamily||PAS domain||Myc-type, basic helix-loop-helix (bHLH) domain||Hypoxia-inducible factor, alpha subunit||PAS fold||Helix-loop-helix DNA-binding domain superfamily
ENSMUSG00000004356	1684.94	965.766	0.80295	2.2973e-13	1.116e-11	Utp20	Armadillo-like helical||Armadillo-type fold||Down-regulated-in-metastasis protein||-
ENSMUSG00000004360	1641.92	1287.71	0.35057	0.00034045	0.0040431	9330159F19Rik	-||Domain of unknown function DUF4482
ENSMUSG00000004364	4533.51	3794.35	0.25678	0.0024976	0.02226	Cul3	Winged helix-like DNA-binding domain superfamily||Winged helix DNA-binding domain superfamily||Cullin repeat-like-containing domain superfamily||Cullin homology domain||-||Cullin homology domain superfamily||Cullin protein, neddylation domain||Cullin, conserved site||Cullin, N-terminal
ENSMUSG00000004371	503.177	34.7513	3.8559	6.1681e-05	0.00087564	Il11	Four-helical cytokine-like, core||Interleukin-11||Interleukin-11, mammalian
ENSMUSG00000004393	1695.77	1263.66	0.42433	8.65e-06	0.00014927	Ddx56	Helicase, C-terminal||Helicase superfamily 1/2, ATP-binding domain||DEAD/DEAH box helicase domain||P-loop containing nucleoside triphosphate hydrolase||RNA helicase, DEAD-box type, Q motif
ENSMUSG00000004451	1645.99	1178.02	0.48258	9.1933e-07	1.9321e-05	Ralb	Small GTPase superfamily, Ras type||Ras-related protein Ral||P-loop containing nucleoside triphosphate hydrolase||Small GTPase superfamily||Small GTP-binding protein domain
ENSMUSG00000004460	2382.97	1859.47	0.35787	5.5993e-05	0.0008033	Dnajb11	DnaJ domain superfamily||DnaJ domain, conserved site||Chaperone DnaJ, C-terminal||HSP40/DnaJ peptide-binding||DnaJ domain
ENSMUSG00000004561	645.924	849.614	-0.39544	0.0006056	0.00661	Mettl17	S-adenosyl-L-methionine-dependent methyltransferase||Ribosomal protein Rsm22-like||-
ENSMUSG00000004565	4292.58	5799.64	-0.43412	6.5313e-06	0.00011534	Pnpla6	Cytochrome c1, transmembrane anchor, C-terminal||Lysophospholipase patatin, conserved site||-||Acyl transferase/acyl hydrolase/lysophospholipase||RmlC-like jelly roll fold||Patatin-like phospholipase domain||Cyclic nucleotide-binding domain||Cyclic nucleotide-binding-like
ENSMUSG00000004567	2750.55	3409.76	-0.30995	0.00041255	0.0047592	Mcoln1	Polycystin cation channel, PKD1/PKD2||-
ENSMUSG00000004591	1238.23	978.676	0.33937	0.0008548	0.008897	Pkn2	C2 domain||Protein kinase, C-terminal||Protein kinase domain||-||Protein kinase, ATP binding site||Protein kinase-like domain superfamily||Serine/threonine-protein kinase N, first HR1 domain||C2 domain superfamily||Serine/threonine-protein kinase, active site||HR1 repeat superfamily||AGC-kinase, C-terminal||HR1 rho-binding domain
ENSMUSG00000004609	546.451	250.486	1.1254	4.1748e-12	1.7516e-10	Cd33	Immunoglobulin V-set domain||Immunoglobulin subtype||Immunoglobulin-like fold||Immunoglobulin-like domain||Immunoglobulin-like domain superfamily||Immunoglobulin
ENSMUSG00000004633	672.914	1257.66	-0.90225	5.2679e-17	3.4701e-15	Chn2	Rho GTPase activation protein||Diacylglycerol/phorbol-ester binding||-||Protein kinase C-like, phorbol ester/diacylglycerol-binding domain||SH2 domain||Chimaerin||Chimaerin, SH2 domain||SH2 domain superfamily||Rho GTPase-activating protein domain
ENSMUSG00000004655	89.7087	20.8525	2.105	0.0010764	0.010863	Aqp1	Aquaporin-like||Major intrinsic protein, conserved site||Aquaporin 1||Aquaporin transporter||Major intrinsic protein
ENSMUSG00000004665	618.34	342.365	0.85286	1.1138e-07	2.7307e-06	Cnn2	Calponin repeat||Smooth muscle protein/calponin||Calponin/LIMCH1||Calponin-like domain superfamily||Calponin-2||Calponin homology domain
ENSMUSG00000004677	3818.22	2998.41	0.3487	0.00027154	0.0033036	Myo9b	Rho GTPase-activating protein domain||P-loop containing nucleoside triphosphate hydrolase||IQ motif, EF-hand binding site||Protein kinase C-like, phorbol ester/diacylglycerol-binding domain||Unconventional myosin-IXb||Rho GTPase activation protein||Ras-associating (RA) domain||Ubiquitin-like domain superfamily||Class IX myosin, motor domain||Myosin head, motor domain
ENSMUSG00000004698	690.13	875.732	-0.34362	0.0017942	0.01673	Hdac9	Histone deacetylase domain superfamily||Histone deacetylase, glutamine rich N-terminal domain||Histone deacetylase domain||Histone deacetylase superfamily||Ureohydrolase domain superfamily||-||Histone deacetylase class II, eukaryotic||WD40/YVTN repeat-like-containing domain superfamily
ENSMUSG00000004709	83.9149	2.55391	5.0381	2.5642e-12	1.1004e-10	Cd244	Natural killer cell receptor 2B4, immunoglobulin domain||Immunoglobulin-like fold||Natural killer cell receptor 2B4||Immunoglobulin-like domain superfamily||-
ENSMUSG00000004791	805.019	522.207	0.6244	9.9906e-06	0.00016998	Pgf	Cystine-knot cytokine||PDGF/VEGF domain||Platelet-derived growth factor, conserved site
ENSMUSG00000004815	1371.57	1902.79	-0.47228	2.5621e-06	4.9149e-05	Dgkq	Protein kinase C-like, phorbol ester/diacylglycerol-binding domain||Diacylglycerol kinase, catalytic domain||Ubiquitin-like domain superfamily||Ras-associating (RA) domain||Inorganic polyphosphate/ATP-NAD kinase, N-terminal||Diacylglycerol/phorbol-ester binding||NAD kinase/diacylglycerol kinase-like domain superfamily||-||Diacylglycerol kinase, accessory domain
ENSMUSG00000004837	192.763	118.089	0.70695	0.00037041	0.0043396	Grap	SH2 domain||GRAP, N-terminal SH3 domain||SH3-like domain superfamily||SH3 domain||SH2 domain superfamily
ENSMUSG00000004846	2903.8	2076.8	0.48357	5.684e-07	1.2408e-05	Plod3	Nucleotide-diphospho-sugar transferases||Prolyl 4-hydroxylase, alpha subunit||Procollagen-lysine 5-dioxygenase||Oxoglutarate/iron-dependent dioxygenase
ENSMUSG00000004891	3413.6	431.871	2.9826	1.0933e-41	2.4193e-39	Nes	Nestin||Intermediate filament protein||Intermediate filament protein, conserved site
ENSMUSG00000004892	14214.5	21751.7	-0.61377	6.3235e-11	2.3605e-09	Bcan	EGF-like, conserved site||Immunoglobulin-like fold||Sushi/SCR/CCP superfamily||C-type lectin, conserved site||Immunoglobulin V-set domain||Immunoglobulin/major histocompatibility complex, conserved site||EGF-like domain||Sushi/SCR/CCP domain||Immunoglobulin-like domain superfamily||C-type lectin-like/link domain superfamily||-||C-type lectin-like||Immunoglobulin subtype||EGF-like calcium-binding …
ENSMUSG00000004894	13765.3	9606.48	0.51896	9.4547e-06	0.000162	Hapln2	Link domain||Immunoglobulin-like domain superfamily||Immunoglobulin-like fold||Immunoglobulin subtype 2||Immunoglobulin V-set domain||Immunoglobulin subtype||-||Immunoglobulin-like domain||C-type lectin fold||C-type lectin-like/link domain superfamily
ENSMUSG00000004902	2579.45	3182.68	-0.30318	0.00040077	0.0046415	Slc25a18	Mitochondrial carrier domain superfamily||Mitochondrial substrate/solute carrier||Mitochondrial carrier protein
ENSMUSG00000004929	2090.76	1679.76	0.31578	0.00046407	0.0052618	Thop1	Peptidase M3A/M3B catalytic domain||Neurolysin/Thimet oligopeptidase, N-terminal
ENSMUSG00000004933	2185.98	2878.82	-0.39719	0.00027277	0.0033173	Matk	Protein kinase, ATP binding site||-||Tyrosine-protein kinase, catalytic domain||Protein kinase domain||Protein kinase-like domain superfamily||SH3 domain||Serine-threonine/tyrosine-protein kinase, catalytic domain||SH3-like domain superfamily||Tyrosine-protein kinase, active site||SH2 domain superfamily||CSK-like, SH2 domain||SH2 domain
ENSMUSG00000004947	648.193	433.033	0.58195	1.9071e-06	3.7432e-05	Dtx2	Zinc finger, C3HC4 RING-type||WWE domain||Zinc finger, RING-type||-||WWE domain superfamily||Zinc finger, RING/FYVE/PHD-type||WWE domain, subgroup
ENSMUSG00000004951	29813.6	1687.37	4.1431	0	0	Hspb1	HSP20-like chaperone||Alpha crystallin/Heat shock protein||Small heat shock protein HSP20||Alpha crystallin/Hsp20 domain
ENSMUSG00000005054	1939.3	1095.77	0.82359	7.4226e-15	4.0997e-13	Cstb	Proteinase inhibitor I25A, stefin||Cystatin domain||Proteinase inhibitor I25, cystatin, conserved site
ENSMUSG00000005057	1230.61	451.348	1.4471	3.1133e-30	4.4104e-28	Sh2b2	SH2B adapter protein||SH2B adapter protein 2||Phenylalanine zipper||Phenylalanine zipper superfamily||Pleckstrin homology domain||SH2 domain||PH-like domain superfamily||SH2B2, SH2 domain||SH2 domain superfamily
ENSMUSG00000005069	2207.85	1725.78	0.35539	8.713e-05	0.0012056	Pex5	Peroxisomal targeting signal 1 receptor||Peroxisomal targeting signal 1 receptor family||Tetratricopeptide repeat||Tetratricopeptide repeat-containing domain||Mitochondrial outer membrane translocase complex, Tom20 domain superfamily||Tetratricopeptide-like helical domain superfamily
ENSMUSG00000005087	3960.19	538.429	2.8787	2.0118e-71	1.0643e-68	Cd44	C-type lectin fold||C-type lectin-like/link domain superfamily||Link domain||CD44 antigen
ENSMUSG00000005103	7592.25	5859.74	0.37369	3.086e-06	5.8405e-05	Wdr1	WD40-repeat-containing domain||G-protein beta WD-40 repeat||WD40/YVTN repeat-like-containing domain superfamily||WD40 repeat, conserved site||WD40 repeat||WD40-repeat-containing domain superfamily||Nitrous oxide reductase, N-terminal
ENSMUSG00000005124	133.365	57.7873	1.2066	0.00047312	0.0053486	Wisp1	Cystine knot, C-terminal||Growth factor receptor cysteine-rich domain superfamily||-||Insulin-like growth factor-binding protein, IGFBP||Glycoprotein hormone subunit beta||VWFC domain||Thrombospondin type-1 (TSP1) repeat superfamily||IGFBP-related, CNN||Thrombospondin type-1 (TSP1) repeat||Insulin-like growth factor binding protein, N-terminal, Cys-rich conserved site
ENSMUSG00000005142	1601.16	2161.84	-0.43314	3.8062e-06	7.1002e-05	Man2b1	Glycoside hydrolase 38/57, N-terminal||Galactose mutarotase-like domain superfamily||Glycoside hydrolase/deacetylase, beta/alpha-barrel||Glycoside hydrolase family 38, N-terminal domain||Glycoside hydrolase family 38, central domain||-||Glycoside hydrolase families 57/38, central domain superfamily||Glycosyl hydrolase family 38, C-terminal||Glycoside hydrolase family 38, central domain superfamily
ENSMUSG00000005150	963.152	1194.53	-0.31061	0.0025981	0.02295	Wdr83	WD40 repeat, conserved site||WD40 repeat||WD40-repeat-containing domain superfamily||-||WD40-repeat-containing domain||G-protein beta WD-40 repeat||WD40/YVTN repeat-like-containing domain superfamily
ENSMUSG00000005198	3840.66	3124.61	0.29768	0.0024475	0.021915	Polr2a	RNA polymerase Rpb1, domain 5||RNA polymerase II, heptapeptide repeat, eukaryotic||RNA polymerase, alpha subunit||RNA polymerase Rpb1, domain 6||RNA polymerase Rpb1, domain 4||RNA polymerase, N-terminal||RNA polymerase Rpb1, domain 1||RNA polymerase Rpb1, domain 3||RNA polymerase Rpb1, domain 7
ENSMUSG00000005237	140.693	202.041	-0.52209	0.0052892	0.041851	Dnah2	Dynein heavy chain, domain-2||Dynein heavy chain||Dynein heavy chain, ATP-binding dynein motor region D5||P-loop containing nucleoside triphosphate hydrolase||Dynein heavy chain, hydrolytic ATP-binding dynein motor region D1||Dynein heavy chain, AAA module D4||AAA+ ATPase domain||ATPase, dynein-related, AAA domain||Dynein heavy chain, coiled coil stalk||Dynein heavy chain domain||Dynein heavy cha…
ENSMUSG00000005320	75.615	39.3764	0.94134	0.0032631	0.0279	Fgfr4	Immunoglobulin-like domain superfamily||Tyrosine-protein kinase, active site||Fibroblast growth factor receptor family||Immunoglobulin subtype||Immunoglobulin-like fold||Immunoglobulin subtype 2||Immunoglobulin I-set||Serine-threonine/tyrosine-protein kinase, catalytic domain||Protein kinase-like domain superfamily||Immunoglobulin-like domain||Protein kinase domain||Protein kinase, ATP binding si…
ENSMUSG00000005374	1478.81	1156.74	0.35437	0.00023189	0.0028781	Tbl2	-||WD40-repeat-containing domain superfamily||WD40 repeat||WD40 repeat, conserved site||G-protein beta WD-40 repeat||WD40/YVTN repeat-like-containing domain superfamily||WD40-repeat-containing domain
ENSMUSG00000005413	3541.87	271.335	3.7064	1.8736e-35	3.2869e-33	Hmox1	Haem oxygenase-like, multi-helical||Haem oxygenase-like||Haem oxygenase||Haem oxygenase conserved site
ENSMUSG00000005481	938.457	583.793	0.68483	2.989e-09	9.1585e-08	Ddx39	P-loop containing nucleoside triphosphate hydrolase||-||RNA helicase, DEAD-box type, Q motif||Helicase superfamily 1/2, ATP-binding domain||Helicase, C-terminal||DEAD/DEAH box helicase domain
ENSMUSG00000005483	3033.08	2490.95	0.28409	0.0025061	0.022306	Dnajb1	HSP40/DnaJ peptide-binding||DnaJ domain||Chaperone DnaJ, C-terminal||DnaJ domain, conserved site||DnaJ domain superfamily
ENSMUSG00000005514	7015.78	4128.19	0.76509	4.1918e-21	3.6673e-19	Por	Flavoprotein-like superfamily||Ferredoxin reductase-type FAD-binding domain||NADPH-cytochrome P450 reductase||Flavodoxin/nitric oxide synthase||Riboflavin synthase-like beta-barrel||FAD-binding, type 1||Flavodoxin-like||Flavoprotein pyridine nucleotide cytochrome reductase||Oxidoreductase FAD/NAD(P)-binding
ENSMUSG00000005533	3141.41	2394.76	0.39153	0.00098423	0.010046	Igf1r	Protein kinase domain||Protein kinase, ATP binding site||Receptor L-domain||Protein kinase-like domain superfamily||Tyrosine-protein kinase, receptor class II, conserved site||Furin-like repeat||Fibronectin type III superfamily||Tyrosine-protein kinase, active site||Tyrosine-protein kinase, insulin-like receptor||Furin-like cysteine-rich domain||Receptor L-domain superfamily||Growth factor recept…
ENSMUSG00000005610	25847.8	20951.4	0.303	9.6003e-05	0.0013141	Eif4g2	Initiation factor eIF-4 gamma, MA3||-||MIF4G-like, type 3||W2 domain||Armadillo-type fold
ENSMUSG00000005667	1714.98	1071.68	0.67832	9.2784e-11	3.3962e-09	Mthfd2	Tetrahydrofolate dehydrogenase/cyclohydrolase, NAD(P)-binding domain||Tetrahydrofolate dehydrogenase/cyclohydrolase, catalytic domain||NAD(P)-binding domain superfamily||Tetrahydrofolate dehydrogenase/cyclohydrolase, conserved site||Tetrahydrofolate dehydrogenase/cyclohydrolase||-
ENSMUSG00000005672	1349.94	987.379	0.45122	0.0028848	0.025083	Kit	Tyrosine-protein kinase, receptor class III, conserved site||Protein kinase domain||Tyrosine-protein kinase, catalytic domain||Protein kinase, ATP binding site||Protein kinase-like domain superfamily||Serine-threonine/tyrosine-protein kinase, catalytic domain||Immunoglobulin-like domain||Mast/stem cell growth factor receptor||Immunoglobulin subtype 2||Immunoglobulin-like fold||Immunoglobulin subt…
ENSMUSG00000005686	2890.53	1079.16	1.4214	4.6654e-52	1.5336e-49	Ampd3	AMP deaminase 3||Adenosine/AMP deaminase domain||Metal-dependent hydrolase||AMP deaminase||Adenosine/AMP deaminase active site
ENSMUSG00000005774	969.953	1406.38	-0.53599	1.2535e-07	3.049e-06	Rfx5	-||RFX5, C-terminal||DNA-binding RFX-type winged-helix domain||DNA-binding protein RFX5||Winged helix DNA-binding domain superfamily||Winged helix-like DNA-binding domain superfamily
ENSMUSG00000005800	345.672	17.3346	4.3177	8.9747e-09	2.5994e-07	Mmp8	Hemopexin, conserved site||Peptidase M10, metallopeptidase||Hemopexin-like domain||Peptidase, metallopeptidase||Hemopexin-like domain superfamily||Neutrophil collagenase||Peptidase M10A, cysteine switch, zinc binding site||Peptidoglycan binding-like||Peptidase M10A, catalytic domain||Metallopeptidase, catalytic domain superfamily||PGBD-like superfamily||Peptidase M10A||Hemopexin-like repeats
ENSMUSG00000005824	39.3486	0.958189	5.3599	3.2549e-10	1.12e-08	Tnfsf14	Tumour necrosis factor||Tumour necrosis factor domain||Tumour necrosis factor-like domain superfamily
ENSMUSG00000005846	2158.57	1382.32	0.64299	7.6011e-12	3.097e-10	Rsl1d1	-||Ribosomal protein L1, 3-layer alpha/beta-sandwich||Ribosomal protein L1/ribosomal biogenesis protein||Ribosomal protein L1-like
ENSMUSG00000005886	3548.5	2890.7	0.29579	0.00064957	0.0070311	Ncoa2	Nuclear receptor coactivator, Ncoa-type, interlocking domain superfamily||PAS fold||Nuclear receptor coactivator||Helix-loop-helix DNA-binding domain superfamily||Domain of unknown function DUF1518||Nuclear receptor coactivator, Ncoa-type, interlocking||PAS domain||Myc-type, basic helix-loop-helix (bHLH) domain||Nuclear receptor coactivator, interlocking||Nuclear receptor coactivator, receptor-bi…
ENSMUSG00000005899	1018.99	1311.77	-0.36437	0.0003615	0.0042558	Smpd4	Sphingomyelin phosphodiesterase 4
ENSMUSG00000005936	3064.76	2590.68	0.24245	0.0056941	0.04435	Kctd20	BTB/POZ domain||SKP1/BTB/POZ domain superfamily
ENSMUSG00000005980	143.549	210.835	-0.55456	0.0031018	0.026695	Dnase1	Deoxyribonuclease I, conservied site||Endonuclease/exonuclease/phosphatase superfamily||Deoxyribonuclease I, active site||Deoxyribonuclease I||Endonuclease/exonuclease/phosphatase||-
ENSMUSG00000005986	2278.62	2895.52	-0.34566	8.0982e-05	0.0011251	Ankrd13d	-||Ankyrin repeat domain-containing protein 13||Ankyrin repeat-containing domain||Ankyrin repeat||Ubiquitin interacting motif||Ankyrin repeat-containing domain superfamily
ENSMUSG00000006005	4770.15	3974.12	0.2634	0.0016894	0.015897	Tpr	-||Nucleoprotein TPR/MLP1
ENSMUSG00000006014	2277.96	175.374	3.6992	1.3956e-05	0.00023004	Prg4	Somatomedin B-like domain superfamily||Hemopexin-like repeats||Somatomedin B, chordata||Hemopexin-like domain superfamily||Somatomedin B domain||Hemopexin-like domain||Hemopexin, conserved site
ENSMUSG00000006050	4045.98	3241.55	0.31981	0.00014908	0.0019399	Sra1	PH-like domain superfamily||WW domain||Steroid receptor RNA activator-protein/coat protein complex II, Sec31||-||PTB/PI domain||WW domain superfamily
ENSMUSG00000006169	3466.05	2607.55	0.41059	2.3134e-06	4.4656e-05	Clint1	Clathrin interactor 1||ENTH/VHS||ENTH domain
ENSMUSG00000006205	14283.1	9670.03	0.56271	1.1556e-12	5.1894e-11	Htra1	PDZ superfamily||Peptidase S1C||Growth factor receptor cysteine-rich domain superfamily||Insulin-like growth factor-binding protein, IGFBP||PDZ domain||Kazal domain superfamily||Kazal domain||Peptidase S1, PA clan
ENSMUSG00000006218	717.043	989.015	-0.46393	2.5251e-05	0.00039362	Fam131c	Protein FAM131
ENSMUSG00000006219	396.684	164.675	1.2684	3.0053e-15	1.7246e-13	Fblim1	Zinc finger, LIM-type||-
ENSMUSG00000006221	95.3943	18.3563	2.3776	1.9804e-06	3.8647e-05	Hspb7	HSP20-like chaperone||Alpha crystallin/Heat shock protein||Small heat shock protein HSP20||Alpha crystallin/Hsp20 domain
ENSMUSG00000006301	6059.25	3085.56	0.97361	5.2105e-31	7.5391e-29	Tmbim1	Bax inhibitor 1-related||-
ENSMUSG00000006304	5779.97	4627.53	0.32082	0.000113	0.0015182	Arpc2	Actin-related protein 2/3 complex subunit 2||-||Arp2/3 complex subunit 2/4
ENSMUSG00000006333	12069.3	9435.48	0.35517	6.6163e-06	0.00011655	Rps9	Ribosomal protein S4/S9, N-terminal||RNA-binding S4 domain||Ribosomal protein S4, conserved site||Ribosomal protein S4/S9||-||Ribosomal protein S4/S9, eukaryotic/archaeal||RNA-binding S4 domain superfamily
ENSMUSG00000006342	3412.88	4394.44	-0.36469	0.00074944	0.0079569	Susd2	von Willebrand factor, type D domain||Somatomedin B domain||Somatomedin B-like domain superfamily||Sushi/SCR/CCP domain||Sushi/SCR/CCP superfamily||AMOP domain
ENSMUSG00000006344	333.739	176.534	0.91877	0.00060865	0.0066412	Ggt5	Nucleophile aminohydrolases, N-terminal||Gamma-glutamyltranspeptidase||-
ENSMUSG00000006356	2145.53	1354.94	0.6631	1.8413e-12	8.0547e-11	Crip2	Zinc finger, LIM-type
ENSMUSG00000006390	2949.02	1837.1	0.68281	9.0488e-12	3.6736e-10	Elovl1	ELO family, conserved site||Elongation of very long chain fatty acids protein 1||ELO family
ENSMUSG00000006392	861.353	666.004	0.37107	0.00081189	0.0085211	Med8	Mediator complex, subunit Med8, fungi/metazoa||-
ENSMUSG00000006403	7066.75	5648.44	0.3232	0.0022906	0.020725	Adamts4	Thrombospondin type-1 (TSP1) repeat superfamily||Peptidase M12B, ADAM/reprolysin||Peptidase M12B, ADAM-TS||ADAM, cysteine-rich||Thrombospondin type-1 (TSP1) repeat||Metallopeptidase, catalytic domain superfamily||ADAM-TS Spacer 1||Peptidase M12B, propeptide
ENSMUSG00000006411	659.085	881.208	-0.41902	0.00014365	0.0018801	Nectin4	Nectin-4||Immunoglobulin-like domain||Immunoglobulin-like fold||Immunoglobulin subtype 2||CD80-like, immunoglobulin C2-set||Immunoglobulin V-set domain||Immunoglobulin subtype||Immunoglobulin-like domain superfamily
ENSMUSG00000006442	3481.92	2621.31	0.40959	1.8073e-05	0.00029125	Srm	Spermidine/spermine synthase, eukaryotes||Polyamine biosynthesis domain||Spermidine/spermine synthases||Spermidine synthase, tetramerisation domain||S-adenosyl-L-methionine-dependent methyltransferase||Polyamine biosynthesis domain, conserved site||Spermidine synthase, tetramerisation domain superfamily
ENSMUSG00000006445	571.413	61.7608	3.2098	1.2019e-11	4.7765e-10	Epha2	Immunoglobulin-like fold||Fibronectin type III||Tyrosine-protein kinase ephrin type A/B receptor-like||Ephrin receptor type-A /type-B||Ephrin type-A receptor 2, ligand binding domain||Ephrin receptor, transmembrane domain||Tyrosine-protein kinase, catalytic domain||Growth factor receptor cysteine-rich domain superfamily||Galactose-binding-like domain superfamily||Serine-threonine/tyrosine-protein…
ENSMUSG00000006456	673.57	484.501	0.47533	0.00010037	0.0013675	Rbm14	RNA recognition motif domain||RBM14, RNA recognition motif 2||RNA-binding domain superfamily||RBM14, RNA recognition motif 1
ENSMUSG00000006469	77.5983	173.074	-1.1573	2.3431e-07	5.46e-06	Slc34a3	Sodium-dependent phosphate transport protein||Sodium-dependent phosphate transport protein 2C
ENSMUSG00000006494	1275.18	1533.94	-0.26654	0.0055905	0.04374	Pdk1	Histidine kinase/HSP90-like ATPase superfamily||Alpha-ketoacid/pyruvate dehydrogenase kinase, N-terminal domain superfamily||Histidine kinase/HSP90-like ATPase||Branched-chain alpha-ketoacid dehydrogenase kinase/Pyruvate dehydrogenase kinase, N-terminal||Histidine kinase domain
ENSMUSG00000006498	1931.35	881.184	1.1321	3.3568e-21	2.9521e-19	Ptbp1	Polypyrimidine tract-binding protein1/2/3, RNA recognition motif 2||RNA-binding domain superfamily||PTBP1, RNA recognition motif 1||-||HnRNP-L/PTB||RNA recognition motif domain||PTBP1, RNA recognition motif 3
ENSMUSG00000006517	1997.38	2432.65	-0.28442	0.0023661	0.021306	Mvd	Ribosomal protein S5 domain 2-type fold||GHMP kinase, C-terminal domain superfamily||-||Diphosphomevalonate/phosphomevalonate decarboxylase||GHMP kinase N-terminal domain||Diphosphomevalonate decarboxylase||Ribosomal protein S5 domain 2-type fold, subgroup
ENSMUSG00000006519	558.538	249.85	1.1606	3.0967e-05	0.00047357	Cyba	Cytochrome b558 alpha-subunit
ENSMUSG00000006576	7041.43	9240.9	-0.39217	0.00065902	0.0071196	Slc4a3	-||Anion exchange, conserved site||Bicarbonate transporter, C-terminal||Phosphotransferase/anion transporter||Band 3 cytoplasmic domain||Anion exchange protein 3||Anion exchange protein||Bicarbonate transporter, eukaryotic
ENSMUSG00000006599	1308.36	1053.41	0.3127	0.0019399	0.017887	Gtf2h1	BSD domain||BSD domain superfamily||TFIIH subunit Tfb1/p62||PH-like domain superfamily||-||TFIIH p62 subunit, N-terminal
ENSMUSG00000006611	594.406	401.745	0.56517	8.744e-05	0.0012094	Hfe	MHC class I-like antigen recognition-like superfamily||Immunoglobulin-like fold||Immunoglobulin C1-set||Immunoglobulin/major histocompatibility complex, conserved site||MHC classes I/II-like antigen recognition protein||MHC class I-like antigen recognition-like||Hereditary hemochromatosis protein||Immunoglobulin-like domain superfamily||MHC class I alpha chain, alpha1 alpha2 domains||-||Immunoglo…
ENSMUSG00000006642	69.5362	12.1553	2.5162	2.8459e-09	8.7438e-08	Tcf23	Helix-loop-helix DNA-binding domain superfamily||Myc-type, basic helix-loop-helix (bHLH) domain
ENSMUSG00000006651	88108.9	102509	-0.21839	0.0044497	0.036215	Aplp1	Beta-amyloid precursor protein C-terminal||Amyloidogenic glycoprotein, heparin-binding||Amyloidogenic glycoprotein, extracellular||Amyloidogenic glycoprotein||E2 domain superfamily||Amyloidogenic glycoprotein, E2 domain||Amyloidogenic glycoprotein, copper-binding||Amyloidogenic glycoprotein, intracellular domain, conserved site||Amyloidogenic glycoprotein, heparin-binding domain superfamily||Amyl…
ENSMUSG00000006705	1049.03	742.926	0.49777	3.5364e-06	6.6484e-05	Pknox1	Homeobox KN domain||Homeobox protein PKNOX/Meis, N-terminal||Homeobox domain||Homeobox-like domain superfamily
ENSMUSG00000006728	1825.3	1533.12	0.25166	0.0059572	0.046029	Cdk4	Protein kinase, ATP binding site||-||Protein kinase domain||Protein kinase-like domain superfamily||Serine/threonine-protein kinase, active site
ENSMUSG00000006732	714.795	526.404	0.44136	0.00014138	0.001854	Mettl1	S-adenosyl-L-methionine-dependent methyltransferase||tRNA (guanine-N-7) methyltransferase catalytic subunit Trm8, eukaryote||-||tRNA (guanine-N-7) methyltransferase, Trmb type
ENSMUSG00000006782	44774.6	59289	-0.40508	0.0042806	0.035059	Cnp	P-loop containing nucleoside triphosphate hydrolase||Cyclic phosphodiesterase||Cyclic nucleotide phosphodiesterase
ENSMUSG00000006800	12253.5	8066.93	0.6031	1.6839e-14	9.0069e-13	Sulf2	Sulfatase, conserved site||Alkaline phosphatase-like, alpha/beta/alpha||Extracellular sulfatase||Sulfatase, N-terminal||Extracellular sulfatase, C-terminal||Alkaline-phosphatase-like, core domain superfamily||-
ENSMUSG00000006931	1015.44	1423.54	-0.48737	1.743e-06	3.4589e-05	P3h4	Tetratricopeptide-like helical domain superfamily||Endoplasmic reticulum protein SC65
ENSMUSG00000006958	329.404	705.354	-1.0985	1.1521e-13	5.6946e-12	Chrd	VWFC domain||CHRD||-||Chordin
ENSMUSG00000007030	944.637	1350.83	-0.51601	1.7722e-05	0.00028628	Vwa7	von Willebrand factor A-like domain superfamily
ENSMUSG00000007036	4224.47	5008.59	-0.24563	0.0033559	0.028613	Abhd16a	Alpha/beta hydrolase fold-1||-||Alpha/Beta hydrolase fold||Abhydrolase domain-containing protein 16A
ENSMUSG00000007041	1644.5	402.195	2.0317	6.1099e-13	2.8495e-11	Clic1	Glutathione S-transferase, C-terminal domain superfamily||Glutathione S-transferase, C-terminal-like||Thioredoxin-like superfamily||Intracellular chloride channel||Chloride intracellular channel protein 1||Glutathione S-transferase, N-terminal
ENSMUSG00000007050	256.798	169.345	0.60067	0.00069942	0.0075011	Lsm2	U6 snRNA-associated Sm-like protein LSm2||LSM domain superfamily||LSM domain, eukaryotic/archaea-type
ENSMUSG00000007411	2884.17	2201.47	0.38969	9.9375e-06	0.00016925	Mark3	Ubiquitin-associated domain||Serine/threonine-protein kinase MARK/par1||Serine/threonine-protein kinase MARK3||Serine/threonine-protein kinase, active site||KA1 domain/Ssp2, C-terminal||Protein kinase-like domain superfamily||Protein kinase, ATP binding site||-||Protein kinase domain||Kinase associated domain 1 (KA1)
ENSMUSG00000007476	1268.29	579.108	1.131	2.508e-25	2.7933e-23	Lrrc8a	Leucine-rich repeat domain superfamily||Leucine-rich repeat, typical subtype||LRRC8, pannexin-like TM region||Leucine-rich repeat
ENSMUSG00000007480	44.3532	157.055	-1.8242	0.00021653	0.0027043	Mc5r	Melanocortin receptor||G protein-coupled receptor, rhodopsin-like||GPCR, rhodopsin-like, 7TM||Melanocortin/ACTH receptor||Melanocortin 5 receptor
ENSMUSG00000007589	1016.36	799.846	0.34562	0.0012175	0.01205	Tinf2	-||TERF1-interacting nuclear factor 2, N-terminal domain
ENSMUSG00000007603	2964.56	4120.6	-0.47503	0.00073617	0.0078382	Dus3l	Aldolase-type TIM barrel||tRNA-dihydrouridine synthase, conserved site||tRNA-dihydrouridine synthase||Zinc finger, CCCH-type superfamily||DUS-like, FMN-binding domain||Zinc finger, CCCH-type
ENSMUSG00000007613	870.693	1139.77	-0.38851	0.0038232	0.031884	Tgfbr1	Activin types I and II receptor domain||Serine/threonine-protein kinase, active site||GS domain||Ser/Thr protein kinase, TGFB receptor||Protein kinase-like domain superfamily||Protein kinase, ATP binding site||Protein kinase domain
ENSMUSG00000007617	1447.76	919.982	0.65414	1.1611e-10	4.2135e-09	Homer1	Testis-specific protein TEX28/transmembrane and coiled-coil domains protein||-||PH-like domain superfamily||WH1/EVH1 domain
ENSMUSG00000007653	1086.09	1420.87	-0.38764	7.1926e-05	0.0010088	Gabrb2	Gamma-aminobutyric-acid A receptor, beta subunit||Neurotransmitter-gated ion-channel transmembrane domain superfamily||Gamma-aminobutyric acid A receptor/Glycine receptor alpha||Neurotransmitter-gated ion-channel ligand-binding domain||Neurotransmitter-gated ion-channel, conserved site||Neurotransmitter-gated ion-channel transmembrane domain||Neurotransmitter-gated ion-channel||Neurotransmitter-g…
ENSMUSG00000007659	8262.56	4835.76	0.77285	3.1611e-20	2.6427e-18	Bcl2l1	Apoptosis regulator, Bcl-2, BH4 motif, conserved site||Blc2 family||Apoptosis regulator, Bcl-2, BH1 motif, conserved site||Blc2-like superfamily||Bcl2-like||Apoptosis regulator, Bcl-2, BH2 motif, conserved site||Apoptosis regulator, Bcl-2, BH3 motif, conserved site||Apoptosis regulator, Bcl-X||Apoptosis regulator, Bcl-2 protein, BH4||Apoptosis regulator, Bcl-2/ BclX
ENSMUSG00000007682	2273.85	664.04	1.7758	9.0871e-12	3.6847e-10	Dio2	Iodothyronine deiodinase, active site||Iodothyronine deiodinase||Thioredoxin-like superfamily
ENSMUSG00000007739	4111.46	3327.93	0.30503	0.00041871	0.0048187	Cct4	T-complex protein 1, delta subunit||Chaperonin TCP-1, conserved site||GroEL-like apical domain superfamily||Chaperonin Cpn60/TCP-1 family||Chaperone tailless complex polypeptide 1 (TCP-1)||TCP-1-like chaperonin intermediate domain superfamily||-||Chaperonin Cpn60/TCP-1 domain superfamily||GroEL-like equatorial domain superfamily
ENSMUSG00000007783	1741.54	2256.43	-0.37368	6.804e-05	0.00095779	Cpt1c	Acyltransferase ChoActase/COT/CPT||Carnitine O-palmitoyltransferase, N-terminal
ENSMUSG00000007812	1361.19	1010.85	0.4293	2.9111e-05	0.00044823	Zfp655	Krueppel-associated box||KRAB domain superfamily||Zinc finger C2H2 superfamily||-||Zinc finger C2H2-type
ENSMUSG00000007815	6448.91	5072.56	0.34634	1.5711e-05	0.00025636	Rhoa	Small GTPase superfamily, Rho type||P-loop containing nucleoside triphosphate hydrolase||Small GTPase superfamily||Small GTP-binding protein domain
ENSMUSG00000007817	6517.42	4888.82	0.41481	2.8661e-07	6.5524e-06	Zmiz1	Zinc finger, RING/FYVE/PHD-type||Zinc finger, MIZ-type
ENSMUSG00000007836	11394.6	9715.14	0.23004	0.00269	0.023638	Hnrnpa0	hnRNP A0, RNA recognition motif 1||RNA recognition motif domain||RNA-binding domain superfamily
ENSMUSG00000007872	2462	1161.04	1.0844	2.8882e-08	7.7548e-07	Id3	Myc-type, basic helix-loop-helix (bHLH) domain||Helix-loop-helix DNA-binding domain superfamily||DNA-binding protein inhibitor
ENSMUSG00000007888	93.8409	22.4605	2.0628	1.2246e-09	3.9151e-08	Crlf1	Immunoglobulin-like fold||Growth hormone/erythropoietin receptor, ligand binding||Fibronectin type III||Fibronectin type III superfamily||Immunoglobulin-like domain superfamily
ENSMUSG00000007892	15759.4	12593	0.32358	0.0011335	0.011365	Rplp1	Ribosomal protein L12 family
ENSMUSG00000007946	220.032	21.2551	3.3718	2.6384e-37	5.0756e-35	Phox2a	Homeobox domain||Homeobox-like domain superfamily||Homeobox, conserved site
ENSMUSG00000007987	2374.01	2799.25	-0.23771	0.0061799	0.047328	Ift22	P-loop containing nucleoside triphosphate hydrolase
ENSMUSG00000008035	4535.5	8148.05	-0.84519	6.3064e-22	5.7865e-20	Mid1ip1	Spot 14 family
ENSMUSG00000008090	2191.07	1547.71	0.50149	1.789e-05	0.00028858	Fgfrl1	Immunoglobulin subtype 2||Immunoglobulin-like fold||Immunoglobulin subtype||-||Immunoglobulin-like domain||Immunoglobulin I-set||Immunoglobulin-like domain superfamily
ENSMUSG00000008129	40.7879	83.6671	-1.0365	0.00061997	0.0067408	4930432K21Rik	Protein of unknown function DUF4671
ENSMUSG00000008305	2965.34	1949.48	0.60511	9.1284e-12	3.697e-10	Tle1	-||WD40/YVTN repeat-like-containing domain superfamily||WD40-repeat-containing domain||WD40 repeat||Groucho/transducin-like enhancer||WD40 repeat, conserved site||WD40-repeat-containing domain superfamily||Groucho/TLE, N-terminal Q-rich domain
ENSMUSG00000008348	6834.51	5154.01	0.40714	2.0525e-06	3.9871e-05	Ubc	Ubiquitin||Ubiquitin-like domain superfamily||Ubiquitin conserved site||Ubiquitin domain
ENSMUSG00000008384	771.394	189.776	2.0232	6.2858e-17	4.1245e-15	Sertad1	SERTA domain
ENSMUSG00000008393	8478.06	5557.41	0.60932	3.2002e-06	6.0498e-05	Carhsp1	Nucleic acid-binding, OB-fold||Cold-shock conserved site||Cold shock domain||Cold-shock protein, DNA-binding
ENSMUSG00000008398	367.334	187.351	0.97135	9.8615e-10	3.2012e-08	Elk3	Winged helix-like DNA-binding domain superfamily||Ets domain||Winged helix DNA-binding domain superfamily||-
ENSMUSG00000008475	4068.45	2651.62	0.6176	5.7842e-13	2.705e-11	Arpc5	Actin-related protein 2/3 complex subunit 5||Actin-related protein 2/3 complex subunit 5 superfamily
ENSMUSG00000008668	6875.06	5059.79	0.44229	0.00022072	0.0027495	Rps18	Ribosomal protein S13, conserved site||Ribosomal protein S13||30s ribosomal protein S13, C-terminal||Ribosomal protein S13-like, H2TH
ENSMUSG00000008682	7568.67	5940.61	0.34943	0.0013643	0.01327	Rpl10	Ribosomal protein L10e/L16 superfamily||Ribosomal protein L10e/L16||Ribosomal protein L10e, conserved site||Ribosomal protein L10e
ENSMUSG00000008683	6361.55	5431.46	0.22804	0.0065429	0.04957	Rps15a	Ribosomal protein S8||Ribosomal protein S8 superfamily
ENSMUSG00000008730	7307.67	3975.69	0.8782	1.6998e-26	1.9914e-24	Hipk1	Protein kinase-like domain superfamily||Protein kinase domain||-||Protein kinase, ATP binding site||Serine/threonine-protein kinase, active site
ENSMUSG00000008734	16328.4	22807.1	-0.4821	4.1485e-10	1.4088e-08	Gprc5b	GPCR family 3, C-terminal
ENSMUSG00000008855	8111.66	9844.61	-0.27934	0.0032683	0.027937	Hdac5	Histone deacetylase domain superfamily||Histone deacetylase superfamily||Ureohydrolase domain superfamily||Histone deacetylase, glutamine rich N-terminal domain||Histone deacetylase domain||WD40/YVTN repeat-like-containing domain superfamily||Histone deacetylase 5||-||Histone deacetylase class II, eukaryotic
ENSMUSG00000008976	947.532	739.041	0.35852	0.00082182	0.0085986	Gabpa	Winged helix-like DNA-binding domain superfamily||Ubiquitin-like domain superfamily||Pointed domain||Sterile alpha motif/pointed domain superfamily||Winged helix DNA-binding domain superfamily||Ets domain||Transcription factor, GA-binding, alpha subunit||GA-binding protein alpha subunit, N-terminal
ENSMUSG00000009073	7924.17	5252.92	0.59314	2.7045e-13	1.3063e-11	Nf2	-||Ezrin/radixin/moesin, C-terminal||FERM superfamily, second domain||Moesin tail domain superfamily||FERM/acyl-CoA-binding protein superfamily||Ezrin/radixin/moesin-like||Ubiquitin-like domain superfamily||FERM, N-terminal||FERM, C-terminal PH-like domain||Ezrin/radixin/moesin||FERM conserved site||PH-like domain superfamily||FERM central domain||Band 4.1 domain||FERM domain
ENSMUSG00000009097	157.337	63.599	1.3068	3.123e-08	8.3588e-07	Tbx1	Transcription factor, T-box||Transcription factor, T-box, conserved site||p53-like transcription factor, DNA-binding||T-box superfamily
ENSMUSG00000009214	16.7591	3.25965	2.3622	0.0052669	0.041733	Mymk	NGX6/PGAP6/MYMK
ENSMUSG00000009291	5230.06	2710.07	0.9485	2.5831e-29	3.4844e-27	Pttg1ip	PSI domain||-||Cytochrome c1, transmembrane anchor, C-terminal
ENSMUSG00000009293	2267.5	1735.46	0.38579	2.4767e-05	0.00038751	Ube2g2	Ubiquitin-conjugating enzyme, active site||Ubiquitin-conjugating enzyme/RWD-like||-||Ubiquitin-conjugating enzyme E2
ENSMUSG00000009356	654.139	383.455	0.77054	1.0057e-09	3.2586e-08	Lpo	Lactoperoxidase||Haem peroxidase domain superfamily, animal type||Haem peroxidase||Haem peroxidase, animal type
ENSMUSG00000009376	469.009	202.71	1.2102	7.4686e-16	4.5727e-14	Met	Tyrosine-protein kinase, HGF/MSP receptor||Immunoglobulin-like fold||Serine-threonine/tyrosine-protein kinase, catalytic domain||IPT domain||-||Tyrosine-protein kinase, catalytic domain||PSI domain||WD40/YVTN repeat-like-containing domain superfamily||Tyrosine-protein kinase, active site||Sema domain||Protein kinase-like domain superfamily||Sema domain superfamily||Protein kinase domain||Protein …
ENSMUSG00000009470	5663.84	4355.34	0.37899	7.1189e-06	0.00012478	Tnpo1	Importin-beta, N-terminal domain||Armadillo-type fold||Armadillo-like helical
ENSMUSG00000009471	17.2808	0.961976	4.167	6.1109e-05	0.00086935	Myod1	Myc-type, basic helix-loop-helix (bHLH) domain||Myogenic basic muscle-specific protein||Helix-loop-helix DNA-binding domain superfamily||Myogenic determination factor 5
ENSMUSG00000009566	587.813	440.833	0.41513	0.0007157	0.0076502	Fpgs	Mur ligase, C-terminal domain superfamily||Folylpolyglutamate synthetase, conserved site||Folylpolyglutamate synthase, eukaryota||-||Mur-like, catalytic domain superfamily||Folylpolyglutamate synthetase
ENSMUSG00000009569	2364.48	1841.25	0.36084	0.0052289	0.041481	Mkl2	SAP domain superfamily||RPEL repeat||-||SAP domain
ENSMUSG00000009585	337.364	104.91	1.6852	1.4007e-20	1.1857e-18	Apobec3	-||APOBEC/CMP deaminase, zinc-binding||APOBEC-like, N-terminal||Cytidine deaminase-like||Cytidine and deoxycytidylate deaminase domain
ENSMUSG00000009633	662.481	440.029	0.59028	2.0261e-06	3.9425e-05	G0s2	G0/G1 switch protein 2
ENSMUSG00000009681	5405.21	4185.62	0.36891	3.0162e-05	0.00046251	Bcr	PH-like domain superfamily||Rho GTPase-activating protein domain||Guanine-nucleotide dissociation stimulator, CDC24, conserved site||Dbl homology (DH) domain superfamily||C2 domain superfamily||Pleckstrin homology domain||Bcr-Abl oncoprotein oligomerisation||Rho GTPase activation protein||Bcr-Abl oncoprotein oligomerisation domain superfamily||Dbl homology (DH) domain||C2 domain
ENSMUSG00000009687	698.553	176.076	1.9882	1.8618e-06	3.6628e-05	Fxyd5	-||Ion-transport regulator, FXYD motif
ENSMUSG00000009772	219.424	57.4089	1.9344	1.4089e-09	4.4625e-08	Nuak2	Serine/threonine-protein kinase, active site||Protein kinase domain||Protein kinase, ATP binding site||Protein kinase-like domain superfamily
ENSMUSG00000009995	1228.29	1795.45	-0.5477	1.0401e-06	2.1579e-05	Taz	Tafazzin||-||Phospholipid/glycerol acyltransferase
ENSMUSG00000010044	23.1123	51.052	-1.1433	0.0038712	0.032228	Zmynd10	Zinc finger, MYND-type||-||Uncharacterised conserved protein UCP037948, zinc finger MYND-type
ENSMUSG00000010048	521.47	290.027	0.8464	6.6464e-10	2.2171e-08	Ifrd2	-||Armadillo-type fold||Interferon-related developmental regulator, N-terminal||Interferon-related developmental regulator, C-terminal||Armadillo-like helical
ENSMUSG00000010051	423.215	164.563	1.3627	4.7188e-18	3.3147e-16	Hyal1	Aldolase-type TIM barrel||Hyaluronidase||Glycoside hydrolase superfamily
ENSMUSG00000010064	3742.89	4891.34	-0.38608	6.6337e-06	0.0001168	Slc38a3	Amino acid transporter, transmembrane domain||-
ENSMUSG00000010066	4226	5314.4	-0.33061	0.0023578	0.021249	Cacna2d2	Voltage-dependent calcium channel, alpha-2/delta subunit, conserved region||VWA N-terminal||von Willebrand factor, type A||von Willebrand factor A-like domain superfamily
ENSMUSG00000010067	640.329	283.108	1.1775	2.0276e-18	1.4669e-16	Rassf1	Ras-associating (RA) domain||Ras association domain-containing protein 1||SARAH domain||Ubiquitin-like domain superfamily||Protein kinase C-like, phorbol ester/diacylglycerol-binding domain||C-terminal RASSF family||-
ENSMUSG00000010086	3157.24	4993.35	-0.66135	1.2264e-14	6.6438e-13	Rnf112	Zinc finger, C3HC4 RING-type||Zinc finger, RING-type||Guanylate-binding protein, N-terminal||Zinc finger, RING/FYVE/PHD-type||GB1/RHD3-type guanine nucleotide-binding (G) domain||P-loop containing nucleoside triphosphate hydrolase
ENSMUSG00000010095	11238.1	6109.14	0.87936	2.4262e-28	3.1235e-26	Slc3a2	Glycoside hydrolase superfamily||Solute carrier family 3 member 2, N-terminal domain||Glycosyl hydrolase, family 13, catalytic domain
ENSMUSG00000010154	2575.22	3127.43	-0.28028	0.0016373	0.015502	Spire2	Protein Spire2||KIND domain||Zinc finger, RING/FYVE/PHD-type||Protein Spire||Zinc finger, FYVE/PHD-type
ENSMUSG00000010175	2219.51	1621.37	0.45303	0.00081942	0.0085815	Prox1	Prospero homeobox protein 1||Homeobox-like domain superfamily||Homeo-prospero domain||Homeo-prospero domain superfamily
ENSMUSG00000010307	373.161	673.985	-0.85292	2.0295e-10	7.1281e-09	Tmem86a	YhhN-like
ENSMUSG00000010358	214.116	68.4218	1.6459	5.2306e-10	1.7604e-08	Ifi35	Nmi/IFP 35 domain||-||Interferon-induced 35kDa protein||Nmi/IFP 35 domain, N-terminal
ENSMUSG00000010529	150.198	369.974	-1.3006	6.4052e-06	0.0001136	Gm266	P-loop containing nucleoside triphosphate hydrolase||Small GTPase superfamily, Ras type||Small GTP-binding protein domain||Small GTPase superfamily
ENSMUSG00000010554	1760.3	1303.61	0.43331	6.8303e-06	0.00012007	Mettl16	Ribosomal RNA large subunit methyltransferase F-like||-||S-adenosyl-L-methionine-dependent methyltransferase||Methyltransferase METTL16/PsiM
ENSMUSG00000010825	580.428	981.43	-0.75777	1.1128e-09	3.5782e-08	Grid2ip	Formin, FH2 domain||PDZ domain||PDZ superfamily
ENSMUSG00000011008	79.837	3.12089	4.677	1.1188e-07	2.741e-06	Mcoln2	-||Polycystin cation channel, PKD1/PKD2
ENSMUSG00000011114	1455.39	988.016	0.5588	2.6176e-08	7.1072e-07	Tbrg1	FY-rich, C-terminal||FY-rich, N-terminal||-
ENSMUSG00000011179	10493.1	4338.97	1.274	1.0302e-26	1.2111e-24	Odc1	Orn/DAP/Arg decarboxylase 2, conserved site||Ornithine/DAP/Arg decarboxylase||Orn/DAP/Arg decarboxylase 2, pyridoxal-phosphate binding site||PLP-binding barrel||Orn/DAP/Arg decarboxylase 2, C-terminal||Ornithine decarboxylase||Alanine racemase/group IV decarboxylase, C-terminal||Orn/DAP/Arg decarboxylase 2, N-terminal||-
ENSMUSG00000011257	2018.39	1442.84	0.48429	3.0215e-07	6.866e-06	Pabpc4	RNA recognition motif domain||RNA recognition motif domain, eukaryote||RNA-binding domain superfamily||PABC (PABP) domain||Polyadenylate-binding protein/Hyperplastic disc protein||Polyadenylate binding protein, human types 1, 2, 3, 4||-
ENSMUSG00000011589	2874.2	3832.13	-0.41499	2.0013e-06	3.9009e-05	Fsd1	B30.2/SPRY domain||Fibronectin type III and SPRY containing 1, PRY/SPRY domain||Fibronectin type III superfamily||COS domain||Fibronectin type III||SPRY domain||Concanavalin A-like lectin/glucanase domain superfamily||Immunoglobulin-like fold||B-box, C-terminal
ENSMUSG00000011658	266.394	372.16	-0.48236	0.0010161	0.010334	Fuz	Fuzzy protein||-
ENSMUSG00000011751	10713.5	13757.9	-0.36083	0.00060068	0.0065627	Sptbn4	Calponin-like domain superfamily||Pleckstrin homology domain, spectrin-type||Actinin-type actin-binding domain, conserved site||Spectrin repeat||Spectrin/alpha-actinin||Calponin homology domain||PH-like domain superfamily||Spectrin, beta subunit||Pleckstrin homology domain
ENSMUSG00000011837	1420.69	855.961	0.73098	8.594e-13	3.9321e-11	Snapc2	Small nuclear RNA activating complex subunit 2-like||-
ENSMUSG00000011958	1240.85	856.694	0.53448	2.3364e-07	5.4481e-06	Bnip2	Bcl2-/adenovirus E1B 19kDa-interacting protein 2||-||CRAL-TRIO lipid binding domain||CRAL-TRIO lipid binding domain superfamily
ENSMUSG00000011960	1855.9	1421.4	0.38481	4.3993e-05	0.00064847	Ccnt1	Cyclin-like||Cyclin-like superfamily||Cyclin-T1||-||Cyclin, N-terminal
ENSMUSG00000012126	416.585	605.401	-0.53928	0.00035293	0.0041708	Ubxn11	SEP domain||Ubiquitin-like domain superfamily||UBX domain||-||NSFL1 cofactor p47, SEP domain superfamily
ENSMUSG00000012405	6819.31	5502.74	0.30948	0.0035254	0.029834	Rpl15	Ribosomal protein L15e||Ribosomal protein L15e, conserved site||Ribosomal protein L15e core domain superfamily||Ribosomal protein L23/L15e core domain superfamily
ENSMUSG00000012428	655.063	35.9369	4.1881	2.8843e-46	7.6293e-44	Steap4	Pyrroline-5-carboxylate reductase, catalytic, N-terminal||NAD(P)-binding domain superfamily||Ferric reductase transmembrane component-like domain
ENSMUSG00000012519	66.2541	12.0265	2.4618	2.4453e-09	7.5749e-08	Mlkl	Protein kinase-like domain superfamily||Serine-threonine/tyrosine-protein kinase, catalytic domain||Protein kinase domain||-
ENSMUSG00000012609	2538.53	3120.24	-0.29766	0.00047884	0.0054031	Ttll5	-||Tubulin-tyrosine ligase/Tubulin polyglutamylase
ENSMUSG00000012848	6621.35	5211.06	0.34555	0.0015195	0.014533	Rps5	Ribosomal protein S5/S7, eukaryotic/archaeal||Ribosomal protein S7, conserved site||Ribosomal protein S5/S7||Ribosomal protein S7 domain||Ribosomal protein S7 domain superfamily
ENSMUSG00000013076	5282.61	2056.28	1.3612	1.039e-55	3.7424e-53	Amotl1	Angiomotin||-||Angiomotin, C-terminal
ENSMUSG00000013495	900.914	1211.9	-0.42781	0.00018189	0.0023152	Tmem175	Endosomal/lysomomal potassium channel TMEM175
ENSMUSG00000013523	36288.8	26322.5	0.46323	1.067e-07	2.6236e-06	Bcas1	Novel Amplified in Breast Cancer-1
ENSMUSG00000013846	2745.79	1639	0.74441	2.0486e-16	1.3038e-14	St3gal1	Glycosyl transferase family 29||Sialyltransferase
ENSMUSG00000013974	131.002	8.41295	3.9608	4.0523e-09	1.2261e-07	Mcemp1	-
ENSMUSG00000013997	788.126	1014.91	-0.36485	0.00065128	0.0070473	Nit1	Uncharacterised protein family UPF0012, conserved site||Carbon-nitrogen hydrolase||Carbon-nitrogen hydrolase superfamily
ENSMUSG00000014158	208.15	109.971	0.9205	0.00019666	0.0024883	Trpv4	Ankyrin repeat||Ankyrin repeat-containing domain superfamily||Transient receptor potential channel, vanilloid 1-4||Ion transport domain||Ankyrin repeat-containing domain||Transient receptor potential channel||Transient receptor potential channel, vanilloid 4||Transient receptor potential cation channel subfamily V
ENSMUSG00000014361	1151.28	621.119	0.89029	2.9863e-16	1.8724e-14	Mertk	Immunoglobulin-like domain||Serine-threonine/tyrosine-protein kinase, catalytic domain||Protein kinase-like domain superfamily||Tyrosine-protein kinase, catalytic domain||Protein kinase, ATP binding site||Protein kinase domain||Tyrosine-protein kinase, active site||Fibronectin type III superfamily||Immunoglobulin-like domain superfamily||Immunoglobulin||Immunoglobulin subtype||Fibronectin type II…
ENSMUSG00000014444	777.077	171.87	2.1767	2.9054e-26	3.3689e-24	Piezo1	-||Piezo family||Piezo domain||Piezo non-specific cation channel, R-Ras-binding domain
ENSMUSG00000014496	5339.8	3791.99	0.49383	1.9754e-08	5.4779e-07	Ankrd28	Ankyrin repeat-containing domain superfamily||-||Ankyrin repeat-containing domain||Ankyrin repeat
ENSMUSG00000014599	4455.48	2265.86	0.97552	3.8162e-30	5.2739e-28	Csf1	Four-helical cytokine-like, core||Macrophage colony stimulating factor-1
ENSMUSG00000014786	1313.73	1822.29	-0.47208	9.2249e-05	0.0012664	Slc9a5	Cation/H+ exchanger, CPA1 family||Na+/H+ exchanger, isoforms 3/5||Cation/H+ exchanger||Na+/H+ exchanger
ENSMUSG00000014791	235.026	359.985	-0.61512	9.775e-05	0.0013351	Elmo3	Domain of unknown function DUF3361||Engulfment and cell motility protein 3||Armadillo-type fold||-||ELMO domain||Armadillo-like helical||Pleckstrin homology domain||PH-like domain superfamily
ENSMUSG00000014813	354.281	71.6931	2.305	1.3575e-24	1.4453e-22	Stc1	Stanniocalcin
ENSMUSG00000014859	1381.44	963.552	0.51974	2.6978e-07	6.1968e-06	E2f4	Winged helix DNA-binding domain superfamily||E2F-DP heterodimerization region||E2F Family||Winged helix-like DNA-binding domain superfamily||E2F transcription factor, CC-MB domain||Transcription factor E2F4||E2F/DP family, winged-helix DNA-binding domain
ENSMUSG00000014867	3486.01	2358.28	0.56384	5.2436e-11	1.9639e-09	Surf4	Surfeit locus 4||-
ENSMUSG00000014905	2473.82	1960.92	0.33521	0.00019257	0.0024402	Dnajb9	DnaJ domain superfamily||DnaJ domain, conserved site||DnaJ domain
ENSMUSG00000014907	1068.87	758.836	0.49423	5.7471e-06	0.00010301	Naf1	H/ACA ribonucleoprotein complex, subunit Gar1/Naf1||-||Translation protein, beta-barrel domain superfamily
ENSMUSG00000015023	991.841	745.85	0.41122	0.00011796	0.0015786	Ddx19a	P-loop containing nucleoside triphosphate hydrolase||RNA helicase, DEAD-box type, Q motif||DEAD/DEAH box helicase domain||Helicase superfamily 1/2, ATP-binding domain||Helicase, C-terminal
ENSMUSG00000015053	585.022	175.746	1.735	2.8048e-32	4.2395e-30	Gata2	Zinc finger, NHR/GATA-type||Transcription factor GATA-2||Transcription factor, GATA-2/3||Zinc finger, GATA-type
ENSMUSG00000015085	407.052	537.961	-0.40229	0.0020526	0.018829	Entpd2	Nucleoside phosphatase GDA1/CD39
ENSMUSG00000015112	836.885	507.515	0.72158	8.7341e-09	2.534e-07	Slc25a13	Mitochondrial carrier protein||Mitochondrial substrate/solute carrier||EF-hand domain pair||EF-hand domain||Mitochondrial carrier domain superfamily
ENSMUSG00000015134	545.665	52.8949	3.3668	1.0098e-32	1.5684e-30	Aldh1a3	Aldehyde dehydrogenase, glutamic acid active site||Aldehyde dehydrogenase, cysteine active site||Aldehyde dehydrogenase domain||Aldehyde dehydrogenase, N-terminal||Aldehyde dehydrogenase NAD(P)-dependent||Aldehyde/histidinol dehydrogenase
ENSMUSG00000015143	1946.39	965.463	1.0115	1.7699e-18	1.2832e-16	Actn1	Calponin-like domain superfamily||Spectrin/alpha-actinin||EF-hand domain||Actinin-type actin-binding domain, conserved site||Spectrin repeat||EF-hand, Ca insensitive||EF-hand domain pair||EF-Hand 1, calcium-binding site||Alpha-actinin 1||Calponin homology domain
ENSMUSG00000015176	3372.16	2184.91	0.6261	6.5794e-13	3.06e-11	Nolc1	LIS1 homology motif||SRP40, C-terminal||-
ENSMUSG00000015202	799.485	525.86	0.60439	2.8385e-06	5.4206e-05	Magi1	PDZ superfamily||Sterile alpha motif/pointed domain superfamily||CRIC domain||Connector enhancer of kinase suppressor of ras 2||PDZ domain||Sterile alpha motif domain
ENSMUSG00000015312	2660.94	686.766	1.954	5.1314e-87	3.8609e-84	Gadd45b	Ribosomal protein L7Ae/L30e/S12e/Gadd45||Growth arrest and DNA damage-inducible protein GADD45||50S ribosomal protein L30e-like
ENSMUSG00000015340	141.2	69.2118	1.0287	0.0019894	0.018293	Cybb	Ferric reductase transmembrane component-like domain||Ferredoxin reductase-type FAD-binding domain||Riboflavin synthase-like beta-barrel||-||Ferric reductase, NAD binding domain||FAD-binding 8||Cytochrome b245, heavy chain
ENSMUSG00000015354	965.342	647.301	0.5766	1.4633e-07	3.5187e-06	Pcolce2	Spermadhesin, CUB domain superfamily||Tissue inhibitor of metalloproteinases-like, OB-fold||Netrin domain||Procollagen C-endopeptidase enhancer, NTR domain||Netrin module, non-TIMP type||CUB domain
ENSMUSG00000015377	2070.27	3255.72	-0.65316	8.2163e-05	0.0011396	Dennd6b	AVL9/DENND6 domain||-||Tripartite DENN domain||DENND6
ENSMUSG00000015468	817.815	349.789	1.2253	2.7641e-23	2.7526e-21	Notch4	EGF-like calcium-binding domain||Notch-like domain superfamily||Notch||EGF-type aspartate/asparagine hydroxylation site||Notch domain||Ankyrin repeat-containing domain superfamily||EGF-like domain||EGF-like, conserved site||Ankyrin repeat||Notch, NODP domain||Notch, NOD domain||Neurogenic locus Notch 4||Ankyrin repeat-containing domain||EGF-like calcium-binding, conserved site||Growth factor rece…
ENSMUSG00000015478	2742.29	4167.21	-0.6037	0.00273	0.023928	Rnf5	Zinc finger, RING/FYVE/PHD-type||Zinc finger, RING-type||Zinc finger, RING-type, conserved site
ENSMUSG00000015533	49.4625	16.8728	1.5516	0.0062669	0.047845	Itga2	Integrin alpha-2||Integrin domain superfamily||von Willebrand factor A-like domain superfamily||Integrin alpha beta-propellor||von Willebrand factor, type A||Integrin alpha chain, C-terminal cytoplasmic region, conserved site||Integrin alpha chain||FG-GAP repeat
ENSMUSG00000015568	1300.33	319.929	2.023	1.548e-21	1.3866e-19	Lpl	-||Lipase/vitellogenin||Triacylglycerol lipase family||Lipase, N-terminal||Lipase, LIPH-type||PLAT/LH2 domain superfamily||Alpha/Beta hydrolase fold||PLAT/LH2 domain||Lipoprotein lipase
ENSMUSG00000015575	1684.17	1113.31	0.59719	5.2874e-09	1.5801e-07	Atp6v0e	ATPase, V0 complex, subunit e1/e2||ATPase, V0 complex, subunit e1/e2, metazoa
ENSMUSG00000015647	780.611	583.027	0.42104	0.00043223	0.0049507	Lama5	Laminin domain II||Laminin EGF domain||Concanavalin A-like lectin/glucanase domain superfamily||Laminin IV||Laminin alpha, domain I||Laminin, N-terminal||EGF-like domain||Laminin G domain||Galactose-binding-like domain superfamily
ENSMUSG00000015652	40.4555	6.10158	2.7291	6.7564e-07	1.4515e-05	Steap1	Ferric reductase transmembrane component-like domain
ENSMUSG00000015672	641.143	504.121	0.34688	0.0048459	0.039055	Mrpl32	-||Zinc-binding ribosomal protein||Ribosomal protein L32p
ENSMUSG00000015748	891.92	661.96	0.43017	0.00014659	0.0019133	Prpf3	PWI domain||-||PWI domain superfamily||Pre-mRNA-splicing factor 3||Domain of unknown function DUF1115||U4/U6 small nuclear ribonucleoprotein Prp3
ENSMUSG00000015766	2037.18	1515.07	0.42719	1.262e-05	0.00021027	Eps8	Tensin/EPS8 phosphotyrosine-binding domain||SH3-like domain superfamily||-||SH3 domain||Epidermal growth factor receptor kinase substrate 8||PTB/PI domain||Epidermal growth factor receptor kinase substrate, phosphotyrosine-binding domain||PH-like domain superfamily||Eps8, SH3 domain
ENSMUSG00000015776	1875.07	1313.43	0.51361	7.4715e-08	1.878e-06	Med22	Mediator of RNA polymerase II transcription subunit 22
ENSMUSG00000015806	10044.3	14037.7	-0.48292	0.00012862	0.0017017	Qdpr	Short-chain dehydrogenase/reductase SDR||NAD(P)-binding domain superfamily||Short-chain dehydrogenase/reductase, conserved site
ENSMUSG00000015829	4799.8	5843	-0.28373	0.00058252	0.0063891	Tnr	Tenascin-R||Immunoglobulin-like fold||EGF-like, conserved site||Fibronectin type III||EGF-like domain||Fibrinogen, alpha/beta/gamma chain, C-terminal globular, subdomain 2||Fibronectin type III superfamily||Fibrinogen, alpha/beta/gamma chain, C-terminal globular domain||Fibrinogen-like, C-terminal||Fibrinogen, alpha/beta/gamma chain, C-terminal globular, subdomain 1||-
ENSMUSG00000015839	1438.72	872.983	0.72077	4.05e-06	7.4972e-05	Nfe2l2	Basic leucine zipper domain, Maf-type||Nuclear factor erythroid 2-related factor 2||Basic-leucine zipper domain||Transcription factor, Skn-1-like, DNA-binding domain superfamily
ENSMUSG00000015947	393.069	139.703	1.4924	3.4856e-16	2.1774e-14	Fcgr1	Immunoglobulin subtype||Immunoglobulin-like fold||Immunoglobulin subtype 2||Immunoglobulin-like domain superfamily||Immunoglobulin-like domain||-||Immunoglobulin
ENSMUSG00000015950	441.691	212.981	1.0523	3.9268e-10	1.3403e-08	Ncf1	Neutrophil cytosol factor 1, second SH3 domain||-||SH3 domain||SH3-like domain superfamily||Neutrophil cytosol factor 1, C-terminal||Neutrophil cytosol factor 1||Neutrophil cytosol factor 1, PX domain||NADPH oxidase subunit p47Phox, C-terminal||PX domain superfamily||Phox homologous domain||Neutrophil cytosol factor 1, first SH3 domain
ENSMUSG00000015966	85.8759	139.089	-0.69568	0.0022953	0.020761	Il17rb	Interleukin-17 receptor, fibronectin-III-like domain 1||SEFIR domain||-
ENSMUSG00000015970	227.942	464.67	-1.0275	2.3138e-12	9.9925e-11	Chdh	Oxygen-dependent choline dehydrogenase||FAD/NAD(P)-binding domain superfamily||Glucose-methanol-choline oxidoreductase||Glucose-methanol-choline oxidoreductase, N-terminal||Glucose-methanol-choline oxidoreductase, C-terminal
ENSMUSG00000015980	14.7316	118.395	-3.0066	0.001013	0.010309	Lrrc27	Leucine-rich repeat||Leucine-rich repeat domain superfamily||Leucine-rich repeat, typical subtype||-
ENSMUSG00000016028	94.6568	171.285	-0.85562	0.0001155	0.00155	Celsr1	-||GPCR, family 2-like||Cadherin||Growth factor receptor cysteine-rich domain superfamily||GPCR, family 2, extracellular hormone receptor domain||Concanavalin A-like lectin/glucanase domain superfamily||EGF-like, conserved site||EGF-like domain||Laminin EGF domain||Cadherin conserved site||EGF-type aspartate/asparagine hydroxylation site||Laminin G domain||EGF-like calcium-binding domain||Cadheri…
ENSMUSG00000016087	241.65	128.39	0.91239	0.00014165	0.0018568	Fli1	Friend leukemia integration 1 transcription factor, pointed domain||Friend leukemia integration 1 transcription factor||Winged helix DNA-binding domain superfamily||Ets domain||Winged helix-like DNA-binding domain superfamily||Sterile alpha motif/pointed domain superfamily||Pointed domain
ENSMUSG00000016128	1186.55	873.227	0.44235	1.6213e-05	0.00026353	Stard13	START domain||START-like domain superfamily||Sterile alpha motif/pointed domain superfamily||Rho GTPase activation protein||Sterile alpha motif domain||Rho GTPase-activating protein domain
ENSMUSG00000016150	851.513	1128.11	-0.40581	0.00038374	0.0044737	Tenm1	Six-bladed beta-propeller, TolB-like||EGF-like domain||Teneurin intracellular, N-terminal||EGF-like, conserved site||Teneurin-1/4||Tox-GHH domain||WD40/YVTN repeat-like-containing domain superfamily||YD repeat
ENSMUSG00000016181	895.691	707.839	0.33958	0.0025711	0.022775	Diexf	P-loop containing nucleoside triphosphate hydrolase||Digestive organ expansion factor, predicted||-
ENSMUSG00000016253	2148.57	2573.34	-0.26027	0.0041197	0.03393	Nelfcd	Armadillo-like helical||TH1 protein
ENSMUSG00000016257	2271.24	1889.78	0.26526	0.004066	0.033569	Prelid3b	PRELI/MSF1 domain||Slowmo/Ups family
ENSMUSG00000016481	1098.1	744.363	0.56093	2.383e-07	5.5453e-06	Cr1l	Sushi/SCR/CCP superfamily||Sushi/SCR/CCP domain||-||Cytochrome c1, transmembrane anchor, C-terminal
ENSMUSG00000016487	1421.57	1018.19	0.48148	2.832e-05	0.00043704	Ppfibp1	Sterile alpha motif/pointed domain superfamily||Liprin-beta-1||Sterile alpha motif domain||LAR-interacting protein, Liprin||-
ENSMUSG00000016494	915.98	503.99	0.86192	2.8515e-12	1.219e-10	Cd34	CD34/Podocalyxin||CD34 antigen||-
ENSMUSG00000016496	531.767	189.518	1.4885	1.3553e-23	1.3739e-21	Cd274	Immunoglobulin-like domain superfamily||Immunoglobulin-like domain||Immunoglobulin-like fold||CD80-like, immunoglobulin C2-set||Immunoglobulin subtype||Immunoglobulin V-set domain
ENSMUSG00000016520	246.417	167.926	0.55328	0.0017683	0.016535	Lnx2	Zinc finger, RING/FYVE/PHD-type||Zinc finger, RING-type, conserved site||PDZ domain||Zinc finger, RING-type||PDZ superfamily
ENSMUSG00000016524	31.9302	4.34289	2.8782	3.6445e-05	0.00054552	Il19	Interleukin-10/19/20/22/24/26 family||Four-helical cytokine-like, core||Interleukin-10, conserved site||Interleukin-19
ENSMUSG00000016528	2948.5	1723.79	0.7744	5.3554e-18	3.7386e-16	Mapkapk2	Serine/threonine-protein kinase, active site||Protein kinase, ATP binding site||Protein kinase domain||MAP kinase activated protein kinase, C-terminal||Protein kinase-like domain superfamily
ENSMUSG00000016534	7017.07	5063.66	0.47069	2.0191e-05	0.00032183	Lamp2	Lysosome-associated membrane glycoprotein||Lysosome-associated membrane glycoprotein, conserved site
ENSMUSG00000016554	2149.73	1640.27	0.39022	2.2535e-05	0.00035537	Eif3d	Eukaryotic translation initiation factor 3 subunit D||Armadillo-like helical
ENSMUSG00000016559	10926.8	8229.09	0.40906	2.3982e-07	5.5768e-06	H3f3b	Histone H3/CENP-A||Histone H2A/H2B/H3||Histone-fold
ENSMUSG00000016619	2531.74	2098.69	0.27064	0.0023815	0.021416	Nup50	PH-like domain superfamily||Nuclear pore complex, NUP2/50/61||Ran binding domain
ENSMUSG00000016763	1141.26	756.549	0.59312	2.1313e-08	5.8715e-07	Scube1	CUB domain||EGF-like calcium-binding, conserved site||Growth factor receptor cysteine-rich domain superfamily||EGF-type aspartate/asparagine hydroxylation site||Spermadhesin, CUB domain superfamily||Tyrosine-protein kinase ephrin type A/B receptor-like||EGF-like domain||Six-bladed beta-propeller, TolB-like||EGF-like calcium-binding domain||EGF domain||Complement Clr-like EGF domain||EGF-like, con…
ENSMUSG00000016918	1056.67	600.223	0.81595	9.8195e-06	0.00016741	Sulf1	Extracellular sulfatase||Alkaline phosphatase-like, alpha/beta/alpha||Sulfatase, N-terminal||Sulfatase, conserved site||-||Alkaline-phosphatase-like, core domain superfamily||Extracellular sulfatase, C-terminal
ENSMUSG00000016995	247.527	361.535	-0.54655	0.00038573	0.0044926	Matn4	Matrilin-4||Matrilin, coiled-coil trimerisation domain||EGF-like, conserved site||EGF-like calcium-binding domain||EGF-like domain||Growth factor receptor cysteine-rich domain superfamily||von Willebrand factor A-like domain superfamily||von Willebrand factor, type A||Matrilin, coiled-coil domain superfamily||EGF-type aspartate/asparagine hydroxylation site
ENSMUSG00000017002	132.511	26.6727	2.3127	3.12e-11	1.1963e-09	Slpi	-||Elafin-like superfamily||WAP-type 'four-disulfide core' domain
ENSMUSG00000017009	12315	4722.25	1.3829	6.0829e-65	2.9422e-62	Sdc4	Syndecan, conserved site||Cytochrome c1, transmembrane anchor, C-terminal||Syndecan/Neurexin domain||Syndecan||Neurexin/syndecan/glycophorin C
ENSMUSG00000017057	724.059	210.195	1.7844	2.8766e-07	6.5644e-06	Il13ra1	Fibronectin type III superfamily||Type I cytokine receptor, cytokine-binding domain||Short hematopoietin receptor, family 2, conserved site||Immunoglobulin-like fold||Fibronectin type III
ENSMUSG00000017144	1069.83	739.626	0.53251	5.2366e-07	1.1491e-05	Rnd3	Small GTPase superfamily, Rho type||P-loop containing nucleoside triphosphate hydrolase||Small GTP-binding protein domain||Small GTPase superfamily
ENSMUSG00000017221	6157.31	5221.83	0.23774	0.0029787	0.025767	Psmd3	Tetratricopeptide-like helical domain superfamily||26S proteasome regulatory subunit, C-terminal||26S proteasome non-ATPase regulatory subunit 3||Winged helix DNA-binding domain superfamily||Proteasome component (PCI) domain||Winged helix-like DNA-binding domain superfamily
ENSMUSG00000017386	387.347	624.144	-0.68825	9.2821e-08	2.3007e-06	Traf4	TNF receptor-associated factor TRAF||Zinc finger, RING/FYVE/PHD-type||TNF receptor-associated factor 4||MATH/TRAF domain||Zinc finger, RING-type, conserved site||Zinc finger, TRAF-type||Zinc finger, RING-type||TRAF-like||TNF receptor-associated factor 4, MATH domain||Zinc finger, C3HC4 RING-type
ENSMUSG00000017404	4553.19	3564.03	0.35337	0.00070431	0.007544	Rpl19	Ribosomal protein L19/L19e, domain 1||Ribosomal protein L19, eukaryotic||Ribosomal protein L19/L19e||Ribosomal protein L19/L19e conserved site||Ribosomal protein L19/L19e, domain 3||Ribosomal protein L19/L19e superfamily||Ribosomal protein L19/L19e, domain 2
ENSMUSG00000017418	1214.24	973.417	0.31892	0.0018328	0.017052	Arl5b	Small GTPase superfamily, ARF/SAR type||Small GTP-binding protein domain||Small GTPase superfamily, ARF type||-||P-loop containing nucleoside triphosphate hydrolase
ENSMUSG00000017421	3717.11	2648.66	0.48892	1.5862e-08	4.4792e-07	Zfp207	-||Zinc finger C2H2-type
ENSMUSG00000017428	2615.3	1873.38	0.48133	7.7308e-08	1.936e-06	Psmd11	Proteasome component (PCI) domain||Winged helix-like DNA-binding domain superfamily||26S Proteasome non-ATPase regulatory subunit 11||Winged helix DNA-binding domain superfamily||Tetratricopeptide-like helical domain superfamily||-
ENSMUSG00000017478	3275.6	2766.75	0.24356	0.0041559	0.034186	Zc3h18	Zinc finger, CCCH-type superfamily||-||Zinc finger, CCCH-type
ENSMUSG00000017550	169.936	246.785	-0.53826	0.0028962	0.025169	Atad5	AAA+ ATPase domain||P-loop containing nucleoside triphosphate hydrolase||ATPase, AAA-type, core
ENSMUSG00000017615	2043.7	1583.78	0.36781	5.5809e-05	0.00080135	Tnfaip1	SKP1/BTB/POZ domain superfamily||Potassium channel tetramerisation-type BTB domain||BTB/POZ domain
ENSMUSG00000017639	9994.51	12369.7	-0.3076	9.0207e-05	0.0012421	Rab11fip4	EF-hand domain pair||-||FIP-RBD, C-terminal domain superfamily||Rab-binding domain FIP-RBD||EF-hand domain
ENSMUSG00000017670	4541.91	5731.73	-0.33567	6.7413e-05	0.00095063	Elmo2	Armadillo-type fold||Domain of unknown function DUF3361||Engulfment and cell motility protein 2||-||ELMO domain||Pleckstrin homology domain||Armadillo-like helical||PH-like domain superfamily
ENSMUSG00000017677	3623.88	4953.21	-0.45083	7.4411e-08	1.8718e-06	Wsb1	SOCS box-like domain superfamily||WD40/YVTN repeat-like-containing domain superfamily||WD40-repeat-containing domain||-||SOCS box domain||G-protein beta WD-40 repeat||WD40 repeat, conserved site||WD40 repeat||WD40-repeat-containing domain superfamily
ENSMUSG00000017679	2030.83	1091.58	0.89565	3.5953e-20	2.9983e-18	Ttpal	CRAL-TRIO lipid binding domain superfamily||CRAL-TRIO lipid binding domain||CRAL/TRIO, N-terminal domain||-||CRAL/TRIO, N-terminal domain superfamily
ENSMUSG00000017697	394.536	88.1721	2.1618	5.1175e-18	3.5799e-16	Ada	Metal-dependent hydrolase||Adenosine/AMP deaminase domain||Adenosine/adenine deaminase||Adenosine deaminase||Adenosine/AMP deaminase active site
ENSMUSG00000017707	11668.8	9123.5	0.355	0.00084578	0.0088139	Serinc3	Serine incorporator/TMS membrane protein||Serine incorporator 3
ENSMUSG00000017715	4987.54	4263.06	0.22644	0.0051103	0.040775	Pgs1	-||Phospholipase D/Transphosphatidylase||CDP-alcohol phosphatidyltransferase class-II family
ENSMUSG00000017734	8611.24	5731.58	0.58729	7.5636e-08	1.8984e-06	Dbndd2	-||Dysbindin
ENSMUSG00000017756	405.255	265.373	0.61081	2.4225e-05	0.00037991	Slc12a7	K/Cl co-transporter 4||SLC12A transporter, C-terminal||SLC12A transporter family||-||K/Cl co-transporter||Amino acid permease/ SLC12A domain
ENSMUSG00000017765	1871.37	1286.4	0.54076	8.7814e-09	2.5455e-07	Slc12a4	K/Cl co-transporter||Amino acid permease/ SLC12A domain||SLC12A transporter family||K/Cl co-transporter 1||SLC12A transporter, C-terminal
ENSMUSG00000017774	1973.18	936.276	1.0755	4.501e-18	3.1749e-16	Myo1c	IQ motif, EF-hand binding site||Class I myosin, motor domain||Myosin head, motor domain||P-loop containing nucleoside triphosphate hydrolase||-||Class I myosin tail homology domain
ENSMUSG00000017868	185.175	291.22	-0.65322	0.00013046	0.0017227	Sgk2	Protein kinase, C-terminal||Serine/threonine-protein kinase, active site||Protein kinase-like domain superfamily||Protein kinase domain||AGC-kinase, C-terminal||Protein kinase, ATP binding site
ENSMUSG00000017929	3297.84	2548.6	0.37182	1.3118e-05	0.00021805	B4galt5	Galactosyltransferase, N-terminal||Nucleotide-diphospho-sugar transferases||Beta-1,4-galactosyltransferase||Galactosyltransferase, C-terminal
ENSMUSG00000017999	2067.18	1691.16	0.28965	0.0012401	0.012241	Ddx27	Helicase superfamily 1/2, ATP-binding domain||ATP-dependent RNA helicase DEAD-box, conserved site||Helicase, C-terminal||DEAD/DEAH box helicase domain||RNA helicase, DEAD-box type, Q motif||P-loop containing nucleoside triphosphate hydrolase
ENSMUSG00000018008	909.481	525.346	0.79178	3.9606e-12	1.67e-10	Cyth4	PH-like domain superfamily||-||Pleckstrin homology domain||Sec7 domain||Sec7 domain superfamily||Sec7, C-terminal domain superfamily
ENSMUSG00000018040	4067.23	3248.4	0.32432	0.00013748	0.0018063	Rrp7a	Rrp7A, RNA recognition motif||Ribosomal RNA-processing protein 7||-||RNA-binding domain superfamily
ENSMUSG00000018076	2752.29	1964.84	0.48622	5.5942e-08	1.4317e-06	Med13l	Mediator complex, subunit Med13||Mediator complex, subunit Med13, N-terminal, metazoa/fungi
ENSMUSG00000018143	3605.04	926.737	1.9598	3.6081e-93	3.3017e-90	Mafk	Basic leucine zipper domain, Maf-type||Transcription factor MafK||Transcription factor Maf family||Basic-leucine zipper domain||Transcription factor, Skn-1-like, DNA-binding domain superfamily
ENSMUSG00000018160	1733.42	1405.45	0.30259	0.0013511	0.013153	Med1	Mediator complex, subunit Med1
ENSMUSG00000018166	1006.51	1240.36	-0.30141	0.0051501	0.041038	Erbb3	Protein kinase-like domain superfamily||Serine-threonine/tyrosine-protein kinase, catalytic domain||Receptor L-domain||Protein kinase domain||Growth factor receptor cysteine-rich domain superfamily||Tyrosine-protein kinase, catalytic domain||Furin-like cysteine-rich domain||Receptor L-domain superfamily||Growth factor receptor domain 4||Leucine-rich repeat domain superfamily||Tyrosine-protein kin…
ENSMUSG00000018171	7577.47	6286.53	0.26945	0.0034291	0.029142	Vmp1	SNARE associated Golgi protein||-
ENSMUSG00000018293	8334.3	5958.08	0.48421	9.4296e-10	3.0788e-08	Pfn1	Profilin superfamily||Profilin1/2/3, vertebrate||Profilin conserved site||Profilin||-
ENSMUSG00000018326	18613.3	15999.8	0.21828	0.0054619	0.043007	Ywhab	14-3-3 protein, conserved site||14-3-3 domain||14-3-3 protein||14-3-3 domain superfamily
ENSMUSG00000018334	2324.99	2786.23	-0.26109	0.004418	0.035992	Ksr1	Protein kinase C-like, phorbol ester/diacylglycerol-binding domain||Kinase suppressor of RAS, SAM-like domain||Serine/threonine-protein kinase, active site||Serine-threonine/tyrosine-protein kinase, catalytic domain||Protein kinase-like domain superfamily||-||Protein kinase domain
ENSMUSG00000018339	1033.83	813.918	0.34504	0.0028074	0.024511	Gpx3	Glutathione peroxidase conserved site||Thioredoxin-like superfamily||Glutathione peroxidase||Glutathione peroxidase active site
ENSMUSG00000018362	1061.05	774.898	0.45341	0.0045771	0.037092	Kpna2	Armadillo-like helical||Armadillo-type fold||Atypical Arm repeat||Armadillo||Importin-alpha, importin-beta-binding domain||-||Importin subunit alpha
ENSMUSG00000018395	5103.21	6002.03	-0.23404	0.0032289	0.027635	Kif3a	P-loop containing nucleoside triphosphate hydrolase||-||Kinesin motor domain, conserved site||Kinesin motor domain||Kinesin motor domain superfamily||Kinesin-like protein
ENSMUSG00000018411	16513.3	20512	-0.31284	5.4205e-05	0.00078196	Mapt	Microtubule associated protein, tubulin-binding repeat||Microtubule-associated protein Tau||-
ENSMUSG00000018417	807.065	513.924	0.65113	6.8394e-07	1.4675e-05	Myo1b	Myosin head, motor domain||IQ motif, EF-hand binding site||Class I myosin, motor domain||Class I myosin tail homology domain||P-loop containing nucleoside triphosphate hydrolase
ENSMUSG00000018425	1090.52	850.268	0.35903	0.00064099	0.006947	Dhx40	Helicase, C-terminal||Helicase superfamily 1/2, ATP-binding domain||Helicase-associated domain||DEAD/DEAH box helicase domain||DNA/RNA helicase, ATP-dependent, DEAH-box type, conserved site||Domain of unknown function DUF1605||P-loop containing nucleoside triphosphate hydrolase
ENSMUSG00000018427	1135.16	1809.94	-0.67305	6.1836e-12	2.5377e-10	Ypel2	Yippee domain||Yippee/Mis18/Cereblon
ENSMUSG00000018433	900.526	703.111	0.35702	0.0013457	0.013111	Nol11	NUC205||WD40/YVTN repeat-like-containing domain superfamily
ENSMUSG00000018446	2509.39	1914.48	0.39039	1.3032e-05	0.00021671	C1qbp	Mitochondrial glycoprotein superfamily||Mitochondrial glycoprotein
ENSMUSG00000018459	977.05	1371.35	-0.48909	0.00062156	0.006756	Slc13a3	Solute carrier family 13
ENSMUSG00000018474	17586.4	20437.4	-0.21675	0.0061243	0.047062	Chd3	Zinc finger, PHD-finger||Helicase, C-terminal||Chromo/chromo shadow domain||Zinc finger, FYVE/PHD-type||Zinc finger, PHD-type||Domain of unknown function DUF1087||DNA/RNA helicase, ATP-dependent, DEAH-box type, conserved site||Zinc finger, RING/FYVE/PHD-type||SNF2-related, N-terminal domain||Helicase superfamily 1/2, ATP-binding domain||Zinc finger, PHD-type, conserved site||CHD, N-terminal||P-lo…
ENSMUSG00000018476	6202.91	1951.77	1.6682	1.1711e-83	8.0918e-81	Kdm6b	JmjC domain||Tetratricopeptide-like helical domain superfamily||Lysine-specific demethylase 6B
ENSMUSG00000018481	7430.97	5408.97	0.4582	2.6426e-08	7.1694e-07	Appbp2	Winged helix-like DNA-binding domain superfamily||Tetratricopeptide repeat-containing domain||Tetratricopeptide repeat||Tetratricopeptide-like helical domain superfamily
ENSMUSG00000018537	457.742	608.934	-0.41175	0.0049332	0.039627	Pcgf2	Zinc finger, RING/FYVE/PHD-type||Zinc finger, RING-type||Zinc finger, RING-type, conserved site||RAWUL domain
ENSMUSG00000018541	902.761	690.992	0.38568	0.0004819	0.0054333	Cwc25	CBF1-interacting co-repressor CIR, N-terminal domain||Pre-mRNA splicing factor||-
ENSMUSG00000018559	1522.15	1122.17	0.43983	5.904e-06	0.0001056	Ctdnep1	FCP1 homology domain||Dullard phosphatase domain, eukaryotic||HAD-like superfamily||HAD superfamily
ENSMUSG00000018581	24.0239	69.7928	-1.5386	0.00059925	0.0065513	Dnah11	Dynein heavy chain, AAA module D4||AAA+ ATPase domain||ATPase, dynein-related, AAA domain||Dynein heavy chain domain||Dynein heavy chain, coiled coil stalk||-||Dynein heavy chain, domain-1||Dynein heavy chain, domain-2||Dynein heavy chain||Dynein heavy chain, ATP-binding dynein motor region D5||P-loop containing nucleoside triphosphate hydrolase||Dynein heavy chain, hydrolytic ATP-binding dynein …
ENSMUSG00000018583	4888.32	3235.51	0.59535	1.2795e-12	5.7076e-11	G3bp1	NTF2-like domain superfamily||RNA recognition motif domain||Ras GTPase-activating protein-bianding protein 1||Nuclear transport factor 2, eukaryote||RNA-binding domain superfamily||Nuclear transport factor 2||G3BP1, RNA recognition motif
ENSMUSG00000018604	191.732	68.7264	1.4802	4.828e-05	0.00070552	Tbx3	T-box superfamily||Transcription factor, T-box, conserved site||p53-like transcription factor, DNA-binding||Transcription factor, T-box, region of unknown function||Transcription factor, Brachyury||Transcription factor, T-box
ENSMUSG00000018648	260.392	153.63	0.76123	3.3948e-05	0.00051242	Dusp14	Atypical dual specificity phosphatase, subfamily B||Dual specificity phosphatase, catalytic domain||Protein-tyrosine phosphatase, active site||Dual specificity phosphatase||Atypical dual specificity phosphatase||Tyrosine specific protein phosphatases domain||Protein-tyrosine phosphatase-like||Dual specificity protein phosphatase domain
ENSMUSG00000018697	643.459	420.5	0.61374	1.282e-06	2.6218e-05	Aatf	AATF leucine zipper-containing domain||Apoptosis-antagonizing transcription factor, C-terminal
ENSMUSG00000018750	12374.2	15672.3	-0.34089	1.3384e-05	0.00022181	Zbtb4	SKP1/BTB/POZ domain superfamily||Zinc finger C2H2-type||Zinc finger, RING/FYVE/PHD-type||Zinc finger C2H2 superfamily||BTB/POZ domain
ENSMUSG00000018774	515.564	209.849	1.2968	3.0136e-19	2.3402e-17	Cd68	Lysosome-associated membrane glycoprotein, conserved site||Lysosome-associated membrane glycoprotein
ENSMUSG00000018821	738.076	542.376	0.44448	0.00019821	0.0025059	Avpi1	Arginine vasopressin-induced protein 1/transcriptional and immune response regulator
ENSMUSG00000018822	714.389	1009.99	-0.49956	0.0024884	0.022206	Sfrp5	Tissue inhibitor of metalloproteinases-like, OB-fold||Netrin domain||Secreted frizzled-related protein 5||Frizzled domain||Netrin module, non-TIMP type||Frizzled cysteine-rich domain superfamily||Frizzled/secreted frizzled-related protein
ENSMUSG00000018830	478.038	118.846	2.008	1.6172e-17	1.0951e-15	Myh11	IQ motif, EF-hand binding site||Myosin tail||Myosin S1 fragment, N-terminal||Myosin head, motor domain||P-loop containing nucleoside triphosphate hydrolase||Myosin, N-terminal, SH3-like
ENSMUSG00000018846	3305.78	2806.4	0.23627	0.0065791	0.049789	Pank3	Type II pantothenate kinase
ENSMUSG00000018848	2130.45	1555.64	0.45365	1.1603e-06	2.3867e-05	Rars	DALR anticodon binding||Arginyl-tRNA synthetase, catalytic core domain||Arginyl tRNA synthetase N-terminal domain||Arginine-tRNA ligase||Aminoacyl-tRNA synthetase, class Ia, anticodon-binding||Aminoacyl-tRNA synthetase, class I, conserved site||Arginyl tRNA synthetase N-terminal domain superfamily||Rossmann-like alpha/beta/alpha sandwich fold
ENSMUSG00000018861	699.443	936.068	-0.42041	0.00016184	0.0020946	Fdxr	FAD/NAD(P)-binding domain||FAD/NAD(P)-binding domain superfamily||Ferredoxin-NADP+ reductase, adrenodoxin-type
ENSMUSG00000018899	553.449	182.845	1.5978	5.0583e-21	4.4026e-19	Irf1	Winged helix DNA-binding domain superfamily||Winged helix-like DNA-binding domain superfamily||Interferon regulatory factor DNA-binding domain||Interferon regulatory factor-1/2||Interferon regulatory factor, conserved site||-||Interferon regulatory factor 1
ENSMUSG00000018900	980.201	776.722	0.33568	0.001812	0.016877	Slc22a5	MFS transporter superfamily||Organic cation transport protein/SVOP||Sugar transporter, conserved site||Major facilitator superfamily domain||-||Major facilitator, sugar transporter-like
ENSMUSG00000018906	605.272	471.68	0.35978	0.0051443	0.041021	P4ha2	-||Oxoglutarate/iron-dependent dioxygenase||Tetratricopeptide-like helical domain superfamily||Prolyl 4-hydroxylase alpha-subunit, N-terminal||Tetratricopeptide repeat||Prolyl 4-hydroxylase, alpha subunit||Tetratricopeptide repeat-containing domain
ENSMUSG00000018909	13731.2	11575.3	0.24641	0.0021055	0.01922	Arrb1	Arrestin, conserved site||Arrestin, N-terminal||Arrestin||Arrestin-like, N-terminal||Immunoglobulin E-set||Arrestin C-terminal-like domain
ENSMUSG00000018927	985.591	93.8843	3.392	9.3093e-12	3.7568e-10	Ccl6	Chemokine interleukin-8-like superfamily||CC chemokine, conserved site||Chemokine interleukin-8-like domain
ENSMUSG00000018930	301.647	1.52517	7.6277	3.9445e-93	3.5145e-90	Ccl4	Chemokine interleukin-8-like domain||CC chemokine, conserved site||Chemokine interleukin-8-like superfamily
ENSMUSG00000018932	1272.88	510.672	1.3176	7.4642e-33	1.17e-30	Map2k3	Protein kinase-like domain superfamily||Protein kinase domain||Protein kinase, ATP binding site||-||Serine/threonine-protein kinase, active site
ENSMUSG00000019122	1457.34	65.551	4.4746	1.7616e-173	6.6272e-170	Ccl9	Chemokine interleukin-8-like superfamily||CC chemokine, conserved site||Chemokine interleukin-8-like domain
ENSMUSG00000019132	7404.57	5852.22	0.33943	2.7182e-05	0.00042175	BC005537	Protein of unknown function DUF4566
ENSMUSG00000019188	3076.28	2531.87	0.28098	0.0013013	0.012746	H13	Peptidase A22B, signal peptide peptidase||Presenilin/signal peptide peptidase
ENSMUSG00000019214	85.8896	144.733	-0.75284	0.00096672	0.0098826	Chtf18	AAA+ ATPase domain||P-loop containing nucleoside triphosphate hydrolase||ATPase, AAA-type, core||-
ENSMUSG00000019256	218.026	130.416	0.74138	0.001538	0.014677	Ahr	Myc-type, basic helix-loop-helix (bHLH) domain||PAS domain||PAS fold-3||Aryl hydrocarbon receptor||Helix-loop-helix DNA-binding domain superfamily||PAS fold||PAS domain superfamily||-||PAC motif
ENSMUSG00000019278	53.8357	5.01076	3.4255	6.0383e-06	0.00010766	Dpep1	Metal-dependent hydrolase||Dipeptidase 1||Membrane dipeptidase, active site||Peptidase M19
ENSMUSG00000019297	750.325	379.56	0.98319	1.4164e-15	8.443e-14	Nop9	Pumilio RNA-binding repeat||Armadillo-type fold||Armadillo-like helical
ENSMUSG00000019326	27.0875	8.98138	1.5926	0.0049201	0.03955	Aoc3	Copper amine oxidase, N2-terminal||Copper amine oxidase, N3-terminal||Copper amine oxidase, catalytic domain||Copper amine oxidase, N-terminal||Copper amine oxidase, catalytic domain superfamily||Copper amine oxidase
ENSMUSG00000019359	314.05	500.176	-0.67144	9.4257e-07	1.9773e-05	Gdpd2	Glycerophosphoryl diester phosphodiesterase||Glycerophosphodiester phosphodiesterase domain||PLC-like phosphodiesterase, TIM beta/alpha-barrel domain superfamily
ENSMUSG00000019437	872.661	1330.06	-0.608	6.1932e-09	1.8313e-07	Tlcd1	TRAM/LAG1/CLN8 homology domain
ENSMUSG00000019478	2008.65	1564.98	0.36008	9.8569e-05	0.0013452	Rab4a	-||P-loop containing nucleoside triphosphate hydrolase||Small GTPase superfamily||Small GTP-binding protein domain
ENSMUSG00000019487	753.662	439.063	0.77949	1.2396e-05	0.00020705	Trip10	AH/BAR domain superfamily||FCH domain||F-BAR domain||SH3-like domain superfamily||Cdc42-interacting protein 4||SH3 domain||-
ENSMUSG00000019558	14119.7	10441.6	0.43536	2.4819e-08	6.7712e-07	Slc6a8	-||Sodium:neurotransmitter symporter, creatine||Sodium:neurotransmitter symporter||Sodium:neurotransmitter symporter superfamily
ENSMUSG00000019577	1719.61	411.593	2.0628	3.9547e-14	2.038e-12	Pdk4	Histidine kinase domain||Branched-chain alpha-ketoacid dehydrogenase kinase/Pyruvate dehydrogenase kinase, N-terminal||Histidine kinase/HSP90-like ATPase||Alpha-ketoacid/pyruvate dehydrogenase kinase, N-terminal domain superfamily||Histidine kinase/HSP90-like ATPase superfamily
ENSMUSG00000019579	1765.22	1311.87	0.42822	1.6752e-05	0.00027138	Mydgf	Myeloid-derived growth factor
ENSMUSG00000019731	2878.7	2230.05	0.36834	4.0751e-05	0.00060304	Slc35e1	Sugar phosphate transporter domain
ENSMUSG00000019763	613.588	775.139	-0.33718	0.0030644	0.026421	Rmnd1	Domain of unknown function DUF155||-
ENSMUSG00000019782	1007.02	793.258	0.34423	0.0013803	0.013376	Rwdd1	Ubiquitin-conjugating enzyme/RWD-like||RWD domain||ZC3H15/TMA46 family, C-terminal
ENSMUSG00000019814	1000.65	676.56	0.56464	3.2622e-07	7.3831e-06	Ltv1	Low temperature viability protein
ENSMUSG00000019817	1399.8	971.142	0.52747	1.6454e-07	3.915e-06	Plagl1	Zinc finger protein PLAGL1||Zinc finger C2H2 superfamily||Zinc finger C2H2-type||-
ENSMUSG00000019832	192.013	105.345	0.86608	2.8065e-05	0.00043349	Rab32	-||P-loop containing nucleoside triphosphate hydrolase||Small GTPase superfamily||Small GTP-binding protein domain||Ras-related protein Rab29/Rab38/Rab32
ENSMUSG00000019846	705.918	206.967	1.7701	0.00040769	0.0047078	Lama4	Laminin alpha, domain I||Concanavalin A-like lectin/glucanase domain superfamily||EGF-like domain||Laminin EGF domain||Laminin G domain||Laminin domain II
ENSMUSG00000019849	1934.62	1435.9	0.43009	4.1995e-06	7.7364e-05	Prep	Peptidase S9A, prolyl oligopeptidase||Peptidase S9, serine active site||Peptidase S9A, N-terminal domain||Alpha/Beta hydrolase fold||Peptidase S9, prolyl oligopeptidase, catalytic domain
ENSMUSG00000019850	338.202	144.925	1.2226	7.0854e-13	3.2728e-11	Tnfaip3	Zinc finger, A20-type||OTU domain||A20 peptidase
ENSMUSG00000019851	272.498	136.511	0.99723	0.005559	0.043589	Perp	P53-induced protein||PMP-22/EMP/MP20/Claudin superfamily
ENSMUSG00000019866	101.675	28.0767	1.8565	1.6748e-09	5.2651e-08	Crybg1	Gamma-crystallin-like||Beta/gamma crystallin||Ricin B, lectin domain||Ricin B-like lectins
ENSMUSG00000019889	2078.76	1438.35	0.5313	3.0541e-08	8.1809e-07	Ptprk	Fibronectin type III superfamily||PTP type protein phosphatase||Protein-tyrosine phosphatase, active site||Cytochrome c1, transmembrane anchor, C-terminal||Immunoglobulin subtype||Immunoglobulin-like domain||Tyrosine specific protein phosphatases domain||Protein-tyrosine phosphatase-like||MAM domain||Immunoglobulin-like domain superfamily||Fibronectin type III||Immunoglobulin-like fold||Protein-t…
ENSMUSG00000019894	2297.78	2722.31	-0.24459	0.0046471	0.037597	Slc6a15	Sodium:neurotransmitter symporter superfamily||Sodium:neurotransmitter symporter||Sodium:neurotransmitter symporter, orphan
ENSMUSG00000019920	1812.41	1502.96	0.2701	0.0037099	0.031104	Lims1	LIM and senescent cell antigen-like-containing domain protein 1||Zinc finger, LIM-type
ENSMUSG00000019947	2668.98	1203.49	1.1491	8.5524e-33	1.3344e-30	Arid5b	ARID DNA-binding domain superfamily||AT-rich interactive domain-containing protein 5B||-||ARID DNA-binding domain
ENSMUSG00000019951	2964.37	2468.78	0.26393	0.0024974	0.02226	Uhrf1bp1l	UHRF1-binding protein 1-like||-||Vacuolar protein sorting-associated protein 13, N-terminal domain
ENSMUSG00000019960	1559.18	777.557	1.0038	1.4086e-22	1.3359e-20	Dusp6	Mitogen-activated protein (MAP) kinase phosphatase||Tyrosine specific protein phosphatases domain||Dual specificity protein phosphatase domain||Protein-tyrosine phosphatase-like||Rhodanese-like domain||Dual specificity phosphatase||Rhodanese-like domain superfamily||Dual specificity phosphatase, catalytic domain
ENSMUSG00000019961	1872	1563.01	0.26025	0.0053265	0.042107	Tmpo	Lamina-associated polypeptide 2 alpha||LEM domain||LEM/LEM-like domain superfamily||LEM-like domain
ENSMUSG00000019966	1363.98	780.279	0.80576	2.2281e-14	1.1696e-12	Kitl	Stem cell factor||Four-helical cytokine-like, core
ENSMUSG00000019970	13691.6	2718.4	2.3325	1.1183e-20	9.5138e-19	Sgk1	Serine/threonine-protein kinase, active site||PX domain superfamily||AGC-kinase, C-terminal||Protein kinase, C-terminal||Protein kinase-like domain superfamily||-||Protein kinase, ATP binding site||Protein kinase domain
ENSMUSG00000019987	264.418	11.1086	4.5731	3.9339e-20	3.2566e-18	Arg1	Arginase||Ureohydrolase, manganese-binding site||Ureohydrolase domain superfamily||Ureohydrolase
ENSMUSG00000019988	251.6	155.57	0.69357	0.00015408	0.0020003	Nedd1	WD40 repeat||WD40 repeat, conserved site||WD40-repeat-containing domain superfamily||-||WD40-repeat-containing domain||WD40/YVTN repeat-like-containing domain superfamily
ENSMUSG00000019989	76.2254	148.818	-0.96521	0.00011827	0.0015809	Enpp3	Alkaline phosphatase-like, alpha/beta/alpha||Extracellular Endonuclease, subunit A||-||Somatomedin B domain||Somatomedin B-like domain superfamily||DNA/RNA non-specific endonuclease||Type I phosphodiesterase/nucleotide pyrophosphatase/phosphate transferase||Alkaline-phosphatase-like, core domain superfamily
ENSMUSG00000019990	576.865	759.84	-0.39746	0.0005867	0.0064327	Pde7b	3'5'-cyclic nucleotide phosphodiesterase||-||HD/PDEase domain||3'5'-cyclic nucleotide phosphodiesterase, conserved site||3'5'-cyclic nucleotide phosphodiesterase, catalytic domain||3'5'-cyclic nucleotide phosphodiesterase, catalytic domain superfamily
ENSMUSG00000019997	1475.66	298.836	2.3039	2.8759e-10	9.9767e-09	Ctgf	Insulin-like growth factor binding protein, N-terminal, Cys-rich conserved site||Thrombospondin type-1 (TSP1) repeat||IGFBP-related, CNN||Thrombospondin type-1 (TSP1) repeat superfamily||VWFC domain||Glycoprotein hormone subunit beta||Insulin-like growth factor-binding protein, IGFBP||Growth factor receptor cysteine-rich domain superfamily||Cystine knot, C-terminal
ENSMUSG00000020009	1207.39	703.224	0.77983	2.9623e-13	1.4166e-11	Ifngr1	-||Interferon gamma receptor, poxvirus/mammal||Fibronectin type III superfamily||Interferon gamma receptor alpha subunit||Immunoglobulin-like fold||Fibronectin type III
ENSMUSG00000020014	101.588	167.128	-0.71823	0.0052239	0.041454	Cfap54	Tetratricopeptide-like helical domain superfamily||-||Cilia- and flagella-associated protein 54
ENSMUSG00000020017	15.7601	0.954403	4.0455	0.00042827	0.0049121	Hal	L-Aspartase-like||Fumarase/histidase, N-terminal||-||Par3/HAL, N-terminal||Histidine ammonia-lyase||Aromatic amino acid lyase||Phenylalanine/histidine ammonia-lyases, active site
ENSMUSG00000020021	693.124	536.465	0.36963	0.0017728	0.016559	Fgd6	FYVE zinc finger||PH-like domain superfamily||Zinc finger, FYVE-related||Zinc finger, RING/FYVE/PHD-type||Dbl homology (DH) domain superfamily||Dbl homology (DH) domain||Pleckstrin homology domain
ENSMUSG00000020027	780.086	335.95	1.2154	3.3738e-22	3.1468e-20	Socs2	-||SH2 domain superfamily||SOCS2, SH2 domain||Suppressor of cytokine signalling 2||SH2 domain||SOCS box domain||SOCS box-like domain superfamily
ENSMUSG00000020029	11138.9	9524.34	0.22592	0.0047915	0.038682	Nudt4	NUDIX hydrolase domain||NUDIX hydrolase, conserved site||NUDIX hydrolase-like domain superfamily
ENSMUSG00000020037	650.171	1219.05	-0.90686	3.0003e-17	2.0036e-15	Rfx4	Winged helix DNA-binding domain superfamily||Winged helix-like DNA-binding domain superfamily||-||DNA-binding RFX-type winged-helix domain
ENSMUSG00000020038	1009.9	618.892	0.70645	2.0628e-10	7.23e-09	Cry1	Rossmann-like alpha/beta/alpha sandwich fold||DNA photolyase, N-terminal||Cryptochrome/photolyase, N-terminal domain superfamily||Cryptochrome/DNA photolyase, FAD-binding domain-like superfamily||Cryptochrome/DNA photolyase, FAD-binding domain
ENSMUSG00000020052	134.564	214.748	-0.67435	0.0011506	0.011496	Ascl1	Helix-loop-helix DNA-binding domain superfamily||Achaete-scute transcription factor-related||Myc-type, basic helix-loop-helix (bHLH) domain
ENSMUSG00000020063	485.836	376.489	0.36786	0.0061752	0.047307	Sirt1	Sirtuin family||-||Sirtuin family, catalytic core domain||DHS-like NAD/FAD-binding domain superfamily
ENSMUSG00000020070	2106.18	2488.94	-0.2409	0.0062263	0.047611	Rufy2	-||FYVE zinc finger||Zinc finger, RING/FYVE/PHD-type||Zinc finger, FYVE-related||Zinc finger, FYVE/PHD-type||RUN domain superfamily||RUN domain
ENSMUSG00000020074	2131.88	1629.53	0.38767	2.9472e-05	0.00045337	Ccar1	EF-hand domain pair||Nucleic acid-binding, OB-fold||Cell cycle and apoptosis regulator protein||S1-like RNA binding domain||SAP domain superfamily||SAP domain||-||DBC1/CARP1 catalytically inactive NUDIX hydrolase domain
ENSMUSG00000020075	3778.05	1465.99	1.3658	1.6375e-52	5.4893e-50	Ddx21	Helicase superfamily 1/2, ATP-binding domain||Helicase, C-terminal||DEAD/DEAH box helicase domain||RNA-binding domain superfamily||RNA helicase, DEAD-box type, Q motif||P-loop containing nucleoside triphosphate hydrolase||GUCT
ENSMUSG00000020077	2936.01	259.765	3.4986	2.1476e-21	1.9085e-19	Srgn	Serglycin||-
ENSMUSG00000020088	6966.24	5503.48	0.34004	2.752e-05	0.00042619	Sar1a	P-loop containing nucleoside triphosphate hydrolase||-||Small GTP-binding protein domain||Small GTPase superfamily, SAR1-type||Small GTPase superfamily, ARF/SAR type
ENSMUSG00000020091	2835.5	2117.87	0.42099	1.4272e-06	2.8832e-05	Eif4ebp2	Eukaryotic translation initiation factor 4E binding
ENSMUSG00000020097	2006.61	1536.33	0.38527	3.5352e-05	0.0005315	Sgpl1	Pyridoxal phosphate-dependent transferase, subdomain 2||Pyridoxal phosphate-dependent transferase||Pyridoxal phosphate-dependent decarboxylase||Pyridoxal phosphate-dependent transferase, major region, subdomain 1||-
ENSMUSG00000020099	4766.2	6778.39	-0.5081	1.0205e-09	3.3e-08	Unc5b	ZU5 domain||UPA domain||Death domain||Immunoglobulin-like domain||Immunoglobulin I-set||Immunoglobulin-like fold||Death-like domain superfamily||Immunoglobulin subtype 2||Thrombospondin type-1 (TSP1) repeat superfamily||Immunoglobulin subtype||Thrombospondin type-1 (TSP1) repeat||Immunoglobulin-like domain superfamily
ENSMUSG00000020101	1011.76	1360.81	-0.42759	0.0024479	0.021915	Vsir	Immunoglobulin-like domain||Immunoglobulin-like domain superfamily||Immunoglobulin subtype||Immunoglobulin V-set domain||Immunoglobulin-like fold
ENSMUSG00000020108	5406.44	3060.5	0.82091	5.8492e-07	1.2728e-05	Ddit4	RTP801-like
ENSMUSG00000020116	1199.63	926.292	0.37305	0.00036895	0.004327	Pno1	K Homology domain||K Homology domain, type 1 superfamily
ENSMUSG00000020120	1431.88	493.57	1.5366	9.3283e-37	1.7644e-34	Plek	Winged helix DNA-binding domain superfamily||Winged helix-like DNA-binding domain superfamily||Pleckstrin||DEP domain||Pleckstrin homology domain||PH-like domain superfamily||Pleckstrin 1, DEP domain
ENSMUSG00000020121	1630.44	1300.35	0.32636	0.00070392	0.007544	Srgap1	srGAP1/2/3, SH3 domain||F-BAR domain||Rho GTPase-activating protein domain||AH/BAR domain superfamily||SLIT-ROBO Rho GTPase-activating protein 1, F-BAR domain||FCH domain||SH3-like domain superfamily||Rho GTPase activation protein||SH3 domain
ENSMUSG00000020130	2045.64	1609.98	0.34551	0.000213	0.002668	Tbc1d15	Rab-GTPase-TBC domain superfamily||Rab-GTPase-TBC domain||Domain of unknown function DUF3548
ENSMUSG00000020131	75.023	155.44	-1.051	0.00037342	0.0043702	Pcsk4	Peptidase S8, subtilisin, Asp-active site||Peptidase S8/S53 domain superfamily||Peptidase S8/S53 domain||Kexin/furin catalytic domain||Peptidase S8, subtilisin, Ser-active site||Peptidase S8, subtilisin-related||Peptidase S8, subtilisin, His-active site||Protease propeptides/proteinase inhibitor I9||-||Galactose-binding-like domain superfamily||P domain||Peptidase S8, pro-domain
ENSMUSG00000020132	4688.74	3710.94	0.33741	6.5734e-05	0.00092967	Rab21	P-loop containing nucleoside triphosphate hydrolase||Small GTPase superfamily||Small GTP-binding protein domain
ENSMUSG00000020134	1532.42	1133.31	0.43527	1.4297e-05	0.00023526	Peli1	Zinc finger, RING/FYVE/PHD-type||Pellino family
ENSMUSG00000020135	13062.2	16429.2	-0.33086	0.0036932	0.031013	Apc2	Adenomatous polyposis coli protein||Adenomatous polyposis coli protein basic domain||SAMP||Adenomatous polyposis coli 2||Adenomatous polyposis coli protein repeat||Armadillo-type fold||Armadillo||Armadillo-like helical||APC, N-terminal coiled-coil domain superfamily||Adenomatous polyposis coli, N-terminal dimerisation domain||Adenomatous polyposis coli (APC) family
ENSMUSG00000020137	695.77	552.58	0.33243	0.0043068	0.035248	Thap2	Zinc finger, C2CH-type||THAP domain-containing protein 2||-
ENSMUSG00000020142	3821.66	3157.48	0.27543	0.0011161	0.011219	Slc1a4	Sodium:dicarboxylate symporter||Sodium:dicarboxylate symporter, conserved site||Sodium:dicarboxylate symporter superfamily
ENSMUSG00000020154	1279.17	755.831	0.75907	0.00022098	0.0027517	Ptprb	PTP type protein phosphatase||Protein-tyrosine phosphatase, active site||Fibronectin type III superfamily||Ricin B, lectin domain||Protein-tyrosine phosphatase, catalytic||Immunoglobulin-like fold||Ricin B-like lectins||Fibronectin type III||Protein-tyrosine phosphatase-like||Tyrosine specific protein phosphatases domain
ENSMUSG00000020156	1795.57	2336.04	-0.37962	4.389e-05	0.00064722	Mum1	PWWP domain-containing protein MUM1||MUM1-like, PWWP domain
ENSMUSG00000020181	1465.58	1181.25	0.31116	0.0017062	0.016038	Nav3	Calponin homology domain||Calponin-like domain superfamily||P-loop containing nucleoside triphosphate hydrolase||ATPase, AAA-type, core||AAA+ ATPase domain
ENSMUSG00000020182	1242.37	637.01	0.96371	5.7919e-19	4.3969e-17	Ddc	Pyridoxal-phosphate binding site||Aromatic-L-amino-acid decarboxylase||Pyridoxal phosphate-dependent decarboxylase||Pyridoxal phosphate-dependent transferase, major region, subdomain 1||Pyridoxal phosphate-dependent transferase, subdomain 2||Pyridoxal phosphate-dependent transferase
ENSMUSG00000020184	2302.22	1494.24	0.62361	1.4542e-11	5.725e-10	Mdm2	Ubiquitin-protein ligase E3 MDM2||Zinc finger, RanBP2-type superfamily||SWIB/MDM2 domain||p53 negative regulator Mdm2/Mdm4||-||SWIB/MDM2 domain superfamily||Zinc finger, RING/FYVE/PHD-type||Zinc finger, RanBP2-type||E3 ubiquitin-protein ligase Mdm2||Zinc finger, RING-type
ENSMUSG00000020190	1873.6	1512.54	0.30883	0.00071614	0.0076513	Mknk2	Protein kinase domain||-||Protein kinase, ATP binding site||Protein kinase-like domain superfamily||Serine/threonine-protein kinase, active site
ENSMUSG00000020205	686.261	344.036	0.9962	3.3022e-11	1.2605e-09	Phlda1	PH-like domain superfamily||Pleckstrin homology domain
ENSMUSG00000020211	1616.21	1244.35	0.37723	0.00010322	0.0014013	Sf3a2	SF3A2 domain||Zinc finger C2H2 superfamily||Matrin/U1-C, C2H2-type zinc finger||-||Matrin/U1-C-like, C2H2-type zinc finger
ENSMUSG00000020224	1914.74	1511.47	0.34119	0.00031194	0.0037421	Llph	Learning associated protein 18-like||-
ENSMUSG00000020227	280.093	74.9434	1.902	1.0853e-21	9.7994e-20	Irak3	Death-like domain superfamily||Interleukin-1 receptor-associated kinase 3||Death domain||Protein kinase domain||-||Protein kinase-like domain superfamily
ENSMUSG00000020230	2958.33	3671.46	-0.31157	0.00027755	0.0033683	Prmt2	Methyltransferase small domain||S-adenosyl-L-methionine-dependent methyltransferase||SH3 domain||-||Protein arginine N-methyltransferase||SH3-like domain superfamily
ENSMUSG00000020231	4800.26	7969.74	-0.73142	3.5534e-19	2.7406e-17	Dip2a	AMP-dependent synthetase/ligase||DMAP1-binding domain||-
ENSMUSG00000020250	6598	3595.06	0.87601	1.0819e-19	8.7429e-18	Txnrd1	Thioredoxin/glutathione reductase selenoprotein||Pyridine nucleotide-disulphide oxidoreductase, class I||FAD/NAD-linked reductase, dimerisation domain superfamily||Pyridine nucleotide-disulphide oxidoreductase, class I, active site||Pyridine nucleotide-disulphide oxidoreductase, dimerisation domain||FAD/NAD(P)-binding domain superfamily||FAD/NAD(P)-binding domain
ENSMUSG00000020255	3027.34	2223.33	0.44533	4.9346e-07	1.087e-05	D10Wsu102e	Protein of unknown function DUF4598
ENSMUSG00000020263	2732.61	4541.18	-0.73279	1.1934e-17	8.1963e-16	Appl2	PH-like domain superfamily||-||AH/BAR domain superfamily||Pleckstrin homology domain||PTB/PI domain
ENSMUSG00000020271	8693.95	6871.83	0.33932	2.5221e-05	0.00039351	Fbxw11	WD40 repeat, conserved site||WD40 repeat||WD40-repeat-containing domain superfamily||G-protein beta WD-40 repeat||-||WD40-repeat-containing domain||WD40/YVTN repeat-like-containing domain superfamily||F-box domain||F-box-like domain superfamily||D domain of beta-TrCP
ENSMUSG00000020272	542.744	681.083	-0.32756	0.0062672	0.047845	Stk10	Protein kinase-like domain superfamily||Polo kinase kinase||Protein kinase domain||Protein kinase, ATP binding site||Serine/threonine-protein kinase, active site
ENSMUSG00000020275	338.343	215.264	0.65238	0.00018647	0.0023696	Rel	Immunoglobulin E-set||Proto-oncogene c-Rel||NF-kappa-B/Dorsal||Rel homology domain, conserved site||p53-like transcription factor, DNA-binding||NFkappaB IPT domain||Rel homology domain (RHD), DNA-binding domain superfamily||Rel homology domain (RHD), DNA-binding domain||IPT domain||Immunoglobulin-like fold||Rel homology dimerisation domain
ENSMUSG00000020282	1933.19	1093.59	0.82191	1.512e-09	4.7756e-08	Rhbdf1	Peptidase S54, rhomboid domain||-||Peptidase S54, rhomboid||Rhomboid serine protease||Rhomboid-like superfamily
ENSMUSG00000020284	1461.93	1791.51	-0.2933	0.0021804	0.01984	1810043G02Rik	Protein C21orf2||Leucine-rich repeat domain superfamily||Leucine-rich repeat
ENSMUSG00000020300	4306.35	3450.67	0.31959	0.0016096	0.015274	Cpeb4	Cytoplasmic polyadenylation element-binding protein||RNA recognition motif domain||RNA-binding domain superfamily||Cytoplasmic polyadenylation element-binding protein, ZZ domain
ENSMUSG00000020307	2035.47	1691.56	0.26701	0.0034808	0.029507	Cdc34	Ubiquitin-conjugating enzyme/RWD-like||Ubiquitin-conjugating enzyme, active site||Ubiquitin-conjugating enzyme E2||-
ENSMUSG00000020312	2431.8	3005.68	-0.30566	0.00057288	0.0062976	Shc2	SH2 domain superfamily||PH-like domain superfamily||SHC-transforming protein 2||SH2 adaptor protein C, SH2 domain||Phosphotyrosine interaction domain, Shc-like||SH2 domain||PTB/PI domain
ENSMUSG00000020325	217.643	38.8357	2.4865	4.8124e-08	1.2486e-06	Fstl3	TB domain||Kazal domain superfamily||Kazal domain||TGF-beta binding (TB) domain superfamily||Follistatin-like, N-terminal||Follistatin/Osteonectin EGF domain
ENSMUSG00000020326	2568.88	1471.17	0.80417	3.8521e-10	1.3161e-08	Ccng1	Cyclin, N-terminal||Cyclin-G1||Cyclin-like superfamily||Cyclin-like
ENSMUSG00000020328	775.975	587.563	0.40127	0.00060054	0.0065627	Nudcd2	HSP20-like chaperone||CS domain
ENSMUSG00000020331	16149.3	18865.3	-0.22426	0.0054464	0.042905	Hcn2	Cyclic nucleotide-binding-like||RmlC-like jelly roll fold||Potassium channel, voltage-dependent, EAG/ELK/ERG||Cyclic nucleotide-binding domain||Ion transport N-terminal||Ion transport domain||Cyclic nucleotide-binding, conserved site
ENSMUSG00000020334	1659.77	1270.79	0.38525	0.00012302	0.0016353	Slc22a4	Major facilitator superfamily domain||Sugar transporter, conserved site||Major facilitator, sugar transporter-like||Organic cation transport protein/SVOP||MFS transporter superfamily
ENSMUSG00000020357	421.596	171.165	1.3005	1.0756e-16	6.963e-15	Flt4	Tyrosine-protein kinase, catalytic domain||Protein kinase, ATP binding site||Protein kinase domain||Immunoglobulin-like domain||Immunoglobulin I-set||Serine-threonine/tyrosine-protein kinase, catalytic domain||Protein kinase-like domain superfamily||Tyrosine-protein kinase, receptor class III, conserved site||Vascular endothelial growth factor receptor 3 (VEGFR3)||Tyrosine-protein kinase, active …
ENSMUSG00000020358	5568.93	3269.72	0.76823	5.902e-20	4.8268e-18	Hnrnpab	RNA recognition motif domain||hnRNPAB, RNA recognition motif 1||RNA-binding domain superfamily||CARG-binding factor, N-terminal
ENSMUSG00000020361	9393.03	7948.09	0.24098	0.0029134	0.02529	Hspa4	Heat shock protein 70, conserved site||Heat shock protein 70kD, peptide-binding domain superfamily||Heat shock protein 70kD, C-terminal domain superfamily||Heat shock protein 70 family
ENSMUSG00000020362	1822.12	1268.46	0.52254	2.7817e-08	7.5047e-07	Cnot6	Leucine-rich repeat, typical subtype||Endonuclease/exonuclease/phosphatase||Leucine-rich repeat domain superfamily||CCR4-NOT transcription complex subunit 6||Endonuclease/exonuclease/phosphatase superfamily||Leucine-rich repeat
ENSMUSG00000020363	730.402	134.436	2.4418	3.6665e-14	1.8953e-12	Gfpt2	Glutamine amidotransferase type 2 domain||Glucosamine-fructose-6-phosphate aminotransferase, isomerising||Sugar isomerase (SIS)||GlmS/FrlB, SIS domain 2||GlmS/AgaS, SIS domain 1||Nucleophile aminohydrolases, N-terminal
ENSMUSG00000020372	7018.75	4938.08	0.50727	5.0033e-10	1.6873e-08	Rack1	WD40 repeat, conserved site||WD40 repeat||WD40-repeat-containing domain superfamily||WD40-repeat-containing domain||G-protein beta WD-40 repeat||WD40/YVTN repeat-like-containing domain superfamily
ENSMUSG00000020374	808.497	374.035	1.1121	3.8647e-19	2.9672e-17	Rasgef1c	Ras guanine-nucleotide exchange factor catalytic domain superfamily||Ras guanine nucleotide exchange factor domain superfamily||Ras guanine-nucleotide exchange factor, conserved site||Ras guanine-nucleotide exchange factors catalytic domain||Ras-like guanine nucleotide exchange factor, N-terminal
ENSMUSG00000020381	186.915	307.452	-0.71797	1.9696e-05	0.00031471	Mrnip	-||MRN complex-interacting protein
ENSMUSG00000020387	3820.79	2100.26	0.8633	4.9512e-23	4.7896e-21	Jade2	Zinc finger, PHD-finger||Zinc finger, PHD-type, conserved site||Extended PHD (ePHD) domain||Zinc finger, FYVE/PHD-type||Zinc finger, RING/FYVE/PHD-type||Zinc finger, PHD-type||Enhancer of polycomb-like, N-terminal
ENSMUSG00000020388	1710.32	540.768	1.6612	2.4492e-32	3.7354e-30	Pdlim4	Zinc finger, LIM-type||Domain of unknown function DUF4749||-||PDZ superfamily||PDZ domain
ENSMUSG00000020393	1046.03	849.989	0.29941	0.0045588	0.036971	Kremen1	Kringle-like fold||Spermadhesin, CUB domain superfamily||Kringle, conserved site||Kremen||Kringle||CUB domain||Carbohydrate-binding WSC
ENSMUSG00000020397	513.778	369.201	0.47674	0.00046721	0.0052923	Med7	Mediator complex, subunit Med7/Med21-like||Mediator complex, subunit Med7
ENSMUSG00000020399	148.141	77.1642	0.94097	9.638e-05	0.0013179	Havcr2	Immunoglobulin-like fold||Immunoglobulin V-set domain||Immunoglobulin subtype||Immunoglobulin-like domain||Immunoglobulin-like domain superfamily
ENSMUSG00000020407	304.188	84.404	1.8496	4.0969e-22	3.8003e-20	Upp1	Uridine phosphorylase, eukaryotic||Nucleoside phosphorylase superfamily||Nucleoside phosphorylase, conserved site||Nucleoside phosphorylase domain
ENSMUSG00000020411	663.701	1006.06	-0.60011	9.0045e-08	2.2401e-06	Nipal4	Magnesium transporter NIPA
ENSMUSG00000020423	1559.7	250.933	2.6359	1.3651e-38	2.7677e-36	Btg2	BTG domain-like superfamily||Protein BTG2||Anti-proliferative protein
ENSMUSG00000020427	3426.33	632.044	2.4386	0.00066658	0.0071945	Igfbp3	Insulin-like growth factor binding protein||Insulin-like growth factor binding protein, N-terminal, Cys-rich conserved site||Growth factor receptor cysteine-rich domain superfamily||Thyroglobulin type-1 superfamily||Thyroglobulin type-1||Insulin-like growth factor-binding protein, IGFBP||Insulin-like growth factor binding protein 3||Insulin-like growth factor-binding protein family 1-6, chordata
ENSMUSG00000020430	2398.97	1725.13	0.47571	2.8034e-07	6.4221e-06	Pes1	BRCT domain||BRCT domain superfamily||Pescadillo
ENSMUSG00000020437	89.8336	41.9006	1.1003	0.00017235	0.0022088	Myo1g	Class I myosin tail homology domain||-||P-loop containing nucleoside triphosphate hydrolase||Myosin head, motor domain||Class I myosin, motor domain
ENSMUSG00000020439	443.916	221.56	1.0026	4.5237e-08	1.1827e-06	Smtn	Smoothelin||Calponin-like domain superfamily||Calponin homology domain
ENSMUSG00000020474	244.557	362.669	-0.56848	0.00029214	0.0035226	Polm	DNA polymerase, thumb domain superfamily||DNA nucleotidylexotransferase (TdT) / DNA-directed DNA/RNA polymerase mu||DNA-directed DNA polymerase X||DNA polymerase lambda, fingers domain||DNA polymerase beta, palm domain||DNA polymerase lambda lyase domain superfamily||DNA-directed DNA/RNA polymerase mu||DNA polymerase family X||DNA polymerase beta-like, N-terminal domain||DNA polymerase beta, thum…
ENSMUSG00000020484	4303.36	1970.05	1.1272	2.1124e-15	1.2268e-13	Xbp1	Basic-leucine zipper domain||Transcription factor, Skn-1-like, DNA-binding domain superfamily
ENSMUSG00000020486	15418.6	24083.1	-0.64335	1.6929e-07	4.0196e-06	Sept4	Septin 4||Septin-type guanine nucleotide-binding (G) domain||P-loop containing nucleoside triphosphate hydrolase||Septin
ENSMUSG00000020520	2357.08	1644.32	0.51951	9.4982e-09	2.7486e-07	Galnt10	Ricin B, lectin domain||-||Glycosyltransferase 2-like||Nucleotide-diphospho-sugar transferases||Ricin B-like lectins
ENSMUSG00000020522	778.869	613.077	0.34531	0.0029474	0.025548	Mfap3	Immunoglobulin-like domain||Immunoglobulin-like domain superfamily||Immunoglobulin||Immunoglobulin subtype||Immunoglobulin-like fold||Immunoglobulin subtype 2
ENSMUSG00000020532	7154.25	5158.11	0.47196	8.0118e-09	2.3358e-07	Acaca	Acetyl-CoA carboxylase||Rudiment single hybrid motif||Acetyl-CoA carboxylase, central domain||Biotin/lipoyl attachment||Biotin carboxylase-like, N-terminal domain||Single hybrid motif||Acetyl-coenzyme A carboxyltransferase, N-terminal||Biotin carboxylation domain||ATP-grasp fold||Biotin carboxylase, C-terminal||Acetyl-coenzyme A carboxyltransferase, C-terminal||Pre-ATP-grasp domain superfamily||C…
ENSMUSG00000020536	3502.72	4795.24	-0.45313	1.8902e-06	3.7123e-05	Llgl1	Lethal giant larvae homologue 2||WD40-repeat-containing domain superfamily||Lethal(2) giant larvae protein||WD40 repeat, conserved site||WD40 repeat||Lethal giant larvae (Lgl)-like, C-terminal domain||WD40/YVTN repeat-like-containing domain superfamily
ENSMUSG00000020538	3191.01	5698.6	-0.83659	3.4058e-23	3.3619e-21	Srebf1	Helix-loop-helix DNA-binding domain superfamily||Myc-type, basic helix-loop-helix (bHLH) domain
ENSMUSG00000020541	700.218	1089.89	-0.63831	1.7844e-05	0.00028797	Tom1l1	ENTH/VHS||GAT domain||Target of Myb protein 1||VHS domain||TOM1-like protein 1
ENSMUSG00000020544	623.329	828.041	-0.40971	0.003972	0.03293	Cox11	Cytochrome c oxidase assembly protein CtaG/Cox11, domain superfamily||Cytochrome c oxidase assembly protein CtaG/Cox11
ENSMUSG00000020547	739.095	540.218	0.45222	0.00012857	0.0017017	Bzw2	W2 domain||Armadillo-type fold||-
ENSMUSG00000020549	1965.77	1375.72	0.51491	4.2946e-08	1.1289e-06	Elac2	Metallo-hydrolase/oxidoreductase superfamily||Metallo-beta-lactamase||-||tRNase Z endonuclease
ENSMUSG00000020561	820.265	619.101	0.40592	0.00045355	0.0051617	Twistnb	RNA polymerase Rpb7, N-terminal
ENSMUSG00000020570	3717.35	4759.3	-0.35648	0.0014503	0.013964	Sypl	Synaptophysin/synaptoporin||Marvel domain||-
ENSMUSG00000020571	4938	4165.53	0.24543	0.0035093	0.029719	Pdia6	Thioredoxin domain||Disulphide isomerase||Thioredoxin, conserved site||Thioredoxin-like superfamily
ENSMUSG00000020572	2540.63	1937.35	0.39111	1.3586e-05	0.0002245	Nampt	Nicotinate phosphoribosyltransferase-like, C-terminal||Nicotinate phosphoribosyltransferase family||Nicotinamide phosphoribosyl transferase||-
ENSMUSG00000020576	2058.09	2772.9	-0.43009	9.9463e-07	2.0762e-05	Nbas	Quinoprotein amine dehydrogenase, beta chain-like||WD40/YVTN repeat-like-containing domain superfamily||Sec39 domain||Neuroblastoma-amplified sequence, N-terminal
ENSMUSG00000020580	4824.36	3812.96	0.33943	6.1797e-05	0.00087691	Rock2	Protein kinase, ATP binding site||Protein kinase domain||Rho-associated protein kinase 2, HR1 domain||Protein kinase-like domain superfamily||Rho binding domain||Rho-associated protein kinase 1/2||Rho-associated protein kinase 2||AGC-kinase, C-terminal||PH-like domain superfamily||Serine/threonine-protein kinase, active site||Protein kinase C-like, phorbol ester/diacylglycerol-binding domain||Ple…
ENSMUSG00000020589	2869.16	2264.99	0.34113	0.00011999	0.0016001	Fam49a	Protein of unknown function DUF1394
ENSMUSG00000020591	5520.5	6654.69	-0.26957	0.0010403	0.010555	Ntsr2	G protein-coupled receptor, rhodopsin-like||Neurotensin receptor||GPCR, rhodopsin-like, 7TM||Neurotensin type 2 receptor
ENSMUSG00000020592	631.407	206.738	1.6108	3.3937e-10	1.1665e-08	Sdc1	Syndecan, conserved site||Syndecan-1||Syndecan/Neurexin domain||Syndecan||Neurexin/syndecan/glycophorin C
ENSMUSG00000020594	4986.55	4241.2	0.23357	0.0049461	0.039721	Pum2	Pumilio homology domain||Armadillo-type fold||Pumilio RNA-binding repeat||Pumilio, RNA binding domain||Armadillo-like helical||-
ENSMUSG00000020601	1590.14	1967.6	-0.30728	0.00079453	0.00837	Trib2	Protein kinase domain||Protein kinase-like domain superfamily||Pseudokinase tribbles family/serine-threonine-protein kinase 40
ENSMUSG00000020604	3103.49	4515.49	-0.54099	8.9779e-08	2.2365e-06	Arsg	Alkaline phosphatase-like, alpha/beta/alpha||Sulfatase, N-terminal||Sulfatase, conserved site||Alkaline-phosphatase-like, core domain superfamily
ENSMUSG00000020611	4216.29	3473.92	0.27941	0.00081992	0.0085824	Gna13	G protein alpha subunit, helical insertion||P-loop containing nucleoside triphosphate hydrolase||Guanine nucleotide binding protein (G-protein), alpha subunit||G-protein alpha subunit, group 12/13
ENSMUSG00000020620	641.513	880.711	-0.45719	4.038e-05	0.00059886	Abca8b	ABC transporter A||ABC transporter-like||ABC transporter, conserved site||AAA+ ATPase domain||P-loop containing nucleoside triphosphate hydrolase||Major facilitator superfamily domain
ENSMUSG00000020627	2479.72	1975.72	0.32781	0.00023566	0.0029227	Klhl29	BTB/Kelch-associated||SKP1/BTB/POZ domain superfamily||Kelch-type beta propeller||Kelch repeat type 1||BTB/POZ domain
ENSMUSG00000020639	169.485	295.728	-0.80312	2.3585e-06	4.5441e-05	Pfn4	Profilin||Profilin superfamily
ENSMUSG00000020641	391.704	32.3787	3.5966	3.1718e-32	4.7729e-30	Rsad2	Antiviral radical SAM protein viperin||Radical SAM||SPASM/twitch domain-containing||Aldolase-type TIM barrel||-||Elp3/MiaB/NifB
ENSMUSG00000020642	1884.61	1514.08	0.31582	0.0007066	0.0075661	Rnf144a	Zinc finger, RING-type||IBR domain||Zinc finger, RING-type, conserved site||E3 ubiquitin ligase RBR family
ENSMUSG00000020644	5248.92	3310.09	0.66515	8.0415e-11	2.9594e-09	Id2	Myc-type, basic helix-loop-helix (bHLH) domain||DNA-binding protein inhibitor||Helix-loop-helix DNA-binding domain superfamily
ENSMUSG00000020646	2434.97	2918.94	-0.26154	0.0024678	0.022075	Mboat2	Membrane bound O-acyl transferase, MBOAT||-
ENSMUSG00000020648	214.721	147.58	0.54097	0.0052114	0.041382	Dus4l	tRNA-dihydrouridine synthase||tRNA-dihydrouridine synthase, conserved site||Aldolase-type TIM barrel||DUS-like, FMN-binding domain
ENSMUSG00000020652	193.423	279.551	-0.53135	0.0017132	0.016098	Cenpo	Centromere protein O||-
ENSMUSG00000020658	13302.4	10491.5	0.34246	0.0004136	0.0047696	Efr3b	Armadillo-type fold||Armadillo-like helical||-
ENSMUSG00000020671	7139.49	6092.83	0.22871	0.00498	0.039908	Rab10	P-loop containing nucleoside triphosphate hydrolase||Small GTPase superfamily||Small GTP-binding protein domain
ENSMUSG00000020672	124.259	61.857	1.0063	5.3134e-05	0.00076841	Sntg2	-||Syntrophin||PH-like domain superfamily||PDZ domain||Pleckstrin homology domain||PDZ superfamily
ENSMUSG00000020676	308.885	25.0529	3.624	2.6026e-16	1.6409e-14	Ccl11	Chemokine interleukin-8-like domain||CC chemokine, conserved site||Chemokine interleukin-8-like superfamily
ENSMUSG00000020681	1638.49	1226.37	0.41797	9.5341e-06	0.00016312	Ace	Peptidase M2, peptidyl-dipeptidase A
ENSMUSG00000020696	1184.83	1818.17	-0.61782	1.4358e-10	5.1444e-09	Rffl	Zinc finger, RING/FYVE/PHD-type||Zinc finger, RING-type||Zinc finger, FYVE/PHD-type||SAP domain superfamily
ENSMUSG00000020700	976.626	764.645	0.35302	0.00076195	0.0080594	Map3k3	PB1 domain||Protein kinase-like domain superfamily||Protein kinase domain||Mitogen-activated protein kinase kinase kinase 2/3, PB1 domain
ENSMUSG00000020706	2359.48	1193.98	0.98269	1.4044e-25	1.585e-23	Ftsj3	AdoMet-dependent rRNA methyltransferase, Spb1||Ribosomal RNA methyltransferase Spb1, domain of unknown function DUF3381||S-adenosyl-L-methionine-dependent methyltransferase||Ribosomal RNA methyltransferase FtsJ domain||Ribosomal RNA methyltransferase, Spb1, C-terminal||Ribosomal RNA large subunit methyltransferase E
ENSMUSG00000020709	187.46	97.0521	0.94975	7.1798e-06	0.00012556	Adap2	Pleckstrin homology domain||ARFGAP/RecO-like zinc finger||-||PH-like domain superfamily||Arf GTPase activating protein
ENSMUSG00000020715	906.132	598.249	0.59898	1.5884e-06	3.1841e-05	Ern1	KEN domain||Pyrrolo-quinoline quinone beta-propeller repeat||Protein kinase domain||Protein kinase-like domain superfamily||Quinoprotein alcohol dehydrogenase-like superfamily||PUB domain||Serine/threonine-protein kinase, active site
ENSMUSG00000020717	1908.32	417.104	2.1938	8.027e-92	6.7944e-89	Pecam1	Immunoglobulin-like domain||Immunoglobulin-like domain superfamily||Immunoglobulin-like fold||Immunoglobulin subtype 2||Immunoglobulin subtype
ENSMUSG00000020723	1182.46	1526.29	-0.36824	0.00026161	0.0031926	Cacng4	Voltage-dependent calcium channel, gamma subunit||PMP-22/EMP/MP20/Claudin superfamily||Voltage-dependent calcium channel, gamma-4 subunit
ENSMUSG00000020743	849.059	1214.22	-0.5161	9.4948e-07	1.9893e-05	Mif4gd	MIF4G-like, type 3||Armadillo-type fold
ENSMUSG00000020747	2158.17	3256.97	-0.59372	9.1965e-06	0.00015798	Tmem94	P-type ATPase, transmembrane domain superfamily||-
ENSMUSG00000020758	3827.57	5493.86	-0.52139	0.0034519	0.029292	Itgb4	Integrin beta N-terminal||Fibronectin type III||EGF-like, conserved site||Immunoglobulin-like fold||Fibronectin type III superfamily||Na-Ca exchanger/integrin-beta4||Integrin beta subunit, VWA domain||Integrin beta subunit||Integrin beta subunit, tail||SEA domain superfamily||Integrin beta-4 subunit||Integrin beta tail domain superfamily||von Willebrand factor A-like domain superfamily
ENSMUSG00000020773	720.724	161.471	2.1582	1.0565e-20	9.0329e-19	Trim47	SPRY-associated||Zinc finger, RING-type||Concanavalin A-like lectin/glucanase domain superfamily||Zinc finger, RING-type, conserved site||Zinc finger, RING/FYVE/PHD-type||B30.2/SPRY domain||B-box-type zinc finger
ENSMUSG00000020774	977.056	2468	-1.3368	5.7492e-27	6.9027e-25	Aspa	Succinylglutamate desuccinylase/aspartoacylase||Aspartoacylase||-
ENSMUSG00000020776	1698.38	2148.1	-0.3389	0.00032245	0.003851	Fbf1	Fas-binding factor 1||-
ENSMUSG00000020805	196.646	314.892	-0.67925	4.3351e-05	0.00063983	Slc13a5	Solute carrier family 13||Sodium/sulphate symporter, conserved site
ENSMUSG00000020806	261.473	28.5096	3.1971	4.8138e-41	1.0448e-38	Rhbdf2	Rhomboid serine protease||Rhomboid-like superfamily||Peptidase S54, rhomboid||Peptidase S54, rhomboid domain
ENSMUSG00000020811	6176.27	7233.89	-0.22804	0.0057549	0.0447	Wscd1	-||P-loop containing nucleoside triphosphate hydrolase||Carbohydrate-binding WSC||Sulfotransferase domain
ENSMUSG00000020826	27.7749	8.17331	1.7648	0.0023714	0.021348	Nos2	FAD-binding, type 1||Flavodoxin-like||Nitric-oxide synthase, eukaryote||Oxidoreductase FAD/NAD(P)-binding||Flavoprotein pyridine nucleotide cytochrome reductase||Flavoprotein-like superfamily||Nitric oxide synthase, N-terminal domain superfamily||Nitric oxide synthase, N-terminal||Riboflavin synthase-like beta-barrel||Flavodoxin/nitric oxide synthase||Ferredoxin reductase-type FAD-binding domain
ENSMUSG00000020836	2788.4	5143.65	-0.88335	3.9796e-11	1.514e-09	Coro6	Coronin 6||WD40-repeat-containing domain superfamily||WD40 repeat||Coronin||WD40 repeat, conserved site||Domain of unknown function DUF1899||-||WD40/YVTN repeat-like-containing domain superfamily||WD40-repeat-containing domain
ENSMUSG00000020841	6058.5	7897.9	-0.38251	1.9086e-06	3.7438e-05	Cpd	Carboxypeptidase D, carboxypeptidase-like domain 1||Carboxypeptidase D, carboxypeptidase-like domain 3||Peptidase M14, carboxypeptidase A||Peptidase M14B, caboxypeptidase D||Carboxypeptidase D, carboxypeptidase-like domain 2||Carboxypeptidase-like, regulatory domain superfamily
ENSMUSG00000020844	2232.51	1555.93	0.52089	2.8081e-07	6.4284e-06	Nxn	Thioredoxin-like fold||Thioredoxin domain||Thioredoxin-like superfamily
ENSMUSG00000020846	1069.51	605.826	0.81998	2.0511e-10	7.1964e-09	Rflnb	Refilin family
ENSMUSG00000020847	110.683	51.9311	1.0918	5.425e-05	0.00078228	Rph3al	Rab effector Noc2||Zinc finger, FYVE-related||Zinc finger, RING/FYVE/PHD-type||Rab-binding domain||Zinc finger, FYVE/PHD-type
ENSMUSG00000020848	537.622	352.352	0.60957	3.9961e-06	7.4097e-05	Doc2b	C2 domain||C2 domain superfamily||Double C2-like domain-containing protein beta||Synaptotagmin||Double C2 protein, alpha/beta/gamma
ENSMUSG00000020859	16724.3	20484.4	-0.29258	0.00014752	0.0019248	Spag9	WD40-repeat-containing domain superfamily||RH2 domain||RH1 domain||WD40/YVTN repeat-like-containing domain superfamily||AH/BAR domain superfamily||JNK-interacting protein, leucine zipper II||JNK/Rab-associated protein-1, N-terminal
ENSMUSG00000020863	4189.54	5448.11	-0.37896	3.629e-06	6.811e-05	Luc7l3	-||Luc7-related
ENSMUSG00000020869	7664.59	5700.03	0.42724	1.2253e-07	2.9868e-06	Lrrc59	Leucine-rich repeat||Leucine-rich repeat domain superfamily||Leucine-rich repeat, typical subtype
ENSMUSG00000020873	1623.82	1307.52	0.31255	0.0011138	0.011204	Slc35b1	UAA transporter||-
ENSMUSG00000020877	268.112	459.787	-0.77813	4.4199e-08	1.1583e-06	Scrn2	Peptidase C69, dipeptidase A
ENSMUSG00000020888	933.444	1202.26	-0.36511	0.00050809	0.0056719	Dvl2	PDZ domain||Dishevelled protein domain||Dishevelled family||DIX domain||Winged helix DNA-binding domain superfamily||PDZ superfamily||Ubiquitin-like domain superfamily||Winged helix-like DNA-binding domain superfamily||Dishevelled-related protein||DEP domain||-||Dishevelled C-terminal||Dishevelled-2
ENSMUSG00000020889	1925.44	2949.97	-0.61552	2.4312e-06	4.6718e-05	Nr1d1	Nuclear hormone receptor||Zinc finger, NHR/GATA-type||Nuclear hormone receptor-like domain superfamily||Zinc finger, nuclear hormone receptor-type||Nuclear hormone receptor, ligand-binding domain
ENSMUSG00000020890	116.996	243.449	-1.0572	1.4521e-08	4.1213e-07	Gucy2e	Adenylyl cyclase class-3/4/guanylyl cyclase||Receptor, ligand binding region||Periplasmic binding protein-like I||Nucleotide cyclase||Haem NO binding associated||Serine-threonine/tyrosine-protein kinase, catalytic domain||Protein kinase-like domain superfamily||Protein kinase domain||Adenylyl cyclase class-4/guanylyl cyclase, conserved site
ENSMUSG00000020891	477.039	660.367	-0.46916	0.00011196	0.0015055	Alox8	Lipoxygenase, mammalian||Lipoxygenase||Lipoxygenase, C-terminal||PLAT/LH2 domain superfamily||PLAT/LH2 domain||Lipoxygenase, iron binding site||Lipoxigenase, C-terminal domain superfamily||Lipoxygenase, conserved site
ENSMUSG00000020893	4553.05	2803.94	0.69938	2.2646e-11	8.763e-10	Per1	-||PAS domain superfamily||PAS domain||PAS fold-3||Period circadian-like, C-terminal
ENSMUSG00000020898	1060.19	1491.23	-0.49218	1.0973e-06	2.264e-05	Ctc1	-||CST complex subunit CTC1
ENSMUSG00000020901	459.114	136.362	1.7514	2.9884e-27	3.6266e-25	Pik3r5	Phosphoinositide 3-kinase regulatory subunit 5/6
ENSMUSG00000020922	1415.81	1098.39	0.36624	0.00025043	0.0030733	Lsm12	Anticodon-binding domain
ENSMUSG00000020923	6363.83	4930.73	0.36809	4.3015e-06	7.9152e-05	Ubtf	High mobility group box domain||High mobility group box domain 5||High mobility group box domain superfamily
ENSMUSG00000020929	3450.55	2907.57	0.24701	0.0035416	0.029931	Eftud2	Elongation factor EFG, domain V-like||EF-G domain III/V-like||Transcription factor, GTP-binding domain||Ribosomal protein S5 domain 2-type fold, subgroup||Translation protein, beta-barrel domain superfamily||Translation elongation factor EFTu-like, domain 2||Ribosomal protein S5 domain 2-type fold||-||116kDa U5 small nuclear ribonucleoprotein component, N-terminal||Small GTP-binding protein domai…
ENSMUSG00000020930	93.8321	53.2715	0.81672	0.0044507	0.036215	Ccdc103	Dynein attachment factor, N-terminal||RNA-polymerase II-associated protein 3-like, C-terminal domain
ENSMUSG00000020932	173201	108926	0.66909	6.5082e-08	1.6494e-06	Gfap	Intermediate filament head, DNA-binding domain||Glial fibrillary acidic protein||Intermediate filament protein||Intermediate filament protein, conserved site
ENSMUSG00000020941	370.997	133.991	1.4693	2.9627e-18	2.1074e-16	Map3k14	Serine/threonine-protein kinase, active site||Protein kinase domain||Protein kinase, ATP binding site||Protein kinase-like domain superfamily||Mitogen-activated protein (MAP) kinase kinase kinase 14
ENSMUSG00000020946	4043.61	3431.06	0.23699	0.0065684	0.049741	Gosr2	GOSR2/Membrin/Bos1
ENSMUSG00000020962	2058.23	1637.96	0.3295	0.00041451	0.0047785	Gtf2a1	Transcription factor IIA, helical||Transcription factor IIA, alpha/beta subunit||Transcription factor IIA, beta-barrel
ENSMUSG00000020974	26.4311	5.31244	2.3148	0.00046108	0.0052299	Pole2	DNA polymerase epsilon, subunit B||DNA polymerase alpha/epsilon, subunit B||DNA polymerase epsilon subunit B, N-terminal
ENSMUSG00000021009	557.851	399.006	0.48347	0.00023914	0.0029583	Ptpn21	Protein-tyrosine phosphatase-like||Tyrosine specific protein phosphatases domain||FERM, N-terminal||Protein-tyrosine phosphatase, active site||FERM conserved site||PTP type protein phosphatase||PH-like domain superfamily||FERM central domain||-||FERM superfamily, second domain||FERM/acyl-CoA-binding protein superfamily||FERM, C-terminal PH-like domain||Ubiquitin-like domain superfamily||Protein-t…
ENSMUSG00000021010	717.877	1230.57	-0.77752	3.9345e-09	1.1926e-07	Npas3	PAS fold-3||PAS domain superfamily||PAS domain||Myc-type, basic helix-loop-helix (bHLH) domain||PAS fold||Helix-loop-helix DNA-binding domain superfamily
ENSMUSG00000021018	583.116	434.006	0.42607	0.0010572	0.010697	Polr2h	Nucleic acid-binding, OB-fold||RNA polymerase, Rpb8
ENSMUSG00000021025	2874.96	713.403	2.0108	6.6723e-62	3.0121e-59	Nfkbia	Ankyrin repeat-containing domain superfamily||Ankyrin repeat-containing domain||Ankyrin repeat
ENSMUSG00000021036	2576.85	2113.21	0.28618	0.0017786	0.016603	Sptlc2	Pyridoxal phosphate-dependent transferase||Aminotransferase, class-II, pyridoxal-phosphate binding site||Pyridoxal phosphate-dependent transferase, subdomain 2||Pyridoxal phosphate-dependent transferase, major region, subdomain 1||Aminotransferase, class I/classII
ENSMUSG00000021067	773.078	507.605	0.60691	2.0908e-07	4.9092e-06	Sav1	SARAH domain||Scaffold protein salvador||WW domain superfamily||WW domain
ENSMUSG00000021070	632.358	329.309	0.9413	2.7449e-08	7.429e-07	Bdkrb2	GPCR, rhodopsin-like, 7TM||Bradykinin receptor family||Bradykinin receptor B2||G protein-coupled receptor, rhodopsin-like
ENSMUSG00000021071	6840.47	5509.36	0.31221	0.0012397	0.012241	Trim9	Fibronectin type III superfamily||COS domain||Fibronectin type III||Concanavalin A-like lectin/glucanase domain superfamily||E3 ubiquitin-protein ligase TRIM9||Immunoglobulin-like fold||SPRY domain||B-box, C-terminal||Zinc finger, RING/FYVE/PHD-type||B30.2/SPRY domain||B-box-type zinc finger||Zinc finger, RING-type||Zinc finger, RING-type, conserved site
ENSMUSG00000021091	22340.1	2251.56	3.3106	2.4474e-248	1.6573e-244	Serpina3n	Serpin, conserved site||Serpin superfamily||Serpin family||Serpin domain
ENSMUSG00000021098	237.577	375.752	-0.66139	1.2386e-05	0.00020705	4930447C04Rik	Six6 opposite strand transcript 1||-
ENSMUSG00000021108	424.355	292.456	0.53705	0.00013212	0.0017392	Prkch	AGC-kinase, C-terminal||Novel protein kinase C eta, catalytic domain||Serine/threonine-protein kinase, active site||C2 domain superfamily||Protein kinase C, delta/epsilon/eta/theta types||Protein kinase C-like, phorbol ester/diacylglycerol-binding domain||Protein kinase, ATP binding site||-||Protein kinase domain||Diacylglycerol/phorbol-ester binding||Protein kinase-like domain superfamily||C2 do…
ENSMUSG00000021109	3845.95	2541.14	0.59786	2.1394e-12	9.2868e-11	Hif1a	Hypoxia-inducible factor-1 alpha||Helix-loop-helix DNA-binding domain superfamily||PAS fold||Hypoxia-inducible factor, alpha subunit||HIF-1 alpha, transactivation domain, C-terminal||Myc-type, basic helix-loop-helix (bHLH) domain||PAS fold-3||PAS domain||PAC motif||PAS domain superfamily
ENSMUSG00000021116	2333.04	1529.43	0.60922	4.0498e-11	1.5355e-09	Eif2s1	Translation initiation factor 2, alpha subunit, C-terminal||RNA-binding domain, S1||Translation initiation factor 2, alpha subunit||Translation initiation factor 2, alpha subunit, middle domain superfamily||Nucleic acid-binding, OB-fold||S1 domain
ENSMUSG00000021123	161.195	62.7336	1.3615	2.904e-06	5.5238e-05	Rdh12	NAD(P)-binding domain superfamily||Short-chain dehydrogenase/reductase SDR
ENSMUSG00000021127	2482.69	955.215	1.378	8.5977e-28	1.0742e-25	Zfp36l1	Tis11B-like protein, N-terminal||-||Zinc finger, CCCH-type superfamily||Zinc finger, CCCH-type
ENSMUSG00000021133	3414.3	1569.54	1.1213	1.1256e-35	2.0164e-33	Susd6	Sushi/SCR/CCP domain||Domain of unknown function DUF1725||Sushi/SCR/CCP superfamily
ENSMUSG00000021134	9864.8	12731.4	-0.36803	2.9429e-06	5.5946e-05	Srsf5	Serine/arginine-rich splicing factor SRSF4-like, RNA recognition motif 1||RNA recognition motif domain||-||RNA-binding domain superfamily
ENSMUSG00000021143	14917.2	19464.4	-0.38386	1.1975e-06	2.4617e-05	Pacs2	-||Phosphofurin acidic cluster sorting protein 1
ENSMUSG00000021149	2401.57	1480.93	0.69747	9.3368e-14	4.6489e-12	Gtpbp4	NOG, C-terminal||-||GTP binding domain||OBG-type guanine nucleotide-binding (G) domain||P-loop containing nucleoside triphosphate hydrolase||Nucleolar GTP-binding protein 1||Small GTP-binding protein domain||Nucleolar GTP-binding protein 1, Rossman-fold domain
ENSMUSG00000021171	2010.03	1362.01	0.56148	7.8295e-07	1.662e-05	Esyt2	-||C2 domain superfamily||C2 domain||Synaptotagmin-like mitochondrial-lipid-binding domain
ENSMUSG00000021180	1112.67	1414.58	-0.34634	0.00036826	0.0043229	Rps6ka5	Protein kinase-like domain superfamily||Protein kinase domain||AGC-kinase, C-terminal||Protein kinase, ATP binding site||Ribosomal protein S6 kinase II||Protein kinase, C-terminal||Serine/threonine-protein kinase, active site
ENSMUSG00000021182	1049	1607.9	-0.61616	4.9495e-10	1.6708e-08	Ccdc88c	Hook-like protein family||Protein Daple
ENSMUSG00000021185	562.56	730.502	-0.37688	0.0012283	0.012138	Dglucy	D-glutamate cyclase||-||D-glutamate cyclase, mitochondrial||Domain of unknown function DUF4392
ENSMUSG00000021186	742.359	474.137	0.64681	7.631e-08	1.9124e-06	Fbln5	EGF-like, conserved site||Complement Clr-like EGF domain||EGF-like domain||EGF-like calcium-binding domain||Fibulin-5||Fibulin 3/4/5||EGF-type aspartate/asparagine hydroxylation site||Growth factor receptor cysteine-rich domain superfamily||EGF-like calcium-binding, conserved site
ENSMUSG00000021188	3160.42	2440.76	0.37279	1.9061e-05	0.00030601	Trip11	GRIP domain||-
ENSMUSG00000021215	960.005	575.593	0.73799	8.0937e-11	2.9754e-09	Net1	Pleckstrin homology domain||Dbl homology (DH) domain||Dbl homology (DH) domain superfamily||Guanine-nucleotide dissociation stimulator, CDC24, conserved site||PH-like domain superfamily||-
ENSMUSG00000021223	190.2	272.803	-0.52034	0.0026129	0.023062	Papln	Immunoglobulin-like domain superfamily||Peptidase M12B, ADAM-TS||Immunoglobulin-like fold||Immunoglobulin V-set domain||Pancreatic trypsin inhibitor Kunitz domain||Immunoglobulin I-set||Pancreatic trypsin inhibitor Kunitz domain superfamily||PLAC||Proteinase inhibitor I2, Kunitz, conserved site||Thrombospondin type-1 (TSP1) repeat||Immunoglobulin||Immunoglobulin subtype 2||Immunoglobulin subtype|…
ENSMUSG00000021250	3420.1	306.271	3.4812	8.1957e-65	3.9083e-62	Fos	c-Fos/v-Fos||AP-1 transcription factor||Transcription factor, Skn-1-like, DNA-binding domain superfamily||Basic-leucine zipper domain
ENSMUSG00000021253	933.76	545.917	0.77437	1.274e-11	5.0567e-10	Tgfb3	Transforming growth factor-beta-related||TGF-beta, propeptide||Transforming growth factor-beta||Cystine-knot cytokine||Transforming growth factor-beta, C-terminal||Transforming growth factor beta, conserved site||Transforming growth factor beta-3
ENSMUSG00000021254	1852.54	1499.29	0.30523	0.0013747	0.013334	Gpatch2l	G patch domain-containing protein 2
ENSMUSG00000021258	1170.62	955.067	0.2936	0.003806	0.031764	Ccnk	Cyclin-like superfamily||WD40/YVTN repeat-like-containing domain superfamily||Cyclin, C-terminal domain||Cyclin-like||Cyclin, N-terminal
ENSMUSG00000021268	86.5146	153.169	-0.82411	0.00021365	0.0026743	-//-	-//-
ENSMUSG00000021273	7028.64	5748.04	0.29018	0.0004007	0.0046415	Fdft1	Squalene synthase-like||Squalene/phytoene synthase||Trans-Isoprenyl Diphosphate Synthases, head-to-head||Squalene/phytoene synthase, conserved site||Isoprenoid synthase domain superfamily||-
ENSMUSG00000021280	115.647	285.947	-1.306	9.6522e-13	4.3749e-11	Exoc3l4	Exocyst complex component EXOC3/Sec6||-
ENSMUSG00000021281	319.178	105.958	1.5909	0.0004465	0.0050919	Tnfaip2	Exocyst complex component EXOC3/Sec6||-
ENSMUSG00000021282	13793.7	10918.2	0.33728	1.8453e-05	0.00029681	Eif5	Translation initiation factor IF2/IF5, zinc-binding||Armadillo-type fold||Translation initiation factor IF2/IF5, N-terminal||W2 domain||Translation initiation factor IF2/IF5||-
ENSMUSG00000021285	3331.11	2716.95	0.29401	0.00062965	0.0068351	Ppp1r13b	Ankyrin repeat-containing domain||Ankyrin repeat||SH3 domain||SH3-like domain superfamily||Apoptosis-stimulating of p53 protein 1||Ubiquitin-like domain superfamily||Ankyrin repeat-containing domain superfamily
ENSMUSG00000021298	57.0508	1.84583	4.9499	6.0689e-05	0.00086378	Gpr132	GPCR, rhodopsin-like, 7TM||-||G protein-coupled receptor, rhodopsin-like||G2A lysophosphatidylcholine receptor
ENSMUSG00000021301	3641.51	4241.1	-0.2199	0.0064572	0.049051	Hecw1	WW domain superfamily||C2 domain superfamily||E3 ubiquitin-protein ligase HECW1/2, N-terminal||HECT, E3 ligase catalytic domain||HECT domain||C2 domain||-||WW domain
ENSMUSG00000021311	971.82	713.767	0.44524	0.0055363	0.043461	Mtr	Vitamin B12-dependent methionine synthase, activation domain||Homocysteine-binding domain||Cobalamin (vitamin B12)-binding module, cap domain||Cobalamin-binding domain superfamily||Homocysteine-binding domain superfamily||Cobalamin-dependent methionine synthase||-||Pterin-binding domain||Dihydropteroate synthase-like||Cobalamin (vitamin B12)-binding domain||Methionine synthase domain||Methionine …
ENSMUSG00000021314	6337.42	7439.89	-0.23139	0.0033116	0.028279	Amph	SH3 domain||Amphiphysin I, SH3 domain||BAR domain||AH/BAR domain superfamily||Amphiphysin||Amphiphysin, isoform 1||SH3-like domain superfamily
ENSMUSG00000021318	280.655	412.227	-0.55464	0.00017947	0.002287	Gli3	Transcription factor GLI3||Zinc finger C2H2 superfamily||Zinc finger, RING/FYVE/PHD-type||Zinc finger C2H2-type||-
ENSMUSG00000021326	1084.33	776.11	0.48248	6.503e-06	0.00011504	Trim27	Zinc finger, B-box, chordata||Butyrophylin-like, SPRY domain||SPRY-associated||SPRY domain||Concanavalin A-like lectin/glucanase domain superfamily||B30.2/SPRY domain||B-box-type zinc finger||Zinc finger, RING/FYVE/PHD-type||TRIM27, PRY/SPRY domain||-||Zinc finger, RING-type||Zinc finger, RING-type, conserved site
ENSMUSG00000021338	1275.94	1723.54	-0.43382	7.1456e-06	0.0001251	Carmil1	Leucine-rich repeat-containing protein 16A||Leucine-rich repeat||CARMIL, C-terminal domain||Leucine-rich repeat domain superfamily||-
ENSMUSG00000021360	1153.92	216.679	2.4129	1.0345e-54	3.6868e-52	Gcnt2	Glycosyl transferase, family 14||-
ENSMUSG00000021364	818.105	1018.31	-0.31582	0.0035396	0.029924	Elovl2	Elongation of very long chain fatty acids protein 2||ELO family||ELO family, conserved site
ENSMUSG00000021365	1523.16	901.596	0.75652	5.9725e-14	3.0318e-12	Nedd9	CAS family||Enhancer of filamentation 1, SH3 domain||SH3-like domain superfamily||CAS family, C-terminal||SH3 domain||Serine rich protein interaction
ENSMUSG00000021367	314.842	44.9116	2.8095	2.9253e-40	6.2293e-38	Edn1	Endothelin-like toxin||Endothelin-like toxin, conserved site||Endothelin
ENSMUSG00000021368	659.171	824.924	-0.32361	0.0048191	0.038867	Tbc1d7	Rab-GTPase-TBC domain superfamily||Rab-GTPase-TBC domain||-
ENSMUSG00000021371	1135.68	801.571	0.50265	1.7491e-06	3.4612e-05	Mcur1	Mitochondrial calcium uniporter regulator 1||Coiled-coil domain-containing protein 90-like
ENSMUSG00000021373	2206.86	2732.87	-0.30842	0.00032692	0.0038978	Cap2	Adenylate cyclase-associated CAP, C-terminal superfamily||CAP, conserved site, C-terminal||CARP motif||CAP, conserved site, N-terminal||Adenylate cyclase-associated CAP, N-terminal||C-CAP/cofactor C-like domain||Adenylate cyclase-associated CAP||Adenylate cyclase-associated CAP, N-terminal domain superfamily||-||Adenylate cyclase-associated CAP, C-terminal||Adenylyl cyclase-associated protein CAP2
ENSMUSG00000021374	2302.28	1674	0.45976	6.6787e-07	1.4366e-05	Nup153	Zinc finger, RanBP2-type superfamily||Nucleoporin Nup153, N-terminal||Retro-transposon transporting motif||Zinc finger, RanBP2-type||Nuclear pore complex protein
ENSMUSG00000021375	2650.54	3229.17	-0.28488	0.001045	0.010593	Kif13a	C2 domain superfamily||Kinesin-like KIF1-type||Kinesin motor domain||Kinesin-associated||Kinesin-like protein KIF13A||Forkhead-associated (FHA) domain||SMAD/FHA domain superfamily||P-loop containing nucleoside triphosphate hydrolase||Kinesin-like protein||Kinesin motor domain superfamily||Kinesin-like||Kinesin motor domain, conserved site||-
ENSMUSG00000021376	519.711	365.166	0.50916	0.0053707	0.042387	Tpmt	Thiopurine S-methyltransferase||TPMT family||S-adenosyl-L-methionine-dependent methyltransferase||-
ENSMUSG00000021377	1691.66	1386.83	0.28664	0.0061367	0.047106	Dek	SAP domain superfamily||DEK, C-terminal||-||SAP domain
ENSMUSG00000021379	5741.93	7206.08	-0.32768	0.0016877	0.015889	Id4	Myc-type, basic helix-loop-helix (bHLH) domain||DNA-binding protein inhibitor||Helix-loop-helix DNA-binding domain superfamily
ENSMUSG00000021385	923.207	707.396	0.38414	0.0016081	0.015264	Ippk	Inositol-pentakisphosphate 2-kinase||-
ENSMUSG00000021392	1079.69	712.044	0.60058	4.6481e-08	1.2134e-06	Nol8	Nucleolar protein 8, RNA recognition motif||RNA-binding domain superfamily||RNA recognition motif domain
ENSMUSG00000021408	476.739	170.096	1.4869	4.1275e-11	1.5632e-09	Ripk1	Serine/threonine-protein kinase, active site||RHIM domain||Death-like domain superfamily||Protein kinase domain||Death domain||Protein kinase-like domain superfamily||Serine-threonine/tyrosine-protein kinase, catalytic domain
ENSMUSG00000021411	788.899	387.944	1.024	9.8802e-07	2.0637e-05	Pxdc1	PX domain superfamily||-||Phox homologous domain
ENSMUSG00000021427	6584.98	5616.74	0.22944	0.0048396	0.039023	Ssr1	Translocon-associated protein (TRAP), alpha subunit
ENSMUSG00000021448	1766.18	2262.38	-0.35721	0.000199	0.002515	Shc3	SHC-transforming protein 3||SH2 adaptor protein C, SH2 domain||PH-like domain superfamily||SH2 domain superfamily||PTB/PI domain||Phosphotyrosine interaction domain, Shc-like||SH2 domain
ENSMUSG00000021453	5123.67	1013.7	2.3375	4.1472e-143	1.003e-139	Gadd45g	50S ribosomal protein L30e-like||Ribosomal protein L7Ae/L30e/S12e/Gadd45||Growth arrest and DNA damage-inducible protein GADD45
ENSMUSG00000021457	505.817	158.308	1.6759	2.1326e-11	8.2616e-10	Syk	SH2 domain superfamily||Tyrosine-protein kinase, active site||Tyrosine-protein kinase, non-receptor SYK/ZAP-70||SH2 domain||Tyrosine-protein kinase SYK/ZAP-70, inter-SH2 domain superfamily||Protein kinase domain||Tyrosine-protein kinase, catalytic domain||Protein kinase, ATP binding site||Serine-threonine/tyrosine-protein kinase, catalytic domain||Protein kinase-like domain superfamily||SYK/ZAP-7…
ENSMUSG00000021466	4519.59	5930.68	-0.392	1.4574e-06	2.9407e-05	Ptch1	Sterol-sensing domain||Transmembrane receptor, patched||-||Protein patched/dispatched
ENSMUSG00000021477	6563.44	3718.31	0.81981	1.7324e-12	7.6077e-11	Ctsl	Cysteine peptidase, asparagine active site||Peptidase C1A||Peptidase C1A, papain C-terminal||Cysteine peptidase, histidine active site||-||Cysteine peptidase, cysteine active site||Cathepsin propeptide inhibitor domain (I29)
ENSMUSG00000021483	600.885	462.96	0.3762	0.0024899	0.022214	Cdk20	Protein kinase-like domain superfamily||Protein kinase, ATP binding site||-||Protein kinase domain||Serine/threonine-protein kinase, active site
ENSMUSG00000021484	4075.07	3295.6	0.30628	0.00034522	0.004094	Lman2	Concanavalin A-like lectin/glucanase domain superfamily||VIP36, lectin domain||Legume-like lectin
ENSMUSG00000021493	2267.29	1904.03	0.25191	0.0065145	0.04938	Pdlim7	PDZ domain||PDZ superfamily||-||Zinc finger, LIM-type
ENSMUSG00000021495	2765.67	4344.67	-0.65162	1.0501e-06	2.1745e-05	Fam193b	FAM193 family||FAM193, C-terminal||Protein FAM193B
ENSMUSG00000021506	7.94621	28.6279	-1.8491	0.0019038	0.017617	Pitx1	Homeobox, conserved site||Homeobox-like domain superfamily||Homeobox domain||OAR domain||Homeobox protein Pitx/unc30
ENSMUSG00000021508	5305.9	4557.59	0.21933	0.0063404	0.048285	Cxcl14	Chemokine interleukin-8-like domain||Chemokine interleukin-8-like superfamily
ENSMUSG00000021550	872.257	680.956	0.35719	0.0016693	0.015756	2210016F16Rik	Queuosine salvage protein family
ENSMUSG00000021572	83.4928	188.566	-1.1753	9.6741e-08	2.3891e-06	Cep72	Leucine-rich repeat domain superfamily||-||Leucine-rich repeat, typical subtype||U2A'/phosphoprotein 32 family A, C-terminal||Leucine-rich repeat
ENSMUSG00000021573	9766.78	14706.6	-0.59051	4.2624e-14	2.1866e-12	Tppp	Tubulin polymerisation-promoting protein family member 1||EF-hand domain pair||P25-alpha
ENSMUSG00000021585	1887.69	1505.93	0.32596	0.00061614	0.0067014	Cast	Calpastatin||Proteinase inhibitor I27, calpastatin
ENSMUSG00000021587	1676.83	1149.16	0.54515	1.2818e-07	3.1089e-06	Pcsk1	Peptidase S8/S53 domain||Peptidase S8/S53 domain superfamily||Peptidase S8, subtilisin, Asp-active site||Peptidase S8, subtilisin, Ser-active site||Kexin/furin catalytic domain||Peptidase S8, subtilisin-related||Prohormone convertase enzyme||Peptidase S8, subtilisin, His-active site||Protease propeptides/proteinase inhibitor I9||Galactose-binding-like domain superfamily||P domain||Peptidase S8, p…
ENSMUSG00000021595	3696.51	2556.86	0.53179	9.7287e-10	3.1612e-08	Nsun2	RNA (C5-cytosine) methyltransferase||-||SAM-dependent methyltransferase RsmB/NOP2-type||tRNA (C5-cytosine) methyltransferase, NCL1||S-adenosyl-L-methionine-dependent methyltransferase
ENSMUSG00000021596	932.461	1159.91	-0.3149	0.0025861	0.022867	Mctp1	C2 domain||C2 domain superfamily||Phosphoribosyltransferase C-terminal
ENSMUSG00000021610	3660.36	2872.61	0.34963	5.2718e-05	0.00076312	Clptm1l	Cleft lip and palate transmembrane protein 1-like protein||Cleft lip and palate transmembrane 1
ENSMUSG00000021624	35.0098	77.1251	-1.1394	0.00055257	0.006112	Cd180	Leucine-rich repeat||Leucine-rich repeat domain superfamily||Cysteine-rich flanking region, C-terminal||-||Leucine-rich repeat, typical subtype
ENSMUSG00000021631	5.42322	23.0251	-2.086	0.0024216	0.021718	-//-	-//-
ENSMUSG00000021636	87.4075	34.108	1.3576	2.9031e-05	0.0004474	Marveld2	MARVEL domain-containing protein 2||Occludin homology domain||Marvel domain||ELL/occludin family
ENSMUSG00000021638	307.677	153.079	1.0071	4.1463e-09	1.2534e-07	Ocln	Occludin||Occludin homology domain||Marvel domain||ELL/occludin family
ENSMUSG00000021645	453.572	319.51	0.50547	0.00035319	0.004171	Smn1	Survival motor neuron||-||Tudor domain
ENSMUSG00000021646	730.031	925.435	-0.34217	0.0013023	0.012751	Mccc2	Acetyl-coenzyme A carboxyltransferase, N-terminal||-||Acetyl-coenzyme A carboxyltransferase, C-terminal||Acetyl-CoA carboxylase||ClpP/crotonase-like domain superfamily
ENSMUSG00000021647	751.319	562.596	0.41733	0.0038008	0.031727	Cartpt	CART, C-terminal domain superfamily||CART satiety factor
ENSMUSG00000021660	5357.8	4253.26	0.33307	7.2721e-05	0.0010183	Btf3	Nascent polypeptide-associated complex NAC domain
ENSMUSG00000021662	1570.4	2264.75	-0.52822	1.3128e-08	3.7384e-07	Arhgef28	Protein kinase C-like, phorbol ester/diacylglycerol-binding domain||Ankyrin repeat-containing domain superfamily||Pleckstrin homology domain||Dbl homology (DH) domain||Dbl homology (DH) domain superfamily||-||PH-like domain superfamily
ENSMUSG00000021675	985.948	477.49	1.046	1.8348e-19	1.4514e-17	F2rl2	GPCR, rhodopsin-like, 7TM||G protein-coupled receptor, rhodopsin-like||Protease-activated receptor 3||Protease-activated receptor
ENSMUSG00000021676	575.518	89.9288	2.678	8.8142e-51	2.713e-48	Iqgap2	Calponin homology domain||IQ motif, EF-hand binding site||Ras GTPase-activating protein, conserved site||Rho GTPase activation protein||Calponin-like domain superfamily||WW domain||Ras GTPase-activating protein||RasGAP protein, C-terminal
ENSMUSG00000021685	480.364	654.863	-0.44707	0.0002864	0.0034582	Otp	Helix-turn-helix motif||OAR domain||Homeobox domain||Homeobox-like domain superfamily||Homeobox, conserved site
ENSMUSG00000021696	1517.25	2089.5	-0.46171	9.5802e-07	2.0047e-05	Elovl7	ELO family, conserved site||-||Elongation of very long chain fatty acids protein 7||ELO family
ENSMUSG00000021697	36.555	103.02	-1.4948	8.5232e-06	0.00014738	Depdc1b	Rho GTPase-activating protein domain||-||Rho GTPase activation protein||Winged helix DNA-binding domain superfamily||Winged helix-like DNA-binding domain superfamily||DEP domain
ENSMUSG00000021701	1323.19	925.089	0.51635	4.7038e-07	1.0409e-05	Plk2	Protein kinase-like domain superfamily||First polo-box domain||Protein kinase, ATP binding site||Protein kinase domain||POLO box domain superfamily||Serine/threonine-protein kinase, active site||POLO box domain||Second polo-box domain
ENSMUSG00000021702	130.782	41.9825	1.6393	0.00033741	0.0040098	Thbs4	Thrombospondin/cartilage oligomeric matrix protein, coiled-coil domain||EGF-like, conserved site||Concanavalin A-like lectin/glucanase domain superfamily||EGF-like calcium-binding domain||EGF-like domain||Thrombospondin, type 3-like repeat||Thrombospondin, type 3 repeat||Thrombospondin||Thrombospondin, C-terminal||TSP type-3 repeat||EGF-like calcium-binding, conserved site||Laminin G domain
ENSMUSG00000021704	3449.69	4048.43	-0.2309	0.0049783	0.039904	Mtx3	Mitochondrial outer membrane transport complex protein, metaxin||-||Mitochondrial outer membrane transport complex Sam37/metaxin, N-terminal domain||Metaxin, glutathione S-transferase domain
ENSMUSG00000021709	9290.58	7115.06	0.38489	1.7578e-06	3.4743e-05	Erbin	Leucine-rich repeat, typical subtype||Leucine-rich repeat domain superfamily||PDZ domain||PDZ superfamily||Leucine-rich repeat||Erbin
ENSMUSG00000021710	1669.15	948.218	0.81582	2.2546e-16	1.4322e-14	Nln	Neurolysin/Thimet oligopeptidase, N-terminal||Peptidase M3A/M3B catalytic domain||-
ENSMUSG00000021711	2633.77	1969.6	0.41923	4.6919e-06	8.5776e-05	Trappc13	Protein of unknown function DUF974
ENSMUSG00000021731	418.687	317.41	0.39952	0.0061352	0.047106	Mrps30	Ribosomal protein L37/S30
ENSMUSG00000021750	11730.3	5237.39	1.1633	1.6448e-19	1.3073e-17	Fam107a	Protein of unknown function DUF1151
ENSMUSG00000021756	10878.6	5901.65	0.8823	4.3898e-28	5.5458e-26	Il6st	Long hematopoietin receptor, Gp130 family 2, conserved site||Immunoglobulin C2-set-like, ligand-binding||-||Fibronectin type III||Immunoglobulin-like fold||Immunoglobulin-like domain superfamily||Fibronectin type III superfamily||Type I cytokine receptor, cytokine-binding domain
ENSMUSG00000021770	2963.3	2184.32	0.44002	5.9533e-07	1.2938e-05	Samd8	Sterile alpha motif/pointed domain superfamily||Sphingomyelin synthase-like domain||-||Sterile alpha motif domain
ENSMUSG00000021775	4072.52	4796.23	-0.23598	0.0043578	0.03557	Nr1d2	Nuclear hormone receptor, ligand-binding domain||Zinc finger, nuclear hormone receptor-type||Nuclear hormone receptor-like domain superfamily||Zinc finger, NHR/GATA-type||Thyroid hormone receptor||Nuclear hormone receptor
ENSMUSG00000021782	3977.16	2607.23	0.60922	9.7348e-13	4.4064e-11	Dlg5	-||Guanylate kinase/L-type calcium channel beta subunit||SH3 domain||SH3-like domain superfamily||Domain of unknown function DUF622||CARD domain||PDZ superfamily||Guanylate kinase-like domain||P-loop containing nucleoside triphosphate hydrolase||PDZ domain||Death-like domain superfamily||Disks large homologue 5, SH3 domain
ENSMUSG00000021798	507.414	780.671	-0.62155	1.6142e-07	3.8489e-06	Ldb3	PDZ domain||PDZ superfamily||Domain of unknown function DUF4749||Zasp-like motif||Zinc finger, LIM-type
ENSMUSG00000021799	39.681	87.6225	-1.1429	0.00018878	0.0023948	Opn4	Visual pigments (opsins) retinal binding site||G protein-coupled receptor, rhodopsin-like||GPCR, rhodopsin-like, 7TM||Opsin
ENSMUSG00000021814	3728.01	2412.29	0.628	4.6736e-13	2.1978e-11	Anxa7	Annexin superfamily||Annexin repeat||Annexin A7||-||Annexin A7, chordates||Annexin||Annexin repeat, conserved site
ENSMUSG00000021820	18558.5	22276.3	-0.26343	0.00073125	0.0077931	Camk2g	NTF2-like domain superfamily||Calcium/calmodulin-dependent protein kinase II, association-domain||Serine/threonine-protein kinase, active site||Protein kinase-like domain superfamily||Protein kinase domain||Protein kinase, ATP binding site||-
ENSMUSG00000021822	267.347	81.7612	1.7092	2.8571e-08	7.6811e-07	Plau	Urokinase-type plasminogen activator||Kringle||EGF-like domain||Kringle-like fold||Peptidase S1, PA clan||EGF-like, conserved site||Serine proteases, trypsin family, serine active site||-||Peptidase S1A, chymotrypsin family||Kringle, conserved site||Serine proteases, trypsin domain
ENSMUSG00000021823	1329.82	854.151	0.63867	9.9485e-10	3.2264e-08	Vcl	Vinculin, conserved site||Vinculin||Alpha-catenin/vinculin-like superfamily||Vinculin/alpha-catenin
ENSMUSG00000021840	1300.49	816.245	0.67198	1.2467e-10	4.5048e-09	Mapk1ip1l	MAPK-interacting and spindle-stabilising protein
ENSMUSG00000021868	1065.28	856.925	0.31399	0.0034475	0.029269	Ppif	Cyclophilin-type peptidyl-prolyl cis-trans isomerase, conserved site||Cyclophilin-like domain superfamily||Cyclophilin-type peptidyl-prolyl cis-trans isomerase||Cyclophilin-type peptidyl-prolyl cis-trans isomerase domain
ENSMUSG00000021886	37.6472	3.74327	3.3302	6.9238e-08	1.7481e-06	Gpr65	G protein-coupled receptor, rhodopsin-like||Psychosine receptor||GPCR, rhodopsin-like, 7TM
ENSMUSG00000021890	2600.82	1570.43	0.72781	1.7898e-15	1.0503e-13	Eaf1	EAF family||Transcription elognation factor Eaf, N-terminal
ENSMUSG00000021891	673.283	501.969	0.42361	0.00063199	0.0068583	Mettl6	Methyltransferase type 12||S-adenosyl-L-methionine-dependent methyltransferase||Methyltransferase-like
ENSMUSG00000021892	5387.87	2965.36	0.86151	1.6712e-24	1.7683e-22	Sh3bp5	-||SH3-binding 5
ENSMUSG00000021903	1319.06	337.925	1.9647	2.5759e-19	2.0188e-17	Galnt15	Glycosyltransferase 2-like||Ricin B, lectin domain||Ricin B-like lectins||Nucleotide-diphospho-sugar transferases
ENSMUSG00000021904	826.086	199.497	2.0499	1.072e-35	1.9306e-33	Sema3g	Immunoglobulin-like domain||Semaphorin||Sema domain superfamily||PSI domain||WD40/YVTN repeat-like-containing domain superfamily||Immunoglobulin-like domain superfamily||Immunoglobulin||Sema domain||Immunoglobulin-like fold
ENSMUSG00000021922	86.8687	0.637531	7.0902	2.9601e-08	7.9415e-07	Itih4	Inter-alpha-trypsin inhibitor heavy chain, C-terminal||VIT domain||von Willebrand factor, type A||von Willebrand factor A-like domain superfamily
ENSMUSG00000021943	256.38	407.431	-0.66827	1.002e-05	0.0001704	Gdf10	Transforming growth factor beta, conserved site||Transforming growth factor-beta, C-terminal||Cystine-knot cytokine||Transforming growth factor-beta-related||Bone morphogenetic protein 3/3B
ENSMUSG00000021948	2202.65	1215.13	0.85813	1.6941e-15	1.001e-13	Prkcd	Diacylglycerol/phorbol-ester binding||Protein kinase-like domain superfamily||Protein kinase, ATP binding site||Protein kinase domain||Protein kinase, C-terminal||Protein kinase C, delta||AGC-kinase, C-terminal||Protein kinase C, delta/epsilon/eta/theta types||Protein kinase C-like, phorbol ester/diacylglycerol-binding domain||Serine/threonine-protein kinase, active site||C2 domain superfamily
ENSMUSG00000021950	95.2727	14.6093	2.7052	3.1484e-06	5.9552e-05	Anxa8	Annexin repeat||Annexin superfamily||Annexin||Annexin repeat, conserved site||Annexin A8
ENSMUSG00000021952	1009.01	813.093	0.31145	0.0051111	0.040775	Xpo4	CRM1 C-terminal domain||-||Armadillo-type fold||Armadillo-like helical
ENSMUSG00000021958	252.265	159.682	0.65974	0.00023872	0.0029542	Pinx1	G-patch domain
ENSMUSG00000021959	894.311	557.635	0.68146	2.2074e-09	6.8694e-08	Lats2	Ubiquitin-associated domain||AGC-kinase, C-terminal||UBA-like superfamily||Serine/threonine-protein kinase, active site||Protein kinase-like domain superfamily||-||Protein kinase, ATP binding site||Protein kinase domain
ENSMUSG00000021981	2502.43	1397.45	0.84053	3.3182e-09	1.0112e-07	Cab39l	Mo25-like||Armadillo-type fold||Armadillo-like helical
ENSMUSG00000021996	3565.41	2677.84	0.41299	2.44e-05	0.0003823	Esd	Alpha/Beta hydrolase fold||Putative esterase||S-formylglutathione hydrolase
ENSMUSG00000021998	2473.73	1738.86	0.50855	1.1836e-05	0.00019859	Lcp1	EF-hand domain||Actinin-type actin-binding domain, conserved site||EF-Hand 1, calcium-binding site||EF-hand domain pair||Calponin homology domain||Calponin-like domain superfamily
ENSMUSG00000022003	1228.13	834.709	0.55712	1.112e-07	2.7282e-06	Slc25a30	Mitochondrial substrate/solute carrier||Mitochondrial carrier protein||Mitochondrial carrier domain superfamily
ENSMUSG00000022009	558.173	389.96	0.51739	7.5254e-05	0.0010506	Nufip1	Zinc finger, double-stranded RNA binding||Zinc finger C2H2-type||Nuclear fragile X mental retardation-interacting protein 1, conserved domain
ENSMUSG00000022010	17295.1	14389	0.2654	0.00055918	0.006169	Tsc22d1	-||TSC-22 / Dip / Bun
ENSMUSG00000022012	1055.26	675.083	0.64447	3.338e-09	1.0163e-07	Enox1	RNA recognition motif domain||Ecto-NOX disulfide-thiol exchanger, RNA recognition motif||RNA-binding domain superfamily||-
ENSMUSG00000022015	58.4674	0	Inf	1.9607e-21	1.7516e-19	Tnfsf11	Tumour necrosis factor-like domain superfamily||Tumour necrosis factor domain||Tumour necrosis factor ligand 10/11
ENSMUSG00000022018	830.192	327.512	1.3419	2.2811e-08	6.2587e-07	Rgcc	Regulator of cell cycle RGCC
ENSMUSG00000022034	3.10574	16.6271	-2.4205	0.0057284	0.044535	Esco2	N-acetyltransferase ESCO, acetyl-transferase domain||-||N-acetyltransferase ESCO, zinc-finger
ENSMUSG00000022044	5260.17	8590.69	-0.70766	8.8327e-10	2.8895e-08	Stmn4	Stathmin-4||Stathmin, conserved site||Stathmin superfamily||Stathmin family
ENSMUSG00000022052	3223.33	2268.63	0.50673	6.0775e-09	1.8003e-07	Ppp2r2a	WD40 repeat||Protein phosphatase 2A regulatory subunit PR55, conserved site||WD40-repeat-containing domain superfamily||-||WD40/YVTN repeat-like-containing domain superfamily||Protein phosphatase 2A regulatory subunit PR55
ENSMUSG00000022066	55.8506	111.954	-1.0033	0.00014417	0.0018854	Entpd4b	Nucleoside phosphatase GDA1/CD39
ENSMUSG00000022074	73.5416	25.8722	1.5072	1.109e-05	0.00018745	Tnfrsf10b	TNFR/NGFR cysteine-rich region||Tumour necrosis factor receptor 10A/B, death domain||Death domain||Tumor necrosis factor receptor 10, N-terminal||Tumour necrosis factor receptor 10||Death-like domain superfamily
ENSMUSG00000022089	614.463	410.451	0.58212	4.6418e-06	8.4952e-05	Bin3	-||Bridging integrator 3, BAR domain||AH/BAR domain superfamily||BAR domain
ENSMUSG00000022092	641.527	470.324	0.44786	0.00025863	0.0031612	Ppp3cc	Metallo-dependent phosphatase-like||Calcineurin-like phosphoesterase domain, ApaH type||Serine/threonine-specific protein phosphatase/bis(5-nucleosyl)-tetraphosphatase
ENSMUSG00000022094	6229.56	1541.68	2.0146	8.1907e-103	9.244e-100	Slc39a14	-||Zinc/iron permease
ENSMUSG00000022098	2620.45	1839.24	0.51071	9.6024e-05	0.0013141	Bmp1	Bone morphogenetic protein 1/tolloid-like protein||-||Peptidase, metallopeptidase||EGF-like calcium-binding, conserved site||CUB domain||Spermadhesin, CUB domain superfamily||EGF-type aspartate/asparagine hydroxylation site||Metallopeptidase, catalytic domain superfamily||Tolloid/BMP1 peptidase domain||Peptidase M12A||EGF-like, conserved site||EGF-like calcium-binding domain||EGF-like domain
ENSMUSG00000022099	10562.9	12616.6	-0.25632	0.0011658	0.011623	Dmtn	-||Villin headpiece||Villin headpiece domain superfamily||Putative adherens-junction anchoring domain
ENSMUSG00000022102	103.065	34.2086	1.5911	7.2178e-08	1.8197e-06	Dok2	Pleckstrin homology domain||PH-like domain superfamily||IRS-type PTB domain
ENSMUSG00000022105	1109.04	884.472	0.32643	0.0023548	0.021243	Rb1	Retinoblastoma-associated protein, N-terminal||Cyclin-like superfamily||-||Retinoblastoma-associated protein, A-box||Cyclin-like||Retinoblastoma protein family||Retinoblastoma-associated protein, C-terminal||Retinoblastoma-associated protein||Retinoblastoma-associated protein, B-box
ENSMUSG00000022114	1960.5	965.498	1.0219	1.487e-21	1.3355e-19	Spry2	Protein sprouty homologue 2||Sprouty
ENSMUSG00000022123	79.7379	130.333	-0.70886	0.0034053	0.028962	Scel	Zinc finger, LIM-type
ENSMUSG00000022125	1096.51	879.649	0.31792	0.002583	0.022846	Cln5	Ceroid-lipofuscinosis neuronal protein 5||-
ENSMUSG00000022126	198.446	3.17629	5.9653	1.2698e-22	1.2179e-20	Acod1	MmgE/PrpD||MmgE/PrpD superfamily
ENSMUSG00000022136	4331.79	3547.33	0.28823	0.00076168	0.008059	Dnajc3	DnaJ domain||Tetratricopeptide-like helical domain superfamily||Tetratricopeptide repeat-containing domain||DnaJ domain superfamily||Tetratricopeptide repeat-like domain||Tetratricopeptide repeat
ENSMUSG00000022141	2218.77	1781.5	0.31667	0.00041865	0.0048187	Nipbl	Sister chromatid cohesion C-terminal domain||SCC2/Nipped-B family||Armadillo-type fold||Armadillo-like helical||HEAT repeat associated with sister chromatid cohesion protein
ENSMUSG00000022144	212.353	3.32028	5.999	6.4094e-22	5.8651e-20	Gdnf	Transforming growth factor-beta, C-terminal||Cystine-knot cytokine||Glial cell line-derived neurotrophic factor
ENSMUSG00000022146	2455.86	127.272	4.2702	5.1499e-81	3.229e-78	Osmr	Immunoglobulin-like fold||Long hematopoietin receptor, Gp130 family 2, conserved site||Fibronectin type III||Fibronectin type III superfamily
ENSMUSG00000022148	302.405	111.71	1.4367	4.473e-15	2.5233e-13	Fyb	SH3 domain||FYN-binding protein||Helically-extended SH3 domain||FYB, helically extended SH3 domain||SH3-like domain superfamily
ENSMUSG00000022150	1727.23	432.011	1.9993	4.2347e-21	3.6953e-19	Dab2	PH-like domain superfamily||-||PTB/PI domain
ENSMUSG00000022178	210.344	109.392	0.94325	2.8595e-06	5.4576e-05	Ajuba	Zinc finger, LIM-type
ENSMUSG00000022180	1042.25	700.757	0.57272	1.1887e-07	2.9039e-06	Slc7a8	L-type amino acid transporter||Amino acid/polyamine transporter I
ENSMUSG00000022184	326.903	235.446	0.47347	0.0023173	0.020945	Fbxo4	F-box-like domain superfamily||F-box domain
ENSMUSG00000022195	1298.91	1074.02	0.27429	0.0061715	0.047296	6030458C11Rik	Uncharacterised protein family UPF0489
ENSMUSG00000022199	38260.8	50017.8	-0.38657	6.921e-05	0.00097274	Slc22a17	Major facilitator, sugar transporter-like||Major facilitator superfamily domain||Sugar transporter, conserved site||-||MFS transporter superfamily
ENSMUSG00000022200	2801.46	2194.43	0.35234	0.00011042	0.0014883	Golph3	Golgi phosphoprotein 3-like
ENSMUSG00000022203	706.71	1422.65	-1.0094	1.6018e-12	7.0526e-11	Efs	SH3 domain||CAS family, C-terminal||Embryonal Fyn-associated substrate, SH3 domain||-||CAS family||SH3-like domain superfamily
ENSMUSG00000022204	952.295	759.979	0.32545	0.0059403	0.045919	Ngdn	Sas10/Utp3/C1D
ENSMUSG00000022205	3857.25	3228.56	0.25668	0.0029432	0.025519	Sub1	ssDNA-binding transcriptional regulator||Transcriptional coactivator p15 (PC4)
ENSMUSG00000022208	6790.64	10911.6	-0.68424	1.5441e-17	1.0519e-15	Jph4	MORN motif||Junctophilin
ENSMUSG00000022211	1746.43	2948.61	-0.75562	5.2907e-17	3.4783e-15	Carmil3	Leucine-rich repeat||CARMIL, C-terminal domain||Leucine-rich repeat domain superfamily||Capping protein, Arp2/3 and myosin-I linker protein 3||-
ENSMUSG00000022212	4188.41	5158.04	-0.30042	0.00022537	0.0028002	Cpne6	von Willebrand factor A-like domain superfamily||-||von Willebrand factor, type A||C2 domain superfamily||Copine||C2 domain
ENSMUSG00000022216	1175.84	899.725	0.38614	0.00021633	0.0027028	Psme1	Proteasome activator PA28||-||Proteasome activator PA28, C-terminal domain||Proteasome activator PA28, N-terminal domain||Proteasome activator PA28, C-terminal domain superfamily||Proteasome activator PA28, N-terminal domain superfamily||Proteasome activator superfamily
ENSMUSG00000022218	1384.62	4.90085	8.1422	5.9665e-82	3.8849e-79	Tgm1	Immunoglobulin E-set||Transglutaminase-like||Transglutaminase, active site||Protein-glutamine gamma-glutamyltransferase, animal||-||Transglutaminase-like superfamily||Transglutaminase, C-terminal||Immunoglobulin-like fold||Transglutaminase, C-terminal domain superfamily||Transglutaminase, N-terminal
ENSMUSG00000022220	420.841	77.3122	2.4445	1.2314e-28	1.635e-26	Adcy4	Adenylate cyclase, N-terminal||Nucleotide cyclase||Adenylate cyclase, conserved domain||Adenylyl cyclase class-4/guanylyl cyclase, conserved site||Adenylate cyclase||-||Adenylyl cyclase class-3/4/guanylyl cyclase
ENSMUSG00000022221	62.7386	10.9456	2.519	5.8032e-09	1.7235e-07	Ripk3	Serine/threonine-protein kinase, active site||RHIM domain||Protein kinase, ATP binding site||Protein kinase domain||Protein kinase-like domain superfamily
ENSMUSG00000022223	1893.62	2398.4	-0.34093	0.00016554	0.0021359	Sdr39u1	NAD-dependent epimerase/dehydratase||Epimerase family protein SDR39U1||-||Domain of unknown function DUF1731||NAD(P)-binding domain superfamily
ENSMUSG00000022234	6792.48	5432.94	0.32221	9.2126e-05	0.0012654	Cct5	Chaperone tailless complex polypeptide 1 (TCP-1)||Chaperonin Cpn60/TCP-1 family||T-complex protein 1, epsilon subunit||GroEL-like apical domain superfamily||GroEL-like equatorial domain superfamily||Chaperonin Cpn60/TCP-1 domain superfamily||Chaperonin TCP-1, conserved site
ENSMUSG00000022235	516.484	676.197	-0.38872	0.0046211	0.037413	Cmbl	Dienelactone hydrolase||Alpha/Beta hydrolase fold
ENSMUSG00000022237	454.251	60.9072	2.8988	9.0265e-57	3.4339e-54	Ankrd33b	Ankyrin repeat-containing domain||Ankyrin repeat||-||Ankyrin repeat-containing domain superfamily
ENSMUSG00000022241	2198.95	1494.76	0.5569	2.23e-09	6.9332e-08	Tars	Threonine-tRNA ligase, class IIa||Aminoacyl-tRNA synthetase, class II||-||Threonyl/alanyl tRNA synthetase, class II-like, putative editing domain superfamily||Anticodon-binding||TGS-like||Threonyl/alanyl tRNA synthetase, SAD||Anticodon-binding domain superfamily||Aminoacyl-tRNA synthetase, class II (G/ P/ S/T)||Beta-grasp domain superfamily||TGS||Threonine-tRNA ligase catalytic core domain
ENSMUSG00000022246	868.032	222.158	1.9662	2.1385e-18	1.5406e-16	Rai14	Ankyrin repeat-containing domain superfamily||Ankyrin repeat-containing domain||Ankyrin repeat
ENSMUSG00000022247	1342.27	774.43	0.79347	4.6509e-09	1.3985e-07	Brix1	Ribosome biogenesis protein BRX1||Brix domain||Anticodon-binding domain superfamily||-
ENSMUSG00000022255	4036.94	3441.56	0.2302	0.005881	0.045501	Mtdh	-||Protein LYRIC
ENSMUSG00000022261	2580.03	3198.2	-0.30987	0.0039966	0.033109	Sdc2	Syndecan||Neurexin/syndecan/glycophorin C||Syndecan-2||Syndecan, conserved site||Syndecan/Neurexin domain||Cytochrome c1, transmembrane anchor, C-terminal
ENSMUSG00000022262	71.5079	127.503	-0.83435	0.0013748	0.013334	Dnah5	ATPase, dynein-related, AAA domain||AAA+ ATPase domain||Dynein heavy chain, coiled coil stalk||Dynein heavy chain domain||Dynein heavy chain, domain-1||Dynein heavy chain, AAA module D4||Dynein heavy chain, ATP-binding dynein motor region D5||P-loop containing nucleoside triphosphate hydrolase||Dynein heavy chain, hydrolytic ATP-binding dynein motor region D1||Dynein heavy chain, domain-2||Dynein…
ENSMUSG00000022265	9426.97	12238.3	-0.37654	1.9096e-06	3.7438e-05	Ank	Progressive ankylosis
ENSMUSG00000022270	1917.74	2313.51	-0.27067	0.0025902	0.022892	Fam134b	Reticulophagy receptor 1
ENSMUSG00000022272	1691.03	2108.04	-0.318	0.00061448	0.0066962	Myo10	PH-like domain superfamily||P-loop containing nucleoside triphosphate hydrolase||Unconventional myosin-X, coiled coil domain||FERM central domain||Class X myosin, motor domain||Band 4.1 domain||MyTH4 domain||IQ motif, EF-hand binding site||FERM domain||Pleckstrin homology domain||FERM/acyl-CoA-binding protein superfamily||Ras-associating (RA) domain||FERM superfamily, second domain||Myosin head, …
ENSMUSG00000022280	1514.24	1123.87	0.43012	1.4191e-05	0.00023381	Rnf19a	E3 ubiquitin ligase RBR family||Zinc finger, RING/FYVE/PHD-type||Zinc finger, RING-type||IBR domain
ENSMUSG00000022283	6746.13	3576.04	0.9157	2.1651e-28	2.798e-26	Pabpc1	RNA recognition motif domain, eukaryote||RNA recognition motif domain||Polyadenylate binding protein, human types 1, 2, 3, 4||Polyadenylate-binding protein/Hyperplastic disc protein||PABC (PABP) domain||RNA-binding domain superfamily
ENSMUSG00000022285	20994.2	17552.1	0.25834	0.00096876	0.0099005	Ywhaz	14-3-3 domain||14-3-3 protein, conserved site||14-3-3 protein||14-3-3 domain superfamily
ENSMUSG00000022300	454.3	290.378	0.64571	1.6858e-05	0.00027297	Dcaf13	WD40/YVTN repeat-like-containing domain superfamily||WD40-repeat-containing domain||Sof1-like protein||WD40-repeat-containing domain superfamily||WD40 repeat||WD40 repeat, conserved site
ENSMUSG00000022311	978.167	1492.87	-0.60994	7.7638e-10	2.5645e-08	Csmd3	CUB domain||Sushi/SCR/CCP domain||Spermadhesin, CUB domain superfamily||Sushi/SCR/CCP superfamily
ENSMUSG00000022321	1114.33	1562.97	-0.48811	7.1866e-07	1.5371e-05	Cdh10	Cadherin conserved site||Cadherin, cytoplasmic domain||Catenin binding domain superfamily||Cadherin||Cadherin-like||-
ENSMUSG00000022324	926.243	587.7	0.65631	6.0946e-07	1.3211e-05	Matn2	von Willebrand factor, type A||Growth factor receptor cysteine-rich domain superfamily||von Willebrand factor A-like domain superfamily||EGF-type aspartate/asparagine hydroxylation site||Matrilin-2||Matrilin, coiled-coil domain superfamily||Six-bladed beta-propeller, TolB-like||EGF-like calcium-binding domain||EGF-like domain||Matrilin, coiled-coil trimerisation domain||EGF-like, conserved site
ENSMUSG00000022325	354.557	178.274	0.99192	8.3556e-10	2.744e-08	Pop1	POPLD||Ribonuclease P/MRP, subunit POP1
ENSMUSG00000022329	646.118	466.291	0.47057	0.00027691	0.0033617	Stk3	Protein kinase-like domain superfamily||-||Protein kinase, ATP binding site||Protein kinase domain||Mst1 SARAH domain||SARAH domain
ENSMUSG00000022336	2959.23	2306.03	0.35981	6.731e-05	0.00094957	Eif3e	Tetratricopeptide-like helical domain superfamily||Eukaryotic translation initiation factor 3 subunit E, N-terminal||Eukaryotic translation initiation factor 3 subunit E||Winged helix-like DNA-binding domain superfamily||Proteasome component (PCI) domain||Winged helix DNA-binding domain superfamily
ENSMUSG00000022346	1248.54	178.471	2.8065	1.5437e-94	1.4519e-91	Myc	Transcription regulator Myc, N-terminal||Helix-loop-helix DNA-binding domain superfamily||Transcription regulator Myc||Myc-type, basic helix-loop-helix (bHLH) domain||Leucine zipper, Myc
ENSMUSG00000022351	6752.64	5579.79	0.27524	0.00081739	0.0085628	Sqle	FAD/NAD(P)-binding domain superfamily||Squalene epoxidase||FAD-binding domain
ENSMUSG00000022367	119.987	8.79948	3.7693	1.0125e-24	1.0849e-22	Has2	Nucleotide-diphospho-sugar transferases||Hyaluronan synthase 2||Glycosyltransferase 2-like
ENSMUSG00000022372	462.996	63.507	2.866	8.224e-28	1.0313e-25	Sla	SH2 domain superfamily||SH3 domain||SLAP, SH2 domain||Src-like-adapter||Src-like-adapter, SH3 domain||SH2 domain||SH3-like domain superfamily
ENSMUSG00000022376	1470.88	1895.42	-0.36584	0.00010441	0.0014169	Adcy8	Adenylyl cyclase class-3/4/guanylyl cyclase||Adenylate cyclase||Adenylyl cyclase class-4/guanylyl cyclase, conserved site||Adenylate cyclase, N-terminal||Adenylate cyclase, conserved domain||Nucleotide cyclase
ENSMUSG00000022414	1263.02	1598.3	-0.33966	0.0005658	0.0062319	Tab1	PPM-type phosphatase domain superfamily||-||PPM-type phosphatase domain||Protein phosphatase 2C family
ENSMUSG00000022425	15166.3	22331.2	-0.55819	1.4451e-05	0.00023764	Enpp2	-||Somatomedin B domain||Somatomedin B, chordata||Somatomedin B-like domain superfamily||Alkaline phosphatase-like, alpha/beta/alpha||Extracellular Endonuclease, subunit A||Alkaline-phosphatase-like, core domain superfamily||Ectonucleotide pyrophosphatase/phosphodiesterase family member 2||DNA/RNA non-specific endonuclease||Type I phosphodiesterase/nucleotide pyrophosphatase/phosphate transferase
ENSMUSG00000022426	2348.43	1968.55	0.25457	0.0042787	0.035059	Josd1	Josephin domain
ENSMUSG00000022428	1430.19	1860.33	-0.37935	7.8824e-05	0.0010965	Cby1	Chibby family
ENSMUSG00000022438	1459.41	974.635	0.58245	0.0002393	0.0029592	Parvb	Calponin-like domain superfamily||Calponin homology domain||Parvin||-
ENSMUSG00000022443	7468.45	3372.83	1.1468	1.7108e-43	4.0507e-41	Myh9	Myosin, N-terminal, SH3-like||-||P-loop containing nucleoside triphosphate hydrolase||Myosin tail||Myosin S1 fragment, N-terminal||Myosin head, motor domain||IQ motif, EF-hand binding site
ENSMUSG00000022449	567.646	892.377	-0.65266	8.0234e-09	2.3358e-07	Adamts20	Peptidase M12B, ADAM/reprolysin||Thrombospondin type-1 (TSP1) repeat superfamily||Peptidase M12B, ADAM-TS||Peptidase M12B, GON-ADAMTSs||Metallopeptidase, catalytic domain superfamily||Thrombospondin type-1 (TSP1) repeat||ADAM-TS Spacer 1||Peptidase M12B, propeptide
ENSMUSG00000022451	2864.23	1771.14	0.69347	1.9225e-14	1.0202e-12	Twf1	Actin-depolymerising factor homology domain||Twinfilin||ADF-H/Gelsolin-like domain superfamily
ENSMUSG00000022462	10985.7	6951.62	0.66021	1.3661e-16	8.7768e-15	Slc38a2	Amino acid transporter, transmembrane domain
ENSMUSG00000022468	387.6	78.2638	2.3082	5.488e-26	6.2987e-24	Endou	Endoribonuclease EndoU-like||EndoU ribonuclease family||-||Somatomedin B domain||Somatomedin B-like domain superfamily||Somatomedin B, chordata
ENSMUSG00000022469	3585.89	2295.37	0.64361	7.4298e-14	3.7379e-12	Rapgef3	Ubiquitin-like domain superfamily||Winged helix-like DNA-binding domain superfamily||DEP domain||Ras guanine-nucleotide exchange factors catalytic domain||Ras-like guanine nucleotide exchange factor, N-terminal||Cyclic nucleotide-binding-like||RmlC-like jelly roll fold||Winged helix DNA-binding domain superfamily||Cyclic nucleotide-binding domain||-||Ras guanine-nucleotide exchange factor, conser…
ENSMUSG00000022483	484.211	210.442	1.2022	2.1501e-05	0.00034033	Col2a1	Collagen triple helix repeat||Fibrinogen, alpha/beta/gamma chain, C-terminal globular, subdomain 1||Fibrillar collagen, C-terminal||VWFC domain||Insect cysteine-rich antifreeze protein
ENSMUSG00000022488	791.231	434.398	0.86508	2.822e-08	7.5952e-07	Nckap1l	Nck-associated protein 1||-
ENSMUSG00000022490	736.626	949.776	-0.36666	0.001039	0.010546	Ppp1r1a	Protein phosphatase inhibitor 1
ENSMUSG00000022494	1044.45	1325.44	-0.34373	0.00075701	0.0080207	Shisa9	Shisa family
ENSMUSG00000022500	3714.8	2672.99	0.47483	2.5986e-08	7.0727e-07	Litaf	LITAF domain containing protein||LPS-induced tumour necrosis factor alpha factor
ENSMUSG00000022508	1660.62	1060.1	0.64752	6.9669e-11	2.5836e-09	Bcl6	BTB/POZ domain||Zinc finger C2H2 superfamily||SKP1/BTB/POZ domain superfamily||Zinc finger C2H2-type
ENSMUSG00000022514	3844.68	2519.21	0.60989	1.6765e-12	7.3718e-11	Il1rap	Interleukin-1 receptor type I/II||Interleukin-1 receptor family||Immunoglobulin-like domain superfamily||Immunoglobulin-like fold||Immunoglobulin subtype||Toll/interleukin-1 receptor homology (TIR) domain||-||Immunoglobulin-like domain||Toll/interleukin-1 receptor homology (TIR) domain superfamily
ENSMUSG00000022517	8941.13	10504	-0.2324	0.0037146	0.031131	Mgrn1	Zinc finger, RING-type
ENSMUSG00000022533	2800.54	2144.07	0.38535	1.5811e-05	0.00025786	Atp13a3	HAD-like superfamily||P-type ATPase||P-type ATPase, subfamily V||P-type ATPase, A domain superfamily||P-type ATPase, phosphorylation site||P-type ATPase, cytoplasmic domain N||Cation-transporting P-type ATPase, N-terminal||HAD superfamily||P-type ATPase, transmembrane domain superfamily
ENSMUSG00000022534	70.0164	0.637531	6.7791	8.14e-17	5.3001e-15	Mefv	B-box-type zinc finger||Pyrin||DAPIN domain||Death-like domain superfamily
ENSMUSG00000022537	1842.18	2354.4	-0.35394	0.00055676	0.006149	Tmem44	-
ENSMUSG00000022538	1160.99	827.039	0.48932	3.2956e-06	6.2198e-05	Lsg1	P-loop containing nucleoside triphosphate hydrolase||Circularly permuted (CP)-type guanine nucleotide-binding (G) domain||-||GTP-binding protein, orthogonal bundle domain superfamily||GTP binding domain
ENSMUSG00000022543	181.642	264.099	-0.53998	0.0013988	0.013532	-//-	-//-
ENSMUSG00000022546	742.871	1116.44	-0.58772	5.124e-08	1.3203e-06	Gpt	Pyridoxal phosphate-dependent transferase, subdomain 2||Pyridoxal phosphate-dependent transferase||Pyridoxal phosphate-dependent transferase, major region, subdomain 1||-||Aminotransferase, class I/classII
ENSMUSG00000022548	32759.7	21603.1	0.60068	6.2472e-06	0.00011109	Apod	Lipocalin family conserved site||Lipocalin, ApoD type||Apolipoprotein D, vertebrates||Lipocalin||Calycin||Apolipoprotein D||Lipocalin/cytosolic fatty-acid binding domain
ENSMUSG00000022550	391.018	581.036	-0.57139	9.8727e-06	0.00016823	Adck5	UbiB domain||-||Protein kinase-like domain superfamily
ENSMUSG00000022554	553.263	361.976	0.61207	3.7092e-06	6.9423e-05	Hgh1	Protein HGH1 C-terminal||Armadillo-like helical||Armadillo-type fold||Protein HGH1 N-terminal
ENSMUSG00000022557	2676.93	2082.97	0.36194	5.0239e-05	0.00073129	Bop1	WD40-repeat-containing domain superfamily||WD repeat BOP1/Erb1||WD40 repeat||WD40 repeat, conserved site||BOP1, N-terminal domain||WD40-repeat-containing domain||WD40/YVTN repeat-like-containing domain superfamily
ENSMUSG00000022558	5450.79	6966.75	-0.35402	0.00048891	0.0054904	Mroh1	HEAT, type 2||Armadillo-like helical||Armadillo-type fold||-
ENSMUSG00000022580	354.972	529.248	-0.57624	1.5956e-05	0.00025986	Rhpn1	PDZ domain||BRO1 domain||PDZ superfamily||-||HR1 repeat superfamily||HR1 rho-binding domain
ENSMUSG00000022582	22.0105	1.97701	3.4768	0.000219	0.0027332	Ly6g	Ly-6 antigen/uPA receptor-like||CD59 antigen, conserved site
ENSMUSG00000022584	101.979	14.0575	2.8589	0.00045248	0.0051513	Ly6c2	CD59 antigen, conserved site||Ly-6 antigen/uPA receptor-like
ENSMUSG00000022602	1590.9	1319.31	0.27005	0.0043233	0.03534	Arc	Activity-regulated cytoskeleton-associated protein
ENSMUSG00000022604	934.284	1360.87	-0.54259	1.3642e-07	3.296e-06	Cep97	IQ motif, EF-hand binding site||Leucine rich repeat 4||Leucine-rich repeat||Leucine-rich repeat domain superfamily
ENSMUSG00000022610	842.099	1097.75	-0.38249	0.00027438	0.0033333	Mapk12	Mitogen-activated protein (MAP) kinase, conserved site||Mitogen-activated protein (MAP) kinase, p38||Protein kinase-like domain superfamily||Protein kinase domain||Protein kinase, ATP binding site
ENSMUSG00000022615	94.1369	145.73	-0.63047	0.0055622	0.043604	Tymp	Glycosyl transferase, family 3||Glycosyl transferase family 3, N-terminal domain superfamily||Glycosyl transferase family 3, N-terminal domain||Pyrimidine nucleoside phosphorylase-like, C-terminal domain superfamily||Nucleoside phosphorylase/phosphoribosyltransferase catalytic domain superfamily||Pyrimidine-nucleoside phosphorylase, bacterial/eukaryotic||Thymidine/pyrimidine-nucleoside phosphoryl…
ENSMUSG00000022620	1250.53	1547.95	-0.30782	0.0023786	0.021405	Arsa	Sulfatase, conserved site||Alkaline phosphatase-like, alpha/beta/alpha||Sulfatase, N-terminal||Alkaline-phosphatase-like, core domain superfamily
ENSMUSG00000022623	4973.44	3979.97	0.32149	0.00010526	0.0014267	Shank3	PDZ domain||Ankyrin repeat-containing domain superfamily||Sterile alpha motif domain||Ankyrin repeat||SH3-like domain superfamily||PDZ superfamily||Sterile alpha motif/pointed domain superfamily||-||SH3 domain||Talin, N-terminal F0 domain||Ankyrin repeat-containing domain
ENSMUSG00000022637	873.065	649.458	0.42685	0.00020449	0.0025748	Cblb	Adaptor protein Cbl, N-terminal helical||Adaptor protein Cbl, SH2-like domain||Adaptor protein Cbl, N-terminal domain superfamily||EF-hand domain pair||SH2 domain superfamily||Ubiquitin-associated domain||Adaptor protein Cbl, PTB domain||Zinc finger, RING-type, conserved site||Adaptor protein Cbl||Zinc finger, RING-type||Zinc finger, RING/FYVE/PHD-type||Adaptor protein Cbl, EF hand-like
ENSMUSG00000022641	1854.03	1446.31	0.3583	0.00017128	0.002197	Bbx	High mobility group box domain superfamily||High mobility group box domain||HMG box transcription factor BBX, domain of unknown function DUF2028
ENSMUSG00000022651	343.892	25.9627	3.7274	3.3864e-23	3.3525e-21	Retnlg	Resistin||Resistin-like superfamily
ENSMUSG00000022661	3529.03	2539.32	0.47483	5.5276e-08	1.4178e-06	Cd200	Immunoglobulin||Immunoglobulin-like domain superfamily||OX-2 membrane glycoprotein||Immunoglobulin-like fold||Immunoglobulin V-set domain||Immunoglobulin subtype||-||Immunoglobulin-like domain
ENSMUSG00000022667	28.598	6.05754	2.2391	0.00021236	0.002661	Cd200r1	Immunoglobulin-like domain||Immunoglobulin-like domain superfamily||-||Immunoglobulin subtype||Immunoglobulin V-set domain||CD80-like, immunoglobulin C2-set||Immunoglobulin-like fold
ENSMUSG00000022678	4403.87	2647.78	0.73399	2.2081e-08	6.0732e-07	Nde1	-||NUDE family||NUDE domain
ENSMUSG00000022682	2645.46	2074.68	0.35063	9.2707e-05	0.0012718	Rrn3	RNA polymerase I specific transcription initiation factor RRN3||Armadillo-like helical||Armadillo-type fold
ENSMUSG00000022686	152.268	18.3814	3.0503	9.2438e-24	9.427e-22	B3gnt5	Glycosyl transferase, family 31
ENSMUSG00000022698	5126.93	3557.35	0.52729	4.626e-10	1.5631e-08	Naa50	Acyl-CoA N-acyltransferase||GNAT domain
ENSMUSG00000022701	227.64	326.054	-0.51835	0.0012956	0.012704	Ccdc191	Coiled-coil domain-containing protein 191
ENSMUSG00000022704	656.039	477.374	0.45866	0.00017913	0.0022835	Qtrt2	tRNA-guanine(15) transglycosylase-like||Queuine tRNA-ribosyltransferase accessory subunit QTRTD1||Queuine tRNA-ribosyltransferase-like
ENSMUSG00000022742	4003.14	5581.6	-0.47955	1.6052e-06	3.212e-05	Cpox	Coproporphyrinogen III oxidase, conserved site||Coproporphyrinogen III oxidase, aerobic||Oxygen-dependent coproporphyrinogen III oxidase superfamily
ENSMUSG00000022754	93.867	21.5294	2.1243	9.8057e-06	0.00016734	Tmem45a	Protein of unknown function DUF716 (TMEM45)
ENSMUSG00000022756	767.618	996.702	-0.37677	0.0005309	0.0058993	Slc7a4	Amino acid/polyamine transporter I||Cationic amino acid transporter, C-terminal
ENSMUSG00000022759	3.20289	36.2367	-3.5	0.00027149	0.0033036	Lrrc74b	Leucine-rich repeat||Leucine-rich repeat domain superfamily
ENSMUSG00000022762	1961.33	2545.38	-0.37605	1.9214e-05	0.00030806	Ncam2	Neural cell adhesion||Immunoglobulin-like domain superfamily||Fibronectin type III superfamily||Fibronectin type III||Immunoglobulin V-set domain||Immunoglobulin subtype||Immunoglobulin-like fold||Immunoglobulin subtype 2||Immunoglobulin I-set||Immunoglobulin-like domain
ENSMUSG00000022763	2938.05	3857.82	-0.39293	6.5333e-06	0.00011534	Aifm3	Pyridine nucleotide-disulphide oxidoreductase, class-II||Rieske [2Fe-2S] iron-sulphur domain superfamily||FAD/NAD(P)-binding domain||Rieske [2Fe-2S] iron-sulphur domain||FAD/NAD(P)-binding domain superfamily||FAD/NAD-linked reductase, dimerisation domain superfamily||Reductase, C-terminal
ENSMUSG00000022781	2955.13	2107.61	0.48761	5.1285e-08	1.3205e-06	Pak2	Protein kinase, ATP binding site||Protein kinase domain||Serine/threonine-protein kinase PAK2/3||Protein kinase-like domain superfamily||Serine/threonine-protein kinase, active site||p21 activated kinase binding domain||CRIB domain||CRIB domain superfamily||p21-activated kinase 2, catalytic domain
ENSMUSG00000022799	2209.73	1481.71	0.57661	3.7043e-10	1.2694e-08	Arhgap31	Rho GTPase activation protein||Rho GTPase-activating protein domain
ENSMUSG00000022807	1264.93	980.766	0.36708	0.00040099	0.0046417	Osbpl11	Oxysterol-binding protein, conserved site||Pleckstrin homology domain||Oxysterol-binding protein||PH-like domain superfamily||Oxysterol-binding protein superfamily
ENSMUSG00000022817	2001.84	2650.25	-0.4048	4.0453e-05	0.00059942	Itgb5	Integrin beta tail domain superfamily||von Willebrand factor, type A||von Willebrand factor A-like domain superfamily||Integrin domain superfamily||PSI domain||Integrin beta subunit, cytoplasmic domain||Integrin beta subunit, tail||Integrin beta subunit, cytoplasmic domain superfamily||Integrin beta subunit||Integrin beta subunit, VWA domain||Cytochrome c1, transmembrane anchor, C-terminal||Integ…
ENSMUSG00000022822	6420.44	9405.66	-0.55086	5.1382e-12	2.1268e-10	Abcc5	P-loop containing nucleoside triphosphate hydrolase||AAA+ ATPase domain||ABC transporter, conserved site||ABC transporter-like||ABC transporter type 1, transmembrane domain||ABC transporter type 1, transmembrane domain superfamily||Multidrug resistance-associated protein 5
ENSMUSG00000022828	1003.51	790.205	0.34476	0.0038484	0.032062	Gtf2e1	TFIIEalpha/SarR/Rpc3 HTH domain||Zinc finger, TFIIB-type||Transcription initiation factor IIE subunit alpha, N-terminal||Transcription factor TFIIE alpha subunit, C-terminal||Winged helix-like DNA-binding domain superfamily||Transcription factor TFE/TFIIEalpha HTH domain
ENSMUSG00000022829	1098.81	1403.17	-0.35275	0.00026735	0.0032561	Stxbp5l	WD40-repeat-containing domain||Lethal giant larvae (Lgl)-like, C-terminal domain||WD40/YVTN repeat-like-containing domain superfamily||Synaptobrevin||Lethal(2) giant larvae protein||Lethal giant larvae homologue 2||WD40-repeat-containing domain superfamily||WD40 repeat||WD40 repeat, conserved site
ENSMUSG00000022831	555.195	240.466	1.2072	3.6079e-10	1.2377e-08	Hcls1	SH3 domain||Hematopoietic lineage cell-specific protein||-||Hs1/Cortactin||SH3-like domain superfamily
ENSMUSG00000022836	1441.73	463.157	1.6382	3.2646e-33	5.2634e-31	Mylk	Immunoglobulin-like domain superfamily||Fibronectin type III superfamily||Fibronectin type III||Immunoglobulin subtype||Immunoglobulin-like fold||Serine/threonine-protein kinase, active site||Immunoglobulin subtype 2||Protein kinase-like domain superfamily||Immunoglobulin I-set||Immunoglobulin-like domain||Protein kinase domain||Protein kinase, ATP binding site||Myosin Light Chain Kinase 1, Kinas…
ENSMUSG00000022843	2339.08	3200.92	-0.45255	4.8211e-07	1.0634e-05	Clcn2	Chloride channel, voltage gated||Chloride channel ClC-2||Chloride channel, core||CBS domain||-
ENSMUSG00000022844	117.585	65.9014	0.83532	0.0010697	0.010805	Pdia5	Thioredoxin domain||Thioredoxin-like superfamily||Thioredoxin, conserved site
ENSMUSG00000022847	69.901	112.593	-0.68773	0.005475	0.043053	Thpo	Erythropoietin/thrombopoeitin, conserved site||Erythropoietin/thrombopoeitin||Four-helical cytokine-like, core||Thrombopoeitin
ENSMUSG00000022858	3550.74	2180.79	0.70327	2.4655e-12	1.0594e-10	Tra2b	RNA recognition motif domain||RNA-binding domain superfamily||-
ENSMUSG00000022863	537.061	204.83	1.3907	8.8082e-13	4.0192e-11	Btg3	Anti-proliferative protein||BTG domain-like superfamily
ENSMUSG00000022876	151.976	39.9198	1.9287	5.2804e-12	2.1803e-10	Samsn1	Sterile alpha motif domain||SH3 domain||SAM/SH3 domain-containing||Sterile alpha motif/pointed domain superfamily||SH3-like domain superfamily
ENSMUSG00000022883	2822.92	3754.07	-0.41127	1.3659e-06	2.7738e-05	Robo1	Immunoglobulin I-set||Immunoglobulin-like domain||Fibronectin type III||Roundabout homologue 1||Immunoglobulin subtype||Immunoglobulin V-set domain||Immunoglobulin subtype 2||Immunoglobulin-like fold||Immunoglobulin-like domain superfamily||Fibronectin type III superfamily
ENSMUSG00000022885	1430.62	1077.18	0.40938	0.00023531	0.0029194	St6gal1	Glycosyl transferase family 29||-||Sialyltransferase
ENSMUSG00000022893	6608.32	1284	2.3636	1.5039e-12	6.6563e-11	Adamts1	ADAM-TS Spacer 1||Peptidase M12B, propeptide||Peptidase M12B, ADAM-TS||ADAM, cysteine-rich||Thrombospondin type-1 (TSP1) repeat||Metallopeptidase, catalytic domain superfamily||Thrombospondin type-1 (TSP1) repeat superfamily||Peptidase M12B, ADAM/reprolysin||Peptidase M12B, ADAM-TS1
ENSMUSG00000022894	1148.41	625.137	0.8774	5.034e-16	3.1159e-14	Adamts5	Metallopeptidase, catalytic domain superfamily||Thrombospondin type-1 (TSP1) repeat||ADAM, cysteine-rich||Peptidase M12B, ADAM-TS||Peptidase M12B, ADAM/reprolysin||Thrombospondin type-1 (TSP1) repeat superfamily||Peptidase M12B, ADAM-TS5||Peptidase M12B, propeptide||ADAM-TS Spacer 1
ENSMUSG00000022895	2819	1590.39	0.8258	2.4601e-15	1.4214e-13	Ets2	Winged helix DNA-binding domain superfamily||Transforming protein C-ets||Ets domain||Transforming protein C-ets-2||Winged helix-like DNA-binding domain superfamily||Sterile alpha motif/pointed domain superfamily||Pointed domain
ENSMUSG00000022900	41.2448	132.209	-1.6805	5.5901e-09	1.6632e-07	Ildr1	LISCH7||Immunoglobulin-like domain||Immunoglobulin-like domain superfamily||Immunoglobulin-like fold||Immunoglobulin subtype
ENSMUSG00000022901	184.787	54.0123	1.7745	6.8932e-09	2.0277e-07	Cd86	Immunoglobulin-like domain superfamily||Immunoglobulin-like domain||Immunoglobulin-like fold||Immunoglobulin V-set domain
ENSMUSG00000022906	442.933	140.065	1.661	3.1045e-13	1.4784e-11	Parp9	Macro domain||Poly(ADP-ribose) polymerase, catalytic domain||-
ENSMUSG00000022911	632.918	466.762	0.43933	0.00053945	0.0059806	Arl13b	Small GTP-binding protein domain||Small GTPase superfamily, ARF/SAR type||P-loop containing nucleoside triphosphate hydrolase||Small GTPase superfamily, ARF type
ENSMUSG00000022912	2870.1	825.817	1.7972	8.6785e-40	1.8138e-37	Pros1	EGF-type aspartate/asparagine hydroxylation site||EGF-like calcium-binding, conserved site||Laminin G domain||Gamma-carboxyglutamic acid-rich (GLA) domain superfamily||Growth factor receptor cysteine-rich domain superfamily||EGF-like calcium-binding domain||EGF-like domain||Vitamin K-dependent protein S||Coagulation factor, subgroup, Gla domain superfamily||Concanavalin A-like lectin/glucanase do…
ENSMUSG00000022935	490.971	658.599	-0.42376	0.0044242	0.036025	Grik1	Ionotropic glutamate receptor, metazoa||Periplasmic binding protein-like I||Ionotropic glutamate receptor, L-glutamate and glycine-binding domain||Receptor, ligand binding region||Ionotropic glutamate receptor
ENSMUSG00000022951	5756.78	2259.54	1.3492	7.6628e-56	2.7897e-53	Rcan1	Calcipressin||RNA-binding domain superfamily||Calcipressin-1, RNA recognition motif||Calcipressin-1
ENSMUSG00000022952	368.801	66.0294	2.4817	4.9399e-26	5.6889e-24	Runx1	p53-like transcription factor, DNA-binding||Runx, C-terminal domain||-||p53/RUNT-type transcription factor, DNA-binding domain superfamily||Runt-related transcription factor RUNX||Acute myeloid leukemia 1 protein (AML1)/Runt||Runx, central domain superfamily||Runt domain
ENSMUSG00000022962	1933.31	1547.35	0.32128	0.00056942	0.0062637	Gart	ATP-grasp fold, subdomain 1||PurM-like, C-terminal domain superfamily||PurM-like, N-terminal domain superfamily||-||Phosphoribosylglycinamide synthetase, ATP-grasp (A) domain||Pre-ATP-grasp domain superfamily||Phosphoribosylformylglycinamidine cyclo-ligase||PurM-like, N-terminal domain||Phosphoribosylglycinamide synthetase||Formyl transferase, N-terminal||PurM-like, C-terminal domain||Formyl tran…
ENSMUSG00000022967	1649.99	1326.68	0.31464	0.00087106	0.0090368	Ifnar1	Fibronectin type III||Immunoglobulin-like fold||Interferon alpha/beta receptor 1||Interferon/interleukin receptor domain||Fibronectin type III superfamily||-
ENSMUSG00000022969	220.898	130.16	0.7631	4.5532e-05	0.00066853	Il10rb	Fibronectin type III||Immunoglobulin-like fold||Interferon/interleukin receptor domain||Fibronectin type III superfamily||-
ENSMUSG00000022971	738.974	568.062	0.37948	0.0038111	0.031798	Ifnar2	-||Interferon/interleukin receptor domain||Fibronectin type III superfamily||Immunoglobulin-like fold||Fibronectin type III
ENSMUSG00000022974	1403.7	1701.04	-0.27718	0.0037003	0.031058	Paxbp1	GC-rich sequence DNA-binding factor||GC-rich sequence DNA-binding factor domain||-
ENSMUSG00000022999	576.233	414.558	0.47508	0.00017854	0.0022777	Lmbr1l	LMBR1-like membrane protein||Lipocalin-interacting membrane receptor
ENSMUSG00000023000	55.3973	15.7181	1.8174	0.00011836	0.0015814	Dhh	Hint domain N-terminal||Hedgehog protein||Hedgehog signalling/DD-peptidase zinc-binding domain superfamily||Hint domain superfamily||Hint domain C-terminal||Hedgehog, N-terminal signalling domain||Intein N-terminal splicing region||Hedgehog protein, Hint domain
ENSMUSG00000023007	2238.75	3075.12	-0.45795	7.292e-05	0.0010206	Prpf40b	WW domain||-||FF domain||WW domain superfamily||FF domain superfamily
ENSMUSG00000023017	3375.44	4683.77	-0.4726	3.9845e-07	8.9106e-06	Asic1	Epithelial sodium channel||Epithelial sodium channel, conserved site||Epithelial sodium channel, chordates
ENSMUSG00000023019	19648.5	8271.64	1.2482	5.5922e-56	2.0807e-53	Gpd1	Glycerol-3-phosphate dehydrogenase, NAD-dependent, C-terminal||Glycerol-3-phosphate dehydrogenase, NAD-dependent, eukaryotic||NAD(P)-binding domain superfamily||Glycerol-3-phosphate dehydrogenase, NAD-dependent, N-terminal||6-phosphogluconate dehydrogenase, domain 2||6-phosphogluconate dehydrogenase-like, C-terminal domain superfamily||Glycerol-3-phosphate dehydrogenase, NAD-dependent
ENSMUSG00000023022	1011.9	677.944	0.57782	0.0057153	0.044454	Lima1	-||LIM domain and actin-binding protein 1||Zinc finger, LIM-type
ENSMUSG00000023025	2860.93	2077.33	0.46175	2.8958e-07	6.6024e-06	Larp4	La-type HTH domain||-||LARP4, RNA recognition motif||RNA-binding domain superfamily||Winged helix DNA-binding domain superfamily||Winged helix-like DNA-binding domain superfamily
ENSMUSG00000023027	699.23	429.463	0.70323	7.2941e-09	2.1401e-07	Atf1	cAMP-dependent transcription factor ATF1||cAMP response element binding (CREB) protein||Coactivator CBP, pKID||-||Basic-leucine zipper domain||Transcription factor, Skn-1-like, DNA-binding domain superfamily
ENSMUSG00000023031	751.511	544.009	0.46616	9.0079e-05	0.0012408	Cela1	Peptidase S1, PA clan||Serine proteases, trypsin domain||Peptidase S1A, chymotrypsin family||Serine proteases, trypsin family, histidine active site||Serine proteases, trypsin family, serine active site
ENSMUSG00000023034	1263.63	540.668	1.2248	2.7201e-07	6.2398e-06	Nr4a1	Zinc finger, nuclear hormone receptor-type||Nuclear hormone receptor, ligand-binding domain||-||Nuclear hormone receptor-like domain superfamily||Orphan nuclear receptor, HMR type||Nuclear hormone receptor||Orphan nuclear receptor||Zinc finger, NHR/GATA-type
ENSMUSG00000023045	54.2407	3.25207	4.0599	8.2213e-13	3.7769e-11	Soat2	Sterol O-acyltransferase, ACAT/DAG/ARE types||-||Membrane bound O-acyl transferase, MBOAT||Sterol O-acyltransferase, metazoa
ENSMUSG00000023051	851.304	1104.32	-0.37541	0.00043415	0.0049711	Tarbp2	RISC-loading complex subunit TRBP2||Double-stranded RNA-binding domain||-
ENSMUSG00000023055	2545.84	3473.21	-0.44813	2.0409e-07	4.7987e-06	Calcoco1	Calcium binding and coiled-coil domain-like||-
ENSMUSG00000023067	13606	1531.76	3.151	1.508e-42	3.4734e-40	Cdkn1a	Cyclin-dependent kinase inhibitor 1, vertebrate||Cyclin-dependent kinase inhibitor
ENSMUSG00000023068	4470.14	3648.42	0.29305	0.00047484	0.005362	Nus1	Decaprenyl diphosphate synthase-like superfamily||Decaprenyl diphosphate synthase-like
ENSMUSG00000023079	781.362	1077.57	-0.46371	1.6584e-05	0.00026891	Gtf2ird1	GTF2I-like repeat||GTF2I-like repeat superfamily||Transcription factor II-I||-
ENSMUSG00000023087	2366.39	1242.58	0.92935	9.9076e-21	8.5113e-19	Noct	Nocturnin, deadenylase domain||-||Endonuclease/exonuclease/phosphatase superfamily||Endonuclease/exonuclease/phosphatase
ENSMUSG00000023150	4887.99	4074.65	0.26256	0.0014888	0.014276	Ivns1abp	Influenza virus NS1A-binding protein||BTB-kelch protein||BTB/Kelch-associated||SKP1/BTB/POZ domain superfamily||-||Kelch-type beta propeller||Kelch repeat type 1||BTB/POZ domain
ENSMUSG00000023186	2437.88	1840.23	0.40574	3.3779e-05	0.00051125	Vwa5a	von Willebrand factor, type A||-||von Willebrand factor A-like domain superfamily||Immunoglobulin-like fold||VIT domain
ENSMUSG00000023191	710.549	1110.14	-0.64374	0.00010586	0.0014342	P3h3	Tetratricopeptide-like helical domain superfamily||Oxoglutarate/iron-dependent dioxygenase||-||Prolyl 4-hydroxylase, alpha subunit
ENSMUSG00000023249	1477.16	588.098	1.3287	3.134e-35	5.4138e-33	Parp3	WGR domain superfamily||Poly(ADP-ribose) polymerase, catalytic domain||Poly(ADP-ribose) polymerase, regulatory domain||Poly [ADP-ribose] polymerase 3||WGR domain||Poly(ADP-ribose) polymerase, regulatory domain superfamily
ENSMUSG00000023266	2209.46	2879.74	-0.38225	0.00075507	0.0080067	Frs3	PH-like domain superfamily||-||IRS-type PTB domain
ENSMUSG00000023267	157.935	65.1138	1.2783	7.6155e-08	1.91e-06	Gabrr2	Neurotransmitter-gated ion-channel ligand-binding domain superfamily||Neurotransmitter-gated ion-channel, conserved site||Neurotransmitter-gated ion-channel transmembrane domain||Neurotransmitter-gated ion-channel||Gamma-aminobutyric-acid A receptor, Rho||Neurotransmitter-gated ion-channel ligand-binding domain||Gamma-aminobutyric-acid A receptor, Rho2||Neurotransmitter-gated ion-channel transmem…
ENSMUSG00000023272	690.506	485.231	0.50898	3.0293e-05	0.0004641	Creld2	Laminin EGF domain||Domain of unknown function DUF3456||Furin-like repeat||EGF-like, conserved site||EGF-like calcium-binding domain||EGF-like domain||Growth factor receptor cysteine-rich domain superfamily||EGF-like calcium-binding, conserved site||EGF-type aspartate/asparagine hydroxylation site
ENSMUSG00000023286	2055.52	1580.33	0.37928	3.6085e-05	0.00054132	Ube2j2	Ubiquitin-conjugating enzyme/RWD-like||Ubiquitin-conjugating enzyme E2
ENSMUSG00000023328	12405.9	14600.3	-0.23497	0.0038373	0.031977	Ache	Cholinesterase||Carboxylesterase type B, active site||Alpha/Beta hydrolase fold||Carboxylesterase, type B||Carboxylesterase type B, conserved site||Acetylcholinesterase, tetramerisation domain||-
ENSMUSG00000023341	127.02	72.1916	0.81515	0.00083781	0.0087416	Mx2	P-loop containing nucleoside triphosphate hydrolase||Dynamin, GTPase domain||Dynamin, GTPase region, conserved site||Dynamin central domain||GTPase effector domain||-||Dynamin superfamily||Dynamin GTPase effector||Dynamin-type guanine nucleotide-binding (G) domain
ENSMUSG00000023348	510.363	400.724	0.34892	0.0056776	0.044242	Trip6	Zinc finger, LIM-type||-
ENSMUSG00000023349	36.249	9.77281	1.8911	0.00028596	0.0034541	Clec4n	C-type lectin-like||-||C-type lectin, conserved site||C-type lectin-like/link domain superfamily||C-type lectin fold||CD209-like, C-type lectin-like domain
ENSMUSG00000023367	1203.37	760.237	0.66255	5.8147e-10	1.9493e-08	Tmem176a	-||Transmembrane protein 176A/B||CD20-like family
ENSMUSG00000023495	7832.48	9582.77	-0.29097	0.0031492	0.027043	Pcbp4	K Homology domain, type 1 superfamily||-||K homology domain-like, alpha/beta||K Homology domain, type 1||K Homology domain||Poly(rC)-binding protein 4
ENSMUSG00000023805	2709.34	3215.6	-0.24715	0.0048657	0.039177	Synj2	Synaptojanin-2||-||SAC domain||RNA-binding domain superfamily||Inositol polyphosphate-related phosphatase||Synaptojanin-2, RNA recognition motif||Domain of unknown function DUF1866||Endonuclease/exonuclease/phosphatase superfamily||Endonuclease/exonuclease/phosphatase||RNA recognition motif domain
ENSMUSG00000023827	4612.54	3409.84	0.43586	1.9441e-07	4.5838e-06	Agpat4	Acyltransferase, C-terminal domain||Phospholipid/glycerol acyltransferase||-
ENSMUSG00000023852	2574.01	1825.8	0.49549	4.4068e-08	1.1557e-06	Chd1	RIO kinase, conserved site||RIO2 kinase winged helix domain, N-terminal||Winged helix-like DNA-binding domain superfamily||Protein kinase-like domain superfamily||Chromo/chromo shadow domain||Helicase, C-terminal||Chromo domain, conserved site||RIO kinase||Chromo domain||Winged helix DNA-binding domain superfamily||Chromo-like domain superfamily||Serine/threonine-protein kinase Rio2||-||Domain of…
ENSMUSG00000023883	2232.92	1769.42	0.33566	0.00020194	0.0025464	Phf10	Zinc finger, RING/FYVE/PHD-type||Zinc finger, PHD-type||-||Zinc finger, PHD-finger||Zinc finger, FYVE/PHD-type
ENSMUSG00000023885	2284.19	1325.96	0.78465	4.6585e-17	3.0806e-15	Thbs2	Thrombospondin, type 3 repeat||Thrombospondin||Thrombospondin-2||Thrombospondin, C-terminal||TSP type-3 repeat||Laminin G domain||EGF-like, conserved site||Concanavalin A-like lectin/glucanase domain superfamily||VWFC domain||EGF-like calcium-binding domain||EGF-like domain||Thrombospondin type-1 (TSP1) repeat superfamily||EGF domain||Thrombospondin type-1 (TSP1) repeat||Thrombospondin, type 3-li…
ENSMUSG00000023905	3943.91	908.583	2.1179	1.4793e-81	9.4501e-79	Tnfrsf12a	Tumour necrosis factor receptor 12
ENSMUSG00000023909	4802.26	5734.95	-0.25607	0.0019672	0.018114	Paqr4	AdipoR/Haemolysin-III-related
ENSMUSG00000023912	1287.11	2079.4	-0.69203	2.4422e-13	1.183e-11	Slc25a27	Mitochondrial substrate/solute carrier||Mitochondrial carrier domain superfamily
ENSMUSG00000023918	14.7293	46.1327	-1.6471	0.0011628	0.0116	Adgrf4	GPCR, family 2-like||-||GPCR, family 2, secretin-like||GPS motif||GPCR family 2, Ig-hepta-like receptor
ENSMUSG00000023938	1220.54	1706.87	-0.48383	9.2095e-07	1.9343e-05	Aars2	Alanyl-tRNA synthetase, class IIc, N-terminal||Alanine-tRNA ligase, eukaryota/bacteria||Threonyl/alanyl tRNA synthetase, SAD||Threonyl/alanyl tRNA synthetase, class II-like, putative editing domain superfamily||Alanine-tRNA ligase, class IIc||Translation protein, beta-barrel domain superfamily||Alanyl-tRNA synthetase, class IIc, core domain||Alanine-tRNA ligase, class IIc, anti-codon-binding doma…
ENSMUSG00000023960	10234.8	11865.8	-0.21333	0.0055163	0.043325	Enpp5	-||Alkaline-phosphatase-like, core domain superfamily||Type I phosphodiesterase/nucleotide pyrophosphatase/phosphate transferase||Alkaline phosphatase-like, alpha/beta/alpha
ENSMUSG00000023971	945.451	687.541	0.45956	3.735e-05	0.00055782	Rrp36	rRNA biogenesis protein RRP36
ENSMUSG00000023988	1680.31	1064.35	0.65876	1.0829e-11	4.3338e-10	Bysl	Bystin
ENSMUSG00000024002	3967.91	3257.4	0.28466	0.00068114	0.0073376	Brd4	-||Bromodomain protein 4, C-terminal||Bromodomain-like superfamily||NET domain||Bromodomain, conserved site||Bromodomain
ENSMUSG00000024013	101.457	273.237	-1.4293	7.3594e-14	3.708e-12	Fgd2	Dbl homology (DH) domain||-||Zinc finger, RING/FYVE/PHD-type||Zinc finger, FYVE/PHD-type||Dbl homology (DH) domain superfamily||FGD1-4, C-terminal PH domain||Pleckstrin homology domain||FYVE zinc finger||PH-like domain superfamily||Zinc finger, FYVE-related
ENSMUSG00000024014	1550.71	653.082	1.2476	3.0469e-10	1.0516e-08	Pim1	Protein kinase domain||Serine/threonine-protein kinase pim-1/2/3||Protein kinase, ATP binding site||Protein kinase-like domain superfamily||Serine/threonine-protein kinase, active site
ENSMUSG00000024030	1735.45	2231.43	-0.36266	7.3012e-05	0.0010215	Abcg1	Pigment precursor permease/ProteinATP-binding cassette sub-family G||ABC transporter-like||ABC transporter, conserved site||AAA+ ATPase domain||P-loop containing nucleoside triphosphate hydrolase||ABC-2 type transporter||ABC transporter, G1
ENSMUSG00000024036	273.99	188.45	0.53994	0.0014351	0.013847	Slc37a1	Major facilitator superfamily||MFS transporter superfamily||Major facilitator superfamily domain||Sugar phosphate transporter
ENSMUSG00000024037	1370.04	1053.51	0.37901	0.00020546	0.0025841	Wdr4	Quinoprotein amine dehydrogenase, beta chain-like||WD40-repeat-containing domain||WD40/YVTN repeat-like-containing domain superfamily||tRNA (guanine-N(7)-)-methyltransferase non-catalytic subunit||WD40 repeat||WD40-repeat-containing domain superfamily||-
ENSMUSG00000024042	1004.54	379.312	1.4051	4.3618e-22	4.0131e-20	Sik1	Protein kinase domain||Protein kinase, ATP binding site||Protein kinase-like domain superfamily||Ubiquitin-associated domain||Salt-Inducible kinase, catalytic domain||Serine/threonine-protein kinase, active site||Serine/threonine-protein kinase, SIK1/2
ENSMUSG00000024044	25343	30818.3	-0.2822	0.00019985	0.0025248	Epb41l3	FERM conserved site||PH-like domain superfamily||FERM adjacent (FA)||FERM central domain||Ezrin/radixin/moesin-like||FERM, N-terminal||Band 4.1-like protein 3||Band 4.1, C-terminal||Band 4.1 domain||SAB domain||FERM domain||FERM superfamily, second domain||FERM/acyl-CoA-binding protein superfamily||FERM, C-terminal PH-like domain||Ubiquitin-like domain superfamily||-
ENSMUSG00000024048	2683.59	1554.63	0.7876	4.573e-07	1.0126e-05	Myl12a	EF-Hand 1, calcium-binding site||EF-hand domain pair||EF-hand domain
ENSMUSG00000024053	2770.76	1730.43	0.67915	3.9748e-06	7.3742e-05	Emilin2	EMI domain||C1q domain||Tumour necrosis factor-like domain superfamily
ENSMUSG00000024054	1362.97	1103.4	0.3048	0.0031122	0.026751	Smchd1	SMCs flexible hinge||Histidine kinase/HSP90-like ATPase||Histidine kinase/HSP90-like ATPase superfamily||SMCs flexible hinge superfamily
ENSMUSG00000024063	6318.35	5240.87	0.26974	0.00083746	0.0087407	Lbh	-||Protein LBH
ENSMUSG00000024066	1323.66	144.511	3.1953	2.2755e-102	2.4853e-99	Xdh	[2Fe-2S]-binding||CO dehydrogenase flavoprotein, C-terminal||Aldehyde oxidase/xanthine dehydrogenase, molybdopterin binding||Aldehyde oxidase/xanthine dehydrogenase, a/b hammerhead||2Fe-2S ferredoxin, iron-sulphur binding site||CO dehydrogenase flavoprotein-like, FAD-binding, subdomain 2||Aldehyde oxidase/xanthine dehydrogenase||Aldehyde oxidase/xanthine dehydrogenase, a/b hammerhead superfamily|…
ENSMUSG00000024070	1257.49	1665.55	-0.40545	2.6042e-05	0.0004052	Prkd3	Diacylglycerol/phorbol-ester binding||Protein kinase-like domain superfamily||Protein kinase domain||Protein kinase, ATP binding site||Protein kinase C mu-related||PH-like domain superfamily||Pleckstrin homology domain||Protein kinase C-like, phorbol ester/diacylglycerol-binding domain||Serine/threonine-protein kinase, active site
ENSMUSG00000024079	772.606	550.763	0.4883	3.945e-05	0.00058686	Eif2ak2	Protein kinase-like domain superfamily||Protein kinase, ATP binding site||Protein kinase domain||Interferon-induced, double-stranded RNA-activated protein kinase||Double-stranded RNA-binding domain||Serine/threonine-protein kinase, active site
ENSMUSG00000024081	1571.47	1130.95	0.47458	2.2402e-06	4.3342e-05	Cebpz	Armadillo-like helical||Armadillo-type fold||CCAAT-binding factor
ENSMUSG00000024084	662.28	953.95	-0.52647	9.2353e-06	0.00015856	Qpct	M28 Zn-Peptidase Glutaminyl Cyclase||Peptidase M28
ENSMUSG00000024085	883.255	500.351	0.81989	6.155e-05	0.00087452	Man2a1	Glycoside hydrolase/deacetylase, beta/alpha-barrel||Glycoside hydrolase family 38, N-terminal domain||Glycoside hydrolase family 38, central domain||Glycoside hydrolase 38/57, N-terminal||Galactose mutarotase-like domain superfamily||Glycosyl hydrolase family 38, C-terminal||Glycoside hydrolase family 38, central domain superfamily||Glycoside hydrolase families 57/38, central domain superfamily
ENSMUSG00000024087	815.3	290.242	1.4901	0.00035798	0.0042159	Cyp1b1	Cytochrome P450 1B1||Cytochrome P450, conserved site||Cytochrome P450 superfamily||Cytochrome P450||Cytochrome P450, E-class, group I
ENSMUSG00000024097	3567.67	2887.03	0.3054	0.00057367	0.0063002	Srsf7	RNA-binding domain superfamily||RNA recognition motif domain||Zinc finger, CCHC-type superfamily||Zinc finger, CCHC-type||SRSF7, RNA recognition motif
ENSMUSG00000024127	17313.5	20399	-0.23661	0.0015061	0.014425	Prepl	Peptidase S9A, N-terminal domain||Alpha/Beta hydrolase fold||Peptidase S9A, prolyl oligopeptidase||Peptidase S9, prolyl oligopeptidase, catalytic domain
ENSMUSG00000024140	8346.4	6102.22	0.45182	1.5554e-08	4.3997e-07	Epas1	PAS domain||PAS fold-3||Myc-type, basic helix-loop-helix (bHLH) domain||HIF-1 alpha, transactivation domain, C-terminal||Hypoxia-inducible factor, alpha subunit||PAS fold||Helix-loop-helix DNA-binding domain superfamily||PAS domain superfamily||PAC motif||Nuclear translocator
ENSMUSG00000024150	3008.44	2488.27	0.27387	0.0016572	0.015651	Mcfd2	EF-Hand 1, calcium-binding site||-||EF-hand domain pair||EF-hand domain
ENSMUSG00000024169	1019.15	1278.57	-0.32716	0.0013662	0.013284	Ift140	Tetratricopeptide-like helical domain superfamily||WD40 repeat||WD40-repeat-containing domain superfamily||Six-bladed beta-propeller, TolB-like||WD40/YVTN repeat-like-containing domain superfamily
ENSMUSG00000024175	185.945	54.5792	1.7685	8.7947e-14	4.3984e-12	Tekt4	Tektin
ENSMUSG00000024176	2067.7	3537.29	-0.77461	8.9428e-18	6.1542e-16	Sox8	Transcription factor SOX-8||Sox developmental protein N-terminal||High mobility group box domain superfamily||High mobility group box domain
ENSMUSG00000024180	1395.61	1928.01	-0.46622	1.0676e-06	2.2082e-05	Tmem8	EGF-like, conserved site||NGX6/PGAP6/MYMK||EGF-like domain
ENSMUSG00000024186	757.872	1267.33	-0.74177	3.158e-12	1.3399e-10	Rgs11	RGS domain superfamily||DEP domain||Winged helix-like DNA-binding domain superfamily||Winged helix DNA-binding domain superfamily||RGS, subdomain 1||G-protein gamma-like domain superfamily||RGS domain||G-protein gamma-like domain
ENSMUSG00000024187	833.246	1038.94	-0.3183	0.0040147	0.033227	Fam234a	Quinoprotein alcohol dehydrogenase-like superfamily||-
ENSMUSG00000024190	3180.49	1099.5	1.5324	1.1702e-08	3.3549e-07	Dusp1	Rhodanese-like domain||Atypical dual specificity phosphatase||Protein-tyrosine phosphatase, catalytic||Dual specificity phosphatase||Rhodanese-like domain superfamily||Dual specificity phosphatase, catalytic domain||Atypical dual specificity phosphatase, subfamily B||Protein-tyrosine phosphatase, active site||Mitogen-activated protein (MAP) kinase phosphatase||Tyrosine specific protein phosphatas…
ENSMUSG00000024193	1911.32	2507.45	-0.39165	0.00010101	0.0013746	Phf1	Zinc finger, RING/FYVE/PHD-type||Polycomb-like MTF2 factor 2, C-terminal domain||Tudor domain||Zinc finger, PHD-finger||Zinc finger, PHD-type, conserved site||PHD finger protein 1||Zinc finger, FYVE/PHD-type||Zinc finger, PHD-type
ENSMUSG00000024197	2634.98	3903.18	-0.56686	0.0040613	0.033555	Plin3	Perilipin
ENSMUSG00000024210	343.05	138.883	1.3045	1.5653e-14	8.3991e-13	Ip6k3	Inositol polyphosphate kinase
ENSMUSG00000024211	294.762	444.986	-0.59421	2.2839e-05	0.00035934	Grm8	-||GPCR, family 3, nine cysteines domain||GPCR family 3, C-terminal||GPCR, family 3, metabotropic glutamate receptor||GPCR, family 3, conserved site||Receptor, ligand binding region||GPCR, family 3||GPCR, family 3, metabotropic glutamate receptor 8||Periplasmic binding protein-like I
ENSMUSG00000024220	2337.33	2885.73	-0.30408	0.001527	0.014593	Zfp523	Zinc finger, RING/FYVE/PHD-type||Zinc finger C2H2-type||-||Zinc finger C2H2 superfamily
ENSMUSG00000024222	5790.43	1022.25	2.5019	7.2711e-167	2.4618e-163	Fkbp5	Tetratricopeptide-like helical domain superfamily||Peptidyl-prolyl cis-trans isomerase FKBP5||Tetratricopeptide repeat 1||Tetratricopeptide repeat-containing domain||Peptidyl-prolyl cis-trans isomerase, FKBP-type||FKBP-type peptidyl-prolyl cis-trans isomerase domain||Tetratricopeptide repeat
ENSMUSG00000024232	313.629	158.767	0.98215	9.419e-07	1.9771e-05	Bambi	BMP and activin membrane-bound inhibitor
ENSMUSG00000024235	249.451	30.6831	3.0232	2.5578e-36	4.7066e-34	Map3k8	Serine/threonine-protein kinase, active site||Protein kinase-like domain superfamily||Protein kinase domain||Mitogen-activated protein (MAP) kinase kinase kinase 8||-
ENSMUSG00000024236	948.564	730.573	0.37672	0.00040084	0.0046415	Svil	-||Villin/Gelsolin||Villin headpiece domain superfamily||ADF-H/Gelsolin-like domain superfamily||Supervillin||Villin headpiece||Gelsolin-like domain
ENSMUSG00000024256	1074.27	744.373	0.52927	1.1535e-06	2.3743e-05	Adcyap1	Glucagon/GIP/secretin/VIP
ENSMUSG00000024261	5777.89	4490.46	0.36368	1.6338e-05	0.0002653	Syt4	Synaptotagmin-4||C2 domain superfamily||C2 domain||Synaptotagmin
ENSMUSG00000024276	1350.42	1018.77	0.40657	5.5056e-05	0.00079154	Zfp397	SCAN domain||Zinc finger C2H2 superfamily||-||Retrovirus capsid, C-terminal||Zinc finger C2H2-type
ENSMUSG00000024277	12022.4	14433.7	-0.26372	0.00084096	0.0087718	Mapre2	Calponin-like domain superfamily||Calponin homology domain||EB1, C-terminal domain superfamily||EB1, C-terminal||-||EB2, vertebrate||Microtubule-associated protein RP/EB
ENSMUSG00000024290	1476.56	1167.14	0.33927	0.00049788	0.0055745	Rock1	Protein kinase, ATP binding site||Protein kinase domain||Protein kinase-like domain superfamily||Rho binding domain||Rho-associated protein kinase 1/2||Rho-associated protein kinase 1, HR1||PH-like domain superfamily||AGC-kinase, C-terminal||Serine/threonine-protein kinase, active site||Rho-associated protein kinase 1||Protein kinase C-like, phorbol ester/diacylglycerol-binding domain||Pleckstrin…
ENSMUSG00000024299	841.663	1405.62	-0.73989	8.1279e-07	1.7213e-05	Adamts10	-||Peptidase M12B, propeptide||PLAC||ADAM-TS Spacer 1||Metallopeptidase, catalytic domain superfamily||Thrombospondin type-1 (TSP1) repeat||Peptidase M12B, ADAM-TS||Peptidase M12B, ADAM/reprolysin||Thrombospondin type-1 (TSP1) repeat superfamily
ENSMUSG00000024312	751.81	435.859	0.78651	8.5644e-11	3.1382e-09	Wdr46	WD40-repeat-containing domain||WD40/YVTN repeat-like-containing domain superfamily||WD40 repeat||BING4, C-terminal domain||WD40-repeat-containing domain superfamily
ENSMUSG00000024317	527.556	378.822	0.47781	0.00027373	0.0033266	Rnf138	Zinc finger, RING-type||Zinc finger C2HC RNF-type||Drought induced 19 protein type, zinc-binding domain||Zinc finger, RING/FYVE/PHD-type
ENSMUSG00000024325	1799.67	2506.91	-0.47818	2.7e-05	0.00041915	Ring1	RAWUL domain||Zinc finger, RING-type, conserved site||Zinc finger, RING-type||Zinc finger, RING/FYVE/PHD-type
ENSMUSG00000024330	2087.35	4184.89	-1.0035	3.8786e-06	7.2115e-05	Col11a2	Insect cysteine-rich antifreeze protein||Laminin G domain||Concanavalin A-like lectin/glucanase domain superfamily||Fibrillar collagen, C-terminal||Collagen triple helix repeat
ENSMUSG00000024335	12590.6	10911.6	0.20647	0.0058438	0.045256	Brd2	Bromodomain||Bromodomain, conserved site||NET domain||-||Bromodomain-like superfamily
ENSMUSG00000024338	188.821	90.0766	1.0678	2.7003e-06	5.1653e-05	Psmb8	Proteasome subunit beta type-8||Peptidase T1A, proteasome beta-subunit||Proteasome beta-type subunit, conserved site||Nucleophile aminohydrolases, N-terminal||Proteasome, subunit alpha/beta||Proteasome B-type subunit
ENSMUSG00000024347	4320.97	7101.91	-0.71685	2.7656e-18	1.9797e-16	Psd2	Pleckstrin homology domain||Sec7, C-terminal domain superfamily||Sec7 domain superfamily||Sec7 domain||Pleckstrin homology domain, spectrin-type||PH-like domain superfamily||-
ENSMUSG00000024349	321.618	134.21	1.2609	9.2366e-12	3.7364e-10	Tmem173	Stimulator of interferon genes protein||Stimulator of interferon genes protein, C-terminal
ENSMUSG00000024352	204.837	289.128	-0.49723	0.0022836	0.020673	Spata24	Spermatogenesis-associated protein 24
ENSMUSG00000024357	911.008	1111.09	-0.28644	0.0064498	0.049007	Sil1	Armadillo-type fold||Armadillo-like helical
ENSMUSG00000024359	11590.7	9687.5	0.25877	0.0012227	0.012094	Hspa9	Heat shock protein 70 family||Heat shock protein 70kD, C-terminal domain superfamily||Heat shock protein 70kD, peptide-binding domain superfamily||Chaperone DnaK||Heat shock protein 70, conserved site
ENSMUSG00000024360	4402.27	2571.28	0.77576	1.97e-19	1.5548e-17	Etf1	50S ribosomal protein L30e-like||Peptide chain release factor eRF1/aRF1||eRF1 domain 2||-||eRF1 domain 3||Peptide Chain Release Factor eRF1/aRF1, N-terminal||eRF1 domain 1/Pelota-like
ENSMUSG00000024378	3871.93	2899.36	0.41732	1.7439e-06	3.4589e-05	Stard4	START domain||START-like domain superfamily
ENSMUSG00000024381	13872.7	18631.7	-0.42551	5.3492e-08	1.3741e-06	Bin1	Amphiphysin 2||Amphiphysin 2, SH3 domain||Amphiphysin, isoform 1||SH3 domain||SH3-like domain superfamily||Amphiphysin||BAR domain||AH/BAR domain superfamily
ENSMUSG00000024395	372.705	647.436	-0.7967	7.8706e-10	2.5922e-08	Lims2	LIM and senescent cell antigen-like-containing domain protein 1||-||Zinc finger, LIM-type
ENSMUSG00000024397	95.7683	174.681	-0.8671	5.6077e-05	0.00080418	Aif1	EF-hand domain pair||EF-hand domain
ENSMUSG00000024401	48.7181	2.22712	4.4512	4.3814e-13	2.0748e-11	Tnf	Tumour necrosis factor, conserved site||Tumour necrosis factor alpha||Tumour necrosis factor||Tumour necrosis factor domain||Tumour necrosis factor-like domain superfamily
ENSMUSG00000024404	3496.53	2374.56	0.55826	1.3548e-10	4.8645e-09	Riok3	RIO kinase, conserved site||Serine/threonine-protein kinase Rio3||RIO kinase||Protein kinase-like domain superfamily
ENSMUSG00000024409	24.8311	4.13214	2.5872	0.00017834	0.0022759	Psors1c2	Psoriasis susceptibility 1 candidate gene 2 protein
ENSMUSG00000024411	19658.1	23672.4	-0.26808	0.0010024	0.010221	Aqp4	Major intrinsic protein||Aquaporin transporter||Major intrinsic protein, conserved site||Aquaporin-like
ENSMUSG00000024413	4570.97	5415.35	-0.24455	0.0026852	0.023614	Npc1	Protein patched/dispatched||Niemann-Pick C1, N-terminal||Sterol-sensing domain||Niemann-Pick C type protein
ENSMUSG00000024427	1156.8	502.549	1.2028	1.0114e-26	1.1931e-24	Spry4	Protein sprouty homologue 4||Sprouty
ENSMUSG00000024431	2309.59	3103.02	-0.42604	1.3426e-06	2.735e-05	Nr3c1	-||Nuclear hormone receptor, ligand-binding domain||Zinc finger, nuclear hormone receptor-type||Zinc finger, NHR/GATA-type||Nuclear hormone receptor||Glucocorticoid receptor||Nuclear hormone receptor-like domain superfamily||Armadillo-like helical
ENSMUSG00000024451	445.304	223.22	0.99633	1.8389e-10	6.4924e-09	Arap3	ARFGAP/RecO-like zinc finger||Pleckstrin homology domain||Rho GTPase-activating protein domain||PH-like domain superfamily||Arf GTPase activating protein||Sterile alpha motif domain||Ras-associating (RA) domain||Ubiquitin-like domain superfamily||Sterile alpha motif/pointed domain superfamily||Rho GTPase activation protein
ENSMUSG00000024456	2363.81	1733.41	0.4475	8.979e-07	1.8883e-05	Diaph1	Armadillo-like helical||Formin, GTPase-binding domain||Formin, protein diaphanous homologue 1||Formin, FH2 domain||Rho GTPase-binding/formin homology 3 (GBD/FH3) domain||Diaphanous autoregulatory (DAD) domain||Formin Homology 1||Armadillo-type fold||DRF autoregulatory||Formin, FH3 domain
ENSMUSG00000024485	108.23	180.764	-0.74001	0.0004013	0.0046436	Slc4a9	Band 3 cytoplasmic domain||Phosphotransferase/anion transporter||Bicarbonate transporter, eukaryotic||Sodium bicarbonate cotransporter||Bicarbonate transporter, C-terminal
ENSMUSG00000024486	2444.02	705.04	1.7935	1.37e-22	1.3029e-20	Hbegf	Epidermal growth factor receptor ligand||EGF-like domain||EGF-like, conserved site
ENSMUSG00000024491	1267.07	892.929	0.50487	1.2965e-06	2.6459e-05	Rbm27	RNA recognition motif domain||RNA-binding domain superfamily||PWI domain||Zinc finger, CCCH-type||Zinc finger, CCCH-type superfamily
ENSMUSG00000024493	2197.03	1762.11	0.31825	0.00064274	0.0069616	Lars	Rossmann-like alpha/beta/alpha sandwich fold||Aminoacyl-tRNA synthetase, class Ia||Valyl/Leucyl/Isoleucyl-tRNA synthetase, editing domain||Leucyl-tRNA synthetase, class Ia, archaeal/eukaryotic cytosolic||Aminoacyl-tRNA synthetase, class I, conserved site||Aminoacyl-tRNA synthetase, class Ia, anticodon-binding||Methionyl/Valyl/Leucyl/Isoleucyl-tRNA synthetase, anticodon-binding
ENSMUSG00000024501	6545.76	5612.69	0.22187	0.0063069	0.048041	Dpysl3	Hydantoinase/dihydropyrimidinase||Metal-dependent hydrolase, composite domain superfamily||Metal-dependent hydrolase||Amidohydrolase-related||Dihydropyrimidinase-related protein 3
ENSMUSG00000024513	2178.71	1465.52	0.57207	1.1968e-09	3.8337e-08	Mbd2	-||Methyl-CpG DNA binding||Methyl-CpG-binding domain protein 2/3, p55-binding region||DNA-binding domain superfamily||Methyl-CpG binding protein 2/3, C-terminal domain
ENSMUSG00000024516	3503.64	4611.56	-0.3964	0.0020608	0.018888	Sec11c	Peptidase S26A, signal peptidase I, serine active site||Peptidase S26B||Peptidase S24/S26A/S26B/S26C||LexA/Signal peptidase-like superfamily||-||Peptidase S26A, signal peptidase I, conserved site
ENSMUSG00000024517	340.607	241.854	0.49398	0.0012886	0.012653	Grp	Bombesin/neuromedin-B/ranatensin peptide family||Gastrin releasing peptide
ENSMUSG00000024521	263.106	93.1259	1.4984	1.941e-08	5.4044e-07	Pmaip1	Phorbol-12-myristate-13-acetate-induced protein 1||Blc2-like superfamily
ENSMUSG00000024529	977.865	156.294	2.6454	2.1775e-06	4.2226e-05	Lox	Lysyl oxidase, conserved site||Lysyl oxidase||Immunoglobulin-like fold
ENSMUSG00000024533	6215	4829.2	0.36397	8.6961e-06	0.00014986	Spire1	Zinc finger, FYVE/PHD-type||Protein Spire1||KIND domain||Zinc finger, RING/FYVE/PHD-type||Protein Spire
ENSMUSG00000024539	1013.61	415.374	1.287	4.9527e-28	6.2338e-26	Ptpn2	Protein-tyrosine phosphatase, catalytic||Protein-tyrosine phosphatase, non-receptor type-1/2||PTP type protein phosphatase||Protein-tyrosine phosphatase-like||Protein-tyrosine phosphatase, active site||Tyrosine specific protein phosphatases domain
ENSMUSG00000024576	11969.3	9516.46	0.33084	3.1159e-05	0.00047607	Csnk1a1	Serine/threonine-protein kinase, active site||Protein kinase-like domain superfamily||Protein kinase, ATP binding site||Protein kinase domain
ENSMUSG00000024589	2117.6	1619.86	0.38656	3.381e-05	0.00051149	Nedd4l	WW domain superfamily||C2 domain superfamily||C2 domain||HECT, E3 ligase catalytic domain||HECT domain||WW domain||-||E3 ubiquitin-protein ligase, SMURF1 type
ENSMUSG00000024590	741.778	409.323	0.85775	2.2553e-12	9.7647e-11	Lmnb1	Intermediate filament protein, conserved site||Lamin tail domain superfamily||Lamin tail domain||Intermediate filament protein
ENSMUSG00000024593	1745.09	2786.4	-0.6751	9.9594e-14	4.9443e-12	Megf10	Cytochrome c1, transmembrane anchor, C-terminal||Laminin EGF domain||EGF-like, conserved site||EMI domain||EGF-like domain
ENSMUSG00000024594	1057.75	844.671	0.32454	0.0017555	0.016442	Prrc1	Protein PRRC1||Inosine triphosphate pyrophosphatase-like||Non-canonical purine NTP phosphatase/PRRC1
ENSMUSG00000024597	9826.18	12120	-0.30269	0.00013059	0.0017231	Slc12a2	SLC12A transporter family||Na/K/Cl co-transporter||Na/K/Cl co-transporter 1||SLC12A transporter, C-terminal||ABC transporter type 1, transmembrane domain superfamily||Amino acid permease, N-terminal||Amino acid permease/ SLC12A domain
ENSMUSG00000024604	1300.97	1022.14	0.34799	0.0006155	0.0066966	Rbm22	RNA-binding domain superfamily||Zinc finger, CCCH-type superfamily||Zinc finger, CCCH-type||RNA recognition motif domain
ENSMUSG00000024613	1220.9	892.568	0.45191	1.2136e-05	0.00020341	Tcof1	-||Treacher Collins syndrome, treacle||LIS1 homology motif||Treacle-like, Treacher Collins Syndrome
ENSMUSG00000024620	1227.36	672.135	0.86874	4.519e-07	1.0033e-05	Pdgfrb	Tyrosine-protein kinase, active site||Immunoglobulin-like domain superfamily||Platelet-derived growth factor receptor beta||Immunoglobulin||Immunoglobulin subtype||Immunoglobulin-like fold||Immunoglobulin subtype 2||Immunoglobulin-like domain||Protein kinase-like domain superfamily||Serine-threonine/tyrosine-protein kinase, catalytic domain||Tyrosine-protein kinase, catalytic domain||Protein kina…
ENSMUSG00000024621	2380.58	3309.69	-0.47539	9.862e-05	0.0013453	Csf1r	Tyrosine-protein kinase, receptor class III, conserved site||Protein kinase domain||Tyrosine-protein kinase, catalytic domain||Protein kinase, ATP binding site||Serine-threonine/tyrosine-protein kinase, catalytic domain||Protein kinase-like domain superfamily||Immunoglobulin-like domain||Immunoglobulin-like fold||Immunoglobulin subtype 2||Immunoglobulin subtype||Macrophage colony-stimulating fact…
ENSMUSG00000024654	5844.39	8145.35	-0.47893	3.1212e-09	9.529e-08	Asrgl1	Peptidase T2, asparaginase 2||Nucleophile aminohydrolases, N-terminal||Asparaginase-like 1, metazoa
ENSMUSG00000024659	455.885	117.366	1.9577	0.0026172	0.023076	Anxa1	Annexin A1||Annexin superfamily||Annexin repeat||Annexin repeat, conserved site||Annexin
ENSMUSG00000024661	185200	125913	0.55666	5.2389e-11	1.9639e-09	Fth1	Ferritin||Ferritin/DPS protein domain||Ferritin-like superfamily||Ferritin-like diiron domain||Ferritin, conserved site||Ferritin-like
ENSMUSG00000024664	1976.87	1143.64	0.78958	1.2924e-16	8.3347e-15	Fads3	Fatty acid desaturase||Fatty acid desaturase domain||Cytochrome b5-like heme/steroid binding domain||Cytochrome b5-like heme/steroid binding domain superfamily
ENSMUSG00000024665	5271.52	6650.39	-0.33522	0.00031102	0.0037329	Fads2	Cytochrome b5-like heme/steroid binding domain||Cytochrome b5-like heme/steroid binding domain superfamily||Fatty acid desaturase domain||Fatty acid desaturase
ENSMUSG00000024675	53.42	2.62212	4.3486	1.717e-13	8.3889e-12	Ms4a4c	Membrane-spanning 4-domains subfamily A||CD20-like family
ENSMUSG00000024677	118.421	22.5529	2.3925	1.9555e-14	1.0345e-12	Ms4a6b	CD20-like family||Membrane-spanning 4-domains subfamily A||-
ENSMUSG00000024679	474.94	37.0173	3.6815	3.6063e-36	6.6001e-34	Ms4a6d	Membrane-spanning 4-domains subfamily A||CD20-like family
ENSMUSG00000024691	176.718	63.8717	1.4682	6.2611e-10	2.0927e-08	Fam111a	Peptidase S1, PA clan
ENSMUSG00000024727	84.6456	39.7038	1.0922	0.00036702	0.0043133	Trpm6	Transient receptor potential cation channel subfamily M member 6||MHCK/EF2 kinase||TRPM, tetramerisation domain superfamily||TRPM, tetramerisation domain||Ion transport domain||Protein kinase-like domain superfamily
ENSMUSG00000024730	30.8097	0.381293	6.3363	1.0103e-06	2.1051e-05	Ms4a8a	Membrane-spanning 4-domains subfamily A member 8||CD20-like family||Membrane-spanning 4-domains subfamily A
ENSMUSG00000024732	681.218	329.316	1.0486	3.4748e-16	2.1747e-14	Ccdc86	Coiled-coil domain-containing protein 86||Cgr1-like
ENSMUSG00000024736	2296.85	3747.56	-0.7063	5.3647e-05	0.00077425	Tmem132a	Transmembrane protein family 132, middle domain||Transmembrane protein TMEM132, C-terminal||Transmembrane protein 132||Transmembrane protein TMEM132, N-terminal
ENSMUSG00000024737	536.347	93.5149	2.5199	1.7169e-53	5.8716e-51	Slc15a3	Major facilitator superfamily domain||MFS transporter superfamily||PTR2 family proton/oligopeptide symporter, conserved site||Proton-dependent oligopeptide transporter family
ENSMUSG00000024754	891.893	554.672	0.68524	1.2507e-09	3.991e-08	Tmem2	Pectin lyase fold/virulence factor||G8 domain||Pectin lyase fold
ENSMUSG00000024774	8.75187	0	Inf	0.0010172	0.010343	Ankrd22	Ankyrin repeat-containing domain superfamily||Ankyrin repeat||Ankyrin repeat-containing domain
ENSMUSG00000024778	347.148	79.9277	2.1188	8.9068e-30	1.216e-27	Fas	Fas receptor, N-terminal||TNFR/NGFR cysteine-rich region||Fas receptor, death domain||Death domain||Fas receptor||-||Death-like domain superfamily
ENSMUSG00000024782	4589.6	3438.2	0.41671	6.5967e-07	1.4217e-05	Ak3	Adenylate kinase, active site lid domain||Adenylate kinase 3/4, mitochondrial||Adenylate kinase/UMP-CMP kinase||P-loop containing nucleoside triphosphate hydrolase||Adenylate kinase subfamily||Adenylate kinase, active site lid domain superfamily||Adenylate kinase, conserved site
ENSMUSG00000024785	1404.18	882.449	0.67014	3.2467e-11	1.2421e-09	Rcl1	RNA 3'-terminal phosphate cyclase/enolpyruvate transferase, alpha/beta||RNA 3'-terminal phosphate cyclase domain||RNA 3'-terminal phosphate cyclase||RNA 3'-terminal phosphate cyclase, insert domain||RNA 3'-terminal phosphate cyclase type 2||RNA 3'-terminal phosphate cyclase-like, conserved site||RNA 3'-terminal phosphate cyclase domain superfamily
ENSMUSG00000024789	2111.94	1616.29	0.38588	3.1786e-05	0.0004839	Jak2	Serine-threonine/tyrosine-protein kinase, catalytic domain||Tyrosine-protein kinase, catalytic domain||Tyrosine-protein kinase, non-receptor Jak/Tyk2||FERM/acyl-CoA-binding protein superfamily||FERM superfamily, second domain||FERM domain||SH2 domain||Band 4.1 domain||Protein kinase-like domain superfamily||Protein kinase, ATP binding site||Protein kinase domain||Tyrosine-protein kinase, non-rece…
ENSMUSG00000024805	1216.85	882.163	0.46404	1.355e-05	0.00022412	Pcgf5	Zinc finger, RING/FYVE/PHD-type||-||Zinc finger, RING-type||Zinc finger, RING-type, conserved site||RAWUL domain
ENSMUSG00000024810	13640.6	5051.27	1.4332	5.1357e-16	3.1731e-14	Il33	Interleukin-33
ENSMUSG00000024812	4293.15	3453.83	0.31384	0.00016384	0.0021159	Tjp2	SH3-like domain superfamily||Guanylate kinase-like domain||PDZ superfamily||Tight junction protein ZO-2||SH3 domain||Guanylate kinase/L-type calcium channel beta subunit||PDZ domain||Tight junction protein ZO||P-loop containing nucleoside triphosphate hydrolase||ZO-2, SH3 domain
ENSMUSG00000024816	4192.4	3211.2	0.38467	4.4912e-06	8.2374e-05	Frmd8	FERM/acyl-CoA-binding protein superfamily||Band 4.1 domain||FERM superfamily, second domain||FERM domain||PH-like domain superfamily||FERM central domain
ENSMUSG00000024824	14.1464	40.1382	-1.5045	0.0028531	0.024828	Rad9a	Rad9||Rad9/Ddc1
ENSMUSG00000024841	1451.53	1146.48	0.34037	0.00040587	0.0046917	Eif1ad	RNA-binding domain, S1, IF1 type||Nucleic acid-binding, OB-fold||Translation initiation factor 1A (eIF-1A)
ENSMUSG00000024843	2592.68	2162.93	0.26146	0.0032286	0.027635	Chka	-||Protein kinase-like domain superfamily
ENSMUSG00000024862	22096.9	27284.7	-0.30425	0.00010744	0.0014511	Klc2	-||Kinesin light chain repeat||Tetratricopeptide-like helical domain superfamily||Kinesin light chain||Tetratricopeptide repeat||Tetratricopeptide repeat-containing domain||Winged helix-like DNA-binding domain superfamily
ENSMUSG00000024869	50.9957	109.392	-1.1011	0.0012646	0.012454	Nudt8	-
ENSMUSG00000024883	173.218	42.4259	2.0296	1.728e-08	4.8473e-07	Rin1	SH2 domain superfamily||Ras and Rab interactor 1, SH2 domain||-||VPS9 domain||VPS9 domain superfamily||SH2 domain||Ras-associating (RA) domain
ENSMUSG00000024887	3068.01	3832.66	-0.32104	0.00010065	0.0013707	Asah2	Neutral/alkaline non-lysosomal ceramidase, N-terminal||Neutral/alkaline non-lysosomal ceramidase, C-terminal||Neutral/alkaline nonlysosomal ceramidase
ENSMUSG00000024892	5565.64	6937.45	-0.31786	0.00011976	0.0015983	Pcx	ATP-grasp fold, subdomain 1||Biotin carboxylation domain||Carboxylase, conserved domain||ATP-grasp fold||Biotin carboxylase, C-terminal||Single hybrid motif||Pyruvate carboxyltransferase||Carbamoyl-phosphate synthetase large subunit-like, ATP-binding domain||Biotin-binding site||Biotin/lipoyl attachment||Biotin carboxylase-like, N-terminal domain||Pre-ATP-grasp domain superfamily||Pyruvate carbox…
ENSMUSG00000024897	10833.3	13641	-0.33249	2.6674e-05	0.00041447	Apba1	PTB/PI domain||PDZ domain||PDZ superfamily||PH-like domain superfamily||Amyloid beta A4 precursor protein-binding family A member 1
ENSMUSG00000024903	98.2051	1.92395	5.6737	1.8953e-28	2.4586e-26	Lao1	Amine oxidase||FAD/NAD(P)-binding domain superfamily||Flavin amine oxidase
ENSMUSG00000024907	364.904	179.369	1.0246	2.9586e-10	1.0232e-08	Gal	Galanin message associated peptide (GMAP)||Galanin||Galanin precursor
ENSMUSG00000024912	1210.71	211.347	2.5182	5.6728e-57	2.2334e-54	Fosl1	AP-1 transcription factor||Fos-related antigen 1||Basic-leucine zipper domain
ENSMUSG00000024924	2075.65	2853.26	-0.45905	2.5043e-07	5.7878e-06	Vldlr	EGF-like calcium-binding domain||Six-bladed beta-propeller, TolB-like||EGF-like domain||Very low-density lipoprotein receptor||EGF-like, conserved site||LDLR class B repeat||LDL receptor-like superfamily||EGF-type aspartate/asparagine hydroxylation site||Low-density lipoprotein (LDL) receptor class A repeat||Low-density lipoprotein (LDL) receptor class A, conserved site||EGF-like calcium-binding,…
ENSMUSG00000024927	2608.17	1422.72	0.87439	9.7128e-22	8.793e-20	Rela	Rel homology dimerisation domain||Immunoglobulin-like fold||NF-kappa-B/Dorsal||Immunoglobulin E-set||Rel homology domain, conserved site||p53-like transcription factor, DNA-binding||NFkappaB IPT domain||Rel homology domain (RHD), DNA-binding domain superfamily||Transcription factor RelA (p65)||Rel homology domain (RHD), DNA-binding domain||IPT domain
ENSMUSG00000024937	1015.21	727.288	0.48118	6.5999e-06	0.00011633	Ehbp1l1	EEIG1/EHBP1 N-terminal domain||Calponin-like domain superfamily||Domain of unknown function DUF3585||Calponin homology domain||EH domain-binding protein 1-like protein 1
ENSMUSG00000024940	4788.96	6569.07	-0.45598	0.00025947	0.0031704	Ltbp3	EGF-type aspartate/asparagine hydroxylation site||TGF-beta binding (TB) domain superfamily||EGF-like calcium-binding, conserved site||Growth factor receptor cysteine-rich domain superfamily||TB domain||EGF-like domain||EGF-like calcium-binding domain||EGF-like, conserved site
ENSMUSG00000024944	2748.78	3230.79	-0.2331	0.0065499	0.049612	Arl2	Small GTPase superfamily, ARF type||P-loop containing nucleoside triphosphate hydrolase||Small GTPase superfamily, ARF/SAR type||Small GTP-binding protein domain
ENSMUSG00000024958	5328.54	6459.37	-0.27765	0.00075184	0.0079799	Gpr137	Integral membrane protein GPR137
ENSMUSG00000024965	329.187	201.611	0.70733	0.00016851	0.0021668	Fermt3	Band 4.1 domain||FERM/acyl-CoA-binding protein superfamily||FERM superfamily, second domain||Pleckstrin homology domain||PH-like domain superfamily||FERM central domain
ENSMUSG00000024968	385.385	642.677	-0.73779	8.1098e-09	2.359e-07	Rcor2	SANT/Myb domain||SANT domain||Homeobox-like domain superfamily||ELM2 domain
ENSMUSG00000024991	10948.1	8110.39	0.43284	5.7001e-08	1.4555e-06	Eif3a	Eukaryotic translation initiation factor 3 subunit A||Proteasome component (PCI) domain||Winged helix-like DNA-binding domain superfamily
ENSMUSG00000024998	5734.07	2278.6	1.3314	3.0111e-54	1.062e-51	Plce1	Ras-associating (RA) domain||C2 domain||1-phosphatidylinositol 4,5-bisphosphate phosphodiesterase epsilon-1||Ubiquitin-like domain superfamily||Phosphatidylinositol-specific phospholipase C, X domain||Ras guanine-nucleotide exchange factors catalytic domain||-||C2 domain superfamily||Phospholipase C, phosphatidylinositol-specific, Y domain||Phosphoinositide phospholipase C family||PLC-like phosph…
ENSMUSG00000024999	957.226	720.497	0.40987	0.00021027	0.0026378	Noc3l	Armadillo-like helical||Nucleolar complex-associated protein 3||Armadillo-type fold||Nucleolar complex-associated protein 3, N-terminal||CCAAT-binding factor
ENSMUSG00000025006	4431.67	3504.84	0.3385	6.5794e-05	0.00093013	Sorbs1	c-Cbl associated protein, SH3 domain 2||c-Cbl associated protein, SH3 domain 1||SH3 domain||Vinexin||Sorbin and SH3 domain-containing protein||-||c-Cbl associated protein, SH3 domain||SoHo domain||SH3-like domain superfamily
ENSMUSG00000025017	312.839	117.966	1.4071	6.3765e-15	3.5451e-13	Pik3ap1	DBB domain||Ankyrin repeat-containing domain superfamily
ENSMUSG00000025024	1206.08	722.33	0.7396	7.8366e-12	3.1891e-10	Smndc1	Survival motor neuron||Tudor domain
ENSMUSG00000025027	2902.14	2239.01	0.37426	2.2489e-05	0.00035481	Xpnpep1	Peptidase M24, C-terminal domain||Creatinase/Aminopeptidase P/Spt16, N-terminal||Creatinase, N-terminal||Peptidase M24||Peptidase M24B, X-Pro dipeptidase/aminopeptidase P, conserved site||-||Creatinase/aminopeptidase-like||Aminopeptidase P
ENSMUSG00000025041	3336.52	2805.15	0.25027	0.0048888	0.039336	Nt5c2	HAD-superfamily hydrolase, subfamily IG, 5'-nucleotidase||-||Purine 5'-nucleotidase||HAD superfamily||HAD-like superfamily
ENSMUSG00000025044	512.975	17.6156	4.864	1.1729e-38	2.3923e-36	Msr1	Macrophage scavenger receptor||Insect cysteine-rich antifreeze protein||SRCR domain||Collagen triple helix repeat||SRCR-like domain||SRCR-like domain superfamily
ENSMUSG00000025047	1969.18	1283.59	0.61741	3.5665e-07	8.013e-06	Pdcd11	S1 domain||Tetratricopeptide-like helical domain superfamily||HAT (Half-A-TPR) repeat||Nucleic acid-binding, OB-fold||Tetratricopeptide repeat-containing domain||Suppressor of forked||RNA-binding domain, S1
ENSMUSG00000025060	3443.27	2847.25	0.27421	0.0011935	0.011857	Slk	Serine/threonine-protein kinase, active site||Protein kinase, ATP binding site||UVR domain||Protein kinase domain||Polo kinase kinase||Protein kinase-like domain superfamily
ENSMUSG00000025068	1521.61	1053.05	0.53102	9.0329e-08	2.2454e-06	Gsto1	Glutathione S-transferase, C-terminal||Glutathione S-transferase, C-terminal-like||Glutathione S-transferase, C-terminal domain superfamily||Thioredoxin-like superfamily||Glutathione S-transferase, N-terminal||Glutathione S-transferase, omega-class
ENSMUSG00000025078	751.599	597.036	0.33215	0.0043575	0.03557	Nhlrc2	Thioredoxin-like fold||Thioredoxin domain||NHL repeat||Six-bladed beta-propeller, TolB-like||Thioredoxin-like superfamily
ENSMUSG00000025130	7747	5074.32	0.61042	1.8495e-11	7.1896e-10	P4hb	Disulphide isomerase||Thioredoxin domain||Protein disulphide isomerase||Thioredoxin, conserved site||Thioredoxin-like superfamily
ENSMUSG00000025132	15924.2	13525.7	0.23552	0.0018933	0.017535	Arhgdia	Rho protein GDP-dissociation inhibitor||Immunoglobulin E-set||Rho GDP-dissociation inhibitor domain superfamily
ENSMUSG00000025134	1460.15	1117.7	0.38559	8.8656e-05	0.0012237	Alyref	Chromatin target of PRMT1 protein, C-terminal||RNA-binding domain superfamily||RNA recognition motif domain
ENSMUSG00000025138	1521.56	1928.71	-0.34209	0.0020447	0.018766	Sirt7	Sirtuin family, catalytic core domain||DHS-like NAD/FAD-binding domain superfamily||Sirtuin family
ENSMUSG00000025139	8138.28	6830.2	0.2528	0.001564	0.014908	Tollip	C2 domain||C2 domain superfamily||Toll-interacting protein, C2 domain||UBA-like superfamily||Ubiquitin system component Cue
ENSMUSG00000025145	1343.06	2370.65	-0.81976	1.074e-16	6.963e-15	Lrrc45	-||Leucine-rich repeat
ENSMUSG00000025161	940.921	129.891	2.8568	3.8931e-20	3.2307e-18	Slc16a3	Monocarboxylate transporter 4||Monocarboxylate transporter||MFS transporter superfamily||Major facilitator superfamily||-||Major facilitator superfamily domain
ENSMUSG00000025171	960.688	707.761	0.44081	5.2643e-05	0.00076236	Ubtd1	Ubiquitin domain||Ubiquitin-binding domain||Ubiquitin-like domain superfamily||Ubiquitin
ENSMUSG00000025173	2367.9	1980.1	0.25803	0.0045658	0.03701	Wdr45b	WD40/YVTN repeat-like-containing domain superfamily||WD40 repeat||WD40-repeat-containing domain superfamily
ENSMUSG00000025175	1154.16	1525.06	-0.40202	4.0251e-05	0.00059721	Fn3k	Protein kinase-like domain superfamily||Fructosamine/Ketosamine-3-kinase
ENSMUSG00000025184	603.249	422.85	0.51261	5.6293e-05	0.00080625	R3hcc1l	RNA-binding domain superfamily||-
ENSMUSG00000025185	111.977	38.009	1.5588	2.5102e-06	4.8181e-05	Loxl4	SRCR domain||Lysyl oxidase, conserved site||Lysyl oxidase||SRCR-like domain||SRCR-like domain superfamily||Immunoglobulin-like fold
ENSMUSG00000025188	550.215	784.272	-0.51136	0.001431	0.013815	Hps1	-||Hermansky-Pudlak syndrome 1 protein
ENSMUSG00000025198	557.113	418.965	0.41114	0.0016744	0.015787	Erlin1	Band 7 domain||-||Erlin1/2||Band 7/SPFH domain superfamily
ENSMUSG00000025199	1369.22	1133.66	0.27237	0.0061662	0.047266	Chuk	Serine/threonine-protein kinase, active site||Protein kinase, ATP binding site||I-kappa-kinase-beta NEMO binding domain||Protein kinase domain||Protein kinase-like domain superfamily
ENSMUSG00000025207	1165.09	1566.62	-0.42722	1.9517e-05	0.00031214	Sema4g	Immunoglobulin-like fold||Immunoglobulin subtype||Sema domain||Immunoglobulin-like domain superfamily||WD40/YVTN repeat-like-containing domain superfamily||PSI domain||Plexin repeat||Semaphorin||-||Sema domain superfamily||Immunoglobulin-like domain
ENSMUSG00000025213	796.865	1004.51	-0.33408	0.0020952	0.019152	Kazald1	Immunoglobulin subtype||Kazal domain superfamily||Immunoglobulin-like fold||Immunoglobulin subtype 2||Kazal domain||Immunoglobulin-like domain superfamily||Insulin-like growth factor binding protein-related protein (IGFBP-rP), MAC25||Immunoglobulin-like domain||Insulin-like growth factor-binding protein, IGFBP||Immunoglobulin I-set||Growth factor receptor cysteine-rich domain superfamily
ENSMUSG00000025220	6945.66	5886.22	0.23877	0.0040026	0.033142	Mgea5	Acyl-CoA N-acyltransferase||Glycoside hydrolase superfamily||Beta-N-acetylglucosaminidase
ENSMUSG00000025225	665.926	213.832	1.6389	9.508e-15	5.2175e-13	Nfkb2	Ankyrin repeat||Rel homology dimerisation domain||Immunoglobulin-like fold||Death-like domain superfamily||Ankyrin repeat-containing domain superfamily||IPT domain||Death domain||Ankyrin repeat-containing domain||Rel homology domain (RHD), DNA-binding domain||Rel homology domain (RHD), DNA-binding domain superfamily||NFkappaB IPT domain||p53-like transcription factor, DNA-binding||Rel homology do…
ENSMUSG00000025236	1291.6	953.562	0.43777	1.7785e-05	0.00028715	Adpgk	Ribokinase-like||ADP-specific phosphofructokinase/glucokinase
ENSMUSG00000025239	1025.42	762.057	0.42825	0.00018407	0.0023412	Limd1	LIM domain-containing protein 1||Zinc finger, LIM-type
ENSMUSG00000025270	372.701	102.338	1.8647	0.0026855	0.023614	Alas2	Aminotransferase, class I/classII||Tetrapyrrole biosynthesis, 5-aminolevulinic acid synthase||5-aminolevulinate synthase presequence||Pyridoxal phosphate-dependent transferase, major region, subdomain 1||Pyridoxal phosphate-dependent transferase, subdomain 2||Pyridoxal phosphate-dependent transferase||Aminotransferase, class-II, pyridoxal-phosphate binding site
ENSMUSG00000025277	2097.65	2808.33	-0.42094	1.959e-06	3.8296e-05	Abhd6	Alpha/Beta hydrolase fold||Alpha/beta hydrolase fold-1||Epoxide hydrolase-like
ENSMUSG00000025283	2957.74	1985.42	0.57505	1.7032e-06	3.3861e-05	Sat1	GNAT domain||Acyl-CoA N-acyltransferase||Diamine acetyltransferase 1||-
ENSMUSG00000025287	832.157	621.03	0.42219	0.00024799	0.0030477	Acot9	HotDog domain superfamily||-||Hotdog acyl-CoA thioesterase (ACOT)-type domain
ENSMUSG00000025314	2740.06	1937.7	0.49986	2.2565e-08	6.1963e-07	Ptprj	Protein-tyrosine phosphatase-like||Tyrosine specific protein phosphatases domain||PTP type protein phosphatase||Cytochrome c1, transmembrane anchor, C-terminal||Protein-tyrosine phosphatase, active site||Fibronectin type III superfamily||Immunoglobulin-like fold||Protein-tyrosine phosphatase, catalytic||Fibronectin type III
ENSMUSG00000025316	698.89	408.379	0.77516	1.3634e-06	2.7707e-05	Banp	BEN domain||-
ENSMUSG00000025321	6243.09	5114.86	0.28757	0.00045625	0.0051826	Itgb8	EGF-like, conserved site||Integrin beta N-terminal||Integrin beta subunit, VWA domain||Integrin beta subunit||Integrin beta-8 subunit||EGF-like domain, extracellular||PSI domain||von Willebrand factor A-like domain superfamily||Integrin domain superfamily
ENSMUSG00000025324	680.483	310.054	1.134	1.2256e-15	7.3577e-14	Atp10a	P-type ATPase, transmembrane domain superfamily||Probable phospholipid-transporting ATPase VA||P-type ATPase, cytoplasmic domain N||P-type ATPase, C-terminal||P-type ATPase, N-terminal||P-type ATPase, phosphorylation site||P-type ATPase, A domain superfamily||P-type ATPase||P-type ATPase, subfamily IV||HAD-like superfamily
ENSMUSG00000025332	3840.93	2881.4	0.41469	1.038e-06	2.1574e-05	Kdm5c	JmjN domain||ARID DNA-binding domain||Zinc finger, RING/FYVE/PHD-type||JmjC domain||Zinc finger, C5HC2-type||-||Zinc finger, PHD-finger||Zinc finger, PHD-type, conserved site||Zinc finger, FYVE/PHD-type||ARID DNA-binding domain superfamily||Zinc finger, PHD-type||Lysine-specific demethylase-like domain
ENSMUSG00000025337	4663.5	3724.25	0.32446	0.00042953	0.0049248	Sbds	Ribosome maturation protein SBDS, C-terminal||-||Ribosome maturation protein SBDS, N-terminal domain superfamily||Ribosome maturation protein SBDS, conserved site||Ribosome maturation protein Sdo1/SBDS||Ribosome maturation protein SBDS, N-terminal||Ribosome maturation protein Sdo1/SBDS, central domain superfamily
ENSMUSG00000025350	372.235	512.012	-0.45996	0.0004431	0.0050599	Rdh5	-||Short-chain dehydrogenase/reductase SDR||NAD(P)-binding domain superfamily
ENSMUSG00000025351	10719.8	5203.72	1.0427	1.3857e-25	1.5692e-23	Cd63	Tetraspanin, conserved site||Tetraspanin||Tetraspanin, EC2 domain superfamily||Tetraspanin/Peripherin
ENSMUSG00000025355	720.173	83.3512	3.1111	1.6186e-06	3.2312e-05	Mmp19	Hemopexin-like domain superfamily||Matrix metalloproteinase-19||Hemopexin-like domain||Peptidase, metallopeptidase||Peptidase M10, metallopeptidase||Hemopexin, conserved site||PGBD-like superfamily||Peptidase M10A||Hemopexin-like repeats||Peptidase M10A, catalytic domain||Metallopeptidase, catalytic domain superfamily||Peptidoglycan binding-like
ENSMUSG00000025357	607.185	468.331	0.37461	0.0027193	0.023853	Dgka	EF-hand domain||Inorganic polyphosphate/ATP-NAD kinase, N-terminal||NAD kinase/diacylglycerol kinase-like domain superfamily||-||Diacylglycerol kinase, accessory domain||Diacylglycerol kinase type I, N-terminal||Diacylglycerol kinase, catalytic domain||Protein kinase C-like, phorbol ester/diacylglycerol-binding domain||EF-hand domain pair||EF-Hand 1, calcium-binding site
ENSMUSG00000025362	6787.76	5301.5	0.35653	0.0011619	0.011594	Rps26	Ribosomal protein S26e
ENSMUSG00000025364	2732.12	1705.93	0.67946	4.1878e-14	2.1516e-12	Pa2g4	Peptidase M24||Creatinase/aminopeptidase-like||Winged helix DNA-binding domain superfamily||PA2G4 family||Peptidase M24A, methionine aminopeptidase, subfamily 2, binding site
ENSMUSG00000025369	14389.3	16945	-0.23586	0.0027594	0.024154	Smarcc2	BRCT domain superfamily||SANT/Myb domain||Winged helix-like DNA-binding domain superfamily||SMARCC, SWIRM-associated domain||SWIRM domain||Chromo/chromo shadow domain||SMARCC, C-terminal||SMARCC, N-terminal||Homeobox-like domain superfamily||SANT domain
ENSMUSG00000025372	2145.34	1306.2	0.71583	1.9526e-14	1.0345e-12	Baiap2	IRSp53, SH3 domain||AH/BAR domain superfamily||SH3-like domain superfamily||SH3 domain||I-BAR domain containing protein IRSp53/IRTKS/Pinkbar||I-BAR domain containing protein IRSp53||IMD/I-BAR domain
ENSMUSG00000025402	546.611	353.56	0.62856	3.3892e-05	0.00051229	Nab2	Nab, N-terminal||NAB co-repressor, domain||Sterile alpha motif/pointed domain superfamily
ENSMUSG00000025407	148.391	395.777	-1.4153	3.1263e-08	8.3609e-07	Gli1	Zinc finger, RING/FYVE/PHD-type||Zinc finger C2H2-type||Zinc finger protein GLI1||Zinc finger C2H2 superfamily
ENSMUSG00000025408	1078.75	766.278	0.49343	3.2417e-06	6.1249e-05	Ddit3	DNA damage-inducible transcript 3||Basic-leucine zipper domain
ENSMUSG00000025413	1396.23	1778.17	-0.34886	0.00026121	0.0031893	Ttc4	Tetratricopeptide-like helical domain superfamily||Tetratricopeptide repeat||Tetratricopeptide repeat-containing domain
ENSMUSG00000025429	266.074	87.5132	1.6043	0.00076475	0.0080795	Pstpip2	Proline-serine-threonine phosphatase-interacting protein 2||FCH domain||AH/BAR domain superfamily||F-BAR domain
ENSMUSG00000025437	3269.59	4063.87	-0.31374	0.00020827	0.0026136	Usp33	Zinc finger, UBP-type||Ubiquitin specific protease, conserved site||-||Zinc finger, RING/FYVE/PHD-type||DUSP-like superfamily||Peptidase C19, ubiquitin-specific peptidase, DUSP domain||Ubiquitin specific protease domain||Peptidase C19, ubiquitin carboxyl-terminal hydrolase
ENSMUSG00000025473	1533.09	116.227	3.7214	1.2741e-148	3.595e-145	Adam8	-||Disintegrin, conserved site||Peptidase M12B, propeptide||Metallopeptidase, catalytic domain superfamily||ADAM, cysteine-rich||EGF-like, conserved site||Disintegrin domain||Reprolysin domain, adamalysin-type||Disintegrin domain superfamily||EGF-like domain||Peptidase M12B, ADAM/reprolysin
ENSMUSG00000025477	2940.27	2299.34	0.35473	5.4356e-05	0.00078315	Inpp5a	Endonuclease/exonuclease/phosphatase superfamily||Inositol polyphosphate-related phosphatase||Endonuclease/exonuclease/phosphatase
ENSMUSG00000025484	720.126	579.038	0.31459	0.0064821	0.049208	Bet1l	-||Target SNARE coiled-coil homology domain
ENSMUSG00000025486	1956.96	2401.87	-0.29555	0.0010515	0.010653	Sirt3	Sirtuin family||Sirtuin, class I||DHS-like NAD/FAD-binding domain superfamily||Sirtuin family, catalytic core domain||-
ENSMUSG00000025491	690.247	145.031	2.2508	1.7074e-15	1.0071e-13	Ifitm1	CD225/Dispanin family
ENSMUSG00000025492	3066.73	771.904	1.9902	8.2048e-14	4.1216e-12	Ifitm3	CD225/Dispanin family
ENSMUSG00000025494	78.7179	34.3473	1.1965	0.00017732	0.0022639	Sigirr	Immunoglobulin-like domain superfamily||Immunoglobulin-like domain||Toll/interleukin-1 receptor homology (TIR) domain||-||Interleukin-1 receptor family||Toll/interleukin-1 receptor homology (TIR) domain superfamily||Immunoglobulin-like fold
ENSMUSG00000025498	306.758	77.0399	1.9934	2.8429e-25	3.1354e-23	Irf7	SMAD/FHA domain superfamily||Interferon regulatory factor DNA-binding domain||Interferon regulatory factor, conserved site||Interferon regulatory factor-3||-||Winged helix DNA-binding domain superfamily||SMAD-like domain superfamily||Winged helix-like DNA-binding domain superfamily
ENSMUSG00000025505	1178.69	1545.75	-0.39112	6.7725e-05	0.00095385	Tmem80	Uncharacterised protein family, transmembrane-17
ENSMUSG00000025508	4597.44	2965.19	0.63271	5.2837e-14	2.6861e-12	Rplp2	Ribosomal protein L12 family
ENSMUSG00000025509	4113.92	1638.6	1.328	2.6337e-12	1.1273e-10	Pnpla2	Patatin-like phospholipase domain-containing protein 2||-||Patatin-like phospholipase domain-containing protein||Acyl transferase/acyl hydrolase/lysophospholipase||Patatin-like phospholipase domain
ENSMUSG00000025510	3180.96	2207.37	0.52713	0.00076366	0.0080725	Cd151	Tetraspanin/Peripherin||Tetraspanin, EC2 domain superfamily||Tetraspanin||Tetraspanin, conserved site
ENSMUSG00000025511	2331.73	671.642	1.7956	3.8755e-49	1.151e-46	Tspan4	Tetraspanin/Peripherin||Tetraspanin, EC2 domain superfamily||-||Tetraspanin, conserved site||Tetraspanin
ENSMUSG00000025537	833.476	1141.45	-0.45365	1.9232e-05	0.00030806	Phkg1	Protein kinase, ATP binding site||Protein kinase domain||Protein kinase-like domain superfamily||Serine/threonine-protein kinase, active site||Phosphorylase kinase, gamma catalytic subunit
ENSMUSG00000025544	3893.91	3199.95	0.28317	0.00096046	0.0098216	Tm9sf2	-||Nonaspanin (TM9SF)
ENSMUSG00000025572	500.081	689.785	-0.46398	0.00013573	0.0017847	Tmc6	TMC||-
ENSMUSG00000025578	340.886	465.725	-0.45019	0.0055422	0.043477	Cbx8	Chromo-like domain superfamily||Chromo/chromo shadow domain||Chromo domain||CBX family C-terminal motif||Chromo domain, conserved site
ENSMUSG00000025580	2893.49	2348.36	0.30115	0.00052205	0.0058086	Eif4a3	P-loop containing nucleoside triphosphate hydrolase||RNA helicase, DEAD-box type, Q motif||DEAD/DEAH box helicase domain||Helicase, C-terminal||Helicase superfamily 1/2, ATP-binding domain||ATP-dependent RNA helicase DEAD-box, conserved site
ENSMUSG00000025584	1326.67	2063.88	-0.63756	1.699e-11	6.6351e-10	Pde8a	3'5'-cyclic nucleotide phosphodiesterase, catalytic domain superfamily||3'5'-cyclic nucleotide phosphodiesterase, catalytic domain||3'5'-cyclic nucleotide phosphodiesterase, conserved site||PAS domain superfamily||3'5'-cyclic nucleotide phosphodiesterase||PAS domain||HD/PDEase domain
ENSMUSG00000025591	2046.74	579.22	1.8211	6.9108e-18	4.7752e-16	Tma16	-||Translation machinery-associated protein 16
ENSMUSG00000025597	1360.04	2021.85	-0.57203	5.3376e-05	0.00077067	Klhl4	Kelch-type beta propeller||SKP1/BTB/POZ domain superfamily||BTB/Kelch-associated||BTB-kelch protein||Kelch repeat type 1||BTB/POZ domain
ENSMUSG00000025608	2776.92	504.544	2.4604	2.0711e-14	1.0906e-12	Podxl	Podocalyxin||CD34/Podocalyxin
ENSMUSG00000025609	4742.59	3961.35	0.25968	0.002517	0.02238	Mkln1	Galactose oxidase/kelch, beta-propeller||Kelch repeat type 1||Galactose oxidase, beta-propeller||Galactose-binding-like domain superfamily||Muskelin, N-terminal||Kelch-type beta propeller||CTLH, C-terminal LisH motif||LIS1 homology motif
ENSMUSG00000025610	43.3221	9.17554	2.2392	1.3339e-05	0.00022116	Map3k7cl	-
ENSMUSG00000025612	2111.99	955.893	1.1437	1.2965e-31	1.9085e-29	Bach1	Basic leucine zipper domain, Maf-type||BTB/POZ domain||Basic-leucine zipper domain||SKP1/BTB/POZ domain superfamily||Transcription factor, Skn-1-like, DNA-binding domain superfamily
ENSMUSG00000025613	9432.25	8049.21	0.22875	0.0057675	0.044778	Cct8	Chaperonin TCP-1, conserved site||Chaperonin Cpn60/TCP-1 domain superfamily||T-complex protein 1, theta subunit||GroEL-like equatorial domain superfamily||-||Chaperone tailless complex polypeptide 1 (TCP-1)||Chaperonin Cpn60/TCP-1 family||GroEL-like apical domain superfamily
ENSMUSG00000025647	2404.14	1735.72	0.46999	2.1962e-07	5.1352e-06	Shisa5	Shisa family
ENSMUSG00000025648	1578.16	743.229	1.0864	4.0456e-17	2.6806e-15	Pfkfb4	Phosphoglycerate/bisphosphoglycerate mutase, active site||6-phosphofructo-2-kinase||Histidine phosphatase superfamily||P-loop containing nucleoside triphosphate hydrolase||-||Histidine phosphatase superfamily, clade-1||Fructose-2,6-bisphosphatase
ENSMUSG00000025724	1084.03	787.494	0.46107	0.00020745	0.0026053	Sec11a	Peptidase S26A, signal peptidase I, conserved site||Peptidase S26A, signal peptidase I, serine active site||Peptidase S26B||LexA/Signal peptidase-like superfamily||Peptidase S24/S26A/S26B/S26C
ENSMUSG00000025727	42.6821	119.811	-1.4891	4.6868e-06	8.573e-05	A930017K11Rik	-
ENSMUSG00000025728	3626.62	4612.83	-0.34703	3.1177e-05	0.00047614	Pigq	-||N-acetylglucosaminyl transferase component
ENSMUSG00000025737	1151.61	1470.75	-0.35291	0.00046024	0.0052221	Wdr24	WD40 repeat||WD40 repeat, conserved site||WD40-repeat-containing domain superfamily||WD40/YVTN repeat-like-containing domain superfamily||WD40-repeat-containing domain||GATOR complex protein WDR24
ENSMUSG00000025746	353.245	1.46454	7.9141	4.4848e-108	5.8402e-105	Il6	Interleukin-6/GCSF/MGF||Interleukin-6||Interleukin-6/GCSF/MGF, conserved site||Four-helical cytokine-like, core
ENSMUSG00000025757	1066.23	411.578	1.3733	0.00062583	0.006798	Hspa4l	Heat shock protein 70kD, peptide-binding domain superfamily||Heat shock protein 70, conserved site||Heat shock protein 70 family||Heat shock protein 70kD, C-terminal domain superfamily
ENSMUSG00000025792	1221.08	1680.67	-0.46087	2.7482e-06	5.254e-05	Slc25a10	Mitochondrial substrate/solute carrier||Mitochondrial carrier UCP-like||Mitochondrial carrier domain superfamily
ENSMUSG00000025804	385.715	16.1543	4.5775	1.8014e-27	2.2099e-25	Ccr1	CC chemokine receptor 1||C-C Chemokine receptor type 1, eukaryote||G protein-coupled receptor, rhodopsin-like||Chemokine receptor family||GPCR, rhodopsin-like, 7TM
ENSMUSG00000025809	6067.11	4135.87	0.55282	1.4461e-07	3.4823e-06	Itgb1	Cytochrome c1, transmembrane anchor, C-terminal||Integrin beta subunit||Integrin beta subunit, VWA domain||Integrin beta N-terminal||von Willebrand factor A-like domain superfamily||Integrin domain superfamily||-||Integrin beta tail domain superfamily||Integrin beta-1 subunit||Integrin beta subunit, cytoplasmic domain superfamily||EGF-like domain, extracellular||Integrin beta subunit, tail||PSI d…
ENSMUSG00000025823	1974.84	1470.01	0.42591	6.523e-06	0.00011533	Pdia4	Thioredoxin domain||Disulphide isomerase||Thioredoxin, conserved site||Protein disulphide isomerase||Protein disulphide-isomerase A4||Thioredoxin-like superfamily
ENSMUSG00000025854	2535.9	3153.4	-0.31441	0.00041932	0.0048224	Fam20c	-||FAM20, C-terminal||FAM20
ENSMUSG00000025856	3219.73	2014.81	0.6763	2.0944e-14	1.1011e-12	Pdgfa	PDGF/VEGF domain||Platelet-derived growth factor, conserved site||Cystine-knot cytokine||Platelet-derived growth factor, N-terminal
ENSMUSG00000025869	1202.15	689.389	0.80223	1.3352e-13	6.5424e-12	Nop16	-||Ribosome biogenesis protein Nop16
ENSMUSG00000025877	162.828	78.0141	1.0615	0.0015931	0.015134	Hk3	Hexokinase||Hexokinase, binding site||-||Hexokinase, N-terminal||Hexokinase, C-terminal
ENSMUSG00000025887	224.99	102.179	1.1388	6.4847e-06	0.00011477	Casp12	Death-like domain superfamily||Peptidase family C14A, His active site||Peptidase family C14A, cysteine active site||Caspase-12||Caspase-like domain superfamily||Peptidase C14A, caspase catalytic domain||Peptidase C14, caspase non-catalytic subunit p10||CARD domain||-||Peptidase C14, p20 domain
ENSMUSG00000025888	177.582	92.2524	0.94483	1.9495e-05	0.00031194	Casp1	CARD domain||Peptidase C14, caspase non-catalytic subunit p10||Peptidase C14A, caspase catalytic domain||Caspase-like domain superfamily||Peptidase C14, p20 domain||Peptidase family C14A, His active site||Death-like domain superfamily||Peptidase family C14A, cysteine active site
ENSMUSG00000025892	6397.01	7708	-0.26896	0.00060331	0.0065893	Gria4	Periplasmic binding protein-like I||Ionotropic glutamate receptor, metazoa||Ionotropic glutamate receptor||Receptor, ligand binding region||Ionotropic glutamate receptor, L-glutamate and glycine-binding domain
ENSMUSG00000025894	1009.22	800.103	0.33498	0.002404	0.021573	Aasdhppt	4'-phosphopantetheinyl transferase domain||-||4'-phosphopantetheinyl transferase domain superfamily
ENSMUSG00000025915	3278.75	609.166	2.4282	1.1849e-32	1.8319e-30	Sgk3	-||Protein kinase, ATP binding site||Protein kinase domain||Protein kinase-like domain superfamily||Protein kinase, C-terminal||PX domain superfamily||AGC-kinase, C-terminal||Phox homologous domain||Serine/threonine-protein kinase, active site
ENSMUSG00000025921	1452.09	435.919	1.736	2.4601e-07	5.6973e-06	Rdh10	Retinol dehydrogenase 10||Short-chain dehydrogenase/reductase, conserved site||Short-chain dehydrogenase/reductase SDR||NAD(P)-binding domain superfamily
ENSMUSG00000025934	44.4965	80.4666	-0.8547	0.0055844	0.043727	Gsta3	Glutathione S-transferase, alpha class||Glutathione S-transferase, C-terminal domain superfamily||Glutathione S-transferase, C-terminal||Glutathione S-transferase, C-terminal-like||Glutathione S-transferase, N-terminal||Thioredoxin-like superfamily
ENSMUSG00000025935	1430.06	1087.6	0.39492	0.00079309	0.0083626	Tram1	Translocation associated membrane protein||TRAM1-like protein||TRAM/LAG1/CLN8 homology domain||-
ENSMUSG00000025937	1063.41	835.43	0.34811	0.0016322	0.015463	Lactb2	Metallo-beta-lactamase||Metallo-hydrolase/oxidoreductase superfamily||Winged helix-like DNA-binding domain superfamily
ENSMUSG00000025958	1946.24	1575.32	0.30504	0.0013563	0.013195	Creb1	Coactivator CBP, pKID||cAMP response element binding (CREB) protein||cAMP-responsive element-binding protein 1||-||Basic-leucine zipper domain||Transcription factor, Skn-1-like, DNA-binding domain superfamily
ENSMUSG00000025967	5728.97	4759.63	0.26743	0.0047711	0.038554	Eef1b2	Elongation factor 1 beta central acidic region, eukaryote||-||Translation elongation factor EF1B, beta/delta subunit, guanine nucleotide exchange domain||Glutathione S-transferase, C-terminal domain superfamily||Translation elongation factor eEF-1beta-like superfamily||Translation elongation factor EF1B, beta/delta chains, conserved site||Translation elongation factor EF1B/ribosomal protein S6
ENSMUSG00000025980	8939.95	7134.25	0.32551	5.5142e-05	0.00079244	Hspd1	Chaperonin Cpn60, conserved site||Chaperonin Cpn60/TCP-1 family||GroEL-like apical domain superfamily||Chaperone tailless complex polypeptide 1 (TCP-1)||TCP-1-like chaperonin intermediate domain superfamily||Chaperonin Cpn60||GroEL-like equatorial domain superfamily||Chaperonin Cpn60/TCP-1 domain superfamily
ENSMUSG00000025981	934.695	576.627	0.69686	7.4113e-10	2.4601e-08	Coq10b	START-like domain superfamily||Coenzyme Q-binding protein COQ10, START domain
ENSMUSG00000025993	203.484	318.053	-0.64436	0.00017433	0.0022282	Slc40a1	MFS transporter superfamily||Ferroporti-1
ENSMUSG00000025997	375.104	177.21	1.0818	5.6971e-07	1.2429e-05	Ikzf2	Zinc finger, RING/FYVE/PHD-type||Zinc finger C2H2-type||-||Zinc finger C2H2 superfamily||At2g23090-like
ENSMUSG00000026020	2446.53	1381.89	0.8241	9.3741e-19	7.0063e-17	Nop58	Nop domain superfamily||NOP5, N-terminal||-||NOSIC||Nop domain
ENSMUSG00000026029	234.215	70.5589	1.7309	1.1404e-14	6.2279e-13	Casp8	Peptidase C14A, caspase catalytic domain||Caspase-like domain superfamily||Peptidase C14, caspase non-catalytic subunit p10||Caspase-8||Peptidase C14, p20 domain||Death-like domain superfamily||Peptidase family C14A, His active site||Peptidase family C14A, cysteine active site||Death effector domain
ENSMUSG00000026031	1661.21	790.384	1.0716	2.9888e-15	1.7181e-13	Cflar	Peptidase C14, p20 domain||Death effector domain||Peptidase C14A, caspase catalytic domain||Caspase-like domain superfamily||Death-like domain superfamily
ENSMUSG00000026037	919.36	637.535	0.52812	1.6177e-06	3.2312e-05	Orc2	Origin recognition complex, subunit 2||-
ENSMUSG00000026064	1849.92	1508.18	0.29465	0.0019994	0.018371	Ptp4a1	Protein-tyrosine phosphatase, catalytic||Protein-tyrosine phosphatase-like||-||Dual specificity phosphatase, catalytic domain||Tyrosine specific protein phosphatases domain
ENSMUSG00000026068	128.024	4.38838	4.8666	7.1368e-12	2.9148e-10	Il18rap	Immunoglobulin||Interleukin-1 receptor family||Interleukin-1 receptor type I/II||Immunoglobulin-like domain superfamily||Immunoglobulin-like fold||Immunoglobulin subtype||Toll/interleukin-1 receptor homology (TIR) domain||Immunoglobulin-like domain||Toll/interleukin-1 receptor homology (TIR) domain superfamily
ENSMUSG00000026069	24.0052	7.12798	1.7518	0.0058204	0.045106	Il1rl1	Toll/interleukin-1 receptor homology (TIR) domain superfamily||Immunoglobulin-like domain||Toll/interleukin-1 receptor homology (TIR) domain||Immunoglobulin subtype||Immunoglobulin-like fold||Immunoglobulin subtype 2||Immunoglobulin-like domain superfamily||Interleukin-1 receptor family||Interleukin-1 receptor type I/II
ENSMUSG00000026072	1368.37	151.919	3.1711	4.9773e-83	3.3704e-80	Il1r1	Immunoglobulin-like fold||Immunoglobulin subtype||Interleukin-1 receptor type I/II||Interleukin-1 receptor family||Immunoglobulin-like domain superfamily||Interleukin-1 receptor type 1||Toll/interleukin-1 receptor homology (TIR) domain superfamily||Toll/interleukin-1 receptor homology (TIR) domain||Immunoglobulin-like domain||Immunoglobulin I-set
ENSMUSG00000026073	335.89	19.9057	4.0767	1.9066e-14	1.0134e-12	Il1r2	Interleukin-1 receptor type I/II||Immunoglobulin||Interleukin-1 receptor family||Immunoglobulin-like domain superfamily||Immunoglobulin subtype 2||Immunoglobulin-like fold||Interleukin-1 receptor type II||Immunoglobulin subtype||-||Immunoglobulin-like domain
ENSMUSG00000026083	3710.37	2703.19	0.4569	1.7399e-07	4.1282e-06	Eif5b	P-loop containing nucleoside triphosphate hydrolase||Small GTP-binding protein domain||Translation initiation factor IF-2, domain 3 superfamily||Translation elongation factor EFTu-like, domain 2||Translation protein, beta-barrel domain superfamily||Translation initiation factor IF- 2||Transcription factor, GTP-binding domain||Translation initiation factor IF- 2, domain 3
ENSMUSG00000026088	364.098	259.613	0.48796	0.0011339	0.011365	Mitd1	MIT||MIT, C-terminal phospholipase D-like domain||MIT domain superfamily
ENSMUSG00000026094	337.631	186.71	0.85465	0.0020578	0.018869	Stk17b	Serine/threonine-protein kinase, active site||Protein kinase, ATP binding site||Protein kinase domain||Protein kinase-like domain superfamily
ENSMUSG00000026104	703.218	454.596	0.62939	5.7507e-07	1.2529e-05	Stat1	-||p53-like transcription factor, DNA-binding||STAT transcription factor, coiled coil||STAT transcription factor, N-terminal domain superfamily||Signal transducer and activation of transcription 1, TAZ2 binding domain, C-terminal||Transcription factor STAT||SH2 domain superfamily||STAT transcription factor, DNA-binding, N-terminal||STAT transcription factor, protein interaction||STAT1, SH2 domain…
ENSMUSG00000026107	539.107	350.72	0.62025	3.0379e-06	5.7624e-05	Nabp1	-||Nucleic acid-binding, OB-fold
ENSMUSG00000026109	3209.64	4672.37	-0.54174	1.1428e-10	4.1561e-09	Tmeff2	EGF-like domain||EGF-like, conserved site||Kazal domain superfamily||Kazal domain
ENSMUSG00000026121	1648.83	929.987	0.82616	1.9978e-08	5.5307e-07	Sema4c	Immunoglobulin-like domain||Semaphorin||-||Sema domain superfamily||PSI domain||Plexin repeat||WD40/YVTN repeat-like-containing domain superfamily||Immunoglobulin-like domain superfamily||Immunoglobulin subtype||Sema domain||Immunoglobulin-like fold
ENSMUSG00000026127	2010.46	1305.24	0.62321	4.9167e-11	1.8476e-09	Imp4	Anticodon-binding domain superfamily||Brix domain||-
ENSMUSG00000026141	231.621	408.362	-0.81808	4.8266e-08	1.2503e-06	Col19a1	Concanavalin A-like lectin/glucanase domain superfamily||Collagen triple helix repeat||Insect cysteine-rich antifreeze protein||Laminin G domain
ENSMUSG00000026159	3836.61	3218.12	0.25361	0.0028348	0.024706	Agfg1	ARFGAP/RecO-like zinc finger||Arf GTPase activating protein
ENSMUSG00000026170	1203.07	2162.47	-0.84596	1.1257e-11	4.4944e-10	Cyp27a1	Cytochrome P450, E-class, group I||Cytochrome P450||Cytochrome P450 superfamily||Cytochrome P450, conserved site
ENSMUSG00000026174	993.019	787.105	0.33527	0.0018916	0.017528	Cnot9	CCR4-NOT transcription complex subunit 9||Armadillo-type fold||Armadillo-like helical
ENSMUSG00000026177	451.911	102.28	2.1435	5.1645e-37	9.8791e-35	Slc11a1	NRAMP family
ENSMUSG00000026180	380.707	3.24071	6.8762	5.4575e-18	3.7942e-16	Cxcr2	GPCR, rhodopsin-like, 7TM||CXC chemokine receptor 1/2||CXC chemokine receptor 2||G protein-coupled receptor, rhodopsin-like
ENSMUSG00000026192	2182.98	1675.59	0.38163	3.5893e-05	0.00053893	Atic	AICAR transformylase, duplicated domain superfamily||Methylglyoxal synthase-like domain||AICARFT/IMPCHase bienzyme||Cytidine deaminase-like||Methylglyoxal synthase-like domain superfamily
ENSMUSG00000026193	6258.6	1871.25	1.7418	8.1567e-05	0.0011328	Fn1	Fibronectin type III superfamily||Fibronectin type III||Immunoglobulin-like fold||Fibronectin, type I||Kringle-like fold||Fibronectin type II domain||-||Fibronectin type II domain superfamily
ENSMUSG00000026199	601.33	775.22	-0.36645	0.0014487	0.013955	Ankzf1	Ankyrin repeat-containing domain superfamily||-||Ankyrin repeat||Ankyrin repeat-containing domain||Zinc finger C2H2-type
ENSMUSG00000026200	248.944	336.092	-0.43303	0.0058835	0.045501	Glb1l	Glycoside hydrolase 35, catalytic domain||Beta-galactosidase 1-like||Glycoside hydrolase superfamily||Galactose-binding-like domain superfamily||-||Glycoside hydrolase, family 35
ENSMUSG00000026202	16145.2	19037.4	-0.23773	0.0019298	0.017804	Tuba4a	Tubulin/FtsZ, C-terminal||Tubulin/FtsZ, GTPase domain||Tubulin/FtsZ, 2-layer sandwich domain||Alpha tubulin||Tubulin/FtsZ, GTPase domain superfamily||Tubulin, conserved site||Tubulin||Tubulin/FtsZ, C-terminal domain superfamily
ENSMUSG00000026203	8219.48	10697.4	-0.38014	2.2042e-06	4.2694e-05	Dnajb2	DnaJ domain||-||DnaJ domain, conserved site||DnaJ domain superfamily||Ubiquitin interacting motif
ENSMUSG00000026207	2978.87	4034.96	-0.43779	0.00090942	0.0093719	Speg	Immunoglobulin-like domain superfamily||Fibronectin type III superfamily||Fibronectin type III||Immunoglobulin subtype||Immunoglobulin subtype 2||Immunoglobulin-like fold||Serine/threonine-protein kinase, active site||Serine/threonine protein kinase, striated muscle-specific||Protein kinase-like domain superfamily||Immunoglobulin I-set||Immunoglobulin-like domain||Protein kinase domain||Protein k…
ENSMUSG00000026208	188.703	50.845	1.8919	1.1124e-13	5.5065e-12	Des	Intermediate filament head, DNA-binding domain||Intermediate filament protein||Desmin||Intermediate filament protein, conserved site
ENSMUSG00000026222	183.561	85.7844	1.0975	5.7476e-05	0.00082111	Sp100	Bromodomain-like superfamily||Bromodomain||Zinc finger, PHD-finger||Zinc finger, FYVE/PHD-type||Zinc finger, RING/FYVE/PHD-type||HSR domain||SAND domain||Transcription intermediary factor 1-beta||-||SAND-like domain superfamily
ENSMUSG00000026227	318.181	448.623	-0.49566	0.00055393	0.0061231	2810459M11Rik	Protein of unknown function DUF4630
ENSMUSG00000026234	17210	11603.8	0.56864	4.5228e-13	2.1387e-11	Ncl	RNA recognition motif domain||Nucleolin, RNA recognition motif 3||Nucleolin, RNA recognition motif 4||Nucleolin, RNA recognition motif 1||RNA-binding domain superfamily||-||Nucleolin, RNA recognition motif 2
ENSMUSG00000026235	1218.04	1633.95	-0.4238	1.1327e-05	0.00019118	Epha4	Tyrosine-protein kinase, catalytic domain||-||Serine-threonine/tyrosine-protein kinase, catalytic domain||Galactose-binding-like domain superfamily||Tyrosine-protein kinase ephrin type A/B receptor-like||Ephrin receptor type-A /type-B||Ephrin receptor, transmembrane domain||Ephrin type-A receptor 4, ligand binding domain||Immunoglobulin-like fold||Fibronectin type III||Protein kinase domain||Tyro…
ENSMUSG00000026239	2141.95	2648.83	-0.30643	0.0062266	0.047611	Pde6d	-||Immunoglobulin E-set||GMP phosphodiesterase, delta subunit||GMP phosphodiesterase, delta subunit superfamily||Retinal rod rhodopsin-sensitive cGMP 3', 5'-cyclic phosphodiesterase, delta subunit
ENSMUSG00000026254	2392.86	1998.5	0.25982	0.0040725	0.033615	Eif4e2	Translation Initiation factor eIF- 4e||Translation Initiation factor eIF- 4e-like||Eukaryotic translation initiation factor 4E (eIF-4E), conserved site
ENSMUSG00000026271	235.185	29.4119	2.9993	3.1289e-34	5.2186e-32	Gpr35	G protein-coupled receptor, rhodopsin-like||-||GPCR, rhodopsin-like, 7TM
ENSMUSG00000026288	523.602	398.857	0.3926	0.0032997	0.028184	Inpp5d	Endonuclease/exonuclease/phosphatase superfamily||SH2 domain superfamily||Endonuclease/exonuclease/phosphatase||Inositol polyphosphate-related phosphatase||-||SH2 domain
ENSMUSG00000026305	2494.78	2108.57	0.24265	0.0054992	0.04321	Lrrfip1	Leucine-rich repeat flightless-interacting protein 1/2
ENSMUSG00000026313	2105.16	1766.47	0.25306	0.0058246	0.045128	Hdac4	Histone deacetylase class II, eukaryotic||Histone deacetylase superfamily||Ureohydrolase domain superfamily||Histone deacetylase 4||Histone deacetylase, glutamine rich N-terminal domain||Histone deacetylase domain||Histone deacetylase domain superfamily
ENSMUSG00000026315	72.6693	15.9123	2.1912	1.792e-08	5.0143e-07	Serpinb8	Serpin superfamily||Serpin domain||Serpin family||Serpin B9/maspin||-||Serpin, conserved site
ENSMUSG00000026317	2237.74	1840.84	0.28168	0.0014071	0.013608	Cln8	-||TRAM/LAG1/CLN8 homology domain
ENSMUSG00000026341	7200.82	5926.64	0.28095	0.00063325	0.0068697	Actr3	-||Actin/actin-like conserved site||Actin-related protein 3||Actin family
ENSMUSG00000026342	872.153	611.292	0.51272	6.007e-06	0.00010721	Slc35f5	-||EamA domain
ENSMUSG00000026353	4864.96	3746.78	0.37678	7.4372e-06	0.0001298	Ubxn4	Ubiquitin-like domain superfamily||Thioredoxin-like superfamily||-||UBX domain
ENSMUSG00000026358	35.273	6.43594	2.4543	0.0045012	0.036556	Rgs1	-||RGS domain||RGS, subdomain 1||Regulator of G-protein signalling 1||RGS domain superfamily
ENSMUSG00000026360	1755.12	1384.53	0.34218	0.0062944	0.047977	Rgs2	RGS domain superfamily||Regulator of G-protein signalling 2||RGS, subdomain 1||RGS domain||-
ENSMUSG00000026361	1803.61	1484.11	0.28129	0.002996	0.025897	Cdc73	Cell division control protein 73, C-terminal||Paf1 complex subunit Cdc73, N-terminal domain||-||Cdc73/Parafibromin
ENSMUSG00000026365	2569.98	1349.65	0.92917	0.0012026	0.011924	Cfh	Sushi/SCR/CCP superfamily||-||Sushi/SCR/CCP domain
ENSMUSG00000026377	1164.63	647.443	0.84705	4.9832e-15	2.7934e-13	Nifk	RNA-binding domain superfamily||MKI67 FHA domain-interacting nucleolar phosphoprotein, FHA Ki67 binding||RNA recognition motif domain
ENSMUSG00000026380	89.2148	20.8023	2.1005	6.2559e-08	1.5914e-06	Tfcp2l1	Sterile alpha motif/pointed domain superfamily||CP2 transcription factor
ENSMUSG00000026387	14.8053	38.369	-1.3738	0.0037103	0.031104	Sctr	GPCR, family 2, secretin receptor||GPCR, family 2, extracellular hormone receptor domain||GPCR, family 2, secretin-like||GPCR, family 2-like||GPCR, family 2, secretin-like, conserved site||GPCR family 2, extracellular hormone receptor domain superfamily
ENSMUSG00000026389	995.68	373.472	1.4147	1.6768e-29	2.28e-27	Steap3	NAD(P)-binding domain superfamily||Ferric reductase transmembrane component-like domain||Pyrroline-5-carboxylate reductase, catalytic, N-terminal
ENSMUSG00000026393	4347.45	2853.22	0.60758	8.1428e-07	1.7231e-05	Nek7	Protein kinase domain||Protein kinase, ATP binding site||Protein kinase-like domain superfamily||Serine-threonine/tyrosine-protein kinase, catalytic domain||Serine/threonine-protein kinase, active site
ENSMUSG00000026395	422.734	154.237	1.4546	6.1093e-20	4.9723e-18	Ptprc	Fibronectin type III superfamily||Protein-tyrosine phosphatase, active site||PTP type protein phosphatase||Fibronectin type III||Protein-tyrosine phosphatase, catalytic||Immunoglobulin-like fold||Receptor-type tyrosine-protein phosphatase C||Tyrosine specific protein phosphatases domain||Protein-tyrosine phosphatase-like||Protein tyrosine phosphatase, receptor type, N-terminal
ENSMUSG00000026434	4881.72	4166.17	0.22867	0.0056844	0.044285	Nucks1	Nuclear ubiquitous casein and cyclin-dependent kinase substrate 1
ENSMUSG00000026435	301.16	438.093	-0.54071	0.00020025	0.002529	Slc45a3	Major facilitator superfamily||MFS transporter superfamily
ENSMUSG00000026436	1281.63	821.624	0.64143	1.0773e-09	3.4772e-08	Elk4	-||Ets domain||Winged helix DNA-binding domain superfamily||Winged helix-like DNA-binding domain superfamily
ENSMUSG00000026437	2336.1	3199.28	-0.45364	0.00012054	0.0016068	Cdk18	Serine/threonine-protein kinase, active site||Protein kinase-like domain superfamily||Protein kinase domain||-||Protein kinase, ATP binding site
ENSMUSG00000026443	2473.28	3121.12	-0.33564	0.004278	0.035059	Lrrn2	Leucine-rich repeat, typical subtype||Immunoglobulin I-set||Immunoglobulin-like domain||Immunoglobulin-like fold||Immunoglobulin subtype 2||Fibronectin type III||Leucine-rich repeat||Immunoglobulin subtype||Leucine-rich repeat domain superfamily||Immunoglobulin-like domain superfamily||Cysteine-rich flanking region, C-terminal
ENSMUSG00000026447	2025.21	3008.3	-0.57088	2.8459e-09	8.7438e-08	Pik3c2b	Phosphoinositide 3-kinase, accessory (PIK) domain||Phosphatidylinositol 3-/4-kinase, catalytic domain||Protein kinase-like domain superfamily||C2 domain||Armadillo-type fold||Phosphatidylinositol 3/4-kinase, conserved site||Phosphatidylinositol kinase||Ubiquitin-like domain superfamily||Phosphatidylinositol 3-kinase Ras-binding (PI3K RBD) domain||Phosphatidylinositol 3-/4-kinase, catalytic domain…
ENSMUSG00000026458	3612.93	4625.99	-0.35659	0.0016495	0.015592	Ppfia4	Liprin-alpha-4||Sterile alpha motif domain||LAR-interacting protein, Liprin||Sterile alpha motif/pointed domain superfamily
ENSMUSG00000026466	1491.5	1176.64	0.3421	0.0005648	0.0062229	Tor1aip1	Lamina-associated polypeptide 1C||-
ENSMUSG00000026475	744.149	212.477	1.8083	9.3045e-21	8.0161e-19	Rgs16	RGS domain||RGS domain superfamily||RGS, subdomain 1
ENSMUSG00000026478	5397.17	2540.56	1.0871	1.9947e-17	1.34e-15	Lamc1	Galactose-binding-like domain superfamily||Laminin EGF domain||-||Laminin, N-terminal||EGF-like domain||Laminin IV
ENSMUSG00000026479	241.838	43.7526	2.4666	1.4195e-14	7.6287e-13	Lamc2	EGF-like, conserved site||Laminin IV||EGF-like domain||Laminin subunit gamma-2||-||Laminin EGF domain
ENSMUSG00000026480	422.166	160.293	1.3971	2.0565e-18	1.4846e-16	Ncf2	Tetratricopeptide repeat-containing domain||Tetratricopeptide repeat||Tetratricopeptide repeat 1||Tetratricopeptide-like helical domain superfamily||Neutrophil cytosol factor 2, SH3 domain 1||Neutrophil cytosol factor 2, PB1 domain||PB1 domain||SH3-like domain superfamily||Neutrophil cytosol factor 2||SH3 domain
ENSMUSG00000026482	5430.98	3624.8	0.58331	2.0887e-12	9.0784e-11	Rgl1	Ras-associating (RA) domain||Ubiquitin-like domain superfamily||Ras guanine-nucleotide exchange factors catalytic domain||Ras-like guanine nucleotide exchange factor, N-terminal||-||Ras guanine-nucleotide exchange factor, conserved site||Ral guanine nucleotide dissociation stimulator-like 1||Ras guanine nucleotide exchange factor domain superfamily||Ras guanine-nucleotide exchange factor catalyti…
ENSMUSG00000026489	1221.38	1559.8	-0.35286	0.00086192	0.0089573	Coq8a	Atypical kinase COQ8A||UbiB domain||Protein kinase-like domain superfamily||UbiB domain, ADCK3-like||-
ENSMUSG00000026491	1797.43	1329.15	0.43543	5.6829e-06	0.00010213	Ahctf1	Tetratricopeptide-like helical domain superfamily||ELYS, beta-propeller domain||-||ELYS-like domain||WD40/YVTN repeat-like-containing domain superfamily
ENSMUSG00000026509	7154.21	5147.35	0.47496	4.6694e-09	1.4028e-07	Capn2	Peptidase C2, calpain family||Calpain large subunit, domain III superfamily||Calpain-2||EF-hand domain pair||EF-Hand 1, calcium-binding site||Calpain subdomain III||Peptidase C2, calpain, domain III||EF-hand domain||Peptidase C2, calpain, catalytic domain||Cysteine peptidase, cysteine active site||Peptidase C2, calpain, large subunit, domain III
ENSMUSG00000026510	1824.75	2264.98	-0.31181	0.00071449	0.0076409	Trp53bp2	SH3-like domain superfamily||Ubiquitin-like domain superfamily||Ankyrin repeat-containing domain superfamily||-||Ankyrin repeat-containing domain||SH3 domain||Ankyrin repeat
ENSMUSG00000026535	202.312	0	Inf	1.3707e-48	3.8998e-46	Ifi202b	HIN-200/IF120x
ENSMUSG00000026536	116.624	5.59433	4.3818	3.8681e-21	3.3929e-19	Mnda	HIN-200/IF120x||DAPIN domain
ENSMUSG00000026547	2503.49	421.774	2.5694	3.4928e-19	2.7e-17	Tagln2	Calponin homology domain||Calponin-like domain superfamily||Smooth muscle protein/calponin||Transgelin-2||Calponin repeat
ENSMUSG00000026556	1047.76	1548.84	-0.56387	7.035e-05	0.00098712	Vangl2	Vang-like protein
ENSMUSG00000026558	2888.34	1424.1	1.0202	4.0597e-29	5.433e-27	Uck2	Uridine kinase-like||P-loop containing nucleoside triphosphate hydrolase||Phosphoribulokinase/uridine kinase||-||Uridine-cytidine kinase 2
ENSMUSG00000026563	704.782	881.248	-0.32237	0.0039496	0.032784	Tada1	Transcriptional coactivator Hfi1/Transcriptional adapter 1||-
ENSMUSG00000026580	385.092	0	Inf	4.9462e-35	8.458e-33	Selp	Selectin superfamily||Sushi/SCR/CCP superfamily||EGF-like, conserved site||EGF-like calcium-binding domain||EGF-like domain||C-type lectin, conserved site||Selectin, C-type lectin-like domain||Sushi/SCR/CCP domain||C-type lectin-like/link domain superfamily||C-type lectin fold||-||C-type lectin-like
ENSMUSG00000026581	238.363	5.14339	5.5343	1.5545e-09	4.9007e-08	Sell	EGF-like, conserved site||Sushi/SCR/CCP superfamily||Selectin superfamily||C-type lectin, conserved site||EGF-like domain||Sushi/SCR/CCP domain||Selectin, C-type lectin-like domain||C-type lectin-like/link domain superfamily||C-type lectin fold||L-selectin||C-type lectin-like
ENSMUSG00000026582	399.85	3.69166	6.759	1.664e-18	1.2142e-16	Sele	Sushi/SCR/CCP domain||Selectin, C-type lectin-like domain||EGF-like, conserved site||Selectin superfamily||Sushi/SCR/CCP superfamily||C-type lectin, conserved site||EGF-like domain||EGF-like calcium-binding domain||C-type lectin-like||C-type lectin-like/link domain superfamily||C-type lectin fold
ENSMUSG00000026594	1175.74	934.429	0.33141	0.0014403	0.013886	Ralgps2	PH-like domain superfamily||-||Ras guanine-nucleotide exchange factor catalytic domain superfamily||Ras guanine nucleotide exchange factor domain superfamily||Ras guanine-nucleotide exchange factors catalytic domain||Pleckstrin homology domain||Ras-specific guanine nucleotide-releasing factor RalGPS1/2
ENSMUSG00000026614	266.36	355.856	-0.41792	0.0065978	0.049919	Slc30a10	Cation efflux protein, cytoplasmic domain superfamily||Cation efflux protein||Cation efflux transmembrane domain superfamily
ENSMUSG00000026628	1079.34	36.0486	4.9041	5.2246e-156	1.6081e-152	Atf3	AP-1 transcription factor||cAMP-dependent transcription factor ATF-3||Transcription factor, Skn-1-like, DNA-binding domain superfamily||Basic-leucine zipper domain
ENSMUSG00000026630	164.689	72.9915	1.1739	1.9642e-06	3.8354e-05	Batf3	Basic-leucine zipper domain||Basic leucine zipper transcriptional factor ATF-like 3||AP-1 transcription factor
ENSMUSG00000026632	388.849	602.718	-0.63227	1.3885e-06	2.815e-05	Tatdn3	Metal-dependent hydrolase||TatD family
ENSMUSG00000026640	4380.55	3531.92	0.31066	0.0055776	0.043704	Plxna2	Plexin repeat||Immunoglobulin E-set||Plexin, cytoplasmic RasGAP domain||PSI domain||WD40/YVTN repeat-like-containing domain superfamily||Plexin family||Rho GTPase activation protein||Sema domain superfamily||-||IPT domain||Sema domain||Immunoglobulin-like fold
ENSMUSG00000026655	967.7	508.066	0.92954	1.4807e-06	2.9842e-05	Fam107b	-||Protein of unknown function DUF1151
ENSMUSG00000026656	962.439	145.536	2.7253	7.2304e-44	1.7362e-41	Fcgr2b	Cytochrome c1, transmembrane anchor, C-terminal||Immunoglobulin-like domain||Immunoglobulin-like domain superfamily||Immunoglobulin-like fold||Immunoglobulin subtype
ENSMUSG00000026657	5237.13	2914.39	0.84558	7.9345e-24	8.1656e-22	Frmd4a	-||Ubiquitin-like domain superfamily||FERM, C-terminal PH-like domain||FERM, N-terminal||FERM superfamily, second domain||FERM/acyl-CoA-binding protein superfamily||FERM central domain||FERM conserved site||PH-like domain superfamily||Domain of unknown function DUF3338||FERM domain||Band 4.1 domain
ENSMUSG00000026663	2388.6	1843.69	0.37357	3.1535e-05	0.00048051	Atf6	Basic-leucine zipper domain||cAMP-dependent transcription factor ATF-6 alpha||Transcription factor, Skn-1-like, DNA-binding domain superfamily
ENSMUSG00000026669	25.1722	59.5867	-1.2432	0.0011317	0.011353	Mcm10	Zinc finger, Mcm10/DnaG-type||Replication factor Mcm10, C-terminal
ENSMUSG00000026670	3165.36	2258.17	0.48721	6.62e-07	1.4258e-05	Uap1	UDPGP family||Nucleotide-diphospho-sugar transferases
ENSMUSG00000026675	3187.08	2196.49	0.53703	7.1941e-10	2.3904e-08	Hsd17b7	Short-chain dehydrogenase/reductase SDR||NAD(P)-binding domain superfamily
ENSMUSG00000026678	2956.24	1671.01	0.82304	2.9432e-20	2.4666e-18	Rgs5	RGS domain||Regulator of G-protein signalling 5||Regulator of G-protein signalling 5, RGS domain||RGS domain superfamily||RGS, subdomain 1
ENSMUSG00000026697	1533.01	2487.62	-0.6984	0.0010409	0.010559	Myoc	Olfactomedin-like domain||WD40/YVTN repeat-like-containing domain superfamily||Myocilin
ENSMUSG00000026726	39.5378	91.639	-1.2127	5.4782e-05	0.00078794	Cubn	EGF-type aspartate/asparagine hydroxylation site||Spermadhesin, CUB domain superfamily||EGF-like calcium-binding, conserved site||CUB domain||EGF domain||EGF-like domain||EGF-like calcium-binding domain||EGF-like, conserved site
ENSMUSG00000026728	11853.5	2831.4	2.0657	9.2314e-15	5.074e-13	Vim	Intermediate filament protein, conserved site||Vimentin||Intermediate filament protein||Intermediate filament head, DNA-binding domain
ENSMUSG00000026740	988.4	698.873	0.50006	5.44e-05	0.00078344	Dnajc1	DnaJ domain superfamily||Homeobox-like domain superfamily||DnaJ domain||SANT domain||Myb-like domain||SANT/Myb domain||DnaJ domain, conserved site||-
ENSMUSG00000026748	1876.42	2257.18	-0.26653	0.0027857	0.02434	Plxdc2	Plexin repeat||PSI domain||Plexin domain-containing protein||Plexin domain-containing protein 2
ENSMUSG00000026749	2061.35	1084.48	0.92659	4.3204e-22	3.9858e-20	Nek6	Serine/threonine-protein kinase, active site||Protein kinase, ATP binding site||-||Protein kinase domain||Serine-threonine/tyrosine-protein kinase, catalytic domain||Protein kinase-like domain superfamily
ENSMUSG00000026753	1890.45	1477.19	0.35588	0.00017469	0.0022311	Ppp6c	Serine/threonine-specific protein phosphatase/bis(5-nucleosyl)-tetraphosphatase||Calcineurin-like phosphoesterase domain, ApaH type||Metallo-dependent phosphatase-like||-
ENSMUSG00000026766	1673.4	1392.99	0.26459	0.0052505	0.041632	Mmadhc	Methylmalonic aciduria and homocystinuria type D protein
ENSMUSG00000026773	5936.39	4117.75	0.52773	1.6771e-10	5.9398e-09	Pfkfb3	Phosphoglycerate/bisphosphoglycerate mutase, active site||6-phosphofructo-2-kinase||Histidine phosphatase superfamily||Histidine phosphatase superfamily, clade-1||Fructose-2,6-bisphosphatase||P-loop containing nucleoside triphosphate hydrolase||-
ENSMUSG00000026778	850.042	1102.42	-0.37506	0.00046421	0.0052618	Prkcq	Protein kinase, ATP binding site||Protein kinase domain||Protein kinase-like domain superfamily||Diacylglycerol/phorbol-ester binding||Protein kinase, C-terminal||AGC-kinase, C-terminal||Novel protein kinase C theta, catalytic domain||Serine/threonine-protein kinase, active site||Protein kinase C, theta||C2 domain superfamily||Protein kinase C-like, phorbol ester/diacylglycerol-binding domain||Pr…
ENSMUSG00000026791	954.299	1237.46	-0.37486	0.000393	0.0045584	Slc2a8	MFS transporter superfamily||Major facilitator superfamily domain||Sugar transporter, conserved site||-||Major facilitator, sugar transporter-like||Sugar/inositol transporter
ENSMUSG00000026792	2680.5	3267.18	-0.28555	0.00090607	0.0093473	Lrsam1	-||Leucine-rich repeat, typical subtype||Sterile alpha motif domain||Leucine-rich repeat domain superfamily||Leucine-rich repeat||Zinc finger, RING-type||Sterile alpha motif/pointed domain superfamily
ENSMUSG00000026796	6041.6	2719.6	1.1515	5.8684e-19	4.445e-17	Fam129b	Pleckstrin homology domain||Niban-like||PH-like domain superfamily
ENSMUSG00000026806	352.531	249.939	0.49618	0.0014631	0.014057	Ddx31	DEAD/DEAH box helicase domain||ATP-dependent RNA helicase DEAD-box, conserved site||Helicase superfamily 1/2, ATP-binding domain||Helicase, C-terminal||P-loop containing nucleoside triphosphate hydrolase||Domain of unknown function DUF4217||RNA helicase, DEAD-box type, Q motif
ENSMUSG00000026814	1320.09	413.27	1.6755	9.9772e-14	4.946e-12	Eng	Zona pellucida domain
ENSMUSG00000026817	5864.06	6887.25	-0.23203	0.0036666	0.030836	Ak1	Adenylate kinase isoenzyme 1||Adenylate kinase/UMP-CMP kinase||P-loop containing nucleoside triphosphate hydrolase||Adenylate kinase, isozyme 1/5||Adenylate kinase, conserved site
ENSMUSG00000026821	9537.32	5083.03	0.9079	1.8781e-27	2.2956e-25	Ralgds	Ral guanine nucleotide dissociation stimulator||Ras guanine-nucleotide exchange factor, conserved site||Ras guanine nucleotide exchange factor domain superfamily||Ras guanine-nucleotide exchange factor catalytic domain superfamily||Ras-associating (RA) domain||Ras guanine-nucleotide exchange factors catalytic domain||Ubiquitin-like domain superfamily||Ras-like guanine nucleotide exchange factor, …
ENSMUSG00000026822	5821.51	61.1563	6.5728	1.9537e-249	1.6537e-245	Lcn2	Neutrophil gelatinase-associated lipocalin/epididymal-specific lipocalin-12||Lipocalin family conserved site||Calycin||Lipocalin||Lipocalin/cytosolic fatty-acid binding domain
ENSMUSG00000026826	193.614	107.194	0.85296	0.00024813	0.0030483	Nr4a2	Orphan nuclear receptor, NURR type||-||Zinc finger, nuclear hormone receptor-type||Nuclear hormone receptor, ligand-binding domain||Nuclear hormone receptor||Orphan nuclear receptor||Zinc finger, NHR/GATA-type||Nuclear hormone receptor-like domain superfamily
ENSMUSG00000026832	139.404	2.28631	5.9301	2.6774e-17	1.7951e-15	Cytip	PDZ superfamily||PDZ domain
ENSMUSG00000026834	175.503	279.85	-0.67316	0.00011812	0.0015795	Acvr1c	Serine-threonine/tyrosine-protein kinase, catalytic domain||Protein kinase-like domain superfamily||Protein kinase, ATP binding site||Protein kinase domain||Activin types I and II receptor domain||Serine/threonine-protein kinase, active site||GS domain||Ser/Thr protein kinase, TGFB receptor
ENSMUSG00000026836	1065.43	734.897	0.53582	6.4351e-07	1.388e-05	Acvr1	Serine-threonine/tyrosine-protein kinase, catalytic domain||Protein kinase-like domain superfamily||Protein kinase domain||Protein kinase, ATP binding site||Activin types I and II receptor domain||GS domain||Serine/threonine-protein kinase, active site||Ser/Thr protein kinase, TGFB receptor
ENSMUSG00000026848	1416.98	1135.11	0.31998	0.0015696	0.014945	Tor1b	Torsin||P-loop containing nucleoside triphosphate hydrolase||AAA+ ATPase domain||-||Torsin-1B||Torsin 1/2
ENSMUSG00000026854	3408.5	4270.34	-0.32521	0.00017403	0.0022256	Usp20	DUSP-like superfamily||Zinc finger, RING/FYVE/PHD-type||Peptidase C19, ubiquitin-specific peptidase, DUSP domain||-||Zinc finger, UBP-type||Ubiquitin specific protease, conserved site||Peptidase C19, ubiquitin carboxyl-terminal hydrolase||Ubiquitin specific protease domain
ENSMUSG00000026857	1380.58	955.648	0.53072	2.4038e-07	5.5861e-06	Ntmt1	S-adenosyl-L-methionine-dependent methyltransferase||Alpha-N-methyltransferase NTM1||-
ENSMUSG00000026860	9825.57	12751.6	-0.37607	2.1301e-06	4.1353e-05	Sh3glb2	Endophilin-B2||Endophilin B2, SH3 domain||SH3 domain||SH3-like domain superfamily||AH/BAR domain superfamily||BAR domain
ENSMUSG00000026864	13003.9	7755.45	0.74566	1.5427e-12	6.8189e-11	Hspa5	-||Heat shock protein 70 family||Heat shock protein 70kD, C-terminal domain superfamily||Heat shock protein 70kD, peptide-binding domain superfamily||Heat shock protein 70, conserved site
ENSMUSG00000026872	3983.9	4701.28	-0.23887	0.0045288	0.036754	Zeb2	Homeobox domain||-||Zinc finger, RING/FYVE/PHD-type||Drought induced 19 protein type, zinc-binding domain||Homeobox-like domain superfamily||Zinc finger C2H2-type||At2g23090-like||Zinc finger C2H2 superfamily
ENSMUSG00000026880	921.544	344.176	1.4209	2.511e-05	0.00039232	Stom	Erythrocyte band 7 integral membrane protein (Stomatin)||Stomatin family||Band 7/stomatin-like, conserved site||Band 7 domain||Band 7/SPFH domain superfamily
ENSMUSG00000026889	1544.62	1072.3	0.52654	1.5572e-07	3.7262e-06	Rbm18	-||RNA-binding domain superfamily||RNA recognition motif domain
ENSMUSG00000026894	12.9321	35.3017	-1.4488	0.0037648	0.031458	Morn5	MORN motif
ENSMUSG00000026896	279.997	157.509	0.82998	2.6187e-06	5.0149e-05	Ifih1	P-loop containing nucleoside triphosphate hydrolase||Helicase superfamily 1/2, ATP-binding domain||Helicase, C-terminal||Helicase/UvrB, N-terminal||Caspase recruitment domain||RIG-I-like receptor, C-terminal regulatory domain||Death-like domain superfamily
ENSMUSG00000026904	3751.7	4545.57	-0.27692	0.0007414	0.0078839	Slc4a10	Band 3 cytoplasmic domain||Phosphotransferase/anion transporter||Bicarbonate transporter, eukaryotic||Sodium bicarbonate cotransporter||Bicarbonate transporter, C-terminal
ENSMUSG00000026917	1139.3	781.851	0.54319	2.4965e-07	5.7737e-06	Wdr5	WD40 repeat||WD40 repeat, conserved site||WD40-repeat-containing domain superfamily||WD40/YVTN repeat-like-containing domain superfamily||G-protein beta WD-40 repeat||WD40-repeat-containing domain
ENSMUSG00000026921	719.095	518.435	0.47202	4.5455e-05	0.00066768	Egfl7	EGF-like domain||EGF-like calcium-binding domain||EMI domain||EGF-like, conserved site||EGF-like calcium-binding, conserved site||-
ENSMUSG00000026922	134.477	70.4542	0.9326	0.00011561	0.0015502	Agpat2	Phospholipid/glycerol acyltransferase||1-acyl-sn-glycerol-3-phosphate acyltransferase
ENSMUSG00000026923	2056.65	1658.81	0.31015	0.00055104	0.0060971	Notch1	EGF-like calcium-binding, conserved site||Ankyrin repeat-containing domain||Notch, NOD domain||-||Growth factor receptor cysteine-rich domain superfamily||Domain of unknown function DUF3454, notch||Neurogenic locus Notch 1||Ankyrin repeat||Notch, NODP domain||Ankyrin repeat-containing domain superfamily||EGF-like domain||EGF-like, conserved site||EGF-type aspartate/asparagine hydroxylation site||…
ENSMUSG00000026924	2814.78	2211.38	0.34807	0.00014858	0.0019356	Sec16a	Ancestral coatomer element 1, Sec16/Sec31||COPII coat assembly protein, Sec16||-||Sec16, central conserved domain
ENSMUSG00000026925	1319.4	1610.83	-0.28792	0.003899	0.032427	Inpp5e	Inositol polyphosphate-related phosphatase||Endonuclease/exonuclease/phosphatase||Endonuclease/exonuclease/phosphatase superfamily
ENSMUSG00000026932	22835.5	27639	-0.27543	0.00038112	0.0044496	Nacc2	SKP1/BTB/POZ domain superfamily||BEN domain||BTB/POZ domain
ENSMUSG00000026946	230.352	144.147	0.6763	0.0004429	0.0050592	Nmi	Nmi/IFP 35 domain||Nmi/IFP 35 domain, N-terminal||N-myc-interactor
ENSMUSG00000026959	12573.8	15733	-0.32337	0.00087505	0.0090659	Grin1	Ionotropic glutamate receptor, metazoa||Periplasmic binding protein-like I||Calmodulin-binding domain C0, NMDA receptor, NR1 subunit||Ionotropic glutamate receptor, L-glutamate and glycine-binding domain||Receptor, ligand binding region||Ionotropic glutamate receptor
ENSMUSG00000026965	5418.49	6371.77	-0.2338	0.0043173	0.035311	Anapc2	Cullin, N-terminal||-||Winged helix-like DNA-binding domain superfamily||Cullin homology domain superfamily||Cullin homology domain||Winged helix DNA-binding domain superfamily||Anaphase-promoting complex subunit 2, C-terminal
ENSMUSG00000026970	2423.51	1552.51	0.6425	1.5739e-12	6.9477e-11	Rbms1	RNA recognition motif domain||MSSP-1, RNA recognition motif 1||Paraneoplastic encephalomyelitis antigen||RNA-binding domain superfamily
ENSMUSG00000026979	180.371	88.1394	1.0331	8.6937e-07	1.8317e-05	Psd4	PH-like domain superfamily||-||Sec7 domain superfamily||Sec7, C-terminal domain superfamily||Sec7 domain||Pleckstrin homology domain
ENSMUSG00000026981	670.048	0.381293	10.779	1.3082e-195	6.3277e-192	Il1rn	Interleukin-1 conserved site||Cytokine IL1/FGF||Interleukin-1 receptor antagonist/Interleukin-36||Interleukin-1 family
ENSMUSG00000027007	6368.3	3388.09	0.91043	1.1923e-27	1.4787e-25	Ssfa2	Sperm-specific antigen 2, C-terminal||Sperm-specific antigen 2||IP3R-interacting domain
ENSMUSG00000027035	1065.73	688.883	0.62952	1.3967e-08	3.9706e-07	Cers6	Homeobox-like domain superfamily||TRAM/LAG1/CLN8 homology domain||Sphingosine N-acyltransferase Lag1/Lac1-like||Homeobox domain
ENSMUSG00000027068	47.3244	0.961976	5.6204	1.7704e-14	9.4396e-13	Dhrs9	Short-chain dehydrogenase/reductase SDR||NAD(P)-binding domain superfamily
ENSMUSG00000027074	331.744	54.4472	2.6071	1.7241e-11	6.7253e-10	Slc43a3	MFS transporter superfamily||Major facilitator superfamily||Solute carrier family 43 member 3
ENSMUSG00000027075	66.8813	15.7835	2.0832	0.0012625	0.012437	Slc43a1	Major facilitator superfamily domain||MFS transporter superfamily||Major facilitator superfamily
ENSMUSG00000027078	374.13	185.342	1.0133	0.0024363	0.021829	Ube2l6	Ubiquitin-conjugating enzyme E2||Ubiquitin-conjugating enzyme, active site||Ubiquitin-conjugating enzyme/RWD-like
ENSMUSG00000027080	984.692	766.703	0.361	0.0011361	0.01138	Med19	Mediator complex, subunit Med19, metazoa
ENSMUSG00000027087	5709.59	4016.87	0.50732	1.1455e-09	3.6763e-08	Itgav	Integrin alpha-2||Integrin alpha chain, C-terminal cytoplasmic region, conserved site||Integrin domain superfamily||Integrin alpha chain||Integrin alpha beta-propellor||FG-GAP repeat
ENSMUSG00000027091	5283.14	4440.67	0.25062	0.0035971	0.030319	Zc3h15	Zinc finger, CCCH-type superfamily||Zinc finger, CCCH-type||ZC3H15/TMA46 family, C-terminal
ENSMUSG00000027102	2881.79	3414.04	-0.24451	0.0035762	0.03018	Hoxd8	Homeobox domain, metazoa||Homeobox, conserved site||Homeobox protein, antennapedia type, conserved site||Homeobox-like domain superfamily||Homeobox domain
ENSMUSG00000027109	1559.05	1205.23	0.37135	0.00016721	0.0021551	Sp3	Zinc finger C2H2-type||Transcription factor Sp3||Zinc finger C2H2 superfamily
ENSMUSG00000027111	2167.2	1567.64	0.46724	4.2885e-07	9.5652e-06	Itga6	Integrin domain superfamily||Integrin alpha beta-propellor||Integrin alpha chain||Integrin alpha-2||Integrin alpha chain, C-terminal cytoplasmic region, conserved site
ENSMUSG00000027130	2771.89	3271.79	-0.23921	0.0047649	0.038512	Slc12a6	SLC12A transporter family||K/Cl co-transporter 1||SLC12A transporter, C-terminal||Amino acid permease/ SLC12A domain||K/Cl co-transporter||K/Cl co-transporter 3
ENSMUSG00000027160	463.003	605.057	-0.38605	0.0021557	0.01963	Ccdc34	-
ENSMUSG00000027162	3074.75	2564.15	0.26199	0.0029714	0.025711	Lin7c	L27 domain superfamily||L27 domain||Protein lin-7||L27 domain, C-terminal||PDZ superfamily||PDZ domain
ENSMUSG00000027173	53.9344	129.523	-1.2639	6.3859e-07	1.3797e-05	Depdc7	DEP domain||Winged helix-like DNA-binding domain superfamily||Winged helix DNA-binding domain superfamily||Rho GTPase activation protein
ENSMUSG00000027177	4973.15	3884.77	0.35633	2.0167e-05	0.00032178	Hipk3	Protein kinase, ATP binding site||Protein kinase domain||Protein kinase-like domain superfamily||Serine/threonine-protein kinase, active site
ENSMUSG00000027187	2983.55	3565.82	-0.2572	0.0028638	0.024913	Cat	Catalase, mono-functional, haem-containing, clades 1 and 3||Catalase haem-binding site||Catalase superfamily||Catalase core domain||Catalase active site||Catalase, mono-functional, haem-containing||Catalase immune-responsive domain||Catalase core domain superfamily
ENSMUSG00000027188	545.723	797.778	-0.54782	3.2686e-06	6.1722e-05	Pamr1	Spermadhesin, CUB domain superfamily||Serine proteases, trypsin domain||Peptidase S1A, chymotrypsin family||CUB domain||Sushi/SCR/CCP superfamily||Peptidase S1, PA clan||EGF-like, conserved site||EGF-like calcium-binding domain||EGF-like domain||Sushi/SCR/CCP domain
ENSMUSG00000027195	4881.84	3959.58	0.30208	0.00034956	0.0041368	Hsd17b12	Short-chain dehydrogenase/reductase, conserved site||NAD(P)-binding domain superfamily||Short-chain dehydrogenase/reductase SDR
ENSMUSG00000027200	4238.96	6184.84	-0.54503	3.415e-11	1.3006e-09	Sema6d	WD40/YVTN repeat-like-containing domain superfamily||Plexin repeat||Sema domain||Semaphorin||Sema domain superfamily
ENSMUSG00000027219	22.6641	5.16088	2.1347	0.0023257	0.021009	Slc28a2	Concentrative nucleoside transporter||Concentrative nucleoside transporter, metazoan/bacterial||Concentrative nucleoside transporter CNT1/CNT2||Concentrative nucleoside transporter C-terminal domain||Nucleoside transporter/FeoB GTPase, Gate domain||Concentrative nucleoside transporter N-terminal domain
ENSMUSG00000027223	23021.2	26878.9	-0.22351	0.0052137	0.04139	Mapk8ip1	SH3-like domain superfamily||PTB/PI domain||JIP1, SH3 domain||PH-like domain superfamily||SH3 domain
ENSMUSG00000027227	978.388	1238.78	-0.34044	0.00072361	0.0077239	Sord	Alcohol dehydrogenase, N-terminal||GroES-like superfamily||NAD(P)-binding domain superfamily||Alcohol dehydrogenase, C-terminal||Polyketide synthase, enoylreductase domain||Alcohol dehydrogenase, zinc-type, conserved site
ENSMUSG00000027230	318.088	90.8639	1.8076	6.5879e-15	3.6446e-13	Creb3l1	cAMP response element binding (CREB) protein||cAMP-responsive element-binding protein 3-like protein 1||Basic-leucine zipper domain||Transcription factor, Skn-1-like, DNA-binding domain superfamily
ENSMUSG00000027236	2313.05	1402.98	0.7213	8.8833e-15	4.8906e-13	Eif3j1	Eukaryotic translation initiation factor 3-like domain superfamily||Eukaryotic translation initiation factor 3 subunit J
ENSMUSG00000027238	2655.14	3545	-0.417	1.9396e-06	3.7951e-05	Frmd5	-||FERM superfamily, second domain||FERM/acyl-CoA-binding protein superfamily||Ezrin/radixin/moesin-like||FERM, N-terminal||Ubiquitin-like domain superfamily||FERM, C-terminal PH-like domain||FERM conserved site||PH-like domain superfamily||FERM adjacent (FA)||FERM central domain||Band 4.1 domain||FERM domain
ENSMUSG00000027248	7814.68	6490.44	0.26787	0.00093103	0.0095639	Pdia3	Thioredoxin domain||-||Disulphide isomerase||Thioredoxin-like superfamily||Thioredoxin, conserved site||Protein disulphide isomerase
ENSMUSG00000027257	2118.13	3120.45	-0.55896	8.8929e-08	2.2188e-06	Pacsin3	SH3-like domain superfamily||F-BAR domain||FCH domain||AH/BAR domain superfamily||Protein kinase C and casein kinase substrate in neurons protein 3||SH3 domain
ENSMUSG00000027276	626.54	388.621	0.68904	0.00029147	0.0035169	Jag1	Notch ligand, N-terminal domain||VWFC domain||EGF-like, conserved site||Jagged/Serrate protein||Delta/Serrate/lag-2 (DSL) protein||EGF-like domain||EGF-like calcium-binding domain||Growth factor receptor cysteine-rich domain superfamily||EGF-like calcium-binding, conserved site||EGF-type aspartate/asparagine hydroxylation site
ENSMUSG00000027284	797.566	1015.65	-0.34873	0.0012779	0.012566	Cdan1	Codanin-1, C-terminal domain
ENSMUSG00000027285	1142	898.195	0.34646	0.0011635	0.011603	Haus2	-||HAUS augmin-like complex subunit 2, metazoa||HAUS augmin-like complex subunit 2
ENSMUSG00000027287	811.846	628.093	0.37023	0.0013669	0.013287	Snap23	Target SNARE coiled-coil homology domain||-||SNAP-25
ENSMUSG00000027293	1862.93	1300.79	0.51818	3.5982e-08	9.5476e-07	Ehd4	EF-hand domain pair||EH domain-containing protein, N-terminal||EH domain||EF-Hand 1, calcium-binding site||P-loop containing nucleoside triphosphate hydrolase||EH domain-containing protein 4||Dynamin-type guanine nucleotide-binding (G) domain||EF-hand domain||Dynamin superfamily
ENSMUSG00000027297	299.165	462.888	-0.62972	3.4832e-05	0.00052462	Ltk	Tyrosine-protein kinase, receptor class II, conserved site||Tyrosine-protein kinase, catalytic domain||Protein kinase, ATP binding site||Protein kinase domain||Tyrosine-protein kinase, active site||Serine-threonine/tyrosine-protein kinase, catalytic domain||Protein kinase-like domain superfamily
ENSMUSG00000027298	2837.08	4637.66	-0.70899	1.2809e-16	8.2763e-15	Tyro3	Fibronectin type III superfamily||Tyrosine-protein kinase, active site||Immunoglobulin-like domain superfamily||Immunoglobulin subtype 2||Immunoglobulin-like fold||Immunoglobulin subtype||Fibronectin type III||Protein kinase, ATP binding site||Tyrosine-protein kinase, catalytic domain||Protein kinase domain||Immunoglobulin-like domain||Immunoglobulin I-set||Protein kinase-like domain superfamily|…
ENSMUSG00000027309	5621.88	7460.41	-0.4082	4.1129e-07	9.1916e-06	4930402H24Rik	-
ENSMUSG00000027312	7148.39	8433.6	-0.23853	0.0025464	0.022588	Atrn	Spermadhesin, CUB domain superfamily||Plexin repeat||PSI domain||C-type lectin fold||C-type lectin-like/link domain superfamily||Kelch-type beta propeller||CUB domain||Galactose oxidase, beta-propeller||C-type lectin-like||EGF-like, conserved site||Kelch repeat type 1||EGF-like domain||Galactose oxidase/kelch, beta-propeller||Laminin EGF domain
ENSMUSG00000027313	529.401	403.168	0.39298	0.0026145	0.023065	Chac1	Gamma-glutamyl cyclotransferase-like superfamily||Gamma-glutamyl cyclotransferase-like||Glutathione-specific gamma-glutamylcyclotransferase
ENSMUSG00000027314	177.202	85.1176	1.0579	3.5957e-05	0.00053964	Dll4	EGF-like domain||EGF-like calcium-binding domain||Delta/Serrate/lag-2 (DSL) protein||EGF-type aspartate/asparagine hydroxylation site||EGF-like, conserved site||Growth factor receptor cysteine-rich domain superfamily||Notch ligand, N-terminal domain
ENSMUSG00000027315	181.025	39.7137	2.1885	2.809e-18	2.0065e-16	Spint1	Proteinase inhibitor I2, Kunitz, conserved site||Seven cysteines, N-terminal||Pancreatic trypsin inhibitor Kunitz domain||Low-density lipoprotein (LDL) receptor class A repeat||Low-density lipoprotein (LDL) receptor class A, conserved site||Pancreatic trypsin inhibitor Kunitz domain superfamily||MANSC domain||LDL receptor-like superfamily
ENSMUSG00000027318	204.351	333.626	-0.70718	0.0035518	0.029997	Adam33	ADAM, cysteine-rich||Metallopeptidase, catalytic domain superfamily||EGF-like domain||Peptidase M12B, ADAM/reprolysin||Reprolysin domain, adamalysin-type||Disintegrin domain superfamily||Disintegrin domain||EGF-like, conserved site||Disintegrin, conserved site||-||Peptidase M12B, propeptide
ENSMUSG00000027330	271.224	442.287	-0.7055	1.7892e-06	3.5324e-05	Cdc25b	M-phase inducer phosphatase||Rhodanese-like domain||Rhodanese-like domain superfamily
ENSMUSG00000027333	5804.08	4225.7	0.45788	2.0095e-06	3.9148e-05	Smox	-||FAD/NAD(P)-binding domain superfamily||Amine oxidase
ENSMUSG00000027342	3249.8	2407.19	0.433	2.7529e-05	0.00042619	Pcna	Proliferating cell nuclear antigen, PCNA, N-terminal||Proliferating cell nuclear antigen, PCNA, conserved site||Proliferating cell nuclear antigen, PCNA||Proliferating cell nuclear antigen, PCNA, C-terminal
ENSMUSG00000027351	6995.63	4851.86	0.52791	1.2353e-10	4.4686e-09	Spred1	Sprouty||c-Kit-binding domain||WH1/EVH1 domain||PH-like domain superfamily
ENSMUSG00000027358	560.945	365.887	0.61646	3.51e-05	0.00052819	Bmp2	Transforming growth factor-beta, C-terminal||Transforming growth factor beta, conserved site||TGF-beta, propeptide||Transforming growth factor-beta-related||Cystine-knot cytokine
ENSMUSG00000027360	708.468	104.419	2.7623	2.8296e-10	9.8362e-09	Hdc	Pyridoxal phosphate-dependent transferase, major region, subdomain 1||Pyridoxal phosphate-dependent decarboxylase||Pyridoxal phosphate-dependent transferase, subdomain 2||Pyridoxal phosphate-dependent transferase||Aromatic-L-amino-acid decarboxylase||Pyridoxal-phosphate binding site
ENSMUSG00000027368	75.768	33.1095	1.1943	0.00035751	0.0042117	Dusp2	Dual specificity phosphatase, catalytic domain||Rhodanese-like domain superfamily||Protein-tyrosine phosphatase, active site||Rhodanese-like domain||Protein-tyrosine phosphatase, catalytic||Dual specificity phosphatase||Atypical dual specificity phosphatase||Tyrosine specific protein phosphatases domain||Protein-tyrosine phosphatase-like||Dual specificity protein phosphatase domain||Mitogen-activ…
ENSMUSG00000027376	61.9008	25.0476	1.3053	0.00039226	0.0045546	Prom2	Prominin
ENSMUSG00000027377	128.707	4.65598	4.7889	1.5337e-10	5.466e-09	Mall	Marvel domain||Myelin and lymphocyte (MAL) protein
ENSMUSG00000027381	354.731	248.04	0.51615	0.00087377	0.0090554	Bcl2l11	Bcl-2-like protein 11||Bcl-x interacting, BH3 domain||Blc2-like superfamily||Apoptosis, Bim N-terminal
ENSMUSG00000027395	889.166	541.962	0.71426	1.4851e-07	3.5637e-06	Polr1b	RNA polymerase Rpb2, domain 2 superfamily||RNA polymerase Rpb2, domain 3||DNA-directed RNA polymerase, subunit 2, hybrid-binding domain superfamily||DNA-directed RNA polymerase, subunit 2||RNA polymerase, beta subunit, protrusion||DNA-directed RNA polymerase I subunit RPA2, domain 4||RNA polymerase Rpb2, domain 2||RNA polymerase Rpb2, domain 7||DNA-directed RNA polymerase, subunit 2, hybrid-bindi…
ENSMUSG00000027398	1130.63	4.38838	8.0092	2.7778e-21	2.4492e-19	Il1b	Interleukin-1 family||Interleukin-1 beta||Interleukin-1 propeptide||Cytokine IL1/FGF||Interleukin-1 conserved site
ENSMUSG00000027399	84.6212	12.6882	2.7375	5.9656e-08	1.5198e-06	Il1a	Interleukin-1 propeptide||Interleukin-1 conserved site||Cytokine IL1/FGF||Interleukin-1 family||Interleukin-1 alpha
ENSMUSG00000027400	1554.05	647.736	1.2626	6.4961e-27	7.7719e-25	Pdyn	Proenkephalin B||Opioid neuropeptide precursor
ENSMUSG00000027404	3789.9	2920.01	0.37619	9.6697e-06	0.00016527	Snrpb	Small ribonucleoprotein associated, SmB/SmN||LSM domain superfamily||-||LSM domain, eukaryotic/archaea-type
ENSMUSG00000027405	4517.18	3830.65	0.23783	0.0036618	0.030803	Nop56	Nop domain superfamily||NOP5, N-terminal||-||NOSIC||Nop domain
ENSMUSG00000027412	235.274	59.2224	1.9901	1.126e-19	9.0557e-18	Lpin3	LNS2/PITP||Lipin, middle domain||HAD-like superfamily||Lipin, N-terminal||Lipin/Ned1/Smp2 (LNS2)||HAD superfamily
ENSMUSG00000027422	5964.56	4487.87	0.41039	4.5084e-07	1.0016e-05	Rrbp1	Ribosome receptor lysine/proline rich
ENSMUSG00000027434	278.141	423.844	-0.60771	0.00031438	0.0037665	Nkx2-2	Homeobox domain||Homeobox-like domain superfamily||Homeobox, conserved site||Homeobox domain, metazoa
ENSMUSG00000027435	964.958	156.14	2.6276	3.4815e-46	9.1377e-44	Cd93	EGF-type aspartate/asparagine hydroxylation site||C-type lectin fold||C-type lectin-like/link domain superfamily||Growth factor receptor cysteine-rich domain superfamily||EGF-like calcium-binding, conserved site||C-type lectin-like||Complement Clr-like EGF domain||EGF-like, conserved site||EGF-like domain||EGF-like calcium-binding domain
ENSMUSG00000027452	741.939	1079.19	-0.54057	5.0351e-07	1.1085e-05	Acss1	AMP-binding, conserved site||Acetyl-coenzyme A synthetase, N-terminal domain||AMP-binding enzyme, C-terminal domain||Acetate-CoA ligase||AMP-dependent synthetase/ligase
ENSMUSG00000027463	109.105	46.9574	1.2163	0.00011136	0.001498	Slc52a3	Solute carrier family 52, riboflavin transporter
ENSMUSG00000027474	205.843	115.413	0.83474	2.3e-05	0.00036169	Ccm2l	PH-like domain superfamily
ENSMUSG00000027479	5467.43	4663.94	0.22931	0.0049496	0.039734	Mapre1	EB1, C-terminal||EB1, Metazoa||Calponin homology domain||Calponin-like domain superfamily||EB1, C-terminal domain superfamily||Microtubule-associated protein RP/EB
ENSMUSG00000027509	1336.23	1106.3	0.27242	0.0050697	0.040503	Rae1	WD40-repeat-containing domain superfamily||WD40 repeat, conserved site||WD40 repeat||WD40-repeat-containing domain||G-protein beta WD-40 repeat||WD40/YVTN repeat-like-containing domain superfamily
ENSMUSG00000027514	67.3598	6.17357	3.4477	0.00019489	0.0024677	Zbp1	Winged helix-like DNA-binding domain superfamily||Double-stranded RNA-specific adenosine deaminase (DRADA)||Winged helix DNA-binding domain superfamily||RHIM domain
ENSMUSG00000027517	76.6659	161.427	-1.0742	0.0052824	0.041817	Ankrd60	Ubiquitin domain||Ankyrin repeat-containing domain||Ankyrin repeat||Ubiquitin-like domain superfamily||Ankyrin repeat-containing domain superfamily
ENSMUSG00000027520	1283.61	1044.22	0.29777	0.0064449	0.048992	Zdbf2	-
ENSMUSG00000027524	58.1076	140.361	-1.2723	0.0060772	0.046774	Edn3	Endothelin-like toxin||Endothelin||Endothelin-like toxin, conserved site
ENSMUSG00000027540	2953.27	1633.13	0.85467	5.1673e-21	4.486e-19	Ptpn1	Tyrosine specific protein phosphatases domain||PTP type protein phosphatase||Protein-tyrosine phosphatase, active site||Protein-tyrosine phosphatase-like||Protein-tyrosine phosphatase, non-receptor type-1/2||Protein-tyrosine phosphatase, catalytic
ENSMUSG00000027550	1017.36	1287.8	-0.34008	0.00067346	0.0072664	Lrrcc1	Leucine-rich repeat domain superfamily||-||Leucine-rich repeat
ENSMUSG00000027552	451.634	334.18	0.43453	0.0015843	0.01507	E2f5	E2F-DP heterodimerization region||Winged helix DNA-binding domain superfamily||E2F transcription factor, CC-MB domain||E2F Family||Winged helix-like DNA-binding domain superfamily||Transcription factor E2F5||E2F/DP family, winged-helix DNA-binding domain
ENSMUSG00000027555	314.936	201.215	0.64632	0.0001449	0.0018928	Car13	Carbonic anhydrase, alpha-class, conserved site||Alpha carbonic anhydrase||Alpha carbonic anhydrase superfamily||Carbonic anhydrase, alpha-class
ENSMUSG00000027560	1330.56	941.682	0.49872	1.749e-06	3.4612e-05	Dok5	IRS-type PTB domain||PH-like domain superfamily||Pleckstrin homology domain
ENSMUSG00000027562	10147.1	16859.7	-0.73251	1.0242e-07	2.5256e-06	Car2	Carbonic anhydrase, alpha-class, conserved site||Alpha carbonic anhydrase||Alpha carbonic anhydrase superfamily||Carbonic anhydrase, alpha-class
ENSMUSG00000027580	612.585	146.852	2.0606	3.0027e-35	5.2405e-33	Helz2	Zinc finger C2H2 superfamily||Helicase with zinc finger domain 2||P-loop containing nucleoside triphosphate hydrolase||AAA+ ATPase domain||Nucleic acid-binding, OB-fold
ENSMUSG00000027582	1644.35	2095.09	-0.3495	0.00022361	0.0027815	Zgpat	G-patch domain||Zinc finger, CCCH-type superfamily||-||Zinc finger, CCCH-type
ENSMUSG00000027605	3674.24	4317.54	-0.23276	0.0061851	0.047357	Acss2	-||Acetyl-coenzyme A synthetase, N-terminal domain||AMP-binding enzyme, C-terminal domain||Acetate-CoA ligase||AMP-binding, conserved site||AMP-dependent synthetase/ligase
ENSMUSG00000027610	1151.08	1488.65	-0.37102	0.0002498	0.0030666	Gss	Glutathione synthase, C-terminal, eukaryotic||Glutathione synthase, substrate-binding domain superfamily||Glutathione synthase, substrate-binding domain||Glutathione synthase, N-terminal, eukaryotic||Glutathione synthase, alpha-helical, eukaryotic||Glutathione synthase||Pre-ATP-grasp domain superfamily
ENSMUSG00000027611	321.345	37.9408	3.0823	8.8486e-14	4.4188e-12	Procr	MHC classes I/II-like antigen recognition protein||MHC class I-like antigen recognition-like||MHC class I-like antigen recognition-like superfamily||Endothelial protein C receptor
ENSMUSG00000027613	4552.75	3033.33	0.58584	4.0119e-12	1.6895e-10	Eif6	-||Translation initiation factor IF6
ENSMUSG00000027637	1105.44	882.522	0.32492	0.0021006	0.019186	1110008F13Rik	Rab5-interacting protein family||Rab5-interacting protein
ENSMUSG00000027639	1080.37	808.544	0.41813	5.4427e-05	0.0007835	Samhd1	Sterile alpha motif/pointed domain superfamily||HD domain||-||HD/PDEase domain||Sterile alpha motif domain
ENSMUSG00000027641	84.5335	138.187	-0.70903	0.0024605	0.022022	Rbl1	Retinoblastoma-associated protein, N-terminal||Cyclin-like superfamily||Retinoblastoma-associated protein, A-box||Cyclin-like||Retinoblastoma protein family||Retinoblastoma-associated protein, C-terminal||Retinoblastoma-like protein 1||Retinoblastoma-associated protein, B-box
ENSMUSG00000027651	1329.13	1101.56	0.27093	0.0064132	0.048784	Rprd1b	ENTH/VHS||RNA polymerase II-binding domain||Cell-cycle alteration and expression-elevated protein in tumour||CID domain
ENSMUSG00000027654	342.853	76.0608	2.1724	1.0318e-30	1.4741e-28	Fam83d	FAM83
ENSMUSG00000027660	2126.38	1683.05	0.33732	0.00031011	0.0037233	Skil	c-SKI SMAD4-binding domain||Putative DNA-binding domain superfamily||SAND-like domain superfamily||Ski-related oncogene Sno||Ski-like, DNA-binding domain superfamily||Transcription regulator SKI/SnoN||SKI/SNO/DAC domain
ENSMUSG00000027661	190.136	90.1396	1.0768	0.0025022	0.022292	Slc2a10	MFS transporter superfamily||Major facilitator, sugar transporter-like||Sugar/inositol transporter||Sugar transporter, conserved site||Major facilitator superfamily domain
ENSMUSG00000027669	1181.12	1493.35	-0.33839	0.00080607	0.0084784	Gnb4	-||G-protein, beta subunit||WD40/YVTN repeat-like-containing domain superfamily||WD40-repeat-containing domain||WD40 repeat, conserved site||WD40 repeat||WD40-repeat-containing domain superfamily||G-protein beta WD-40 repeat||Guanine nucleotide-binding protein, beta subunit||Six-bladed beta-propeller, TolB-like
ENSMUSG00000027676	364.856	537.817	-0.55979	0.00016232	0.0020993	Ccdc39	Coiled-coil domain-containing protein 39||Heat shock protein 70kD, C-terminal domain superfamily
ENSMUSG00000027677	2576.56	3723.54	-0.53123	1.5927e-09	5.0116e-08	Ttc14	Nucleic acid-binding, OB-fold||-||Tetratricopeptide-like helical domain superfamily||S1 domain||Tetratricopeptide repeat||Tetratricopeptide repeat-containing domain
ENSMUSG00000027684	174.692	113.205	0.62587	0.0021006	0.019186	Mecom	Zinc finger, RING/FYVE/PHD-type||SET domain||Zinc finger C2H2-type||Mds1 and Evi1 complex locus protein Evi1||-||Zinc finger C2H2 superfamily||MDS1-EVI1 complex locus protein MDS1
ENSMUSG00000027722	618.529	385.428	0.68238	1.3624e-07	3.2949e-06	Spata5	ATPase, AAA-type, conserved site||Aspartate decarboxylase-like domain superfamily||CDC48, N-terminal subdomain||P-loop containing nucleoside triphosphate hydrolase||AAA+ ATPase domain||ATPase, AAA-type, core||CDC48 domain 2-like superfamily
ENSMUSG00000027744	7.89133	41.4946	-2.3946	0.00029046	0.003506	Stoml3	Stomatin family||Band 7 domain||Band 7/stomatin-like, conserved site||Stomatin-like protein 3||Band 7/SPFH domain superfamily
ENSMUSG00000027746	3203.54	2668.11	0.26384	0.0025795	0.022827	Ufm1	-||Ubiquitin-fold modifier 1||Ubiquitin-like domain superfamily
ENSMUSG00000027750	119.371	54.8687	1.1214	2.5958e-05	0.00040408	Postn	-||FAS1 domain superfamily||FAS1 domain||EMI domain||TGF beta-induced protein/periostin
ENSMUSG00000027765	359.662	586.009	-0.70428	1.7118e-05	0.00027678	P2ry1	G protein-coupled receptor, rhodopsin-like||P2Y purinoceptor 1||GPCR, rhodopsin-like, 7TM
ENSMUSG00000027782	4274.66	3288.24	0.37849	1.2055e-05	0.00020216	Kpna4	Armadillo||Atypical Arm repeat||Importin subunit alpha||Importin-alpha, importin-beta-binding domain||Armadillo-like helical||Armadillo-type fold
ENSMUSG00000027787	1116.33	805.659	0.47052	1.6495e-05	0.00026773	Nmd3	-||NMD3
ENSMUSG00000027790	2.63747	18.2834	-2.7933	0.00095299	0.0097658	Sis	P-type trefoil, conserved site||P-type trefoil domain||Galactose mutarotase-like domain superfamily||Glycoside hydrolase superfamily||Glycosyl hydrolases family 31, active site||Glycoside hydrolase family 31||Galactose mutarotase, N-terminal barrel||Glycoside hydrolase family 31, N-terminal domain||Glycosyl hydrolases family 31, conserved site
ENSMUSG00000027792	242.939	450.328	-0.89038	1.229e-09	3.9257e-08	Bche	Carboxylesterase, type B||Alpha/Beta hydrolase fold||Carboxylesterase type B, conserved site||Acetylcholinesterase, tetramerisation domain||Carboxylesterase type B, active site||Cholinesterase
ENSMUSG00000027796	1589.61	1901.76	-0.25867	0.0051755	0.041183	Smad9	Dwarfin||SMAD domain, Dwarfin-type||SMAD MH1 domain superfamily||SMAD/FHA domain superfamily||MAD homology 1, Dwarfin-type||SMAD-like domain superfamily||MAD homology, MH1
ENSMUSG00000027797	13239.7	11149.4	0.2479	0.0021872	0.019889	Dclk1	-||Protein kinase, ATP binding site||Protein kinase domain||Neuronal migration protein doublecortin, chordata||Protein kinase-like domain superfamily||Doublecortin domain||Doublecortin domain superfamily||Serine/threonine-protein kinase, active site
ENSMUSG00000027800	6061.89	573.507	3.4019	2.4228e-32	3.7118e-30	Tm4sf1	L6 membrane
ENSMUSG00000027803	1974.72	795.246	1.3122	7.5603e-32	1.1277e-29	Wwtr1	WW domain||WW domain superfamily
ENSMUSG00000027808	3010.77	1970.23	0.61177	5.1262e-12	2.1244e-10	Serp1	Stress-associated endoplasmic reticulum protein
ENSMUSG00000027828	6536.33	4708.85	0.47311	5.5746e-09	1.66e-07	Ssr3	Translocon-associated protein subunit gamma
ENSMUSG00000027829	1191.93	955.59	0.31884	0.0014513	0.013967	Ccnl1	-||Cyclin, N-terminal||Cyclin L1||Cyclin-like||Cyclin, C-terminal domain||Cyclin-like superfamily
ENSMUSG00000027832	2113.47	72.3076	4.8693	9.2546e-58	3.7303e-55	Ptx3	Concanavalin A-like lectin/glucanase domain superfamily||Pentraxin-related||Pentaxin, conserved site
ENSMUSG00000027845	459.208	217.497	1.0782	6.8894e-13	3.191e-11	Dclre1b	Metallo-hydrolase/oxidoreductase superfamily||DNA repair metallo-beta-lactamase||Metallo-beta-lactamase||-
ENSMUSG00000027849	1911.31	1194.52	0.67814	2.3048e-08	6.3157e-07	Syt6	Synaptotagmin-6||-||Synaptotagmin||C2 domain superfamily||C2 domain
ENSMUSG00000027852	2933.77	1799.87	0.70486	4.4791e-15	2.5233e-13	Nras	P-loop containing nucleoside triphosphate hydrolase||Small GTPase superfamily, Ras type||-||Small GTP-binding protein domain||Small GTPase superfamily
ENSMUSG00000027859	426.294	36.2494	3.5558	9.4142e-05	0.0012905	Ngf	Nerve growth factor, beta subunit, mammalian||Nerve growth factor-related||Nerve growth factor, beta subunit||Nerve growth factor-like||Cystine-knot cytokine||-||Nerve growth factor conserved site
ENSMUSG00000027864	3084.14	1872.98	0.71953	1.1213e-14	6.133e-13	Ptgfrn	Immunoglobulin-like fold||Immunoglobulin subtype||Immunoglobulin V-set domain||Immunoglobulin-like domain superfamily||Immunoglobulin-like domain
ENSMUSG00000027875	124.47	57.3654	1.1176	0.00055781	0.0061579	Hmgcs2	Hydroxymethylglutaryl-CoA synthase, eukaryotic||Hydroxymethylglutaryl-coenzyme A synthase, N-terminal||Hydroxymethylglutaryl-coenzyme A synthase, active site||Hydroxymethylglutaryl-coenzyme A synthase C-terminal domain||Thiolase-like
ENSMUSG00000027881	2421.37	1788.78	0.43685	1.4068e-06	2.8454e-05	Prpf38b	-||Pre-mRNA-splicing factor 38
ENSMUSG00000027882	3345.84	2035.83	0.71676	3.558e-07	7.9991e-06	Stxbp3	Sec1-like protein||Sec1-like superfamily
ENSMUSG00000027895	4962.32	6115.35	-0.30142	0.00070345	0.0075419	Kcnc4	Potassium channel, voltage dependent, Kv3, inactivation domain||BTB/POZ domain||Potassium channel, voltage dependent, Kv||Ion transport domain||SKP1/BTB/POZ domain superfamily||Potassium channel, voltage dependent, Kv3.4||Potassium channel tetramerisation-type BTB domain||Voltage-gated potassium channel||Potassium channel, voltage dependent, Kv3
ENSMUSG00000027896	68.9137	121.352	-0.81633	0.00090436	0.0093353	Slc16a4	Major facilitator superfamily domain||Major facilitator superfamily||MFS transporter superfamily
ENSMUSG00000027907	1276.24	225.738	2.4992	8.5236e-22	7.7579e-20	S100a11	EF-hand domain pair||EF-Hand 1, calcium-binding site||Protein S100-A11||EF-hand domain||S100/CaBP-9k-type, calcium binding, subdomain||S100/Calbindin-D9k, conserved site
ENSMUSG00000027913	56.9067	13.8974	2.0338	1.6854e-06	3.3567e-05	Crct1	Cysteine-rich C-terminal protein 1
ENSMUSG00000027919	12.8688	0	Inf	3.2177e-05	0.00048904	Lce1g	Late cornified envelope protein||Small proline-rich protein/late cornified envelope protein
ENSMUSG00000027937	1242.53	986.223	0.33329	0.0015885	0.015103	Jtb	Jumping translocation breakpoint
ENSMUSG00000027940	7143.06	4309.61	0.72898	6.5471e-19	4.937e-17	Tpm3	Tropomyosin||-
ENSMUSG00000027947	968.477	218.133	2.1505	2.2756e-62	1.0412e-59	Il6ra	Fibronectin type III superfamily||Type I cytokine receptor, cytokine-binding domain||Immunoglobulin-like domain superfamily||Immunoglobulin||Immunoglobulin subtype||Fibronectin type III||Immunoglobulin-like fold||Immunoglobulin subtype 2||Immunoglobulin-like domain||Long hematopoietin receptor, soluble alpha chain, conserved site
ENSMUSG00000027952	2179.4	1630.09	0.41898	4.281e-06	7.8818e-05	Pmvk	Higher eukaryotic phosphomevalonate kinase||P-loop containing nucleoside triphosphate hydrolase
ENSMUSG00000027953	1381.42	1876.25	-0.4417	0.00033328	0.0039677	Slc50a1	SWEET sugar transporter||-
ENSMUSG00000027954	235.948	141.732	0.7353	6.1317e-05	0.00087193	Efna1	Ephrin||Ephrin, conserved site||Ephrin-A ectodomain||Cupredoxin||Ephrin receptor-binding domain
ENSMUSG00000027956	569.127	711.828	-0.32278	0.0057607	0.044735	Tmem144	TMEM144||-||Sugar transport protein
ENSMUSG00000027966	1157.65	2491.79	-1.106	1.0905e-12	4.9054e-11	Col11a1	Laminin G domain||-||Insect cysteine-rich antifreeze protein||Collagen triple helix repeat||Fibrinogen, alpha/beta/gamma chain, C-terminal globular, subdomain 1||Fibrillar collagen, C-terminal||Concanavalin A-like lectin/glucanase domain superfamily
ENSMUSG00000027968	866.909	688.541	0.33234	0.003107	0.026727	Larp7	La-related protein 7, La domain||La protein, RNA-binding domain||Winged helix-like DNA-binding domain superfamily||LARP7, RNA recognition motif 1||Winged helix DNA-binding domain superfamily||RNA-binding domain superfamily||La-type HTH domain||RNA recognition motif domain||LARP7, RNA recognition motif 2||Lupus La protein
ENSMUSG00000027981	893.551	1126.47	-0.33419	0.0011336	0.011365	Rnpc3	RNA-binding domain superfamily||RBM40, RNA recognition motif 1||RNA recognition motif domain
ENSMUSG00000027985	136.891	28.8066	2.2486	1.049e-07	2.5831e-06	Lef1	Lymphoid enhancer-binding factor 1||Transcription factor TCF/LEF||CTNNB1 binding, N-teminal||High mobility group box domain||Catenin binding domain superfamily||High mobility group box domain superfamily
ENSMUSG00000027995	633.349	178.892	1.8239	2.4411e-12	1.0502e-10	Tlr2	Leucine-rich repeat||Toll/interleukin-1 receptor homology (TIR) domain superfamily||Toll-like receptor 2||Toll/interleukin-1 receptor homology (TIR) domain||Leucine-rich repeat, typical subtype||Leucine-rich repeat domain superfamily||Cysteine-rich flanking region, C-terminal
ENSMUSG00000028001	860.214	0	Inf	2.7799e-46	7.4113e-44	Fga	Fibrinogen alpha C domain||Fibrinogen, alpha/beta/gamma chain, C-terminal globular, subdomain 2||Fibrinogen, alpha/beta/gamma chain, coiled coil domain||Fibrinogen, alpha/beta/gamma chain, C-terminal globular domain||Fibrinogen, conserved site||Fibrinogen-like, C-terminal||Fibrinogen, alpha/beta/gamma chain, C-terminal globular, subdomain 1||Fibrinogen alpha chain
ENSMUSG00000028010	888.508	559.961	0.66606	5.2754e-09	1.5779e-07	Gar1	H/ACA ribonucleoprotein complex, subunit Gar1||H/ACA ribonucleoprotein complex, subunit Gar1/Naf1||Translation protein, beta-barrel domain superfamily
ENSMUSG00000028017	70.4593	131.749	-0.90293	0.00024877	0.0030551	Egf	Pro-epidermal growth factor||EGF-like calcium-binding domain||EGF-like domain||Six-bladed beta-propeller, TolB-like||EGF-like, conserved site||LDLR class B repeat||EGF-type aspartate/asparagine hydroxylation site||EGF-like calcium-binding, conserved site||-||Growth factor receptor cysteine-rich domain superfamily
ENSMUSG00000028028	285.942	167.162	0.77447	6.0375e-06	0.00010766	Alpk1	-||Protein kinase-like domain superfamily||MHCK/EF2 kinase
ENSMUSG00000028034	4483.85	3649.18	0.29717	0.00046578	0.005278	Fubp1	Far upstream element-binding protein, C-terminal||K Homology domain, type 1 superfamily||K Homology domain, type 1||K Homology domain||K homology domain-like, alpha/beta||-
ENSMUSG00000028035	3099.13	2353.17	0.39726	4.3223e-05	0.00063822	Dnajb4	HSP40/DnaJ peptide-binding||DnaJ domain||DnaJ domain, conserved site||-||Chaperone DnaJ, C-terminal||DnaJ domain superfamily
ENSMUSG00000028037	47.308	17.4147	1.4418	0.0018914	0.017528	Ifi44	Interferon-induced protein 44 family||TLDc domain||P-loop containing nucleoside triphosphate hydrolase
ENSMUSG00000028039	2172.95	2615.24	-0.26729	0.0026858	0.023614	Efna3	Ephrin-A ectodomain||Ephrin receptor-binding domain||Cupredoxin||Ephrin, conserved site||Ephrin
ENSMUSG00000028041	4425.59	3625.95	0.28751	0.0004437	0.0050633	Adam15	Reprolysin domain, adamalysin-type||Disintegrin domain superfamily||Disintegrin domain||EGF-like, conserved site||Peptidase M12B, ADAM/reprolysin||EGF-like domain||Metallopeptidase, catalytic domain superfamily||ADAM, cysteine-rich||Peptidase M12B, propeptide||ADAM15 peptidase||-
ENSMUSG00000028042	4177.03	3017.61	0.46907	2.6145e-08	7.1044e-07	Zbtb7b	SKP1/BTB/POZ domain superfamily||-||Zinc finger C2H2-type||Zinc finger, RING/FYVE/PHD-type||Zinc finger C2H2 superfamily||BTB/POZ domain
ENSMUSG00000028057	1362.37	1108.04	0.29812	0.0022771	0.020626	Rit1	Small GTPase superfamily, Ras type||-||P-loop containing nucleoside triphosphate hydrolase||Small GTPase superfamily||Small GTP-binding protein domain
ENSMUSG00000028063	4788.69	2198.39	1.1232	6.4467e-33	1.0248e-30	Lmna	Lamin tail domain||Lamin tail domain superfamily||Intermediate filament protein||Intermediate filament protein, conserved site
ENSMUSG00000028069	1717.38	1086.06	0.6611	1.1356e-11	4.5286e-10	Gpatch4	G-patch domain
ENSMUSG00000028073	364.21	156.964	1.2143	3.691e-05	0.00055174	Pear1	EGF-like, conserved site||EMI domain||EGF-like domain||Growth factor receptor cysteine-rich domain superfamily||-||Laminin EGF domain
ENSMUSG00000028093	465.956	692.6	-0.57183	4.1997e-06	7.7364e-05	Acp6	Histidine phosphatase superfamily||Histidine acid phosphatase active site||Histidine phosphatase superfamily, clade-2
ENSMUSG00000028101	846.43	1051.89	-0.31352	0.0043763	0.035705	Pias3	Zinc finger, MIZ-type||SAP domain superfamily||E3 SUMO-protein ligase PIAS3||SAP domain||-||PINIT domain
ENSMUSG00000028108	736.284	304.335	1.2746	0.00013148	0.0017321	Ecm1	Extracellular matrix protein 1||Serum albumin-like
ENSMUSG00000028114	1281.5	1038.91	0.30275	0.0041711	0.034295	Mettl14	MT-A70-like||S-adenosyl-L-methionine-dependent methyltransferase
ENSMUSG00000028121	264.899	411.419	-0.63516	1.1689e-05	0.0001964	Bcar3	Ras guanine-nucleotide exchange factor catalytic domain superfamily||Ras guanine nucleotide exchange factor domain superfamily||SH2 domain superfamily||Breast cancer anti-estrogen resistance protein 3||Ras guanine-nucleotide exchange factors catalytic domain||SH2 domain
ENSMUSG00000028124	4868.79	3859.22	0.33525	6.8165e-05	0.00095845	Gclm	Glutamate--cysteine ligase regulatory subunit||NADP-dependent oxidoreductase domain||NADP-dependent oxidoreductase domain superfamily
ENSMUSG00000028126	1243.78	983.351	0.33895	0.00067987	0.0073286	Pip5k1a	Phosphatidylinositol-4-phosphate 5-kinase||Phosphatidylinositol-4-phosphate 5-kinase, core||Phosphatidylinositol-4-phosphate 5-kinase, C-terminal||Phosphatidylinositol-4-phosphate 5-kinase, N-terminal
ENSMUSG00000028128	2206.58	1537.56	0.52117	0.00016308	0.0021075	F3	Interferon/interleukin receptor domain||Fibronectin type III superfamily||Tissue factor||Tissue factor, conserved site||Immunoglobulin-like fold||Fibronectin type III
ENSMUSG00000028133	178.71	284.749	-0.67208	6.434e-05	0.00091147	Rwdd3	RWD domain||Ubiquitin-conjugating enzyme/RWD-like||-
ENSMUSG00000028139	39.0109	77.5595	-0.99143	0.0018646	0.017325	Riiad1	cAMP-dependent protein kinase regulatory subunit, dimerization-anchoring domain superfamily
ENSMUSG00000028152	4257.23	3514.26	0.2767	0.00087172	0.009038	Tspan5	Tetraspanin, EC2 domain superfamily||-||Tetraspanin, conserved site||Tetraspanin||Tetraspanin/Peripherin
ENSMUSG00000028156	5483.72	4118.36	0.41308	8.4982e-07	1.7972e-05	Eif4e	Eukaryotic translation initiation factor 4E (eIF-4E), conserved site||Translation Initiation factor eIF- 4e-like||Translation Initiation factor eIF- 4e
ENSMUSG00000028163	1679.11	1195.12	0.49053	2.8488e-07	6.5171e-06	Nfkb1	Rel homology domain, conserved site||Immunoglobulin E-set||NFkappaB IPT domain||Death domain||Rel homology dimerisation domain||NF-kappa-B/Dorsal||Nuclear factor NF-kappa-B, p105 subunit||p53-like transcription factor, DNA-binding||Ankyrin repeat-containing domain||Rel homology domain (RHD), DNA-binding domain superfamily||Rel homology domain (RHD), DNA-binding domain||-||IPT domain||Ankyrin repe…
ENSMUSG00000028173	1135.9	1652.23	-0.54057	1.5014e-06	3.0222e-05	Wls	Protein wntless||-
ENSMUSG00000028180	5710.2	7777.7	-0.4458	2.334e-08	6.3884e-07	Zranb2	Zinc finger, RanBP2-type||Uncharacterised conserved protein UCP037956, zinc finger Ran-binding||Zinc finger, RanBP2-type superfamily||-
ENSMUSG00000028187	561.982	410.273	0.45394	0.00043	0.0049285	Rpf1	Anticodon-binding domain superfamily||Brix domain
ENSMUSG00000028191	963.699	554.873	0.79643	2.5709e-12	1.1018e-10	Bcl10	B-cell lymphoma/leukemia 10/E10||Death-like domain superfamily||CARD domain
ENSMUSG00000028194	4751.53	4039.97	0.23405	0.0060726	0.04675	Ddah1	N(G),N(G)-dimethylarginine dimethylaminohydrolase 1||Dimethylarginine dimethylaminohydrolase/arginine deiminase
ENSMUSG00000028195	3666.84	219.315	4.0635	3.0266e-301	5.1237e-297	Cyr61	Thrombospondin type-1 (TSP1) repeat superfamily||Glycoprotein hormone subunit beta||VWFC domain||Insulin-like growth factor binding protein, N-terminal, Cys-rich conserved site||Thrombospondin type-1 (TSP1) repeat||IGFBP-related, CNN||Cystine knot, C-terminal||Insulin-like growth factor-binding protein, IGFBP||Growth factor receptor cysteine-rich domain superfamily
ENSMUSG00000028197	142.974	386.955	-1.4364	5.7685e-10	1.9357e-08	Col24a1	Fibrillar collagen, C-terminal||Concanavalin A-like lectin/glucanase domain superfamily||Collagen triple helix repeat||-||Insect cysteine-rich antifreeze protein||Laminin G domain
ENSMUSG00000028214	433.238	297.838	0.54063	0.0001802	0.0022954	Gem	Small GTP-binding protein domain||Small GTPase superfamily||P-loop containing nucleoside triphosphate hydrolase||Ras-related small G protein, RGK family||Small GTPase superfamily, Ras type
ENSMUSG00000028229	304.182	426.37	-0.48717	0.00061473	0.0066962	Rmdn1	Tetratricopeptide-like helical domain superfamily
ENSMUSG00000028232	804.941	631.27	0.35063	0.002805	0.024496	Tmem68	-||Phospholipid/glycerol acyltransferase
ENSMUSG00000028233	1267.83	1015.77	0.31979	0.001797	0.016752	Tgs1	S-adenosyl-L-methionine-dependent methyltransferase||RNA cap guanine-N2 methyltransferase
ENSMUSG00000028238	11.1228	0	Inf	0.00014837	0.0019344	Atp6v0d2	V-type ATP synthase subunit C-like||ATPase, V0 complex, subunit d||V-type ATPase subunit c||ATPase, V0 complex, c/d subunit
ENSMUSG00000028245	1793.72	2326.18	-0.37501	3.0682e-05	0.00046963	Nsmaf	WD40 repeat||WD40-repeat-containing domain superfamily||PH-like domain superfamily||PH-BEACH domain||-||BEACH domain superfamily||WD40/YVTN repeat-like-containing domain superfamily||WD40-repeat-containing domain||GRAM domain||BEACH domain
ENSMUSG00000028248	4761.74	7549.82	-0.66495	1.4126e-10	5.0664e-09	Pnisr	PNN-interacting serine/arginine-rich protein||-
ENSMUSG00000028249	8939.92	7137.51	0.32484	5.7827e-05	0.00082577	Sdcbp	PDZ domain||PDZ superfamily||Syntenin-1
ENSMUSG00000028268	598.275	171.512	1.8025	7.3162e-20	5.9261e-18	Gbp3	Guanylate-binding protein, N-terminal||P-loop containing nucleoside triphosphate hydrolase||Guanylate-binding protein, C-terminal||Guanylate-binding protein, C-terminal domain superfamily||GB1/RHD3-type guanine nucleotide-binding (G) domain
ENSMUSG00000028270	912.958	102.96	3.1485	2.6772e-57	1.0664e-54	Gbp2	GB1/RHD3-type guanine nucleotide-binding (G) domain||Guanylate-binding protein, C-terminal domain superfamily||-||Guanylate-binding protein, C-terminal||P-loop containing nucleoside triphosphate hydrolase||Guanylate-binding protein, N-terminal
ENSMUSG00000028291	1885.07	1523.82	0.30692	0.00164	0.015524	Akirin2	Akirin
ENSMUSG00000028318	572.672	390.551	0.5522	2.5204e-05	0.00039343	Polr1e	RNA polymerase I associated factor, A49-like
ENSMUSG00000028322	721.527	518.944	0.47547	6.0693e-05	0.00086378	Exosc3	Rrp40, S1 domain||K Homology domain, type 1 superfamily||Exosome complex RNA-binding protein 1/RRP40/RRP4||K Homology domain, type 1||Nucleic acid-binding, OB-fold
ENSMUSG00000028330	2502.42	1619.74	0.62756	1.1427e-11	4.5516e-10	Ncbp1	MIF4G-like, type 2||MIF4G-like, type 3||MIF4G-like, type 1||Nuclear cap-binding protein subunit 1||Armadillo-type fold
ENSMUSG00000028333	4391.16	2855.84	0.62069	3.0836e-13	1.4705e-11	Anp32b	Leucine-rich repeat||Leucine-rich repeat domain superfamily||U2A'/phosphoprotein 32 family A, C-terminal
ENSMUSG00000028339	353.574	595.376	-0.75179	0.0006377	0.0069136	Col15a1	Laminin G domain||Insect cysteine-rich antifreeze protein||C-type lectin fold||C-type lectin-like/link domain superfamily||Collagen triple helix repeat||Collagenase NC10/endostatin||Concanavalin A-like lectin/glucanase domain superfamily
ENSMUSG00000028341	233.227	78.5823	1.5695	2.1477e-07	5.0323e-06	Nr4a3	Nuclear hormone receptor, ligand-binding domain||Zinc finger, nuclear hormone receptor-type||Orphan nuclear receptor, NOR1 type||Nuclear hormone receptor-like domain superfamily||Zinc finger, NHR/GATA-type||Orphan nuclear receptor||Nuclear hormone receptor
ENSMUSG00000028347	2611.38	4679.63	-0.84158	6.1205e-16	3.7541e-14	Tmeff1	Kazal domain superfamily||Kazal domain||EGF-like, conserved site||EGF-like domain
ENSMUSG00000028354	2187.44	3056.42	-0.4826	3.4381e-08	9.1301e-07	Fmn2	Formin homology family, Cappuccino subfamily||Formin, FH2 domain||Formin Homology 1
ENSMUSG00000028362	48.9797	5.73543	3.0942	1.5207e-05	0.00024922	Tnfsf8	Tumour necrosis factor, conserved site||Tumour necrosis factor domain||Tumour necrosis factor-like domain superfamily||Tumour necrosis factor family protein, CD30 ligand type
ENSMUSG00000028364	2863.61	308.124	3.2163	1.6304e-22	1.5419e-20	Tnc	Fibrinogen-like, C-terminal||EGF-like domain, extracellular||Fibrinogen, alpha/beta/gamma chain, C-terminal globular, subdomain 1||Immunoglobulin-like fold||EGF-like, conserved site||Fibronectin type III||EGF-like domain||Fibrinogen, alpha/beta/gamma chain, C-terminal globular, subdomain 2||Tenascin-C||Fibronectin type III superfamily||Fibrinogen, alpha/beta/gamma chain, C-terminal globular domain
ENSMUSG00000028367	3243.42	2253.69	0.52522	4.8967e-09	1.4685e-07	Txn1	Thioredoxin-like superfamily||Thioredoxin||Thioredoxin, conserved site||Thioredoxin domain
ENSMUSG00000028382	1765.33	696.428	1.3419	7.7027e-40	1.63e-37	Ptbp3	-||RNA-binding domain superfamily||Polypyrimidine tract-binding protein1/2/3, RNA recognition motif 2||ROD1, RNA recognition motif 1||HnRNP-L/PTB||ROD1, RNA recognition motif 4||RNA recognition motif domain
ENSMUSG00000028399	7682.85	12496.2	-0.70178	1.0893e-18	8.0884e-17	Ptprd	Immunoglobulin-like domain||Immunoglobulin I-set||Tyrosine specific protein phosphatases domain||-||Protein-tyrosine phosphatase-like||Immunoglobulin subtype||Fibronectin type III||Immunoglobulin-like fold||Protein-tyrosine phosphatase, catalytic||Immunoglobulin subtype 2||Fibronectin type III superfamily||Immunoglobulin-like domain superfamily||PTP type protein phosphatase||Protein-tyrosine phos…
ENSMUSG00000028413	538.048	174.63	1.6234	1.4893e-10	5.3135e-09	B4galt1	Galactosyltransferase, C-terminal||Beta-1,4-galactosyltransferase||Nucleotide-diphospho-sugar transferases||Galactosyltransferase, N-terminal
ENSMUSG00000028436	2382.57	1902.84	0.32436	0.00038994	0.0045369	Dcaf12	WD40/YVTN repeat-like-containing domain superfamily||WD40-repeat-containing domain||WD40-repeat-containing domain superfamily||WD40 repeat, conserved site||WD40 repeat
ENSMUSG00000028444	5159.27	6952.21	-0.43031	5.2081e-07	1.1436e-05	Cntfr	-||Immunoglobulin-like domain||Long hematopoietin receptor, soluble alpha chain, conserved site||Fibronectin type III superfamily||Immunoglobulin-like domain superfamily||Immunoglobulin subtype 2||Immunoglobulin-like fold||Immunoglobulin subtype||Fibronectin type III
ENSMUSG00000028445	4463.13	5581.5	-0.3226	0.0015574	0.014854	Enho	Adropin
ENSMUSG00000028453	394.603	543.841	-0.46278	0.00037661	0.0044031	Fancg	Tetratricopeptide repeat||Tetratricopeptide repeat-containing domain||Tetratricopeptide-like helical domain superfamily
ENSMUSG00000028459	100.08	22.3066	2.1656	7.5571e-11	2.7873e-09	Cd72	C-type lectin-like||C-type lectin-like/link domain superfamily||C-type lectin fold
ENSMUSG00000028465	5144.72	3873.9	0.4093	5.8997e-07	1.2829e-05	Tln1	Talin, central domain superfamily||FERM/acyl-CoA-binding protein superfamily||FERM superfamily, second domain||Ubiquitin-like domain superfamily||I/LWEQ domain superfamily||Vinculin-binding site-containing domain||Band 4.1 domain||FERM domain||Talin-1/2, rod-segment||Talin, N-terminal F0 domain||FERM, N-terminal||FERM conserved site||I/LWEQ domain||PH-like domain superfamily||FERM central domain|…
ENSMUSG00000028467	2775.89	3406.62	-0.29539	0.00090957	0.0093719	Gba2	Beta-glucosidase GBA2-type||Glycosyl-hydrolase family 116, N-terminal||Six-hairpin glycosidase-like||Glycosyl-hydrolase family 116, catalytic region
ENSMUSG00000028469	1965.33	2874.08	-0.54833	2.6065e-06	4.9972e-05	Npr2	Adenylyl cyclase class-4/guanylyl cyclase||Nucleotide cyclase||Periplasmic binding protein-like I||Receptor, ligand binding region||Adenylyl cyclase class-3/4/guanylyl cyclase||Adenylyl cyclase class-4/guanylyl cyclase, conserved site||Protein kinase domain||Serine-threonine/tyrosine-protein kinase, catalytic domain||Protein kinase-like domain superfamily
ENSMUSG00000028475	52.1463	19.0521	1.4526	0.00045692	0.0051861	Spaar	-
ENSMUSG00000028480	1352.5	274.955	2.2984	9.7788e-40	2.0312e-37	Glipr2	Ves allergen||CAP domain||Allergen V5/Tpx-1-related, conserved site||CAP superfamily||Cysteine-rich secretory protein, allergen V5/Tpx-1-related||Golgi-associated plant pathogenesis-related protein 1, SCP domain
ENSMUSG00000028494	1410.15	861.912	0.71023	3.7936e-06	7.0807e-05	Plin2	Perilipin
ENSMUSG00000028495	15489.8	11973.4	0.37149	9.3501e-05	0.0012822	Rps6	Ribosomal protein S6e, conserved site||Ribosomal protein S6, eukaryotic||Ribosomal protein S6e
ENSMUSG00000028514	4679.96	3334.73	0.48893	4.4923e-09	1.352e-07	Usp24	UBA-like superfamily||Ubiquitin-specific peptidase 24||Ubiquitin-associated domain||Ubiquitin specific protease domain||Armadillo-like helical||Peptidase C19, ubiquitin carboxyl-terminal hydrolase||Armadillo-type fold||Ubiquitin-like domain superfamily||Ubiquitin specific protease, conserved site
ENSMUSG00000028522	1360.81	1079.58	0.33399	0.00089907	0.0092921	Mier1	-||ELM2 domain||Homeobox-like domain superfamily||SANT domain||Mesoderm induction early response protein 1||SANT/Myb domain
ENSMUSG00000028525	6986.16	4297.13	0.70113	1.2207e-17	8.3662e-16	Pde4b	3'5'-cyclic nucleotide phosphodiesterase, catalytic domain superfamily||3'5'-cyclic nucleotide phosphodiesterase, catalytic domain||3'5'-cyclic nucleotide phosphodiesterase, conserved site||HD/PDEase domain||-||3'5'-cyclic nucleotide phosphodiesterase
ENSMUSG00000028528	6904.37	8717.61	-0.33642	2.1114e-05	0.00033436	Dnajc6	DnaJ domain||Tensin phosphatase, C2 domain||Protein-tyrosine phosphatase-like||DnaJ domain superfamily||C2 domain superfamily||Tensin-type phosphatase domain
ENSMUSG00000028532	1233.45	1537.34	-0.31774	0.0016871	0.015889	Cachd1	VWA N-terminal||von Willebrand factor, type A||von Willebrand factor A-like domain superfamily||Periplasmic sensor-like domain superfamily
ENSMUSG00000028540	683.556	462.812	0.56263	4.1034e-06	7.5837e-05	Dph2	Diphthamide synthesis DHP2, eukaryotes||Diphthamide synthesis DPH1/DPH2||-
ENSMUSG00000028542	6234.39	9782.87	-0.65001	1.1513e-15	6.9362e-14	Slc6a9	Sodium:neurotransmitter symporter superfamily||Sodium:neurotransmitter symporter||Sodium:neurotransmitter symporter, glycine, type 1||-
ENSMUSG00000028550	1258.36	1708.75	-0.44139	5.008e-06	9.1016e-05	Atg4c	Cysteine protease ATG4C||Peptidase C54
ENSMUSG00000028572	815.037	1076.19	-0.401	0.0018945	0.01754	Hook1	Hook-like protein family
ENSMUSG00000028577	2108.5	1741.19	0.27614	0.0038321	0.031942	Plaa	WD40-repeat-containing domain||PLAA/Doa1/Lub1||WD40/YVTN repeat-like-containing domain superfamily||PUL domain||WD40 repeat||WD40-repeat-containing domain superfamily||PLAA family ubiquitin binding, PFU
ENSMUSG00000028580	2153.84	1761.31	0.29026	0.0013855	0.013422	Pum1	Pumilio, RNA binding domain||Armadillo-like helical||Armadillo-type fold||Pumilio homology domain||Pumilio RNA-binding repeat||-
ENSMUSG00000028599	521.458	194.846	1.4202	3.1929e-22	2.9946e-20	Tnfrsf1b	-||TNFR/NGFR cysteine-rich region||Tumor necrosis factor receptor 1B, N-terminal||Tumour necrosis factor receptor 1B
ENSMUSG00000028607	956.77	704.107	0.44238	6.7282e-05	0.00094957	Cpt2	Acyltransferase ChoActase/COT/CPT
ENSMUSG00000028631	611.097	919.808	-0.58993	0.0043177	0.035311	Kcnq4	Ion transport domain||Potassium channel, voltage dependent, KCNQ, C-terminal||Potassium channel, voltage dependent, KCNQ4||Voltage-gated potassium channel||Potassium channel, voltage dependent, KCNQ
ENSMUSG00000028633	2777.48	2020.2	0.45928	1.4829e-07	3.5609e-06	Ctps	CTP synthase, N-terminal||P-loop containing nucleoside triphosphate hydrolase||CTP synthase||Class I glutamine amidotransferase-like||Glutamine amidotransferase||CTP synthase GATase domain
ENSMUSG00000028634	2443.4	1507.16	0.69706	2.7857e-14	1.451e-12	Hivep3	Zinc finger C2H2 superfamily||Zinc finger C2H2-type||Zinc finger CCHC HIVEP-type||-
ENSMUSG00000028639	7312.26	5348.66	0.45114	4.72e-07	1.0437e-05	Ybx1	-||Cold-shock conserved site||Cold shock domain||Cold-shock protein, DNA-binding||Nucleic acid-binding, OB-fold
ENSMUSG00000028645	12711.7	5527.82	1.2014	8.4011e-51	2.6096e-48	Slc2a1	Sugar transporter, conserved site||Major facilitator superfamily domain||-||Major facilitator, sugar transporter-like||Sugar/inositol transporter||MFS transporter superfamily||Glucose transporter, type 1 (GLUT1)
ENSMUSG00000028646	2456.74	2005.9	0.2925	0.0010031	0.010223	Rragc	-||P-loop containing nucleoside triphosphate hydrolase||Gtr1/RagA G protein
ENSMUSG00000028649	18827.6	21721.2	-0.20626	0.0064899	0.049257	Macf1	Calponin-like domain superfamily||Plakin repeat superfamily||Actinin-type actin-binding domain, conserved site||Spectrin repeat||Spectrin/alpha-actinin||EF-hand domain||Calponin homology domain||EF-hand domain pair||GAR domain superfamily||EF-Hand 1, calcium-binding site||Plectin||GAR domain||Plectin repeat
ENSMUSG00000028654	696.276	937.81	-0.42964	0.00011078	0.0014926	Mycl	Transcription regulator Myc, N-terminal||Helix-loop-helix DNA-binding domain superfamily||Transcription regulator Myc||Myc-type, basic helix-loop-helix (bHLH) domain
ENSMUSG00000028655	3259.9	1938.32	0.75002	6.9389e-12	2.8399e-10	Mfsd2a	MFS transporter superfamily||-
ENSMUSG00000028661	430.25	834.058	-0.95497	0.00059086	0.006468	Epha8	Ephrin receptor ligand binding domain||Sterile alpha motif domain||Tyrosine-protein kinase, active site||Fibronectin type III superfamily||Sterile alpha motif/pointed domain superfamily||Ephrin type-A receptor 8||Protein kinase-like domain superfamily||Tyrosine-protein kinase, receptor class V, conserved site||Protein kinase domain||Protein kinase, ATP binding site||Fibronectin type III||Immunogl…
ENSMUSG00000028668	1458.47	1152.75	0.33938	0.00048712	0.0054742	Eloa	Transcription factor IIS, N-terminal||RNA polymerase II transcription factor SIII, subunit A||TFIIS/LEDGF domain superfamily||F-box domain||Transcription elongation factor, TFIIS/CRSP70, N-terminal, sub-type
ENSMUSG00000028669	4123.86	3220.27	0.35681	3.5706e-05	0.00053634	Pithd1	PITH domain||PITH domain superfamily||Galactose-binding-like domain superfamily
ENSMUSG00000028670	5337.54	3991.15	0.41937	4.1419e-07	9.2505e-06	Lypla2	Phospholipase/carboxylesterase/thioesterase||Alpha/Beta hydrolase fold
ENSMUSG00000028676	2748.47	2139.49	0.36136	5.6235e-05	0.0008061	Srsf10	RNA-binding domain superfamily||Serine/arginine-rich splicing factor 10||RNA recognition motif domain
ENSMUSG00000028678	34.1346	5.85147	2.5444	0.00026272	0.0032031	Kif2c	-||P-loop containing nucleoside triphosphate hydrolase||Kinesin motor domain, conserved site||Kinesin-like protein||Kinesin motor domain superfamily||Kinesin motor domain
ENSMUSG00000028680	1153.58	884.026	0.38396	0.0056609	0.044183	Plk3	Protein kinase-like domain superfamily||Serine/threonine-protein kinase Plk3||First polo-box domain||Protein kinase, ATP binding site||POLO box domain superfamily||Protein kinase domain||POLO box domain||Second polo-box domain||Serine/threonine-protein kinase, active site
ENSMUSG00000028689	102.191	183.126	-0.84157	5.2484e-05	0.00076037	Ccdc163	-
ENSMUSG00000028709	388.613	281.188	0.4668	0.0016783	0.015815	Mob3c	MOB kinase activator family||MOB kinase activator superfamily
ENSMUSG00000028717	236.337	141.683	0.73817	5.3241e-05	0.00076937	Tal1	Helix-loop-helix DNA-binding domain superfamily||-||Myc-type, basic helix-loop-helix (bHLH) domain
ENSMUSG00000028729	2736.08	2008.69	0.44586	6.9343e-07	1.4869e-05	Ebna1bp2	Eukaryotic rRNA processing
ENSMUSG00000028741	1575.92	1071.68	0.55632	2.8118e-08	7.5738e-07	Mrto4	Ribosome assembly factor Mrt4||Ribosomal protein L10P
ENSMUSG00000028744	799.86	616.125	0.37652	0.0011177	0.01123	Pqlc2	-||PQ-loop repeat
ENSMUSG00000028763	2393.51	1323.8	0.85445	0.0056635	0.044183	Hspg2	EGF-like calcium-binding domain||Immunoglobulin subtype||Laminin IV||Immunoglobulin subtype 2||Low-density lipoprotein (LDL) receptor class A, conserved site||Laminin G domain||Immunoglobulin-like domain||Immunoglobulin-like domain superfamily||Laminin EGF domain||EGF-like domain||SEA domain||Immunoglobulin V-set domain||Immunoglobulin-like fold||Concanavalin A-like lectin/glucanase domain superf…
ENSMUSG00000028771	1952.08	806.852	1.2746	1.0364e-37	2.0402e-35	Ptpn12	-||PTP type protein phosphatase||Protein-tyrosine phosphatase, active site||Protein-tyrosine phosphatase-like||Tyrosine specific protein phosphatases domain||Protein-tyrosine phosphatase, non-receptor type-12||Protein-tyrosine phosphatase, catalytic
ENSMUSG00000028776	847.788	119.64	2.825	5.2372e-23	5.0519e-21	Tinagl1	Cysteine peptidase, histidine active site||Somatomedin B domain||-||Peptidase C1A||Peptidase C1A, papain C-terminal
ENSMUSG00000028782	7402.96	9442.53	-0.35107	0.0015691	0.014944	Adgrb2	GPCR, family 2, extracellular hormone receptor domain||GPCR, family 2-like||Thrombospondin type-1 (TSP1) repeat superfamily||GPS motif||GAIN domain, N-terminal||Thrombospondin type-1 (TSP1) repeat||GPCR, family 2, secretin-like||GPCR, family 2, brain-specific angiogenesis inhibitor
ENSMUSG00000028792	1397.96	939.074	0.57402	1.4272e-07	3.4393e-06	Ak2	Adenylate kinase, active site lid domain||P-loop containing nucleoside triphosphate hydrolase||Adenylate kinase subfamily||Adenylate kinase, conserved site||-||Adenylate kinase 2||Adenylate kinase/UMP-CMP kinase
ENSMUSG00000028793	4214.23	2735.57	0.62343	2.4538e-13	1.1869e-11	Rnf19b	E3 ubiquitin ligase RBR family||Zinc finger, RING/FYVE/PHD-type||Zinc finger, RING-type||IBR domain
ENSMUSG00000028801	17.3879	51.4924	-1.5663	0.00015353	0.001994	Stpg1	Sperm-tail PG-rich repeat
ENSMUSG00000028803	4712.06	6041.87	-0.35864	7.2357e-05	0.001014	Nipal3	Magnesium transporter NIPA||-
ENSMUSG00000028811	6489.81	5341.09	0.28104	0.00051237	0.0057103	Yars	Rossmann-like alpha/beta/alpha sandwich fold||Aminoacyl-tRNA synthetase, class Ic||tRNA-binding domain||Tyrosine-tRNA ligase||-||Nucleic acid-binding, OB-fold
ENSMUSG00000028820	6494.6	4374.94	0.56998	5.0803e-12	2.1105e-10	Sfpq	RNA-binding domain superfamily||PSF, NOPS domain||PSF, RNA recognition motif 1||NOPS||RNA recognition motif domain
ENSMUSG00000028837	2783.18	2248.22	0.30795	0.00061491	0.0066962	Psmb2	Proteasome subunit beta 2||Proteasome, subunit alpha/beta||Proteasome beta-type subunit, conserved site||Nucleophile aminohydrolases, N-terminal||Proteasome B-type subunit
ENSMUSG00000028859	393.983	184.055	1.098	5.6954e-05	0.00081468	Csf3r	Immunoglobulin-like fold||Long hematopoietin receptor, Gp130 family 2, conserved site||Fibronectin type III||Immunoglobulin C2-set-like, ligand-binding||Fibronectin type III superfamily||Immunoglobulin-like domain superfamily
ENSMUSG00000028860	38.7992	11.1275	1.8019	0.0003506	0.0041463	Sytl1	C2 domain||C2 domain superfamily||Rab-binding domain||Synaptotagmin-like protein 1
ENSMUSG00000028862	2525.9	129.135	4.2898	2.5566e-99	2.6231e-96	Map3k6	Protein kinase-like domain superfamily||Tetratricopeptide-like helical domain superfamily||Protein kinase, ATP binding site||Protein kinase domain||Sterile alpha motif/pointed domain superfamily||Serine/threonine-protein kinase, active site||Domain of unknown function DUF4071
ENSMUSG00000028864	100.674	37.4113	1.4281	1.0834e-06	2.2394e-05	Hgf	PAN/Apple domain||Kringle||Peptidase S1, PA clan||Kringle-like fold||Hepatocyte growth factor-like||Peptidase S1A, chymotrypsin family||Serine proteases, trypsin domain||Hepatocyte growth factor||Kringle, conserved site
ENSMUSG00000028868	2310.91	1850.07	0.32088	0.00036835	0.0043229	Wasf2	SCAR/WAVE family||WH2 domain
ENSMUSG00000028869	2485.68	1812.18	0.45592	6.4364e-07	1.388e-05	Gnl2	Circularly permuted (CP)-type guanine nucleotide-binding (G) domain||P-loop containing nucleoside triphosphate hydrolase||tRNA modification GTPase MnmE domain 2||GTP binding domain||Nucleolar GTP-binding protein 2||GTP-binding protein, orthogonal bundle domain superfamily||Nucleolar GTP-binding protein 2, N-terminal domain
ENSMUSG00000028874	183.146	45.8162	1.9991	3.6067e-16	2.2489e-14	Fgr	SH2 domain||Tyrosine-protein kinase Fgr, SH2 domain||Tyrosine-protein kinase, active site||SH2 domain superfamily||SH3-like domain superfamily||Protein kinase, ATP binding site||Tyrosine-protein kinase, catalytic domain||Protein kinase domain||Protein kinase-like domain superfamily||Serine-threonine/tyrosine-protein kinase, catalytic domain||SH3 domain
ENSMUSG00000028876	3160.07	4337.2	-0.45681	1.3874e-05	0.00022882	Epha10	Protein kinase-like domain superfamily||Serine-threonine/tyrosine-protein kinase, catalytic domain||Galactose-binding-like domain superfamily||Tyrosine-protein kinase, receptor class V, conserved site||Protein kinase domain||Sterile alpha motif/pointed domain superfamily||Ephrin receptor, transmembrane domain||Tyrosine-protein kinase ephrin type A/B receptor-like||Sterile alpha motif domain||Fibr…
ENSMUSG00000028889	609.881	386.692	0.65734	1.8848e-07	4.4564e-06	Yrdc	DHBP synthase RibB-like alpha/beta domain superfamily||YrdC-like domain
ENSMUSG00000028893	1446.05	1119.5	0.36927	0.00011981	0.0015983	Sesn2	AhpD-like||Sestrin
ENSMUSG00000028894	1359.9	1650.85	-0.27971	0.0035858	0.030238	Inpp5b	Immunoglobulin-like fold||Endonuclease/exonuclease/phosphatase||Endonuclease/exonuclease/phosphatase superfamily||Rho GTPase-activating protein domain||Type II inositol 1,4,5-trisphosphate 5-phosphatase, PH domain||Inositol polyphosphate-related phosphatase||Rho GTPase activation protein||-
ENSMUSG00000028896	783.625	487.12	0.68589	5.4472e-09	1.6249e-07	Rcc1	Regulator of chromosome condensation, RCC1||Regulator of chromosome condensation 1/beta-lactamase-inhibitor protein II
ENSMUSG00000028906	4216.18	5007.66	-0.2482	0.0023564	0.021247	Epb41	Band 4.1, C-terminal||Band 4.1-like protein 3||FERM/acyl-CoA-binding protein superfamily||FERM superfamily, second domain||Ubiquitin-like domain superfamily||FERM, C-terminal PH-like domain||FERM, N-terminal||Ezrin/radixin/moesin-like||FERM conserved site||FERM adjacent (FA)||PH-like domain superfamily||FERM central domain||Band 4.1 domain||FERM domain||SAB domain
ENSMUSG00000028907	1115.66	850.018	0.39234	0.00022509	0.0027978	Utp11	Small-subunit processome, Utp11
ENSMUSG00000028919	953.782	1628.26	-0.7716	2.5024e-14	1.3075e-12	Arhgef19	SH3 domain||PH-like domain superfamily||-||Pleckstrin homology domain||Dbl homology (DH) domain superfamily||SH3-like domain superfamily||Dbl homology (DH) domain
ENSMUSG00000028927	3290.2	6303.49	-0.93797	8.8489e-16	5.3983e-14	Padi2	Protein-arginine deiminase (PAD), central domain||Protein-arginine deiminase (PAD) N-terminal||Protein-arginine deiminase, central domain superfamily||Protein-arginine deiminase, C-terminal||Protein-arginine deiminase||Cupredoxin
ENSMUSG00000028946	161.499	86.3769	0.90281	0.0001419	0.0018593	Hes3	Orange domain||Myc-type, basic helix-loop-helix (bHLH) domain||Helix-loop-helix DNA-binding domain superfamily
ENSMUSG00000028948	1141.66	850.728	0.42436	3.8982e-05	0.00058066	Nol9	Polyribonucleotide 5'-hydroxyl-kinase Clp1, P-loop domain||-
ENSMUSG00000028949	2150.44	2675.46	-0.31516	0.00048004	0.0054141	Smarcd3	SWIB/MDM2 domain||SWIB/MDM2 domain superfamily||SWIB domain
ENSMUSG00000028957	1203.71	1977.8	-0.71641	6.9407e-14	3.5022e-12	Per3	Period circadian protein 3||PAS domain||-||PAS domain superfamily||PAS fold-3||Period circadian-like, C-terminal
ENSMUSG00000028959	2724.43	3421.16	-0.32853	0.00022107	0.0027518	Fastk	FAST kinase-like protein, subdomain 2||RAP domain||Fas activated serine/threonine kinase FAST||FAST kinase leucine-rich||-
ENSMUSG00000028961	2748.73	2317	0.24651	0.0041038	0.033832	Pgd	6-phosphogluconate dehydrogenase, NADP-binding||6-phosphogluconate dehydrogenase, C-terminal||6-phosphogluconate dehydrogenase||6-phosphogluconate dehydrogenase, decarboxylating||NAD(P)-binding domain superfamily||6-phosphogluconate dehydrogenase-like, C-terminal domain superfamily||6-phosphogluconate dehydrogenase, domain 2||6-phosphogluconate-binding site
ENSMUSG00000028962	6091.08	7379.64	-0.27685	0.0015732	0.014975	Slc4a2	Phosphotransferase/anion transporter||Band 3 cytoplasmic domain||Anion exchange protein||Bicarbonate transporter, eukaryotic||-||Anion exchange, conserved site||Anion exchange protein 2||Bicarbonate transporter, C-terminal
ENSMUSG00000028965	17.8598	4.00474	2.1569	0.0038794	0.032288	Tnfrsf9	TNFR/NGFR cysteine-rich region||Tumour necrosis factor receptor 9, N-terminal||Tumour necrosis factor receptor 9
ENSMUSG00000028967	8162.48	2533.69	1.6878	3.7456e-88	2.9493e-85	Errfi1	Cdc42 binding domain-like superfamily||Cdc42 binding domain-like||Mig-6 domain
ENSMUSG00000028970	321.223	213.085	0.59214	0.00027973	0.0033885	Abcb1b	-||ABC transporter, conserved site||AAA+ ATPase domain||P-loop containing nucleoside triphosphate hydrolase||ABC transporter type 1, transmembrane domain||ABC transporter-like||ABC transporter type 1, transmembrane domain superfamily
ENSMUSG00000028973	2015.73	2477.98	-0.29786	0.0010085	0.01027	Abcb8	-||ABC transporter, conserved site||AAA+ ATPase domain||P-loop containing nucleoside triphosphate hydrolase||ABC transporter-like||ABC transporter type 1, transmembrane domain||ABC transporter type 1, transmembrane domain superfamily
ENSMUSG00000028976	62.095	213.068	-1.7788	1.4811e-15	8.8134e-14	Slc2a5	MFS transporter superfamily||Fructose transporter, type 5 (GLUT5)||Major facilitator superfamily domain||Sugar transporter, conserved site||Major facilitator, sugar transporter-like||Sugar/inositol transporter
ENSMUSG00000028978	603.447	232.301	1.3772	3.3582e-23	3.3344e-21	Nos3	FAD-binding, type 1||Flavodoxin-like||Nitric-oxide synthase, eukaryote||Oxidoreductase FAD/NAD(P)-binding||Flavoprotein pyridine nucleotide cytochrome reductase||Flavoprotein-like superfamily||Nitric oxide synthase, N-terminal domain superfamily||Nitric oxide synthase, N-terminal||Ferredoxin reductase-type FAD-binding domain||Flavodoxin/nitric oxide synthase||Riboflavin synthase-like beta-barrel
ENSMUSG00000028980	1054.89	310.661	1.7637	3.0799e-25	3.3857e-23	H6pd	NagB/RpiA transferase-like||Glucose-6-phosphate dehydrogenase, NAD-binding||Glucose-6-phosphate dehydrogenase, C-terminal||Glucose-6-phosphate dehydrogenase||Glucosamine/galactosamine-6-phosphate isomerase||6-phosphogluconolactonase, DevB-type||Glucose-6-phosphate dehydrogenase, active site||NAD(P)-binding domain superfamily
ENSMUSG00000029014	1236.08	875.139	0.49819	1.2364e-06	2.5356e-05	Dnajc2	SANT/Myb domain||DnaJ domain, conserved site||DnaJ domain superfamily||Myb domain||Ribosome-associated complex head domain||SANT domain||DnaJ domain||Homeobox-like domain superfamily
ENSMUSG00000029029	1025.46	1318.4	-0.36252	0.0002384	0.0029512	Wrap73	Anaphase-promoting complex subunit 4, WD40 domain||Quinoprotein amine dehydrogenase, beta chain-like||WD40/YVTN repeat-like-containing domain superfamily||WD40-repeat-containing domain superfamily||WD40 repeat
ENSMUSG00000029048	2921.93	2440	0.26004	0.0033192	0.028336	Rer1	Retrieval of early ER protein Rer1
ENSMUSG00000029050	8119.22	5518.76	0.557	2.9572e-12	1.261e-10	Ski	c-SKI SMAD4-binding domain||SAND-like domain superfamily||Putative DNA-binding domain superfamily||Ski-like, DNA-binding domain superfamily||Ski oncogene||SKI/SNO/DAC domain||Transcription regulator SKI/SnoN
ENSMUSG00000029053	7022.9	8446.34	-0.26626	0.00095926	0.0098123	Prkcz	Protein kinase, C-terminal||PB1 domain||Diacylglycerol/phorbol-ester binding||Protein kinase-like domain superfamily||Protein kinase, ATP binding site||-||Protein kinase domain||Protein kinase C||Protein kinase C-like, phorbol ester/diacylglycerol-binding domain||Serine/threonine-protein kinase, active site||Protein kinase C, PB1 domain||AGC-kinase, C-terminal
ENSMUSG00000029056	1496.22	1862.24	-0.31572	0.00090149	0.0093114	Pank4	-||AF1104-like superfamily||Domain of unknown function DUF89||At2g17340, N-terminal||Pantothenate kinase, acetyl-CoA regulated, two-domain type||Type II pantothenate kinase
ENSMUSG00000029060	4484.83	5807	-0.37274	0.00058104	0.0063749	Mib2	Zinc finger, ZZ-type||Zinc finger, RING-type||Ankyrin repeat-containing domain||Zinc finger, RING/FYVE/PHD-type||Mib-herc2||Ankyrin repeat-containing domain superfamily||Mib/herc2 domain superfamily||Ankyrin repeat
ENSMUSG00000029062	3628.93	3007.3	0.27108	0.0015254	0.014585	Cdk11b	Protein kinase-like domain superfamily||Protein kinase domain||Serine/threonine-protein kinase, active site
ENSMUSG00000029063	2985.82	2520.49	0.24442	0.0048665	0.039177	Nadk	Inorganic polyphosphate/ATP-NAD kinase, N-terminal||ATP-NAD kinase, PpnK-type, C-terminal||NAD kinase/diacylglycerol kinase-like domain superfamily||-||NAD kinase
ENSMUSG00000029066	1667.16	1331.19	0.32467	0.00084237	0.0087811	Mrpl20	-||Ribosomal protein L20||Ribosomal protein L20, C-terminal
ENSMUSG00000029071	5244.05	6514.35	-0.31294	0.00095497	0.0097832	Dvl1	DIX domain||Dishevelled family||Dishevelled protein domain||PDZ domain||Dishevelled-1||Dishevelled C-terminal||Winged helix DNA-binding domain superfamily||Ubiquitin-like domain superfamily||Winged helix-like DNA-binding domain superfamily||DEP domain||Dishevelled-related protein||PDZ superfamily
ENSMUSG00000029082	101.141	23.4376	2.1095	1.9637e-10	6.9115e-09	Bst1	ADP-ribosyl cyclase (CD38/157)||-
ENSMUSG00000029084	1585.32	1220.94	0.37679	0.00012798	0.0016946	Cd38	ADP-ribosyl cyclase/cyclic ADP-ribose hydrolase 1||ADP-ribosyl cyclase (CD38/157)
ENSMUSG00000029095	7336.75	9875.56	-0.42872	8.7627e-08	2.188e-06	Ablim2	Actin-binding LIM protein 2||-||Zinc finger, LIM-type||Villin headpiece domain superfamily||Villin headpiece||Putative adherens-junction anchoring domain
ENSMUSG00000029110	4037.18	2887.75	0.4834	1.4687e-08	4.1648e-07	Rnf4	Zinc finger, RING-type||Zinc finger, RING-type, conserved site||Zinc finger, RING/FYVE/PHD-type||-
ENSMUSG00000029119	1692.36	2143.26	-0.34077	0.00055283	0.0061129	Man2b2	Galactose mutarotase-like domain superfamily||Glycoside hydrolase 38/57, N-terminal||Glycoside hydrolase family 38, central domain||Glycoside hydrolase/deacetylase, beta/alpha-barrel||Glycoside hydrolase family 38, N-terminal domain||Glycoside hydrolase families 57/38, central domain superfamily||Glycoside hydrolase family 38, central domain superfamily||Glycosyl hydrolase family 38, C-terminal
ENSMUSG00000029122	441.966	724.586	-0.71322	1.0905e-08	3.1396e-07	Evc	-||Limbin/Ellis-van Creveld protein||Ellis-van Creveld protein
ENSMUSG00000029130	202.062	286.751	-0.505	0.0020847	0.019071	Rnf32	Zinc finger, RING-type||RING-type zinc-finger, LisH dimerisation motif||IQ motif, EF-hand binding site||Zinc finger, RING/FYVE/PHD-type||-
ENSMUSG00000029135	3444.54	388.135	3.1497	1.4462e-38	2.9146e-36	Fosl2	AP-1 transcription factor||Fos-related antigen 2||Basic-leucine zipper domain
ENSMUSG00000029147	2816.81	2172.58	0.37465	1.928e-05	0.00030864	Ppm1g	-||PPM-type phosphatase domain superfamily||Protein phosphatase 2C family||PPM-type phosphatase, divalent cation binding||PPM-type phosphatase domain
ENSMUSG00000029151	2539.25	3138.05	-0.30546	0.00045515	0.0051748	Slc30a3	Cation efflux protein, cytoplasmic domain superfamily||Cation efflux transmembrane domain superfamily||-||Cation efflux protein
ENSMUSG00000029161	774.424	553.998	0.48324	2.9069e-05	0.00044778	Cgref1	EF-hand domain||EF-Hand 1, calcium-binding site||EF-hand domain pair
ENSMUSG00000029162	1162.14	1478.21	-0.34707	0.0025055	0.022306	Khk	Ribokinase-like||Carbohydrate kinase PfkB||Ketohexokinase
ENSMUSG00000029163	394.062	167.76	1.232	5.5921e-06	0.00010061	Emilin1	EMI domain||C1q domain||Collagen triple helix repeat||Insect cysteine-rich antifreeze protein||Tumour necrosis factor-like domain superfamily
ENSMUSG00000029167	1849.17	2300.97	-0.31536	0.00050488	0.0056398	Ppargc1a	Peroxisome proliferator-activated receptor gamma coactivator 1-alpha||RNA recognition motif domain||PGC-1||RNA-binding domain superfamily||-||PGC-1alpha, RNA recognition motif
ENSMUSG00000029169	3469.56	2879.06	0.26915	0.0017391	0.016302	Dhx15	DNA/RNA helicase, ATP-dependent, DEAH-box type, conserved site||DEAD/DEAH box helicase domain||-||Domain of unknown function DUF1605||Helicase-associated domain||Helicase superfamily 1/2, ATP-binding domain||Helicase, C-terminal||P-loop containing nucleoside triphosphate hydrolase
ENSMUSG00000029171	895.366	414.957	1.1095	1.4696e-20	1.2408e-18	Pgm1	Alpha-D-phosphohexomutase, alpha/beta/alpha I/II/III||-||Alpha-D-phosphohexomutase, conserved site||Alpha-D-phosphohexomutase, alpha/beta/alpha domain I||Alpha-D-phosphohexomutase, alpha/beta/alpha domain III||Alpha-D-phosphohexomutase, C-terminal||Alpha-D-phosphohexomutase, C-terminal domain superfamily||Alpha-D-phosphohexomutase, alpha/beta/alpha domain II
ENSMUSG00000029175	2753.07	2067.74	0.41299	3.4852e-06	6.5594e-05	Slc35f6	Nucleotide-sugar transporter-related||-||Solute carrier family 35 member SLC35F1/F2/F6
ENSMUSG00000029189	1837.95	1481.79	0.31076	0.0036133	0.030433	Sel1l3	Sel1-like repeat
ENSMUSG00000029201	1342.97	832.64	0.68966	1.7261e-11	6.7254e-10	Ugdh	UDP-glucose/GDP-mannose dehydrogenase, N-terminal||UDP-glucose 6-dehydrogenase, eukaryotic type||NAD(P)-binding domain superfamily||Cytochrome c1, transmembrane anchor, C-terminal||UDP-glucose/GDP-mannose dehydrogenase||UDP-glucose/GDP-mannose dehydrogenase, C-terminal domain superfamily||UDP-glucose/GDP-mannose dehydrogenase, dimerisation||6-phosphogluconate dehydrogenase-like, C-terminal domain…
ENSMUSG00000029204	89.0927	28.0178	1.669	6.0781e-06	0.00010831	Rhoh	Small GTPase superfamily, Rho type||P-loop containing nucleoside triphosphate hydrolase||Small GTPase superfamily||Small GTP-binding protein domain
ENSMUSG00000029207	4121.59	3166.56	0.38028	6.5579e-05	0.00092786	Apbb2	-||PH-like domain superfamily||WW domain||PTB/PI domain||WW domain superfamily
ENSMUSG00000029208	937.253	1261.27	-0.42837	3.0076e-05	0.00046141	Guf1	Transcription factor, GTP-binding domain||EF-G domain III/V-like||Elongation factor EFG, domain V-like||-||Translation elongation factor EFTu-like, domain 2||Translation protein, beta-barrel domain superfamily||Small GTP-binding protein domain||Tr-type G domain, conserved site||GTP-binding protein LepA, C-terminal||Elongation factor 4, domain IV||Elongation factor 4||P-loop containing nucleoside …
ENSMUSG00000029211	370.506	516.044	-0.47799	0.000254	0.0031103	Gabra4	Neurotransmitter-gated ion-channel ligand-binding domain superfamily||Neurotransmitter-gated ion-channel||Neurotransmitter-gated ion-channel, conserved site||Neurotransmitter-gated ion-channel transmembrane domain||Neurotransmitter-gated ion-channel ligand-binding domain||-||Gamma-aminobutyric-acid A receptor, alpha 4 subunit||Gamma-aminobutyric-acid A receptor, alpha subunit||Gamma-aminobutyric …
ENSMUSG00000029212	2661.39	3248.49	-0.28759	0.00080261	0.0084446	Gabrb1	Gamma-aminobutyric acid A receptor/Glycine receptor alpha||Gamma-aminobutyric-acid A receptor, beta subunit||Neurotransmitter-gated ion-channel transmembrane domain superfamily||Neurotransmitter-gated ion-channel||Neurotransmitter-gated ion-channel transmembrane domain||Neurotransmitter-gated ion-channel, conserved site||Neurotransmitter-gated ion-channel ligand-binding domain superfamily||Neurot…
ENSMUSG00000029217	281.28	112.448	1.3227	1.1208e-06	2.3098e-05	Tec	PH-like domain superfamily||Tyrosine-protein kinase, active site||Tyrosine-protein kinase Tec, SH3 domain||SH2 domain superfamily||SH2 domain||Pleckstrin homology domain||Tyrosine-protein kinase, catalytic domain||-||Zinc finger, Btk motif||Protein kinase, ATP binding site||Protein kinase domain||Serine-threonine/tyrosine-protein kinase, catalytic domain||Protein kinase-like domain superfamily||S…
ENSMUSG00000029228	773.269	1158.99	-0.58383	4.7647e-08	1.239e-06	Lnx1	Zinc finger, RING-type, conserved site||PDZ domain||PDZ superfamily||Zinc finger, RING-type||-||Zinc finger, RING/FYVE/PHD-type
[truncated: 2,717 more rows]

## Sheet: SCI(VX-765)vs SCI(DMSO)
Table SI. Differentially expressed genes of different groups.
[truncated: 2,900 more rows]
